# Supplementary material for: Theoretical prediction of the synthesis of 2,3-dihydropyridines through Ir(iii)-catalysed reaction of unsaturated oximes with alkenes
Source: Royal Society of Chemistry journal article supplement (doi:10.1039/c6ra25501a), 2017-01-01
Supplement: c6ra25501a1.pdf [file c6ra25501a1.pdf]

## Supplementary information

### Theoretical prediction of the synthesis of 2,3-dihydropyridines through Ir(III)-catalysed reaction of unsaturated oximes with alkenes

Lei Zhang,<sup>b</sup> Xiang-Biao Zhang,<sup>\*a</sup> Dan-Dan Zhang,<sup>a</sup> and Sheng-Gui He<sup>\*c</sup>

<sup>a</sup> School of Chemical Engineering, Anhui University of Science and Technology, Huainan 232001, People's Republic of China. E-mail: [xbzhang\\_theochem@yahoo.com](mailto:xbzhang_theochem@yahoo.com)

<sup>b</sup> School of Materials Science and Engineering, Anhui University of Science and Technology, Huainan 232001, People's Republic of China.

<sup>c</sup> Beijing National Laboratory for Molecular Sciences, State Key Laboratory for Structural Chemistry of Unstable and Stable Species, Institute of Chemistry, Chinese Academy of Science, Beijing 100190, People's Republic of China. E-mail: [shengguihe@iccas.ac.cn](mailto:shengguihe@iccas.ac.cn)

#### CONTENTS

|                                                                                                        |   |
|--------------------------------------------------------------------------------------------------------|---|
| S1. The B3LY/BS1 calculated main bond parameters for Cp*Ir catalyst <b>M</b> .....                     | 1 |
| S2. Figure S1 .....                                                                                    | 2 |
| S3. Figure S2 .....                                                                                    | 4 |
| S4. Figure S3 .....                                                                                    | 5 |
| S5. Optimised Cartesian coordinates and electronic energies (E) for species involved in the study..... | 6 |

#### S1. The B3LY/BS1 calculated main bond parameters for Cp\*Ir catalyst **M**

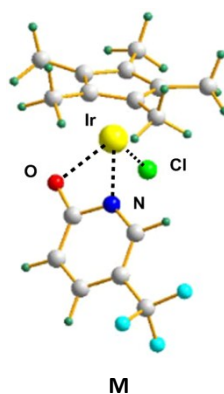

**Table 1.** Calculated main bond parameters by the B3LYP/BS1 method and corresponding experimental data

| Bond Parameters | B3LYP/BS1 | Experimental Data <sup>1</sup> |
|-----------------|-----------|--------------------------------|
| Ir - N          | 2.138     | 2.108                          |
| Ir - O          | 2.211     | 2.229                          |
| Ir - Cl         | 2.417     | 2.380                          |
| N - Ir - O      | 60.8      | 60.6                           |

|             |      |      |
|-------------|------|------|
| N - Ir - Cl | 85.1 | 85.3 |
| O - Ir - Cl | 87.1 | 85.2 |

#### Reference

1 R. Yamaguchi, C. Ikeda, Y. Takahashi and K. Fujita, *J. Am. Chem. Soc.*, 2009, **131**, 8410-8412.

**S2. Figure S1. (a)** Optimised structures of selective species in the catalytic cycle. For clarity, H atoms that are not involved in the reaction and the methyls on Cp\* and pivaloyls are omitted. **(b)** Transition states **TS5a-6a**, **TS5b-6b**, **TS5c-6c**, and **TS5d-6d** that are involved in the reaction catalysed by **1-CF<sub>3</sub>**. The distances are given in Å, the angles and dihedral angles are given in degrees.

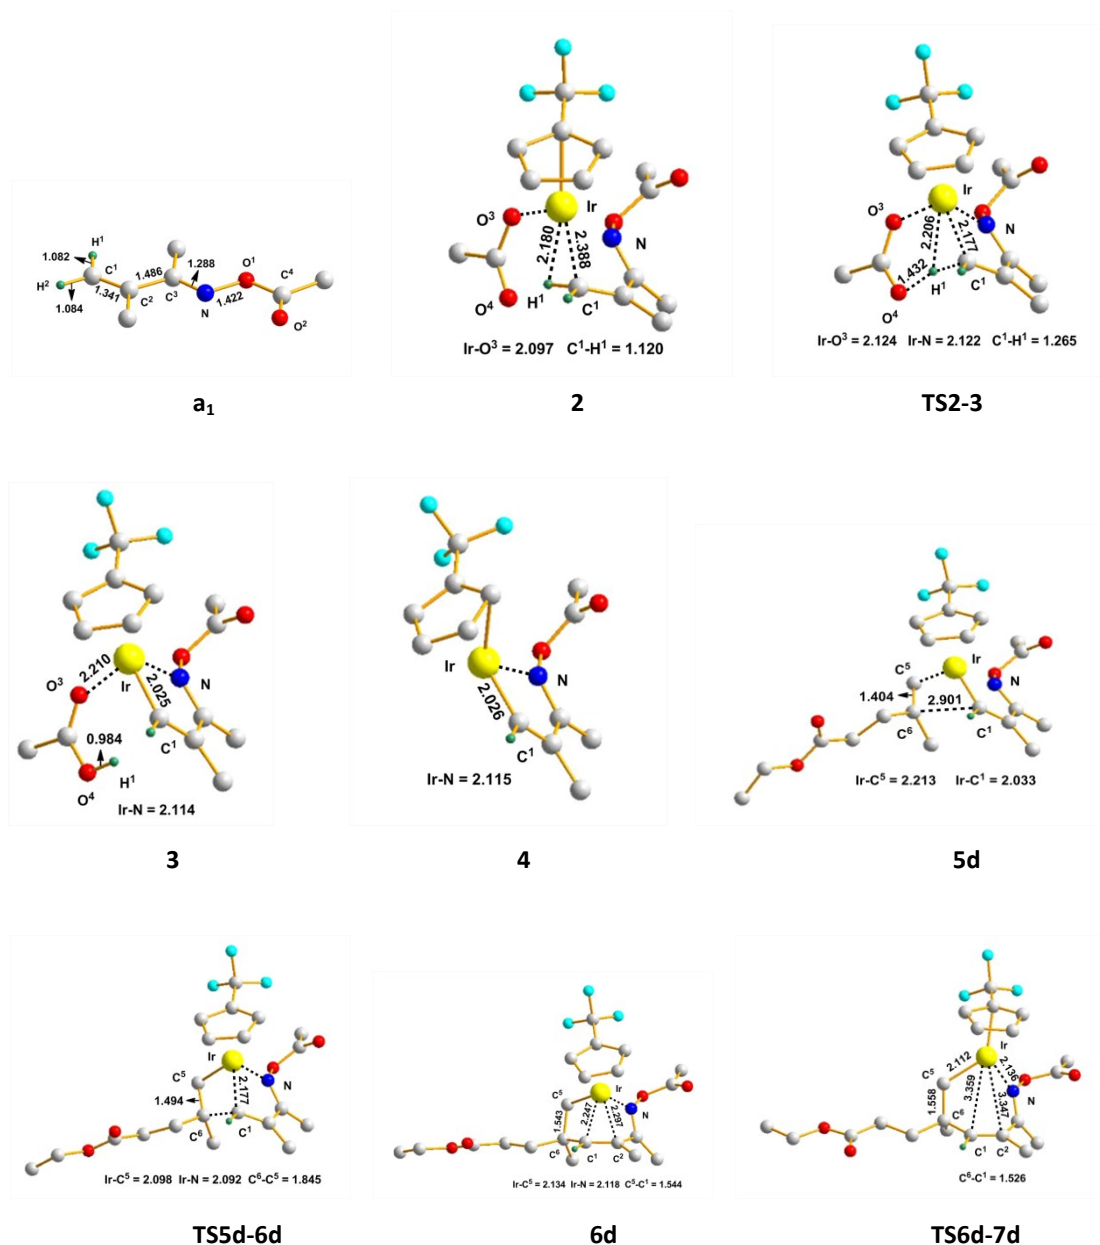

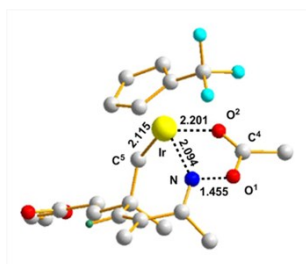

8

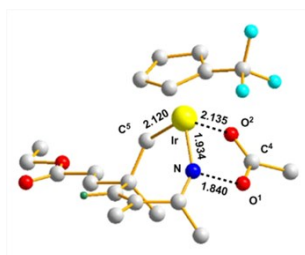

TS8-9

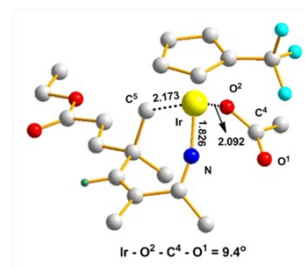

9

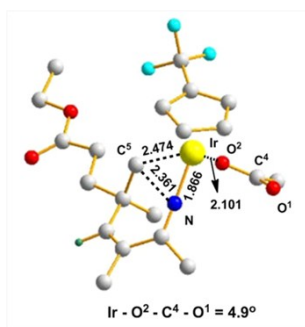

TS9-10

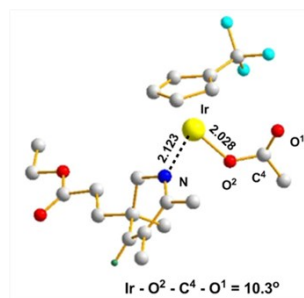

10

(a)

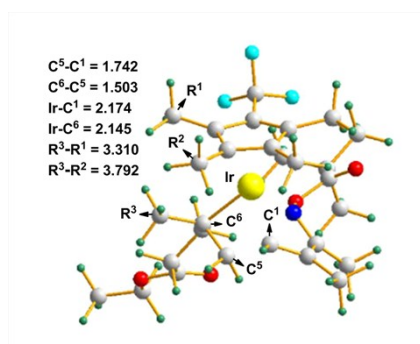

TS5a-6a

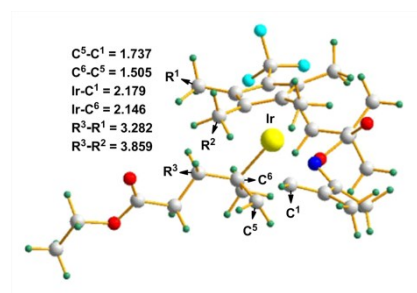

TS5b-6b

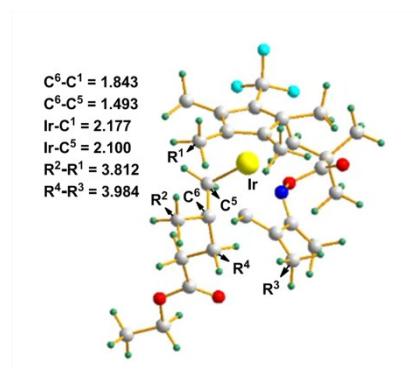

TS5c-6c

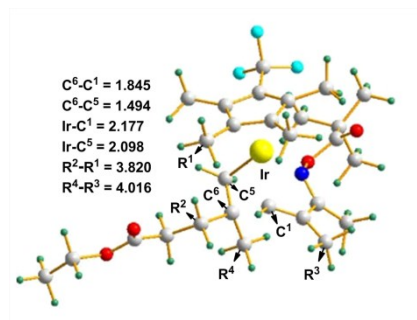

TS5d-6d

(b)

**S3. Figure S2.** Optimised structures for selected species in the reactions catalysed by **1-CH<sub>3</sub>**, **1-NH<sub>2</sub>**, and **1-N(CH<sub>3</sub>)<sub>2</sub>**. For clarity, H atoms that are not involved in the reactions and the methyls on Cp\* and pivaloyls are omitted. The distances are given in Å, and angles are given in degrees.

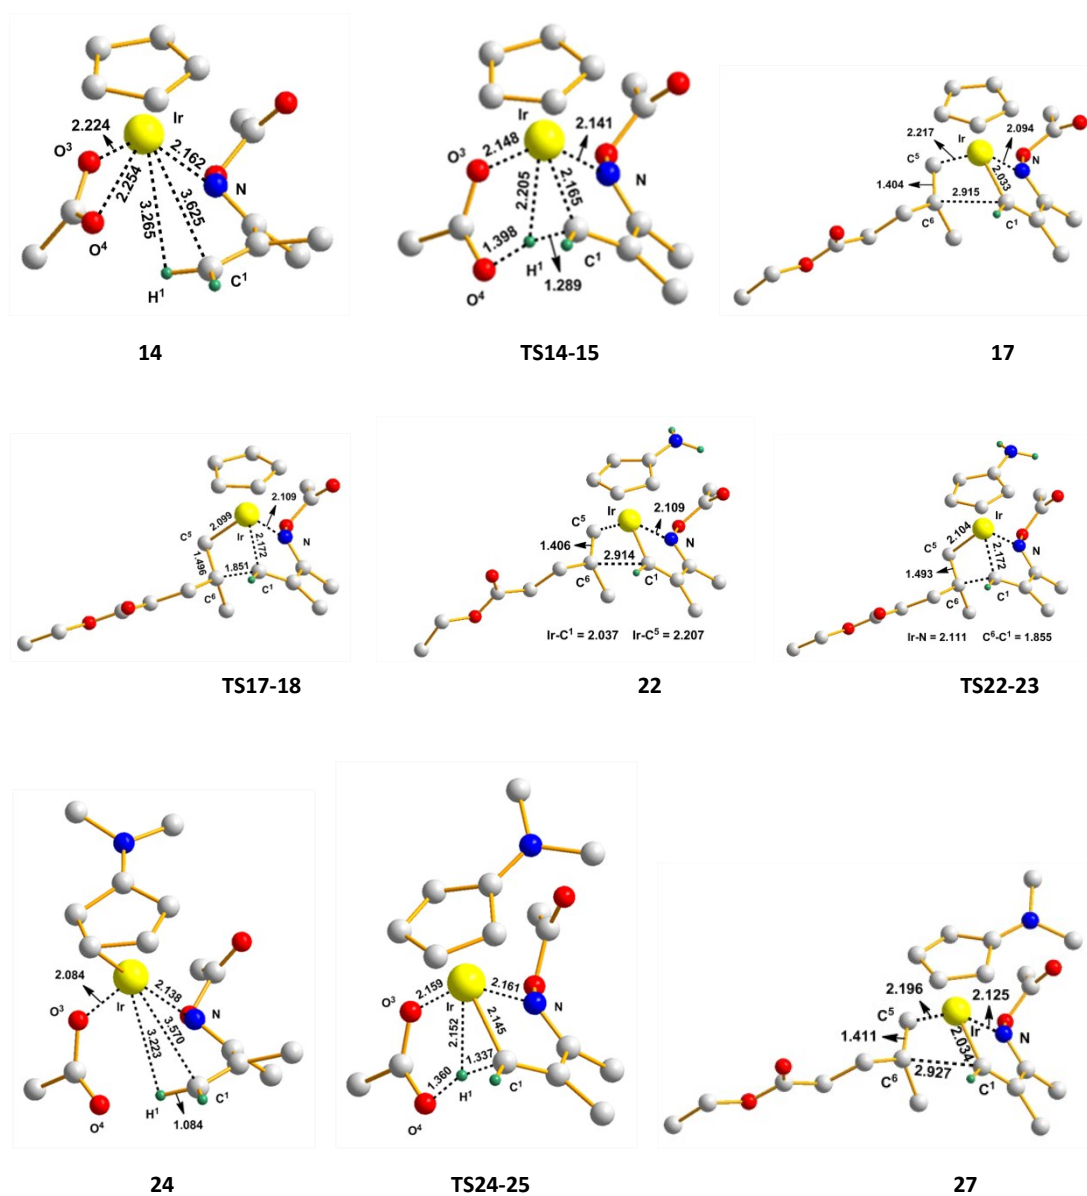

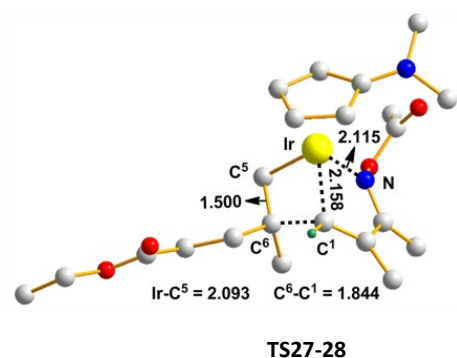

**S4. Figure S3.** Optimised structures of selected species in the reactions of  $\text{NH}_2$ -, phenyl-, and  $p\text{-CF}_3$ -phenyl-substituted  $\alpha,\beta$ -unsaturated oxime pivalates with alkene **b**<sub>1</sub>, and the reactions of  $\alpha,\beta$ -unsaturated oxime pivalates **a**<sub>1</sub> with alkenes **b**<sub>2</sub>-**b**<sub>5</sub>. For clarity, H atoms that are not involved in the reactions and the methyls on Cp\* and pivaloyls are omitted. The distances are given in Å, and the angles in degrees.

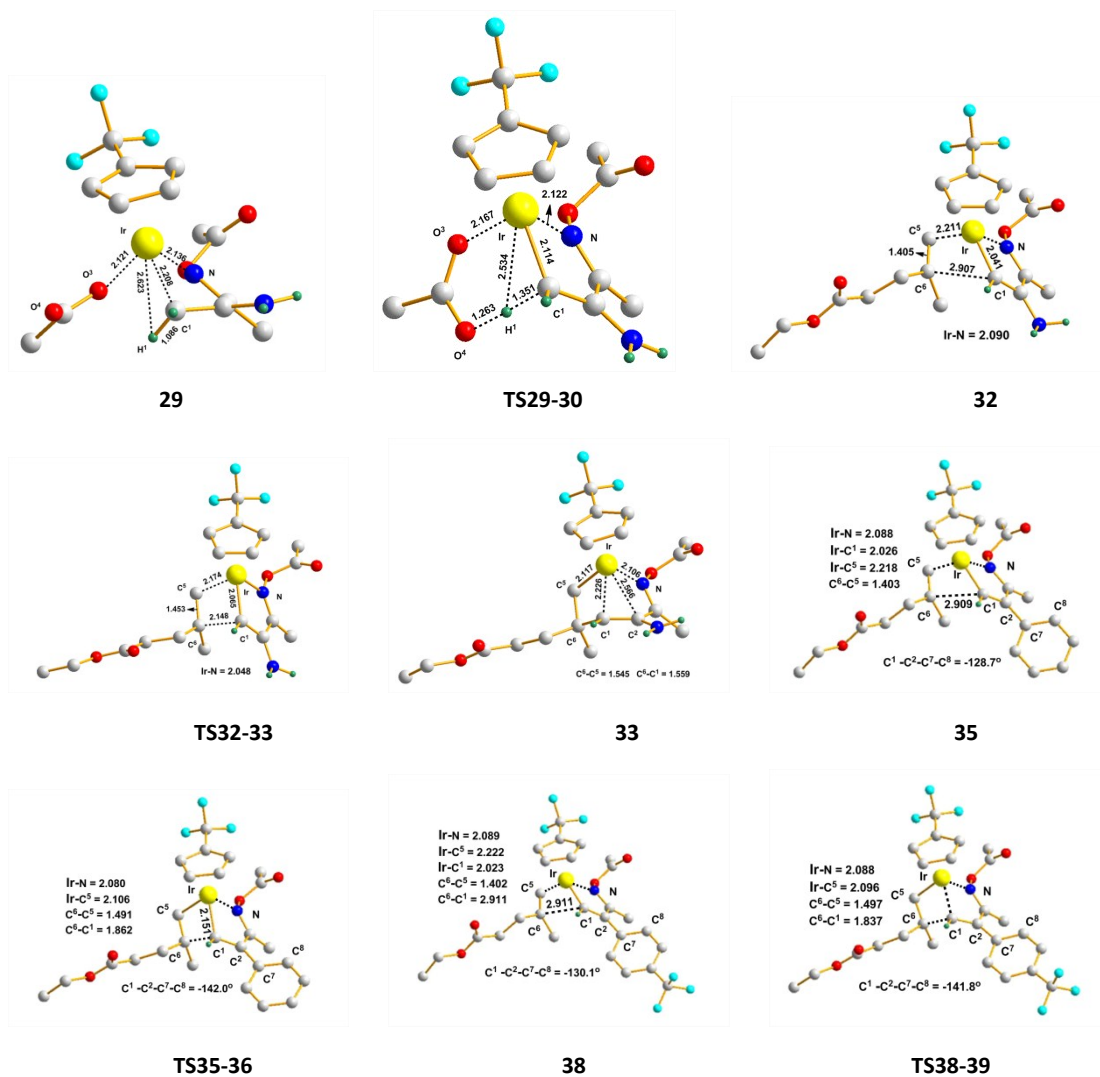

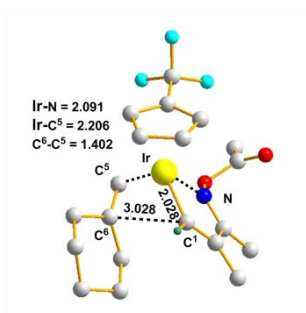

46

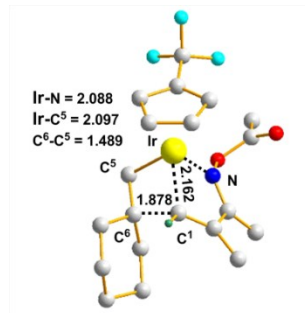

TS46-47

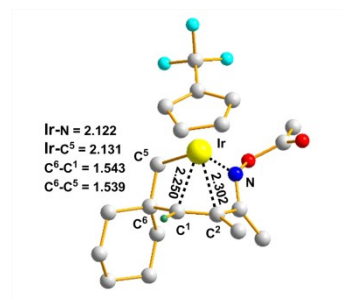

47

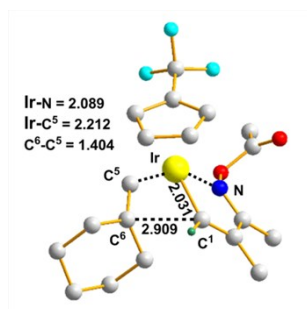

48

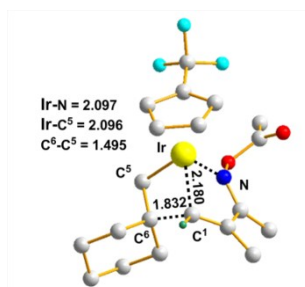

TS48-49

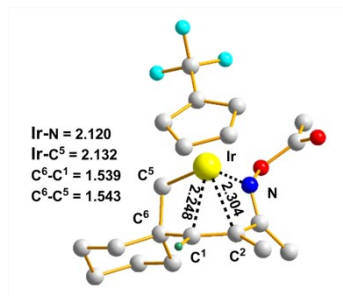

49

## S5. Optimised Cartesian coordinates and electronic energies (E) for species involved in the study

In Gas:

**M** (E = -1615.0489385 au)

| Center Number | Atomic Number | Coordinates (Angstroms) |           |           |
|---------------|---------------|-------------------------|-----------|-----------|
|               |               | X                       | Y         | Z         |
| 1             | 77            | 1.014327                | -0.171824 | -0.065012 |
| 2             | 17            | 0.549885                | -2.540794 | 0.056163  |
| 3             | 8             | -0.526448               | -0.066263 | -1.647710 |
| 4             | 7             | -1.036397               | 0.073132  | 0.489443  |
| 5             | 6             | 2.098277                | 1.730704  | -0.085539 |
| 6             | 6             | 2.193379                | 1.122793  | 1.224777  |
| 7             | 6             | 2.843723                | -0.158706 | 1.094841  |
| 8             | 6             | 3.175059                | -0.344414 | -0.313034 |
| 9             | 6             | 2.710146                | 0.811587  | -1.027082 |
| 10            | 6             | 1.596645                | 3.113328  | -0.401213 |
| 11            | 6             | 1.739821                | 1.752625  | 2.512244  |
| 12            | 6             | 3.223277                | -1.099681 | 2.203572  |
| 13            | 6             | 3.918596                | -1.523454 | -0.875105 |
| 14            | 6             | 2.822321                | 1.050039  | -2.506425 |
| 15            | 6             | -1.504881               | 0.000342  | -0.792525 |
| 16            | 6             | -2.895503               | -0.003761 | -1.052324 |
| 17            | 6             | -3.750215               | 0.062875  | 0.037545  |
| 18            | 6             | -3.250296               | 0.114136  | 1.359416  |
| 19            | 6             | -1.875345               | 0.102141  | 1.542834  |
| 20            | 1             | 1.150565                | 3.154316  | -1.398859 |
| 21            | 1             | 2.420458                | 3.840273  | -0.368625 |
| 22            | 1             | 0.836031                | 3.436242  | 0.315322  |
| 23            | 1             | 0.867146                | 2.393567  | 2.359012  |
| 24            | 1             | 2.544676                | 2.373607  | 2.928583  |

|    |   |           |           |           |
|----|---|-----------|-----------|-----------|
| 25 | 1 | 1.480751  | 0.996210  | 3.257980  |
| 26 | 1 | 2.627074  | -0.921236 | 3.102494  |
| 27 | 1 | 4.282667  | -0.973163 | 2.466096  |
| 28 | 1 | 3.061792  | -2.138361 | 1.902734  |
| 29 | 1 | 3.540123  | -2.458467 | -0.452668 |
| 30 | 1 | 4.989522  | -1.442862 | -0.644343 |
| 31 | 1 | 3.807882  | -1.586461 | -1.960519 |
| 32 | 1 | 2.976102  | 0.115719  | -3.051122 |
| 33 | 1 | 3.671279  | 1.714456  | -2.717087 |
| 34 | 1 | 1.915185  | 1.517328  | -2.899806 |
| 35 | 1 | -3.252759 | -0.071752 | -2.070201 |
| 36 | 1 | -1.426255 | 0.114801  | 2.528886  |
| 37 | 1 | -3.919694 | 0.150628  | 2.208430  |
| 38 | 6 | -5.241721 | 0.096269  | -0.160020 |
| 39 | 9 | -5.619268 | -0.098256 | -1.460131 |
| 40 | 9 | -5.776057 | 1.308585  | 0.230730  |
| 41 | 9 | -5.884327 | -0.859569 | 0.593257  |

In 2-Propanol:

**1-CF<sub>3</sub>** (E = -1020.9239473 au)

| Center Number | Atomic Number | Coordinates (Angstroms) |           |           |
|---------------|---------------|-------------------------|-----------|-----------|
|               |               | X                       | Y         | Z         |
| 1             | 77            | -0.112827               | -0.698918 | -0.424039 |
| 2             | 6             | 0.837119                | 0.996921  | 0.323229  |
| 3             | 6             | 1.825283                | 0.340222  | -0.524992 |
| 4             | 6             | 2.069162                | -0.950733 | 0.031202  |
| 5             | 6             | 1.261555                | -1.101009 | 1.216522  |
| 6             | 6             | 0.513558                | 0.126878  | 1.444348  |
| 7             | 6             | 0.431952                | 2.437799  | 0.143949  |
| 8             | 9             | -0.041192               | 2.697784  | -1.116078 |
| 9             | 9             | 1.531872                | 3.246626  | 0.329339  |
| 10            | 9             | -0.518279               | 2.851423  | 1.024670  |
| 11            | 6             | 2.468082                | 0.914390  | -1.750035 |
| 12            | 1             | 2.759809                | 0.128430  | -2.449335 |
| 13            | 1             | 1.810393                | 1.614256  | -2.267726 |
| 14            | 1             | 3.375926                | 1.456362  | -1.454352 |
| 15            | 6             | 2.996399                | -1.988668 | -0.526471 |
| 16            | 1             | 3.970427                | -1.906927 | -0.027153 |
| 17            | 1             | 2.617705                | -2.999357 | -0.357813 |
| 18            | 1             | 3.155809                | -1.856127 | -1.598248 |
| 19            | 6             | 1.240640                | -2.298572 | 2.112441  |
| 20            | 1             | 0.268669                | -2.431020 | 2.592059  |
| 21            | 1             | 1.488165                | -3.213082 | 1.570158  |
| 22            | 1             | 1.991633                | -2.160418 | 2.902320  |
| 23            | 6             | -0.320557               | 0.437709  | 2.647473  |
| 24            | 1             | -0.545248               | -0.470457 | 3.209140  |
| 25            | 1             | 0.240368                | 1.115451  | 3.303991  |
| 26            | 1             | -1.257520               | 0.919464  | 2.366944  |
| 27            | 8             | -2.074786               | -0.818930 | -0.753651 |
| 28            | 6             | -3.102635               | -0.191619 | -0.169708 |
| 29            | 8             | -2.966352               | 0.710309  | 0.631372  |
| 30            | 6             | -4.439834               | -0.731266 | -0.626057 |
| 31            | 1             | -5.252247               | -0.169859 | -0.162780 |
| 32            | 1             | -4.519035               | -0.666423 | -1.716203 |
| 33            | 1             | -4.523993               | -1.789468 | -0.354589 |

**2** (E = -1617.4515724 au)

| Center Number | Atomic | Coordinates (Angstroms) |  |  |
|---------------|--------|-------------------------|--|--|
|---------------|--------|-------------------------|--|--|

|    | Number | X         | Y         | Z         |
|----|--------|-----------|-----------|-----------|
| 1  | 77     | -0.910238 | 0.224463  | 0.171685  |
| 2  | 6      | -1.080814 | -1.774597 | -0.509621 |
| 3  | 6      | -1.291415 | -0.944830 | -1.699511 |
| 4  | 6      | -2.440403 | -0.150425 | -1.440451 |
| 5  | 6      | -2.983477 | -0.519681 | -0.130754 |
| 6  | 6      | -2.187469 | -1.565908 | 0.416603  |
| 7  | 6      | -0.096724 | -2.902223 | -0.414757 |
| 8  | 9      | 1.071508  | -2.655243 | -1.082949 |
| 9  | 9      | -0.631961 | -4.046360 | -0.971113 |
| 10 | 9      | 0.241134  | -3.214907 | 0.872948  |
| 11 | 6      | -0.509965 | -0.981346 | -2.979188 |
| 12 | 1      | -0.747166 | -0.120043 | -3.605807 |
| 13 | 1      | 0.565432  | -0.996426 | -2.804816 |
| 14 | 1      | -0.782646 | -1.888507 | -3.534166 |
| 15 | 6      | -3.090596 | 0.802328  | -2.399594 |
| 16 | 1      | -3.840234 | 0.256156  | -2.986904 |
| 17 | 1      | -3.605946 | 1.613836  | -1.881987 |
| 18 | 1      | -2.371878 | 1.240523  | -3.094406 |
| 19 | 6      | -4.249285 | 0.028517  | 0.459503  |
| 20 | 1      | -4.253472 | -0.040326 | 1.548778  |
| 21 | 1      | -4.406027 | 1.073324  | 0.183169  |
| 22 | 1      | -5.101978 | -0.547752 | 0.077311  |
| 23 | 6      | -2.429611 | -2.291219 | 1.707215  |
| 24 | 1      | -3.265267 | -1.849442 | 2.251837  |
| 25 | 1      | -2.674882 | -3.339026 | 1.497345  |
| 26 | 1      | -1.546318 | -2.269415 | 2.348410  |
| 27 | 8      | -0.155390 | -0.002134 | 2.115519  |
| 28 | 6      | 0.012583  | 0.945438  | 2.993778  |
| 29 | 8      | -0.245114 | 2.135944  | 2.804848  |
| 30 | 6      | 0.538949  | 0.446108  | 4.329466  |
| 31 | 1      | 1.236008  | -0.384122 | 4.193355  |
| 32 | 1      | 1.023168  | 1.261677  | 4.870690  |
| 33 | 1      | -0.305006 | 0.084076  | 4.929412  |
| 34 | 6      | 0.930328  | 2.516445  | -0.541178 |
| 35 | 7      | 0.922501  | 1.266967  | -0.193796 |
| 36 | 6      | -0.421975 | 3.058477  | -0.755751 |
| 37 | 6      | -0.643893 | 4.090722  | -1.825086 |
| 38 | 1      | -1.699359 | 4.364204  | -1.883225 |
| 39 | 1      | -0.064470 | 4.998266  | -1.614960 |
| 40 | 1      | -0.319534 | 3.720983  | -2.805852 |
| 41 | 6      | 2.155135  | 3.358111  | -0.712187 |
| 42 | 1      | 1.978053  | 4.363662  | -0.321074 |
| 43 | 1      | 3.017613  | 2.925509  | -0.207724 |
| 44 | 1      | 2.386659  | 3.455003  | -1.780807 |
| 45 | 6      | -1.396312 | 2.559603  | 0.050068  |
| 46 | 1      | -2.423573 | 2.882745  | -0.059180 |
| 47 | 1      | -1.108411 | 2.200805  | 1.070800  |
| 48 | 8      | 2.152946  | 0.735024  | 0.236609  |
| 49 | 6      | 2.883664  | 0.067286  | -0.741402 |
| 50 | 8      | 2.536687  | 0.049717  | -1.888372 |
| 51 | 6      | 4.146601  | -0.546799 | -0.132008 |
| 52 | 6      | 3.781069  | -1.430416 | 1.089516  |
| 53 | 1      | 3.100416  | -2.239634 | 0.806036  |
| 54 | 1      | 4.697668  | -1.879171 | 1.486223  |
| 55 | 1      | 3.313438  | -0.843562 | 1.884683  |
| 56 | 6      | 4.844668  | -1.396349 | -1.215757 |
| 57 | 1      | 5.756473  | -1.831958 | -0.795125 |
| 58 | 1      | 4.200609  | -2.212317 | -1.558736 |
| 59 | 1      | 5.120489  | -0.788958 | -2.083077 |
| 60 | 6      | 5.083972  | 0.610814  | 0.316996  |
| 61 | 1      | 6.012424  | 0.180346  | 0.706226  |

|    |   |          |          |           |
|----|---|----------|----------|-----------|
| 62 | 1 | 5.340464 | 1.265253 | -0.523756 |
| 63 | 1 | 4.628716 | 1.211752 | 1.109932  |

**TS2-3** (E = -1617.4475218 au)

| Center Number | Atomic Number | Coordinates (Angstroms) |           |           |
|---------------|---------------|-------------------------|-----------|-----------|
|               |               | X                       | Y         | Z         |
| 1             | 77            | -0.943997               | 0.258620  | 0.275652  |
| 2             | 6             | -1.144839               | -1.781533 | -0.455996 |
| 3             | 6             | -1.310254               | -0.899401 | -1.605747 |
| 4             | 6             | -2.450059               | -0.080533 | -1.342122 |
| 5             | 6             | -3.019773               | -0.472688 | -0.057499 |
| 6             | 6             | -2.238822               | -1.547558 | 0.469549  |
| 7             | 6             | -0.206385               | -2.942710 | -0.390176 |
| 8             | 9             | 0.967431                | -2.730563 | -1.065024 |
| 9             | 9             | -0.778186               | -4.066590 | -0.958829 |
| 10            | 9             | 0.134065                | -3.293802 | 0.890161  |
| 11            | 6             | -0.527461               | -0.913280 | -2.885689 |
| 12            | 1             | -0.712719               | -0.007611 | -3.465748 |
| 13            | 1             | 0.544392                | -1.000280 | -2.715316 |
| 14            | 1             | -0.853840               | -1.771828 | -3.487396 |
| 15            | 6             | -3.057540               | 0.910506  | -2.292234 |
| 16            | 1             | -3.755863               | 0.386337  | -2.957355 |
| 17            | 1             | -3.619888               | 1.684883  | -1.766453 |
| 18            | 1             | -2.302433               | 1.398328  | -2.911862 |
| 19            | 6             | -4.292617               | 0.070442  | 0.525560  |
| 20            | 1             | -4.331399               | -0.058124 | 1.608861  |
| 21            | 1             | -4.414759               | 1.133707  | 0.306536  |
| 22            | 1             | -5.148376               | -0.460058 | 0.088580  |
| 23            | 6             | -2.511617               | -2.289517 | 1.745519  |
| 24            | 1             | -3.276210               | -1.783860 | 2.336904  |
| 25            | 1             | -2.877089               | -3.296020 | 1.507211  |
| 26            | 1             | -1.612449               | -2.391888 | 2.354698  |
| 27            | 8             | -0.253514               | 0.052765  | 2.273954  |
| 28            | 6             | -0.355257               | 1.005717  | 3.123456  |
| 29            | 8             | -0.790777               | 2.147621  | 2.838946  |
| 30            | 6             | 0.074737                | 0.702178  | 4.540308  |
| 31            | 1             | 0.793327                | 1.456517  | 4.874819  |
| 32            | 1             | -0.799251               | 0.761484  | 5.198274  |
| 33            | 1             | 0.516668                | -0.291965 | 4.611807  |
| 34            | 6             | 0.992258                | 2.492743  | -0.235188 |
| 35            | 7             | 0.930268                | 1.209442  | -0.018025 |
| 36            | 6             | -0.333750               | 3.106976  | -0.359855 |
| 37            | 6             | -0.495525               | 4.418618  | -1.076278 |
| 38            | 1             | -1.543713               | 4.725453  | -1.080098 |
| 39            | 1             | 0.093178                | 5.209953  | -0.595609 |
| 40            | 1             | -0.149693               | 4.346243  | -2.115575 |
| 41            | 6             | 2.254065                | 3.290446  | -0.330171 |
| 42            | 1             | 2.188407                | 4.170181  | 0.318518  |
| 43            | 1             | 3.133232                | 2.713022  | -0.052624 |
| 44            | 1             | 2.378247                | 3.652956  | -1.358117 |
| 45            | 6             | -1.344917               | 2.398157  | 0.229442  |
| 46            | 1             | -2.357510               | 2.782006  | 0.148890  |
| 47            | 1             | -1.091062               | 2.127302  | 1.438391  |
| 48            | 8             | 2.132911                | 0.584879  | 0.367543  |
| 49            | 6             | 2.830280                | -0.049753 | -0.653219 |
| 50            | 8             | 2.489133                | 0.030765  | -1.799487 |
| 51            | 6             | 4.062353                | -0.764411 | -0.090170 |
| 52            | 6             | 3.675033                | -1.656335 | 1.117674  |
| 53            | 1             | 2.934647                | -2.410957 | 0.834470  |
| 54            | 1             | 4.571103                | -2.174951 | 1.474144  |

|    |   |          |           |           |
|----|---|----------|-----------|-----------|
| 55 | 1 | 3.270851 | -1.063191 | 1.942431  |
| 56 | 6 | 4.680601 | -1.624957 | -1.213353 |
| 57 | 1 | 5.572215 | -2.128829 | -0.826969 |
| 58 | 1 | 3.978394 | -2.389001 | -1.562034 |
| 59 | 1 | 4.974481 | -1.011836 | -2.070492 |
| 60 | 6 | 5.080860 | 0.320935  | 0.363934  |
| 61 | 1 | 5.987903 | -0.176161 | 0.723154  |
| 62 | 1 | 5.360870 | 0.977623  | -0.467282 |
| 63 | 1 | 4.680755 | 0.930261  | 1.180066  |

**3** (E = -1617.4746871 au)

| Center Number | Atomic Number | Coordinates (Angstroms) |           |           |
|---------------|---------------|-------------------------|-----------|-----------|
|               |               | X                       | Y         | Z         |
| 1             | 77            | -0.957597               | 0.102480  | -0.120496 |
| 2             | 6             | -0.514585               | -2.161986 | -0.123860 |
| 3             | 6             | -0.756728               | -1.608605 | -1.463071 |
| 4             | 6             | -2.131425               | -1.161026 | -1.480519 |
| 5             | 6             | -2.674430               | -1.306461 | -0.155308 |
| 6             | 6             | -1.679465               | -1.982998 | 0.660163  |
| 7             | 6             | 0.690039                | -2.933080 | 0.297668  |
| 8             | 9             | 1.802498                | -2.658509 | -0.454520 |
| 9             | 9             | 0.477746                | -4.297055 | 0.178118  |
| 10            | 9             | 1.049268                | -2.726306 | 1.609422  |
| 11            | 6             | 0.117930                | -1.749412 | -2.679064 |
| 12            | 1             | -0.255681               | -1.126288 | -3.494134 |
| 13            | 1             | 1.150438                | -1.465654 | -2.477622 |
| 14            | 1             | 0.104892                | -2.793361 | -3.018495 |
| 15            | 6             | -2.889611               | -0.707961 | -2.694507 |
| 16            | 1             | -3.284738               | -1.589095 | -3.216120 |
| 17            | 1             | -3.736733               | -0.072322 | -2.427425 |
| 18            | 1             | -2.254993               | -0.158455 | -3.393318 |
| 19            | 6             | -4.098512               | -1.059012 | 0.264411  |
| 20            | 1             | -4.161618               | -0.783783 | 1.320319  |
| 21            | 1             | -4.555475               | -0.257646 | -0.320756 |
| 22            | 1             | -4.696685               | -1.967775 | 0.117095  |
| 23            | 6             | -1.925434               | -2.382753 | 2.085303  |
| 24            | 1             | -2.712300               | -3.146933 | 2.107992  |
| 25            | 1             | -1.036705               | -2.783524 | 2.569422  |
| 26            | 1             | -2.282100               | -1.529376 | 2.670532  |
| 27            | 8             | -0.979213               | 0.913920  | 1.935527  |
| 28            | 6             | -1.384012               | 1.961879  | 2.451505  |
| 29            | 8             | -1.849271               | 2.983930  | 1.766055  |
| 30            | 6             | -1.383289               | 2.158532  | 3.936634  |
| 31            | 1             | -0.963607               | 1.284661  | 4.432767  |
| 32            | 1             | -0.800699               | 3.049690  | 4.191395  |
| 33            | 1             | -2.408965               | 2.325553  | 4.282986  |
| 34            | 6             | 0.694856                | 2.473033  | -0.802578 |
| 35            | 7             | 0.798004                | 1.261668  | -0.324797 |
| 36            | 6             | -0.647141               | 2.775287  | -1.298824 |
| 37            | 6             | -0.920175               | 4.053178  | -2.062043 |
| 38            | 1             | -1.969240               | 4.086278  | -2.369597 |
| 39            | 1             | -0.716373               | 4.945341  | -1.457300 |
| 40            | 1             | -0.299688               | 4.119934  | -2.964358 |
| 41            | 6             | 1.807189                | 3.473029  | -0.846873 |
| 42            | 1             | 1.465283                | 4.426744  | -0.431461 |
| 43            | 1             | 2.688808                | 3.146905  | -0.299559 |
| 44            | 1             | 2.087094                | 3.658879  | -1.891332 |
| 45            | 6             | -1.564863               | 1.808587  | -1.027670 |
| 46            | 1             | -2.590781               | 1.945978  | -1.365358 |
| 47            | 1             | -1.787312               | 2.805205  | 0.800415  |

|    |   |          |           |           |
|----|---|----------|-----------|-----------|
| 48 | 8 | 2.004980 | 0.941647  | 0.338210  |
| 49 | 6 | 2.980143 | 0.362953  | -0.457330 |
| 50 | 8 | 2.829338 | 0.198056  | -1.636469 |
| 51 | 6 | 4.243987 | 0.066552  | 0.359560  |
| 52 | 6 | 3.908371 | -0.479642 | 1.768565  |
| 53 | 1 | 3.333893 | -1.408753 | 1.710169  |
| 54 | 1 | 4.844026 | -0.690144 | 2.297178  |
| 55 | 1 | 3.339111 | 0.244643  | 2.357645  |
| 56 | 6 | 5.098733 | -0.957459 | -0.420545 |
| 57 | 1 | 6.019780 | -1.152973 | 0.137943  |
| 58 | 1 | 4.566174 | -1.905778 | -0.546314 |
| 59 | 1 | 5.368130 | -0.579837 | -1.411020 |
| 60 | 6 | 5.026479 | 1.406857  | 0.491802  |
| 61 | 1 | 5.973133 | 1.212387  | 1.006740  |
| 62 | 1 | 5.254874 | 1.834990  | -0.490430 |
| 63 | 1 | 4.466341 | 2.141336  | 1.079454  |

**4** (E = -1388.306768 au)

| Center Number | Atomic Number | Coordinates (Angstroms) |           |           |
|---------------|---------------|-------------------------|-----------|-----------|
|               |               | X                       | Y         | Z         |
| 1             | 77            | 1.019165                | 0.455660  | -0.230537 |
| 2             | 6             | 0.983981                | -1.814055 | 0.160596  |
| 3             | 6             | 1.323338                | -0.983450 | 1.319731  |
| 4             | 6             | 2.604916                | -0.342623 | 1.013575  |
| 5             | 6             | 2.937083                | -0.648431 | -0.340181 |
| 6             | 6             | 1.948594                | -1.599047 | -0.846082 |
| 7             | 6             | 0.117639                | -2.817584 | 0.075595  |
| 8             | 9             | 1.065740                | -2.667769 | 1.050406  |
| 9             | 9             | 0.374135                | -4.104490 | 0.210065  |
| 10            | 9             | 0.786542                | -2.799060 | -1.127291 |
| 11            | 6             | 0.673813                | -0.993154 | 2.672373  |
| 12            | 1             | 1.050719                | -0.172443 | 3.285454  |
| 13            | 1             | 0.410434                | -0.903527 | 2.601484  |
| 14            | 1             | 0.909997                | -1.936246 | 3.182930  |
| 15            | 6             | 3.438704                | 0.440425  | 1.983249  |
| 16            | 1             | 4.023802                | -0.256542 | 2.596918  |
| 17            | 1             | 4.138492                | 1.101602  | 1.467602  |
| 18            | 1             | 2.824410                | 1.045708  | 2.654155  |
| 19            | 6             | 4.180340                | -0.240746 | -1.080761 |
| 20            | 1             | 3.984376                | -0.108824 | -2.148107 |
| 21            | 1             | 4.587287                | 0.696215  | -0.693730 |
| 22            | 1             | 4.950283                | -1.015764 | -0.973100 |
| 23            | 6             | 2.017972                | -2.199936 | -2.216513 |
| 24            | 1             | 2.881724                | -2.875992 | -2.263786 |
| 25            | 1             | 1.122511                | -2.762173 | -2.476608 |
| 26            | 1             | 2.174845                | -1.424019 | -2.972770 |
| 27            | 6             | 0.924711                | 2.656036  | -0.331799 |
| 28            | 7             | 0.895319                | 1.352556  | -0.281143 |
| 29            | 6             | 0.372883                | 3.287381  | -0.020633 |
| 30            | 6             | 0.463990                | 4.785994  | 0.157092  |
| 31            | 1             | 1.485628                | 5.064000  | 0.430611  |
| 32            | 1             | 0.203892                | 5.321873  | -0.764351 |
| 33            | 1             | 0.209208                | 5.144447  | 0.945888  |
| 34            | 6             | 2.142808                | 3.463258  | -0.639480 |
| 35            | 1             | 1.900377                | 4.224793  | -1.387914 |
| 36            | 1             | 2.968588                | 2.854828  | -1.001217 |
| 37            | 1             | 2.461668                | 3.996710  | 0.265377  |
| 38            | 6             | 1.398888                | 2.416200  | 0.110328  |
| 39            | 1             | 2.391485                | 2.785140  | 0.357435  |
| 40            | 8             | 2.081658                | 0.683866  | -0.659488 |

|    |   |          |           |           |
|----|---|----------|-----------|-----------|
| 41 | 6 | 2.825388 | 0.202942  | 0.407761  |
| 42 | 8 | 2.489951 | 0.373360  | 1.547330  |
| 43 | 6 | 4.118190 | -0.468489 | -0.070492 |
| 44 | 6 | 3.980984 | -1.099086 | -1.475570 |
| 45 | 1 | 3.199401 | -1.864513 | -1.495375 |
| 46 | 1 | 4.930495 | -1.574959 | -1.742129 |
| 47 | 1 | 3.751829 | -0.348472 | -2.237116 |
| 48 | 6 | 4.514371 | -1.548666 | 0.963786  |
| 49 | 1 | 5.468480 | -1.995277 | 0.665973  |
| 50 | 1 | 3.764143 | -2.344251 | 1.013317  |
| 51 | 1 | 4.629807 | -1.118836 | 1.962718  |
| 52 | 6 | 5.206124 | 0.646817  | -0.097817 |
| 53 | 1 | 6.167003 | 0.195652  | -0.366435 |
| 54 | 1 | 5.311886 | 1.121764  | 0.883266  |
| 55 | 1 | 4.974172 | 1.416753  | -0.841074 |

5a (E = -1852.0597123 au)

| Center Number | Atomic Number | Coordinates (Angstroms) |           |           |
|---------------|---------------|-------------------------|-----------|-----------|
|               |               | X                       | Y         | Z         |
| 1             | 77            | -0.518781               | -0.926970 | 0.036287  |
| 2             | 6             | -2.660428               | -0.742886 | -0.899270 |
| 3             | 6             | -2.741346               | -0.868097 | 0.558930  |
| 4             | 6             | -2.257452               | -2.172012 | 0.894515  |
| 5             | 6             | -1.779494               | -2.797867 | -0.303416 |
| 6             | 6             | -2.113450               | -1.935070 | -1.428765 |
| 7             | 6             | -3.299101               | 0.343310  | -1.698875 |
| 8             | 9             | -3.355089               | 1.543649  | -1.035737 |
| 9             | 9             | -4.609020               | 0.025818  | -2.016112 |
| 10            | 9             | -2.672844               | 0.592613  | -2.895472 |
| 11            | 6             | -3.455096               | 0.049566  | 1.513450  |
| 12            | 1             | -3.205659               | -0.198186 | 2.547042  |
| 13            | 1             | -3.211297               | 1.097070  | 1.348058  |
| 14            | 1             | -4.538543               | -0.077961 | 1.389119  |
| 15            | 6             | -2.307954               | -2.811441 | 2.252500  |
| 16            | 1             | -3.277273               | -3.312130 | 2.374000  |
| 17            | 1             | -1.528128               | -3.566475 | 2.373989  |
| 18            | 1             | -2.204628               | -2.080203 | 3.056653  |
| 19            | 6             | -1.321774               | -4.226543 | -0.420291 |
| 20            | 1             | -0.702333               | -4.388369 | -1.305184 |
| 21            | 1             | -0.748060               | -4.540294 | 0.454956  |
| 22            | 1             | -2.195744               | -4.885473 | -0.504378 |
| 23            | 6             | -2.025206               | -2.371293 | -2.863086 |
| 24            | 1             | -2.841902               | -3.080665 | -3.053142 |
| 25            | 1             | -2.125540               | -1.544415 | -3.564077 |
| 26            | 1             | -1.092684               | -2.900704 | -3.075265 |
| 27            | 6             | 0.721344                | 1.031711  | 1.870814  |
| 28            | 7             | 0.001943                | 0.961437  | 0.776697  |
| 29            | 6             | 0.987103                | -0.270346 | 2.455462  |
| 30            | 6             | 1.709678                | -0.408217 | 3.779232  |
| 31            | 1             | 1.769174                | -1.463485 | 4.061305  |
| 32            | 1             | 2.733076                | -0.015975 | 3.730275  |
| 33            | 1             | 1.187986                | 0.128375  | 4.580930  |
| 34            | 6             | 1.256690                | 2.304842  | 2.448759  |
| 35            | 1             | 2.227742                | 2.125321  | 2.915412  |
| 36            | 1             | 1.367097                | 3.086020  | 1.697095  |
| 37            | 1             | 0.576446                | 2.670492  | 3.228463  |
| 38            | 6             | 0.560828                | -1.308683 | 1.694606  |
| 39            | 1             | 0.749291                | -2.332459 | 2.009373  |
| 40            | 8             | -0.129474               | 2.139285  | 0.004571  |
| 41            | 6             | -1.069031               | 3.063014  | 0.433972  |

|    |   |           |           |           |
|----|---|-----------|-----------|-----------|
| 42 | 8 | -1.718962 | 2.903102  | 1.429905  |
| 43 | 6 | -1.077932 | 4.298019  | -0.476032 |
| 44 | 6 | -0.869484 | 3.931799  | -1.964934 |
| 45 | 1 | -1.641717 | 3.242525  | -2.319553 |
| 46 | 1 | -0.928115 | 4.846519  | -2.563999 |
| 47 | 1 | 0.109953  | 3.476932  | -2.135198 |
| 48 | 6 | -2.428841 | 5.025743  | -0.289479 |
| 49 | 1 | -2.431558 | 5.935476  | -0.898400 |
| 50 | 1 | -3.266591 | 4.397301  | -0.609497 |
| 51 | 1 | -2.588911 | 5.307674  | 0.754928  |
| 52 | 6 | 0.082782  | 5.221187  | 0.001206  |
| 53 | 1 | 0.065072  | 6.142580  | -0.590266 |
| 54 | 1 | -0.030156 | 5.491169  | 1.056795  |
| 55 | 1 | 1.058285  | 4.745278  | -0.142706 |
| 56 | 6 | 1.147938  | -1.871365 | -1.083422 |
| 57 | 1 | 1.843568  | -2.328856 | -0.389610 |
| 58 | 1 | 0.713923  | -2.554301 | -1.802523 |
| 59 | 6 | 1.298057  | -0.518727 | -1.425917 |
| 60 | 6 | 0.782022  | 0.029202  | -2.743028 |
| 61 | 1 | 0.021580  | -0.610409 | -3.191417 |
| 62 | 1 | 0.369457  | 1.033514  | -2.614811 |
| 63 | 1 | 1.614159  | 0.104218  | -3.456531 |
| 64 | 6 | 2.443986  | 0.273311  | -0.806060 |
| 65 | 1 | 2.217314  | 1.343663  | -0.823405 |
| 66 | 1 | 2.592407  | -0.019065 | 0.235645  |
| 67 | 6 | 3.760961  | 0.021673  | -1.571601 |
| 68 | 1 | 3.692074  | 0.339553  | -2.617914 |
| 69 | 1 | 3.997682  | -1.050574 | -1.591474 |
| 70 | 6 | 4.939661  | 0.742189  | -0.946525 |
| 71 | 8 | 4.914344  | 1.374646  | 0.101673  |
| 72 | 8 | 6.054386  | 0.593147  | -1.700206 |
| 73 | 6 | 7.294962  | 1.228519  | -1.204620 |
| 74 | 1 | 7.520079  | 0.809507  | -0.219965 |
| 75 | 1 | 7.106323  | 2.299962  | -1.095293 |
| 76 | 6 | 8.383512  | 0.934086  | -2.220427 |
| 77 | 1 | 9.323576  | 1.389074  | -1.890974 |
| 78 | 1 | 8.543583  | -0.143571 | -2.325328 |
| 79 | 1 | 8.128803  | 1.347580  | -3.201308 |

**5b** (E = -1852.0594236 au)

| Center Number | Atomic Number | Coordinates (Angstroms) |           |           |
|---------------|---------------|-------------------------|-----------|-----------|
|               |               | X                       | Y         | Z         |
| 1             | 77            | 1.304668                | -1.093336 | -0.640134 |
| 2             | 6             | 1.085212                | -1.321589 | 1.682856  |
| 3             | 6             | 2.410680                | -0.800548 | 1.334470  |
| 4             | 6             | 3.088853                | -1.833168 | 0.612037  |
| 5             | 6             | 2.174799                | -2.919593 | 0.411531  |
| 6             | 6             | 0.957165                | -2.627821 | 1.155000  |
| 7             | 6             | 0.134194                | -0.699058 | 2.650329  |
| 8             | 9             | 0.268420                | 0.662151  | 2.746673  |
| 9             | 9             | 0.332832                | -1.190804 | 3.929560  |
| 10            | 9             | -1.186438               | -0.939635 | 2.356948  |
| 11            | 6             | 3.069862                | 0.442575  | 1.867044  |
| 12            | 1             | 3.988015                | 0.660029  | 1.317271  |
| 13            | 1             | 2.424433                | 1.316866  | 1.809520  |
| 14            | 1             | 3.338657                | 0.280914  | 2.919275  |
| 15            | 6             | 4.531261                | -1.815875 | 0.193681  |
| 16            | 1             | 5.147148                | -2.188068 | 1.022530  |
| 17            | 1             | 4.710005                | -2.461885 | -0.668571 |
| 18            | 1             | 4.875709                | -0.810184 | -0.055952 |

|    |   |           |           |           |
|----|---|-----------|-----------|-----------|
| 19 | 6 | 2.524020  | -4.261330 | -0.173870 |
| 20 | 1 | 1.643265  | -4.787771 | -0.548749 |
| 21 | 1 | 3.238013  | -4.169577 | -0.995828 |
| 22 | 1 | 2.980667  | -4.891473 | 0.600331  |
| 23 | 6 | -0.119429 | -3.640306 | 1.420195  |
| 24 | 1 | 0.266381  | -4.362370 | 2.152273  |
| 25 | 1 | -1.025773 | -3.195601 | 1.828104  |
| 26 | 1 | -0.380794 | -4.209768 | 0.524203  |
| 27 | 6 | 1.670049  | 1.464293  | -2.079883 |
| 28 | 7 | 0.989142  | 0.926169  | -1.096964 |
| 29 | 6 | 2.631503  | 0.549233  | -2.666792 |
| 30 | 6 | 3.594809  | 0.998756  | -3.745325 |
| 31 | 1 | 4.264267  | 0.175403  | -4.011059 |
| 32 | 1 | 3.071623  | 1.312387  | -4.657375 |
| 33 | 1 | 4.211319  | 1.842033  | -3.411174 |
| 34 | 6 | 1.464203  | 2.860523  | -2.580478 |
| 35 | 1 | 1.655002  | 2.907753  | -3.654913 |
| 36 | 1 | 0.455185  | 3.223326  | -2.385275 |
| 37 | 1 | 2.173946  | 3.536835  | -2.087422 |
| 38 | 6 | 2.549184  | -0.713998 | -2.181353 |
| 39 | 1 | 3.189684  | -1.495528 | -2.583802 |
| 40 | 8 | -0.121691 | 1.648760  | -0.604241 |
| 41 | 6 | 0.144961  | 2.667374  | 0.296094  |
| 42 | 8 | 1.262273  | 2.966053  | 0.616224  |
| 43 | 6 | -1.149814 | 3.368592  | 0.726473  |
| 44 | 6 | -2.320505 | 2.373670  | 0.910678  |
| 45 | 1 | -2.084335 | 1.610807  | 1.658360  |
| 46 | 1 | -3.201650 | 2.925662  | 1.253890  |
| 47 | 1 | -2.576933 | 1.874750  | -0.027619 |
| 48 | 6 | -0.875883 | 4.120078  | 2.049138  |
| 49 | 1 | -1.781337 | 4.657798  | 2.348144  |
| 50 | 1 | -0.609469 | 3.425267  | 2.852428  |
| 51 | 1 | -0.064088 | 4.844130  | 1.936620  |
| 52 | 6 | -1.507543 | 4.392207  | -0.392058 |
| 53 | 1 | -2.395041 | 4.954498  | -0.083303 |
| 54 | 1 | -0.693017 | 5.105785  | -0.557804 |
| 55 | 1 | -1.737705 | 3.888725  | -1.336711 |
| 56 | 6 | 0.244544  | -2.445278 | -2.048091 |
| 57 | 1 | 0.043175  | -3.367741 | -1.517627 |
| 58 | 1 | 0.827263  | -2.561061 | -2.954301 |
| 59 | 6 | -0.662387 | -1.380333 | -1.937651 |
| 60 | 6 | -0.804133 | -0.404101 | -3.089736 |
| 61 | 1 | 0.136503  | -0.254994 | -3.622449 |
| 62 | 1 | -1.521676 | -0.822448 | -3.808244 |
| 63 | 1 | -1.194741 | 0.562657  | -2.760800 |
| 64 | 6 | -1.876043 | -1.485745 | -1.022533 |
| 65 | 1 | -1.661610 | -2.146624 | -0.181774 |
| 66 | 1 | -2.110004 | -0.501969 | -0.603918 |
| 67 | 6 | -3.112361 | -2.031396 | -1.769952 |
| 68 | 1 | -2.872360 | -2.972225 | -2.282820 |
| 69 | 1 | -3.455835 | -1.336932 | -2.545550 |
| 70 | 6 | -4.279000 | -2.292051 | -0.836422 |
| 71 | 8 | -4.280529 | -2.098649 | 0.372479  |
| 72 | 8 | -5.346070 | -2.777942 | -1.514030 |
| 73 | 6 | -6.561206 | -3.082599 | -0.726762 |
| 74 | 1 | -6.884813 | -2.161824 | -0.233798 |
| 75 | 1 | -6.293563 | -3.815218 | 0.039524  |
| 76 | 6 | -7.600688 | -3.614846 | -1.696036 |
| 77 | 1 | -8.520128 | -3.852707 | -1.150678 |
| 78 | 1 | -7.840636 | -2.872271 | -2.463406 |
| 79 | 1 | -7.249528 | -4.527136 | -2.188330 |

5c (E = -1852.0610187 au)

| Center Number | Atomic Number | Coordinates (Angstroms) |           |           |
|---------------|---------------|-------------------------|-----------|-----------|
|               |               | X                       | Y         | Z         |
| 1             | 77            | 1.187152                | -0.561754 | -0.011759 |
| 2             | 6             | 2.778788                | 0.494902  | 1.236024  |
| 3             | 6             | 3.215911                | 0.453783  | -0.152422 |
| 4             | 6             | 3.396872                | -0.928412 | -0.486258 |
| 5             | 6             | 3.040281                | -1.736524 | 0.652077  |
| 6             | 6             | 2.712803                | -0.845853 | 1.736547  |
| 7             | 6             | 2.680897                | 1.715527  | 2.087620  |
| 8             | 9             | 2.475900                | 2.864053  | 1.370111  |
| 9             | 9             | 3.846068                | 1.918813  | 2.808010  |
| 10            | 9             | 1.671762                | 1.653100  | 3.021095  |
| 11            | 6             | 3.615352                | 1.610618  | -1.026397 |
| 12            | 1             | 3.757326                | 1.283069  | -2.058024 |
| 13            | 1             | 2.876500                | 2.410560  | -1.020048 |
| 14            | 1             | 4.569334                | 2.018895  | -0.668759 |
| 15            | 6             | 3.974988                | -1.453087 | -1.769175 |
| 16            | 1             | 5.070410                | -1.433669 | -1.699618 |
| 17            | 1             | 3.673030                | -2.486145 | -1.954669 |
| 18            | 1             | 3.681232                | -0.850217 | -2.631089 |
| 19            | 6             | 3.282873                | -3.217290 | 0.766569  |
| 20            | 1             | 2.769882                | -3.652413 | 1.625563  |
| 21            | 1             | 2.959137                | -3.755049 | -0.128049 |
| 22            | 1             | 4.357695                | -3.398886 | 0.895102  |
| 23            | 6             | 2.504863                | -1.273763 | 3.161337  |
| 24            | 1             | 3.489563                | -1.356465 | 3.640259  |
| 25            | 1             | 1.914534                | -0.559845 | 3.735094  |
| 26            | 1             | 2.031353                | -2.255427 | 3.227513  |
| 27            | 6             | -0.440645               | 0.644891  | -2.169475 |
| 28            | 7             | -0.021848               | 0.864767  | -0.946626 |
| 29            | 6             | 0.068211                | -0.595328 | -2.725785 |
| 30            | 6             | -0.220874               | -0.993437 | -4.158036 |
| 31            | 1             | 0.277801                | -1.939736 | -4.387583 |
| 32            | 1             | -1.294832               | -1.128360 | -4.337627 |
| 33            | 1             | 0.140994                | -0.239427 | -4.867703 |
| 34            | 6             | -1.377671               | 1.547563  | -2.910731 |
| 35            | 1             | -2.040583               | 0.959628  | -3.549795 |
| 36            | 1             | -1.983156               | 2.155170  | -2.238748 |
| 37            | 1             | -0.802867               | 2.219528  | -3.560884 |
| 38            | 6             | 0.754423                | -1.350960 | -1.834347 |
| 39            | 1             | 1.123952                | -2.331186 | -2.125959 |
| 40            | 8             | -0.612775               | 1.933663  | -0.238173 |
| 41            | 6             | -0.103903               | 3.198944  | -0.487256 |
| 42            | 8             | 0.756531                | 3.395720  | -1.299614 |
| 43            | 6             | -0.844761               | 4.251423  | 0.346222  |
| 44            | 6             | -1.087706               | 3.767270  | 1.796999  |
| 45            | 1             | -0.145815               | 3.537262  | 2.304123  |
| 46            | 1             | -1.589841               | 4.564207  | 2.355391  |
| 47            | 1             | -1.723814               | 2.878384  | 1.825470  |
| 48            | 6             | -0.003124               | 5.546972  | 0.350020  |
| 49            | 1             | -0.535876               | 6.317534  | 0.916275  |
| 50            | 1             | 0.971448                | 5.385971  | 0.822447  |
| 51            | 1             | 0.163764                | 5.917230  | -0.665502 |
| 52            | 6             | -2.211156               | 4.516596  | -0.352405 |
| 53            | 1             | -2.736961               | 5.307933  | 0.192053  |
| 54            | 1             | -2.072999               | 4.850082  | -1.386778 |
| 55            | 1             | -2.843762               | 3.623268  | -0.347839 |
| 56            | 6             | -0.467575               | -0.784183 | 1.440936  |
| 57            | 1             | -1.113030               | 0.082568  | 1.361647  |
| 58            | 1             | -0.016485               | -0.928751 | 2.414512  |
| 59            | 6             | -0.706911               | -1.902122 | 0.625586  |

|    |   |           |           |           |
|----|---|-----------|-----------|-----------|
| 60 | 6 | -0.244556 | -3.286670 | 1.032780  |
| 61 | 1 | 0.501058  | -3.256076 | 1.828325  |
| 62 | 1 | -1.103589 | -3.857505 | 1.410058  |
| 63 | 1 | 0.162950  | -3.843209 | 0.183150  |
| 64 | 6 | -1.882334 | -1.881121 | -0.343199 |
| 65 | 1 | -1.999669 | -0.892083 | -0.787766 |
| 66 | 1 | -1.715219 | -2.588122 | -1.161684 |
| 67 | 6 | -3.198958 | -2.238730 | 0.380911  |
| 68 | 1 | -3.373525 | -1.557680 | 1.224681  |
| 69 | 1 | -3.174029 | -3.249788 | 0.802238  |
| 70 | 6 | -4.400268 | -2.151027 | -0.541077 |
| 71 | 8 | -4.382594 | -1.745234 | -1.696228 |
| 72 | 8 | -5.523757 | -2.577384 | 0.081799  |
| 73 | 6 | -6.782962 | -2.532652 | -0.693891 |
| 74 | 1 | -6.657447 | -3.163460 | -1.578159 |
| 75 | 1 | -6.944675 | -1.501196 | -1.018707 |
| 76 | 6 | -7.888345 | -3.030776 | 0.218871  |
| 77 | 1 | -8.841602 | -3.014834 | -0.320033 |
| 78 | 1 | -7.697202 | -4.057895 | 0.545089  |
| 79 | 1 | -7.985079 | -2.394033 | 1.103801  |

**5d** (E = -1852.0610561 au)

| Center Number | Atomic Number | Coordinates (Angstroms) |           |           |
|---------------|---------------|-------------------------|-----------|-----------|
|               |               | X                       | Y         | Z         |
| 1             | 77            | 0.120721                | 0.267508  | 0.725311  |
| 2             | 6             | 1.047721                | 2.155427  | -0.161838 |
| 3             | 6             | 1.490206                | 2.023888  | 1.217332  |
| 4             | 6             | 0.321976                | 2.133665  | 2.038856  |
| 5             | 6             | -0.833723               | 2.296149  | 1.192034  |
| 6             | 6             | -0.372510               | 2.362837  | -0.170085 |
| 7             | 6             | 1.933332                | 2.319820  | -1.350668 |
| 8             | 9             | 3.173463                | 1.758969  | -1.187747 |
| 9             | 9             | 2.154221                | 3.657581  | -1.632847 |
| 10            | 9             | 1.410703                | 1.777622  | -2.502304 |
| 11            | 6             | 2.901410                | 1.993550  | 1.733957  |
| 12            | 1             | 2.921931                | 1.690955  | 2.782638  |
| 13            | 1             | 3.537277                | 1.314334  | 1.169482  |
| 14            | 1             | 3.327228                | 3.003305  | 1.666613  |
| 15            | 6             | 0.308296                | 2.201928  | 3.538886  |
| 16            | 1             | 0.476809                | 3.242047  | 3.847307  |
| 17            | 1             | -0.653191               | 1.886720  | 3.949910  |
| 18            | 1             | 1.091502                | 1.587027  | 3.987113  |
| 19            | 6             | -2.215133               | 2.639422  | 1.680417  |
| 20            | 1             | -2.969734               | 2.523418  | 0.901157  |
| 21            | 1             | -2.511942               | 2.019395  | 2.530187  |
| 22            | 1             | -2.233741               | 3.686891  | 2.008181  |
| 23            | 6             | -1.226004               | 2.753372  | -1.342986 |
| 24            | 1             | -1.250509               | 3.849946  | -1.395937 |
| 25            | 1             | -0.837674               | 2.383495  | -2.291599 |
| 26            | 1             | -2.257320               | 2.413838  | -1.228468 |
| 27            | 6             | 1.537806                | -2.140758 | 1.697046  |
| 28            | 7             | 1.503525                | -1.298179 | 0.693583  |
| 29            | 6             | 0.587735                | -1.810498 | 2.744726  |
| 30            | 6             | 0.529709                | -2.604218 | 4.033328  |
| 31            | 1             | -0.227625               | -2.177558 | 4.697455  |
| 32            | 1             | 0.267562                | -3.655157 | 3.857915  |
| 33            | 1             | 1.490890                | -2.587641 | 4.561422  |
| 34            | 6             | 2.429018                | -3.342813 | 1.753255  |
| 35            | 1             | 1.915698                | -4.170282 | 2.249038  |
| 36            | 1             | 2.749867                | -3.667527 | 0.763924  |

|    |   |           |           |           |
|----|---|-----------|-----------|-----------|
| 37 | 1 | 3.322281  | -3.107151 | 2.346032  |
| 38 | 6 | -0.243266 | -0.789203 | 2.423650  |
| 39 | 1 | -1.040979 | -0.498781 | 3.103139  |
| 40 | 8 | 2.218298  | -1.644252 | -0.474648 |
| 41 | 6 | 3.568345  | -1.333778 | -0.493690 |
| 42 | 8 | 4.131765  | -0.861120 | 0.454028  |
| 43 | 6 | 4.198202  | -1.752029 | -1.828008 |
| 44 | 6 | 3.268429  | -1.442719 | -3.027021 |
| 45 | 1 | 3.030415  | -0.376143 | -3.083300 |
| 46 | 1 | 3.780399  | -1.726602 | -3.952456 |
| 47 | 1 | 2.332755  | -2.005696 | -2.969278 |
| 48 | 6 | 5.540463  | -1.002962 | -1.987498 |
| 49 | 1 | 6.018220  | -1.321854 | -2.919391 |
| 50 | 1 | 5.387715  | 0.080303  | -2.033849 |
| 51 | 1 | 6.219731  | -1.219964 | -1.158247 |
| 52 | 6 | 4.459944  | -3.285454 | -1.751071 |
| 53 | 1 | 4.963992  | -3.603054 | -2.669882 |
| 54 | 1 | 5.106391  | -3.538100 | -0.903499 |
| 55 | 1 | 3.524423  | -3.847645 | -1.666396 |
| 56 | 6 | -0.761039 | -0.659314 | -1.080181 |
| 57 | 1 | -1.098005 | 0.152222  | -1.712556 |
| 58 | 1 | -0.022713 | -1.311612 | -1.530244 |
| 59 | 6 | -1.625177 | -1.170689 | -0.098572 |
| 60 | 6 | -1.518192 | -2.628931 | 0.298843  |
| 61 | 1 | -0.497699 | -3.005595 | 0.224999  |
| 62 | 1 | -1.897232 | -2.812445 | 1.307557  |
| 63 | 1 | -2.128891 | -3.215967 | -0.400297 |
| 64 | 6 | -2.974364 | -0.520548 | 0.173537  |
| 65 | 1 | -3.172803 | -0.514256 | 1.251489  |
| 66 | 1 | -2.964202 | 0.518135  | -0.158940 |
| 67 | 6 | -4.130022 | -1.250220 | -0.545062 |
| 68 | 1 | -4.266445 | -2.268635 | -0.167842 |
| 69 | 1 | -3.919443 | -1.341408 | -1.619928 |
| 70 | 6 | -5.447936 | -0.514208 | -0.395852 |
| 71 | 8 | -5.581629 | 0.622917  | 0.038695  |
| 72 | 8 | -6.482348 | -1.275499 | -0.821915 |
| 73 | 6 | -7.832359 | -0.672256 | -0.764521 |
| 74 | 1 | -7.825573 | 0.231473  | -1.380123 |
| 75 | 1 | -8.032321 | -0.389004 | 0.272430  |
| 76 | 6 | -8.809560 | -1.713921 | -1.277400 |
| 77 | 1 | -9.825264 | -1.305302 | -1.251500 |
| 78 | 1 | -8.580325 | -1.995074 | -2.310018 |
| 79 | 1 | -8.787487 | -2.614434 | -0.655665 |

**TS5a-6a** (E = -1852.0144399 au)

| Center Number | Atomic Number | Coordinates (Angstroms) |           |           |
|---------------|---------------|-------------------------|-----------|-----------|
|               |               | X                       | Y         | Z         |
| 1             | 77            | -0.517421               | -0.906790 | 0.053775  |
| 2             | 6             | -2.271275               | -0.454542 | -1.125078 |
| 3             | 6             | -2.864539               | -0.702941 | 0.205275  |
| 4             | 6             | -2.576017               | -2.035527 | 0.528927  |
| 5             | 6             | -1.840566               | -2.645743 | -0.577638 |
| 6             | 6             | -1.767482               | -1.701683 | -1.650752 |
| 7             | 6             | -2.555525               | 0.745301  | -1.966872 |
| 8             | 9             | -2.707981               | 1.896706  | -1.236999 |
| 9             | 9             | -3.734628               | 0.586491  | -2.676044 |
| 10            | 9             | -1.583546               | 1.001883  | -2.901200 |
| 11            | 6             | -3.677663               | 0.262832  | 1.020305  |
| 12            | 1             | -3.887286               | -0.147257 | 2.010422  |
| 13            | 1             | -3.175933               | 1.222864  | 1.146795  |

|    |   |           |           |           |
|----|---|-----------|-----------|-----------|
| 14 | 1 | -4.638653 | 0.446552  | 0.522593  |
| 15 | 6 | -2.973157 | -2.769603 | 1.777313  |
| 16 | 1 | -3.867427 | -3.374577 | 1.577806  |
| 17 | 1 | -2.187533 | -3.452708 | 2.111245  |
| 18 | 1 | -3.204462 | -2.088380 | 2.598591  |
| 19 | 6 | -1.524924 | -4.114303 | -0.656210 |
| 20 | 1 | -0.850799 | -4.348206 | -1.482012 |
| 21 | 1 | -1.070445 | -4.479925 | 0.268727  |
| 22 | 1 | -2.453268 | -4.678727 | -0.814189 |
| 23 | 6 | -1.414662 | -2.000159 | -3.081094 |
| 24 | 1 | -2.347299 | -2.103358 | -3.651262 |
| 25 | 1 | -0.826487 | -1.207129 | -3.543678 |
| 26 | 1 | -0.868909 | -2.939525 | -3.171850 |
| 27 | 6 | 0.492888  | 0.692034  | 2.363783  |
| 28 | 7 | 0.109185  | 0.803028  | 1.110839  |
| 29 | 6 | 0.419271  | -0.668993 | 2.847205  |
| 30 | 6 | 0.313336  | -0.969468 | 4.320452  |
| 31 | 1 | 0.095037  | -2.029308 | 4.476674  |
| 32 | 1 | 1.254503  | -0.742749 | 4.840469  |
| 33 | 1 | -0.474441 | -0.377640 | 4.800964  |
| 34 | 6 | 0.960090  | 1.837127  | 3.210721  |
| 35 | 1 | 1.646079  | 1.484192  | 3.983259  |
| 36 | 1 | 1.464832  | 2.596822  | 2.611220  |
| 37 | 1 | 0.104400  | 2.310329  | 3.708065  |
| 38 | 6 | 0.437379  | -1.636235 | 1.865538  |
| 39 | 1 | 0.295943  | -2.668007 | 2.162907  |
| 40 | 8 | 0.308011  | 2.063167  | 0.498568  |
| 41 | 6 | -0.643030 | 3.036207  | 0.762575  |
| 42 | 8 | -1.555595 | 2.852347  | 1.519681  |
| 43 | 6 | -0.300834 | 4.336222  | 0.025145  |
| 44 | 6 | 0.143673  | 4.066441  | -1.433768 |
| 45 | 1 | -0.641828 | 3.558639  | -2.001750 |
| 46 | 1 | 0.351282  | 5.024900  | -1.920960 |
| 47 | 1 | 1.051749  | 3.459347  | -1.474110 |
| 48 | 6 | -1.548818 | 5.246487  | 0.042736  |
| 49 | 1 | -1.307510 | 6.192812  | -0.451761 |
| 50 | 1 | -2.385686 | 4.784422  | -0.491263 |
| 51 | 1 | -1.870943 | 5.462697  | 1.065416  |
| 52 | 6 | 0.859120  | 5.019525  | 0.807758  |
| 53 | 1 | 1.087709  | 5.978610  | 0.331444  |
| 54 | 1 | 0.577971  | 5.214697  | 1.848544  |
| 55 | 1 | 1.766311  | 4.407557  | 0.792639  |
| 56 | 6 | 1.704048  | -1.579036 | 0.671528  |
| 57 | 1 | 2.401805  | -0.918955 | 1.175485  |
| 58 | 1 | 2.000635  | -2.622314 | 0.743835  |
| 59 | 6 | 1.457250  | -1.150470 | -0.748044 |
| 60 | 6 | 1.607289  | -2.285377 | -1.761947 |
| 61 | 1 | 1.024339  | -3.165460 | -1.482456 |
| 62 | 1 | 1.313100  | -1.964795 | -2.764730 |
| 63 | 1 | 2.658871  | -2.600203 | -1.815506 |
| 64 | 6 | 2.185408  | 0.125578  | -1.197208 |
| 65 | 1 | 1.679534  | 0.521146  | -2.087290 |
| 66 | 1 | 2.121757  | 0.896516  | -0.428845 |
| 67 | 6 | 3.682764  | -0.097095 | -1.530290 |
| 68 | 1 | 3.818205  | -0.701860 | -2.429174 |
| 69 | 1 | 4.175289  | -0.632136 | -0.704271 |
| 70 | 6 | 4.424197  | 1.212377  | -1.711962 |
| 71 | 8 | 4.245380  | 2.222992  | -1.041803 |
| 72 | 8 | 5.344210  | 1.134763  | -2.702816 |
| 73 | 6 | 6.172078  | 2.335470  | -2.949227 |
| 74 | 1 | 6.708989  | 2.572031  | -2.026371 |
| 75 | 1 | 5.501587  | 3.165822  | -3.186897 |
| 76 | 6 | 7.110459  | 2.004310  | -4.095246 |

|    |   |          |          |           |
|----|---|----------|----------|-----------|
| 77 | 1 | 7.744376 | 2.870982 | -4.310658 |
| 78 | 1 | 7.759749 | 1.160457 | -3.841646 |
| 79 | 1 | 6.551332 | 1.755884 | -5.002817 |

**TS5b-6b** (E = -1852.0140106 au)

| Center Number | Atomic Number | Coordinates (Angstroms) |           |           |
|---------------|---------------|-------------------------|-----------|-----------|
|               |               | X                       | Y         | Z         |
| 1             | 77            | 0.646079                | -0.763827 | -0.287839 |
| 2             | 6             | 0.910579                | -0.806325 | 1.853790  |
| 3             | 6             | 2.311287                | -0.747551 | 1.386542  |
| 4             | 6             | 2.532347                | -1.910762 | 0.636620  |
| 5             | 6             | 1.314302                | -2.720840 | 0.645574  |
| 6             | 6             | 0.360839                | -2.098289 | 1.511628  |
| 7             | 6             | 0.309824                | 0.094164  | 2.882589  |
| 8             | 9             | 0.834700                | 1.360788  | 2.871063  |
| 9             | 9             | 0.523771                | -0.395011 | 4.160735  |
| 10            | 9             | -1.050927               | 0.235318  | 2.755579  |
| 11            | 6             | 3.324221                | 0.311639  | 1.717047  |
| 12            | 1             | 4.242888                | 0.161783  | 1.146217  |
| 13            | 1             | 2.955530                | 1.317422  | 1.514560  |
| 14            | 1             | 3.577877                | 0.253643  | 2.783632  |
| 15            | 6             | 3.808148                | -2.315856 | -0.044649 |
| 16            | 1             | 4.347922                | -3.035348 | 0.584861  |
| 17            | 1             | 3.617910                | -2.803391 | -1.004546 |
| 18            | 1             | 4.466517                | -1.463188 | -0.221610 |
| 19            | 6             | 1.231385                | -4.115329 | 0.088264  |
| 20            | 1             | 0.200682                | -4.464832 | 0.003760  |
| 21            | 1             | 1.695656                | -4.183386 | -0.899468 |
| 22            | 1             | 1.766114                | -4.806616 | 0.752998  |
| 23            | 6             | -0.852217               | -2.748753 | 2.114432  |
| 24            | 1             | -0.567651               | -3.146177 | 3.097902  |
| 25            | 1             | -1.675491               | -2.049443 | 2.263521  |
| 26            | 1             | -1.205439               | -3.586312 | 1.512474  |
| 27            | 6             | 1.448972                | 1.423753  | -2.156964 |
| 28            | 7             | 0.797939                | 1.202612  | -1.036698 |
| 29            | 6             | 2.001686                | 0.213885  | -2.726507 |
| 30            | 6             | 3.179043                | 0.262083  | -3.666862 |
| 31            | 1             | 3.554281                | -0.747137 | -3.856822 |
| 32            | 1             | 2.896358                | 0.700224  | -4.634146 |
| 33            | 1             | 3.999143                | 0.867454  | -3.263497 |
| 34            | 6             | 1.614678                | 2.772137  | -2.789907 |
| 35            | 1             | 1.723018                | 2.673039  | -3.871954 |
| 36            | 1             | 0.763392                | 3.420981  | -2.578732 |
| 37            | 1             | 2.518450                | 3.259481  | -2.403460 |
| 38            | 6             | 1.385918                | -0.952224 | -2.328420 |
| 39            | 1             | 1.817139                | -1.891507 | -2.651708 |
| 40            | 8             | 0.081147                | 2.297962  | -0.499184 |
| 41            | 6             | 0.809097                | 3.199990  | 0.259954  |
| 42            | 8             | 1.997965                | 3.111245  | 0.396008  |
| 43            | 6             | -0.102922               | 4.307858  | 0.800715  |
| 44            | 6             | -1.439365               | 3.736310  | 1.335165  |
| 45            | 1             | -1.269868               | 3.012183  | 2.137822  |
| 46            | 1             | -2.037745               | 4.559607  | 1.739261  |
| 47            | 1             | -2.015986               | 3.250264  | 0.543744  |
| 48            | 6             | 0.649257                | 5.048050  | 1.929031  |
| 49            | 1             | 0.020236                | 5.862837  | 2.301684  |
| 50            | 1             | 0.871997                | 4.377117  | 2.765137  |
| 51            | 1             | 1.590202                | 5.474287  | 1.569513  |
| 52            | 6             | -0.385175               | 5.290819  | -0.373481 |

|    |   |           |           |           |
|----|---|-----------|-----------|-----------|
| 53 | 1 | -0.989097 | 6.123196  | 0.002483  |
| 54 | 1 | 0.544577  | 5.702241  | -0.781792 |
| 55 | 1 | -0.942894 | 4.803009  | -1.179197 |
| 56 | 6 | -0.341378 | -1.079527 | -2.457535 |
| 57 | 1 | -0.373499 | -2.068646 | -2.906375 |
| 58 | 1 | -0.528062 | -0.296744 | -3.185051 |
| 59 | 6 | -1.254147 | -0.959852 | -1.266463 |
| 60 | 6 | -2.191188 | 0.249029  | -1.262683 |
| 61 | 1 | -1.692771 | 1.174855  | -1.546529 |
| 62 | 1 | -3.019924 | 0.090744  | -1.967090 |
| 63 | 1 | -2.625345 | 0.388236  | -0.266230 |
| 64 | 6 | -1.997052 | -2.258000 | -0.921904 |
| 65 | 1 | -1.291250 | -3.091060 | -0.880567 |
| 66 | 1 | -2.449261 | -2.159263 | 0.069616  |
| 67 | 6 | -3.110447 | -2.631542 | -1.928015 |
| 68 | 1 | -2.729532 | -2.597132 | -2.959733 |
| 69 | 1 | -3.953516 | -1.936784 | -1.885775 |
| 70 | 6 | -3.639567 | -4.034384 | -1.697205 |
| 71 | 8 | -3.036794 | -4.935803 | -1.126660 |
| 72 | 8 | -4.875875 | -4.189642 | -2.227231 |
| 73 | 6 | -5.492026 | -5.530126 | -2.117074 |
| 74 | 1 | -5.547096 | -5.790973 | -1.056709 |
| 75 | 1 | -4.836844 | -6.246473 | -2.620504 |
| 76 | 6 | -6.862948 | -5.447750 | -2.762930 |
| 77 | 1 | -7.354539 | -6.424462 | -2.701453 |
| 78 | 1 | -7.495152 | -4.714344 | -2.252615 |
| 79 | 1 | -6.785747 | -5.169753 | -3.818730 |

**TS5c-6c** (E = -1852.0210572 au)

| Center Number | Atomic Number | Coordinates (Angstroms) |           |           |
|---------------|---------------|-------------------------|-----------|-----------|
|               |               | X                       | Y         | Z         |
| 1             | 77            | 1.292075                | -0.436370 | 0.140376  |
| 2             | 6             | 2.740294                | 0.557119  | 1.419413  |
| 3             | 6             | 3.368841                | 0.612587  | 0.085873  |
| 4             | 6             | 3.587040                | -0.715342 | -0.325048 |
| 5             | 6             | 3.126880                | -1.609544 | 0.730681  |
| 6             | 6             | 2.681336                | -0.823864 | 1.842606  |
| 7             | 6             | 2.559954                | 1.733161  | 2.316085  |
| 8             | 9             | 2.241837                | 2.887180  | 1.640766  |
| 9             | 9             | 3.724016                | 2.016853  | 3.014711  |
| 10            | 9             | 1.585074                | 1.561052  | 3.267831  |
| 11            | 6             | 3.798217                | 1.849241  | -0.651932 |
| 12            | 1             | 4.077021                | 1.610647  | -1.680359 |
| 13            | 1             | 3.019794                | 2.611443  | -0.677687 |
| 14            | 1             | 4.678208                | 2.280037  | -0.155936 |
| 15            | 6             | 4.239875                | -1.169811 | -1.600555 |
| 16            | 1             | 5.303636                | -1.374885 | -1.421855 |
| 17            | 1             | 3.787148                | -2.090341 | -1.979259 |
| 18            | 1             | 4.171105                | -0.412699 | -2.384691 |
| 19            | 6             | 3.353868                | -3.095385 | 0.732353  |
| 20            | 1             | 2.764828                | -3.602107 | 1.499205  |
| 21            | 1             | 3.122453                | -3.545820 | -0.236750 |
| 22            | 1             | 4.413161                | -3.295750 | 0.941300  |
| 23            | 6             | 2.322391                | -1.355546 | 3.202949  |
| 24            | 1             | 3.211435                | -1.326898 | 3.845918  |
| 25            | 1             | 1.540089                | -0.767660 | 3.683346  |
| 26            | 1             | 1.987914                | -2.393868 | 3.145968  |
| 27            | 6             | -0.425473               | 0.484514  | -2.105608 |
| 28            | 7             | 0.020876                | 0.832035  | -0.924826 |
| 29            | 6             | 0.075504                | -0.820736 | -2.509654 |

|    |   |           |           |           |
|----|---|-----------|-----------|-----------|
| 30 | 6 | 0.160166  | -1.191838 | -3.964770 |
| 31 | 1 | 0.691083  | -2.138716 | -4.088186 |
| 32 | 1 | -0.842625 | -1.308144 | -4.398933 |
| 33 | 1 | 0.675839  | -0.419558 | -4.547746 |
| 34 | 6 | -1.351292 | 1.308652  | -2.947265 |
| 35 | 1 | -1.948204 | 0.670369  | -3.601564 |
| 36 | 1 | -2.022532 | 1.911067  | -2.333941 |
| 37 | 1 | -0.767026 | 1.987694  | -3.581622 |
| 38 | 6 | 0.465201  | -1.641111 | -1.473013 |
| 39 | 1 | 0.918201  | -2.587080 | -1.744997 |
| 40 | 8 | -0.608561 | 1.947676  | -0.327673 |
| 41 | 6 | -0.065285 | 3.187380  | -0.627159 |
| 42 | 8 | 0.833935  | 3.315312  | -1.410894 |
| 43 | 6 | -0.820712 | 4.300257  | 0.107420  |
| 44 | 6 | -1.161196 | 3.900549  | 1.564268  |
| 45 | 1 | -0.256433 | 3.680458  | 2.138984  |
| 46 | 1 | -1.677152 | 4.737098  | 2.046910  |
| 47 | 1 | -1.818537 | 3.027591  | 1.601079  |
| 48 | 6 | 0.057293  | 5.571547  | 0.092974  |
| 49 | 1 | -0.484578 | 6.385110  | 0.585594  |
| 50 | 1 | 0.997540  | 5.410766  | 0.630620  |
| 51 | 1 | 0.293234  | 5.881637  | -0.928990 |
| 52 | 6 | -2.136005 | 4.562336  | -0.684815 |
| 53 | 1 | -2.664867 | 5.400833  | -0.219830 |
| 54 | 1 | -1.928262 | 4.826379  | -1.727532 |
| 55 | 1 | -2.797632 | 3.690471  | -0.663291 |
| 56 | 6 | -0.455476 | -1.147231 | 1.062828  |
| 57 | 1 | -1.203083 | -0.374329 | 1.228701  |
| 58 | 1 | -0.211689 | -1.671360 | 1.983475  |
| 59 | 6 | -0.714498 | -2.031105 | -0.112179 |
| 60 | 6 | -0.387057 | -3.508856 | 0.128958  |
| 61 | 1 | 0.644074  | -3.645949 | 0.458042  |
| 62 | 1 | -1.040983 | -3.887430 | 0.922584  |
| 63 | 1 | -0.555497 | -4.110377 | -0.769822 |
| 64 | 6 | -2.107597 | -1.826915 | -0.751766 |
| 65 | 1 | -2.281239 | -0.764812 | -0.937017 |
| 66 | 1 | -2.148222 | -2.345674 | -1.715707 |
| 67 | 6 | -3.236882 | -2.340511 | 0.162280  |
| 68 | 1 | -3.118102 | -1.955565 | 1.184511  |
| 69 | 1 | -3.234366 | -3.432021 | 0.239727  |
| 70 | 6 | -4.606790 | -1.906609 | -0.326251 |
| 71 | 8 | -4.821796 | -1.040319 | -1.164735 |
| 72 | 8 | -5.587031 | -2.594357 | 0.302955  |
| 73 | 6 | -6.983600 | -2.248167 | -0.043294 |
| 74 | 1 | -7.115534 | -2.411011 | -1.116373 |
| 75 | 1 | -7.132305 | -1.186496 | 0.171790  |
| 76 | 6 | -7.884776 | -3.139228 | 0.791523  |
| 77 | 1 | -8.932173 | -2.915373 | 0.563141  |
| 78 | 1 | -7.705587 | -4.196513 | 0.572515  |
| 79 | 1 | -7.724425 | -2.970641 | 1.860995  |

**TS5d-6d** (E = -1852.0202435 au)

| Center Number | Atomic Number | Coordinates (Angstroms) |          |           |
|---------------|---------------|-------------------------|----------|-----------|
|               |               | X                       | Y        | Z         |
| 1             | 77            | 0.201235                | 0.408490 | 0.554309  |
| 2             | 6             | 1.094957                | 2.220368 | -0.241417 |
| 3             | 6             | 1.572397                | 2.198100 | 1.155398  |
| 4             | 6             | 0.436711                | 2.276127 | 1.979925  |
| 5             | 6             | -0.748960               | 2.366966 | 1.133592  |
| 6             | 6             | -0.336254               | 2.421523 | -0.237084 |

|    |   |           |           |           |
|----|---|-----------|-----------|-----------|
| 7  | 6 | 1.973778  | 2.393085  | -1.433230 |
| 8  | 9 | 3.198193  | 1.785178  | -1.298203 |
| 9  | 9 | 2.242634  | 3.732887  | -1.669236 |
| 10 | 9 | 1.429487  | 1.910229  | -2.598394 |
| 11 | 6 | 3.003815  | 2.196229  | 1.611671  |
| 12 | 1 | 3.066673  | 2.040700  | 2.690657  |
| 13 | 1 | 3.595000  | 1.424452  | 1.118777  |
| 14 | 1 | 3.459627  | 3.168873  | 1.384390  |
| 15 | 6 | 0.412915  | 2.321072  | 3.482380  |
| 16 | 1 | 0.356784  | 3.363359  | 3.822824  |
| 17 | 1 | -0.457873 | 1.797617  | 3.886339  |
| 18 | 1 | 1.308724  | 1.872717  | 3.917618  |
| 19 | 6 | -2.134033 | 2.638025  | 1.651343  |
| 20 | 1 | -2.901634 | 2.447585  | 0.898690  |
| 21 | 1 | -2.363711 | 2.038125  | 2.536264  |
| 22 | 1 | -2.208630 | 3.694118  | 1.943192  |
| 23 | 6 | -1.227196 | 2.725403  | -1.409841 |
| 24 | 1 | -1.216234 | 3.806508  | -1.598783 |
| 25 | 1 | -0.899449 | 2.220169  | -2.318589 |
| 26 | 1 | -2.260296 | 2.435140  | -1.206427 |
| 27 | 6 | 1.347148  | -2.156719 | 1.524826  |
| 28 | 7 | 1.452034  | -1.268163 | 0.569743  |
| 29 | 6 | 0.298062  | -1.809431 | 2.473461  |
| 30 | 6 | 0.341807  | -2.331161 | 3.883260  |
| 31 | 1 | -0.481617 | -1.919434 | 4.471226  |
| 32 | 1 | 0.258168  | -3.426509 | 3.900500  |
| 33 | 1 | 1.287637  | -2.074525 | 4.376364  |
| 34 | 6 | 2.177764  | -3.396976 | 1.646127  |
| 35 | 1 | 1.561908  | -4.241488 | 1.967636  |
| 36 | 1 | 2.669678  | -3.655403 | 0.709792  |
| 37 | 1 | 2.949518  | -3.242795 | 2.411419  |
| 38 | 6 | -0.684202 | -0.978362 | 1.979174  |
| 39 | 1 | -1.432421 | -0.639250 | 2.686024  |
| 40 | 8 | 2.224628  | -1.649325 | -0.551071 |
| 41 | 6 | 3.566053  | -1.300178 | -0.518646 |
| 42 | 8 | 4.069939  | -0.795931 | 0.445881  |
| 43 | 6 | 4.259279  | -1.720256 | -1.819532 |
| 44 | 6 | 3.404831  | -1.355834 | -3.059569 |
| 45 | 1 | 3.214425  | -0.279446 | -3.110219 |
| 46 | 1 | 3.951112  | -1.648728 | -3.962247 |
| 47 | 1 | 2.445179  | -1.879877 | -3.055927 |
| 48 | 6 | 5.631138  | -1.013640 | -1.889215 |
| 49 | 1 | 6.150106  | -1.330765 | -2.799424 |
| 50 | 1 | 5.516682  | 0.074791  | -1.921050 |
| 51 | 1 | 6.255797  | -1.268579 | -1.028172 |
| 52 | 6 | 4.464847  | -3.262655 | -1.760614 |
| 53 | 1 | 5.009674  | -3.579188 | -2.656113 |
| 54 | 1 | 5.053674  | -3.554444 | -0.883948 |
| 55 | 1 | 3.508017  | -3.794004 | -1.740380 |
| 56 | 6 | -1.014532 | -0.720972 | -0.729128 |
| 57 | 1 | -1.703083 | -0.067737 | -1.259019 |
| 58 | 1 | -0.462418 | -1.355311 | -1.419175 |
| 59 | 6 | -1.598295 | -1.439193 | 0.443865  |
| 60 | 6 | -1.468321 | -2.966124 | 0.354935  |
| 61 | 1 | -0.450237 | -3.281762 | 0.122020  |
| 62 | 1 | -1.798446 | -3.452839 | 1.277799  |
| 63 | 1 | -2.100623 | -3.308897 | -0.473237 |
| 64 | 6 | -3.021586 | -0.984936 | 0.828297  |
| 65 | 1 | -3.299284 | -1.417506 | 1.795926  |
| 66 | 1 | -3.038367 | 0.101588  | 0.941232  |
| 67 | 6 | -4.074808 | -1.395397 | -0.218407 |
| 68 | 1 | -4.234081 | -2.478651 | -0.230695 |
| 69 | 1 | -3.754749 | -1.119986 | -1.232091 |

|    |   |           |           |           |
|----|---|-----------|-----------|-----------|
| 70 | 6 | -5.416719 | -0.731436 | 0.029404  |
| 71 | 8 | -5.629782 | 0.166898  | 0.833747  |
| 72 | 8 | -6.371218 | -1.253565 | -0.774837 |
| 73 | 6 | -7.730516 | -0.677753 | -0.670746 |
| 74 | 1 | -7.663022 | 0.390871  | -0.892438 |
| 75 | 1 | -8.072115 | -0.801523 | 0.360451  |
| 76 | 6 | -8.607359 | -1.419241 | -1.662884 |
| 77 | 1 | -9.626268 | -1.020302 | -1.618286 |
| 78 | 1 | -8.236587 | -1.296351 | -2.685312 |
| 79 | 1 | -8.648316 | -2.488039 | -1.430750 |

**6a** (E = -1852.0406558 au)

| Center Number | Atomic Number | Coordinates (Angstroms) |           |           |
|---------------|---------------|-------------------------|-----------|-----------|
|               |               | X                       | Y         | Z         |
| 1             | 77            | -0.391203               | -0.977699 | 0.212620  |
| 2             | 6             | -1.770847               | -0.733969 | -1.453302 |
| 3             | 6             | -2.648531               | -0.437505 | -0.310308 |
| 4             | 6             | -2.724051               | -1.597438 | 0.474595  |
| 5             | 6             | -1.903599               | -2.628075 | -0.152072 |
| 6             | 6             | -1.436251               | -2.144211 | -1.415074 |
| 7             | 6             | -1.659465               | 0.163793  | -2.639922 |
| 8             | 9             | -1.386566               | 1.470388  | -2.305081 |
| 9             | 9             | -2.843633               | 0.199770  | -3.358868 |
| 10            | 9             | -0.687752               | -0.212555 | -3.531763 |
| 11            | 6             | -3.413282               | 0.833509  | -0.070834 |
| 12            | 1             | -3.561885               | 1.016057  | 0.995346  |
| 13            | 1             | -2.919468               | 1.704568  | -0.499979 |
| 14            | 1             | -4.402624               | 0.745673  | -0.539911 |
| 15            | 6             | -3.587123               | -1.790877 | 1.688058  |
| 16            | 1             | -4.570595               | -2.168015 | 1.376749  |
| 17            | 1             | -3.165167               | -2.521841 | 2.381359  |
| 18            | 1             | -3.749263               | -0.855119 | 2.228996  |
| 19            | 6             | -1.829079               | -4.060705 | 0.300927  |
| 20            | 1             | -0.916974               | -4.548552 | -0.050124 |
| 21            | 1             | -1.860473               | -4.142761 | 1.390018  |
| 22            | 1             | -2.686569               | -4.617936 | -0.099048 |
| 23            | 6             | -0.968657               | -3.026670 | -2.539078 |
| 24            | 1             | -1.861262               | -3.418370 | -3.046169 |
| 25            | 1             | -0.371839               | -2.496865 | -3.278466 |
| 26            | 1             | -0.397785               | -3.881126 | -2.172397 |
| 27            | 6             | 0.480734                | 0.472047  | 2.395024  |
| 28            | 7             | 0.235406                | 0.815247  | 1.182570  |
| 29            | 6             | 0.273853                | -1.012961 | 2.425458  |
| 30            | 6             | -0.605239               | -1.575625 | 3.517950  |
| 31            | 1             | -0.801506               | -2.637006 | 3.348868  |
| 32            | 1             | -0.084718               | -1.483253 | 4.480547  |
| 33            | 1             | -1.555321               | -1.041992 | 3.600036  |
| 34            | 6             | 0.894035                | 1.316402  | 3.548923  |
| 35            | 1             | 1.663081                | 0.797752  | 4.129744  |
| 36            | 1             | 1.279510                | 2.283434  | 3.222137  |
| 37            | 1             | 0.036337                | 1.488882  | 4.210928  |
| 38            | 6             | 1.142340                | -1.802525 | 1.659517  |
| 39            | 1             | 1.056909                | -2.875255 | 1.793682  |
| 40            | 8             | 0.418950                | 2.140741  | 0.769073  |
| 41            | 6             | -0.557416               | 3.052559  | 1.181874  |
| 42            | 8             | -1.460549               | 2.728984  | 1.897940  |
| 43            | 6             | -0.251150               | 4.441694  | 0.617020  |
| 44            | 6             | -0.141697               | 4.374310  | -0.929339 |
| 45            | 1             | -1.072868               | 4.013499  | -1.378473 |
| 46            | 1             | 0.052518                | 5.381630  | -1.312172 |

|    |   |           |           |           |
|----|---|-----------|-----------|-----------|
| 47 | 1 | 0.675914  | 3.722327  | -1.247131 |
| 48 | 6 | -1.393826 | 5.394855  | 1.028253  |
| 49 | 1 | -1.179290 | 6.395899  | 0.640990  |
| 50 | 1 | -2.354023 | 5.066145  | 0.617909  |
| 51 | 1 | -1.489573 | 5.459150  | 2.116470  |
| 52 | 6 | 1.095194  | 4.934285  | 1.219397  |
| 53 | 1 | 1.297927  | 5.943372  | 0.846298  |
| 54 | 1 | 1.049976  | 4.980758  | 2.313399  |
| 55 | 1 | 1.926711  | 4.287279  | 0.926290  |
| 56 | 6 | 2.332722  | -1.278044 | 0.880229  |
| 57 | 1 | 2.689943  | -0.329996 | 1.287028  |
| 58 | 1 | 3.170792  | -1.980431 | 0.909430  |
| 59 | 6 | 1.705893  | -1.116851 | -0.516408 |
| 60 | 6 | 1.965351  | -2.383167 | -1.338469 |
| 61 | 1 | 1.551611  | -3.277433 | -0.861727 |
| 62 | 1 | 1.559957  | -2.304760 | -2.349163 |
| 63 | 1 | 3.050331  | -2.543557 | -1.429533 |
| 64 | 6 | 2.136023  | 0.149151  | -1.278484 |
| 65 | 1 | 1.543356  | 0.229668  | -2.197575 |
| 66 | 1 | 1.928810  | 1.042668  | -0.686641 |
| 67 | 6 | 3.640027  | 0.159461  | -1.648638 |
| 68 | 1 | 3.886408  | -0.611623 | -2.382204 |
| 69 | 1 | 4.249791  | -0.044172 | -0.755326 |
| 70 | 6 | 4.091137  | 1.500821  | -2.190543 |
| 71 | 8 | 3.664535  | 2.591471  | -1.829735 |
| 72 | 8 | 5.063318  | 1.360598  | -3.125049 |
| 73 | 6 | 5.631305  | 2.600593  | -3.695977 |
| 74 | 1 | 6.051963  | 3.189947  | -2.876318 |
| 75 | 1 | 4.815662  | 3.168407  | -4.151997 |
| 76 | 6 | 6.683250  | 2.186572  | -4.708776 |
| 77 | 1 | 7.131370  | 3.079896  | -5.156638 |
| 78 | 1 | 7.480373  | 1.605603  | -4.234260 |
| 79 | 1 | 6.242643  | 1.586459  | -5.511150 |

**6b** (E = -1852.0398991 au)

| Center Number | Atomic Number | Coordinates (Angstroms) |           |           |
|---------------|---------------|-------------------------|-----------|-----------|
|               |               | X                       | Y         | Z         |
| 1             | 77            | 0.683984                | -0.800043 | -0.395495 |
| 2             | 6             | 0.505287                | -1.207199 | 1.739592  |
| 3             | 6             | 1.835047                | -0.591498 | 1.672225  |
| 4             | 6             | 2.647461                | -1.414756 | 0.871995  |
| 5             | 6             | 1.849115                | -2.550667 | 0.437411  |
| 6             | 6             | 0.568304                | -2.497547 | 1.076132  |
| 7             | 6             | -0.559816               | -0.776004 | 2.690206  |
| 8             | 9             | -0.731753               | 0.587917  | 2.736053  |
| 9             | 9             | -0.270368               | -1.162603 | 3.989024  |
| 10            | 9             | -1.794286               | -1.305613 | 2.405243  |
| 11            | 6             | 2.292986                | 0.645081  | 2.390289  |
| 12            | 1             | 3.100195                | 1.143520  | 1.850487  |
| 13            | 1             | 1.486893                | 1.361436  | 2.544123  |
| 14            | 1             | 2.674631                | 0.356626  | 3.379371  |
| 15            | 6             | 4.114493                | -1.218189 | 0.611694  |
| 16            | 1             | 4.691829                | -1.617425 | 1.456190  |
| 17            | 1             | 4.444402                | -1.746167 | -0.285363 |
| 18            | 1             | 4.375124                | -0.161475 | 0.505602  |
| 19            | 6             | 2.370578                | -3.737384 | -0.324273 |
| 20            | 1             | 1.568123                | -4.267336 | -0.842371 |
| 21            | 1             | 3.121011                | -3.448292 | -1.063400 |
| 22            | 1             | 2.845018                | -4.439890 | 0.373673  |
| 23            | 6             | -0.321590               | -3.697075 | 1.260568  |

|    |   |           |           |           |
|----|---|-----------|-----------|-----------|
| 24 | 1 | 0.127272  | -4.326164 | 2.041492  |
| 25 | 1 | -1.328573 | -3.438304 | 1.580980  |
| 26 | 1 | -0.388201 | -4.298825 | 0.352458  |
| 27 | 6 | 1.355023  | 1.203547  | -2.177370 |
| 28 | 7 | 0.698388  | 1.226257  | -1.075347 |
| 29 | 6 | 1.678600  | -0.242436 | -2.402515 |
| 30 | 6 | 3.114093  | -0.587292 | -2.728921 |
| 31 | 1 | 3.262969  | -1.669228 | -2.757545 |
| 32 | 1 | 3.353442  | -0.195403 | -3.726542 |
| 33 | 1 | 3.818976  | -0.143053 | -2.022062 |
| 34 | 6 | 1.731350  | 2.329834  | -3.074121 |
| 35 | 1 | 1.599155  | 2.030173  | -4.118586 |
| 36 | 1 | 1.133321  | 3.220302  | -2.874302 |
| 37 | 1 | 2.789728  | 2.581304  | -2.931609 |
| 38 | 6 | 0.607227  | -1.120484 | -2.625585 |
| 39 | 1 | 0.871124  | -2.131283 | -2.917647 |
| 40 | 8 | 0.152595  | 2.428183  | -0.603904 |
| 41 | 6 | 1.047696  | 3.308012  | 0.009966  |
| 42 | 8 | 2.223080  | 3.084717  | 0.055594  |
| 43 | 6 | 0.293743  | 4.525693  | 0.549378  |
| 44 | 6 | -0.771344 | 4.061034  | 1.579708  |
| 45 | 1 | -0.311271 | 3.523839  | 2.416367  |
| 46 | 1 | -1.280173 | 4.942840  | 1.982401  |
| 47 | 1 | -1.520943 | 3.412549  | 1.118099  |
| 48 | 6 | 1.311713  | 5.468536  | 1.226100  |
| 49 | 1 | 0.782336  | 6.344599  | 1.613979  |
| 50 | 1 | 1.819100  | 4.975351  | 2.061219  |
| 51 | 1 | 2.071937  | 5.811514  | 0.517317  |
| 52 | 6 | -0.401030 | 5.254244  | -0.634682 |
| 53 | 1 | -0.912897 | 6.142142  | -0.249791 |
| 54 | 1 | 0.328716  | 5.581589  | -1.383626 |
| 55 | 1 | -1.142745 | 4.614376  | -1.120776 |
| 56 | 6 | -0.843970 | -0.700086 | -2.759124 |
| 57 | 1 | -1.364353 | -1.310769 | -3.501280 |
| 58 | 1 | -0.932566 | 0.337937  | -3.084713 |
| 59 | 6 | -1.340424 | -0.891544 | -1.313921 |
| 60 | 6 | -2.274781 | 0.216414  | -0.815224 |
| 61 | 1 | -1.829186 | 1.209912  | -0.880797 |
| 62 | 1 | -3.191975 | 0.232496  | -1.424064 |
| 63 | 1 | -2.567327 | 0.041096  | 0.225654  |
| 64 | 6 | -1.982267 | -2.278516 | -1.133729 |
| 65 | 1 | -1.289002 | -3.060048 | -1.461638 |
| 66 | 1 | -2.184483 | -2.444672 | -0.073332 |
| 67 | 6 | -3.316265 | -2.463659 | -1.897791 |
| 68 | 1 | -3.225267 | -2.121368 | -2.938890 |
| 69 | 1 | -4.123743 | -1.879791 | -1.448985 |
| 70 | 6 | -3.749452 | -3.915291 | -1.955129 |
| 71 | 8 | -2.996291 | -4.882275 | -1.962723 |
| 72 | 8 | -5.097744 | -4.029185 | -2.029128 |
| 73 | 6 | -5.652662 | -5.394457 | -2.151273 |
| 74 | 1 | -5.330213 | -5.970261 | -1.279402 |
| 75 | 1 | -5.230448 | -5.853628 | -3.049501 |
| 76 | 6 | -7.162477 | -5.258861 | -2.227275 |
| 77 | 1 | -7.614695 | -6.252411 | -2.315395 |
| 78 | 1 | -7.560671 | -4.780746 | -1.326803 |
| 79 | 1 | -7.461878 | -4.668388 | -3.098924 |

6c (E = -1852.0512633 au)

| Center Number | Atomic Number | Coordinates (Angstroms) |   |   |
|---------------|---------------|-------------------------|---|---|
|               |               | X                       | Y | Z |

|    |    |           |           |           |
|----|----|-----------|-----------|-----------|
| 1  | 77 | 1.384582  | -0.512667 | -0.068673 |
| 2  | 6  | 2.683252  | 0.276164  | 1.474839  |
| 3  | 6  | 3.370763  | 0.777280  | 0.274346  |
| 4  | 6  | 3.770510  | -0.340055 | -0.476255 |
| 5  | 6  | 3.366145  | -1.543708 | 0.241665  |
| 6  | 6  | 2.802147  | -1.170731 | 1.505080  |
| 7  | 6  | 2.311829  | 1.138589  | 2.633557  |
| 8  | 9  | 1.754704  | 2.338168  | 2.255875  |
| 9  | 9  | 3.419576  | 1.463642  | 3.400179  |
| 10 | 9  | 1.417065  | 0.551854  | 3.492255  |
| 11 | 6  | 3.670484  | 2.214934  | -0.041057 |
| 12 | 1  | 4.034581  | 2.324582  | -1.064108 |
| 13 | 1  | 2.798347  | 2.857143  | 0.079184  |
| 14 | 1  | 4.453486  | 2.578323  | 0.637477  |
| 15 | 6  | 4.556720  | -0.330233 | -1.757040 |
| 16 | 1  | 5.626804  | -0.438528 | -1.536206 |
| 17 | 1  | 4.274694  | -1.158518 | -2.411828 |
| 18 | 1  | 4.422051  | 0.600707  | -2.312375 |
| 19 | 6  | 3.742914  | -2.941445 | -0.166155 |
| 20 | 1  | 3.101106  | -3.691459 | 0.300254  |
| 21 | 1  | 3.692923  | -3.076286 | -1.249371 |
| 22 | 1  | 4.776547  | -3.142445 | 0.144738  |
| 23 | 6  | 2.538342  | -2.101182 | 2.656869  |
| 24 | 1  | 3.416999  | -2.108924 | 3.315041  |
| 25 | 1  | 1.678591  | -1.798099 | 3.254637  |
| 26 | 1  | 2.374378  | -3.123267 | 2.309360  |
| 27 | 6  | -0.375385 | 0.221705  | -2.053203 |
| 28 | 7  | -0.049086 | 0.782582  | -0.947484 |
| 29 | 6  | 0.464255  | -1.022175 | -2.108177 |
| 30 | 6  | 1.324023  | -1.196719 | -3.343545 |
| 31 | 1  | 1.991235  | -2.054973 | -3.234460 |
| 32 | 1  | 0.679958  | -1.383202 | -4.213228 |
| 33 | 1  | 1.921993  | -0.305273 | -3.554431 |
| 34 | 6  | -1.322006 | 0.697441  | -3.100718 |
| 35 | 1  | -1.871971 | -0.145363 | -3.528066 |
| 36 | 1  | -2.026190 | 1.429220  | -2.701864 |
| 37 | 1  | -0.753807 | 1.167628  | -3.914285 |
| 38 | 6  | 0.239737  | -2.077565 | -1.202920 |
| 39 | 1  | 0.830776  | -2.964747 | -1.413430 |
| 40 | 8  | -0.781556 | 1.884954  | -0.486168 |
| 41 | 6  | -0.216034 | 3.129091  | -0.754134 |
| 42 | 8  | 0.784613  | 3.239680  | -1.403459 |
| 43 | 6  | -1.077896 | 4.241968  | -0.154207 |
| 44 | 6  | -1.403225 | 3.938763  | 1.331442  |
| 45 | 1  | -0.489775 | 3.827305  | 1.925051  |
| 46 | 1  | -1.978305 | 4.774076  | 1.744091  |
| 47 | 1  | -1.999144 | 3.027901  | 1.435469  |
| 48 | 6  | -0.304380 | 5.573284  | -0.269662 |
| 49 | 1  | -0.920631 | 6.380512  | 0.138742  |
| 50 | 1  | 0.633447  | 5.539096  | 0.294440  |
| 51 | 1  | -0.069975 | 5.811017  | -1.311496 |
| 52 | 6  | -2.395115 | 4.321205  | -0.979249 |
| 53 | 1  | -3.004590 | 5.144491  | -0.592747 |
| 54 | 1  | -2.189995 | 4.516788  | -2.037701 |
| 55 | 1  | -2.975640 | 3.397609  | -0.895620 |
| 56 | 6  | -0.365047 | -1.239134 | 0.908513  |
| 57 | 1  | -1.049638 | -0.409945 | 1.089493  |
| 58 | 1  | -0.097729 | -1.699783 | 1.856837  |
| 59 | 6  | -0.863213 | -2.257604 | -0.138236 |
| 60 | 6  | -0.771092 | -3.703034 | 0.396008  |
| 61 | 1  | 0.252349  | -3.938371 | 0.707982  |
| 62 | 1  | -1.421098 | -3.834907 | 1.266496  |
| 63 | 1  | -1.070342 | -4.424761 | -0.374483 |

|    |   |           |           |           |
|----|---|-----------|-----------|-----------|
| 64 | 6 | -2.282126 | -1.975249 | -0.696301 |
| 65 | 1 | -2.341485 | -0.943413 | -1.054584 |
| 66 | 1 | -2.454079 | -2.624363 | -1.565944 |
| 67 | 6 | -3.406057 | -2.181917 | 0.331585  |
| 68 | 1 | -3.157286 | -1.681023 | 1.278982  |
| 69 | 1 | -3.550447 | -3.239338 | 0.571764  |
| 70 | 6 | -4.735306 | -1.619044 | -0.132703 |
| 71 | 8 | -4.887114 | -0.789219 | -1.021278 |
| 72 | 8 | -5.763299 | -2.136001 | 0.581642  |
| 73 | 6 | -7.120245 | -1.639149 | 0.267216  |
| 74 | 1 | -7.319654 | -1.843860 | -0.788213 |
| 75 | 1 | -7.129863 | -0.556632 | 0.421943  |
| 76 | 6 | -8.086126 | -2.362403 | 1.187860  |
| 77 | 1 | -9.107431 | -2.022948 | 0.985184  |
| 78 | 1 | -8.047522 | -3.444450 | 1.027599  |
| 79 | 1 | -7.859167 | -2.155461 | 2.238403  |

**6d** (E = -1852.0512412 au)

| Center Number | Atomic Number | Coordinates (Angstroms) |           |           |
|---------------|---------------|-------------------------|-----------|-----------|
|               |               | X                       | Y         | Z         |
| 1             | 77            | 0.229343                | 0.443395  | 0.843353  |
| 2             | 6             | 0.730083                | 2.289935  | -0.167705 |
| 3             | 6             | 1.716964                | 2.289525  | 0.923562  |
| 4             | 6             | 1.003770                | 2.332644  | 2.134808  |
| 5             | 6             | -0.420889               | 2.368363  | 1.827335  |
| 6             | 6             | -0.592604               | 2.457743  | 0.407828  |
| 7             | 6             | 1.066243                | 2.495554  | -1.606536 |
| 8             | 9             | 2.238162                | 1.885478  | -1.982443 |
| 9             | 9             | 1.227945                | 3.839733  | -1.902038 |
| 10            | 9             | 0.100024                | 2.034876  | -2.466811 |
| 11            | 6             | 3.211999                | 2.324189  | 0.777889  |
| 12            | 1             | 3.703318                | 2.095257  | 1.725123  |
| 13            | 1             | 3.572138                | 1.621224  | 0.027175  |
| 14            | 1             | 3.523195                | 3.331060  | 0.469559  |
| 15            | 6             | 1.584504                | 2.415147  | 3.518465  |
| 16            | 1             | 1.686161                | 3.467652  | 3.814438  |
| 17            | 1             | 0.939843                | 1.930963  | 4.255960  |
| 18            | 1             | 2.573650                | 1.955188  | 3.577191  |
| 19            | 6             | -1.509877               | 2.552763  | 2.847938  |
| 20            | 1             | -2.483913               | 2.239839  | 2.466704  |
| 21            | 1             | -1.307015               | 1.994643  | 3.765257  |
| 22            | 1             | -1.578714               | 3.615340  | 3.115584  |
| 23            | 6             | -1.873404               | 2.804438  | -0.299920 |
| 24            | 1             | -1.932819               | 3.894979  | -0.411651 |
| 25            | 1             | -1.935351               | 2.363844  | -1.295172 |
| 26            | 1             | -2.743797               | 2.481893  | 0.275319  |
| 27            | 6             | 1.203465                | -2.054118 | 1.466339  |
| 28            | 7             | 1.435692                | -1.260646 | 0.486824  |
| 29            | 6             | 0.214205                | -1.316549 | 2.320194  |
| 30            | 6             | 0.596949                | -1.136395 | 3.775456  |
| 31            | 1             | -0.107386               | -0.476120 | 4.287026  |
| 32            | 1             | 0.567483                | -2.110403 | 4.281988  |
| 33            | 1             | 1.608125                | -0.733219 | 3.882743  |
| 34            | 6             | 1.806980                | -3.384017 | 1.759517  |
| 35            | 1             | 1.056014                | -4.056735 | 2.182804  |
| 36            | 1             | 2.238111                | -3.834815 | 0.864006  |
| 37            | 1             | 2.603244                | -3.264978 | 2.505899  |
| 38            | 6             | -1.090111               | -1.068773 | 1.854150  |
| 39            | 1             | -1.741231               | -0.624575 | 2.602055  |
| 40            | 8             | 2.216748                | -1.683101 | -0.596330 |

|    |   |           |           |           |
|----|---|-----------|-----------|-----------|
| 41 | 6 | 3.591363  | -1.491816 | -0.450690 |
| 42 | 8 | 4.062516  | -1.057823 | 0.561201  |
| 43 | 6 | 4.324713  | -1.946978 | -1.713876 |
| 44 | 6 | 3.741778  | -1.228205 | -2.959177 |
| 45 | 1 | 3.826936  | -0.140307 | -2.868115 |
| 46 | 1 | 4.306997  | -1.541423 | -3.843053 |
| 47 | 1 | 2.690234  | -1.483708 | -3.116298 |
| 48 | 6 | 5.822452  | -1.607133 | -1.555460 |
| 49 | 1 | 6.359193  | -1.938360 | -2.450025 |
| 50 | 1 | 5.976980  | -0.529411 | -1.441258 |
| 51 | 1 | 6.256805  | -2.110240 | -0.686239 |
| 52 | 6 | 4.142862  | -3.485033 | -1.858081 |
| 53 | 1 | 4.703530  | -3.824702 | -2.735018 |
| 54 | 1 | 4.530472  | -4.015890 | -0.981237 |
| 55 | 1 | 3.091894  | -3.753744 | -1.998929 |
| 56 | 6 | -1.103018 | -0.610729 | -0.448631 |
| 57 | 1 | -1.788338 | 0.096393  | -0.910753 |
| 58 | 1 | -0.537033 | -1.126757 | -1.224391 |
| 59 | 6 | -1.790526 | -1.549051 | 0.564884  |
| 60 | 6 | -1.592454 | -3.050012 | 0.273978  |
| 61 | 1 | -0.537089 | -3.312927 | 0.165183  |
| 62 | 1 | -2.021941 | -3.663255 | 1.075694  |
| 63 | 1 | -2.083000 | -3.319170 | -0.667553 |
| 64 | 6 | -3.299892 | -1.221839 | 0.728487  |
| 65 | 1 | -3.684637 | -1.771433 | 1.599113  |
| 66 | 1 | -3.401011 | -0.154310 | 0.959399  |
| 67 | 6 | -4.158954 | -1.546878 | -0.500880 |
| 68 | 1 | -4.256722 | -2.626173 | -0.656003 |
| 69 | 1 | -3.698103 | -1.147521 | -1.416095 |
| 70 | 6 | -5.556157 | -0.964090 | -0.413656 |
| 71 | 8 | -5.928292 | -0.115086 | 0.387223  |
| 72 | 8 | -6.366661 | -1.493852 | -1.361508 |
| 73 | 6 | -7.755679 | -0.990579 | -1.418978 |
| 74 | 1 | -7.719001 | 0.089658  | -1.584893 |
| 75 | 1 | -8.225118 | -1.180347 | -0.449782 |
| 76 | 6 | -8.451093 | -1.725343 | -2.550531 |
| 77 | 1 | -9.488043 | -1.381511 | -2.626849 |
| 78 | 1 | -7.956044 | -1.533884 | -3.507760 |
| 79 | 1 | -8.461174 | -2.805046 | -2.371181 |

**TS6c-7c** (E = -1852.0356901 au)

| Center Number | Atomic Number | Coordinates (Angstroms) |          |           |
|---------------|---------------|-------------------------|----------|-----------|
|               |               | X                       | Y        | Z         |
| 1             | 77            | 0.229343                | 0.443395 | 0.843353  |
| 2             | 6             | 0.730083                | 2.289935 | -0.167705 |
| 3             | 6             | 1.716964                | 2.289525 | 0.923562  |
| 4             | 6             | 1.003770                | 2.332644 | 2.134808  |
| 5             | 6             | -0.420889               | 2.368363 | 1.827335  |
| 6             | 6             | -0.592604               | 2.457743 | 0.407828  |
| 7             | 6             | 1.066243                | 2.495554 | -1.606536 |
| 8             | 9             | 2.238162                | 1.885478 | -1.982443 |
| 9             | 9             | 1.227945                | 3.839733 | -1.902038 |
| 10            | 9             | 0.100024                | 2.034876 | -2.466811 |
| 11            | 6             | 3.211999                | 2.324189 | 0.777889  |
| 12            | 1             | 3.703318                | 2.095257 | 1.725123  |
| 13            | 1             | 3.572138                | 1.621224 | 0.027175  |
| 14            | 1             | 3.523195                | 3.331060 | 0.469559  |
| 15            | 6             | 1.584504                | 2.415147 | 3.518465  |
| 16            | 1             | 1.686161                | 3.467652 | 3.814438  |
| 17            | 1             | 0.939843                | 1.930963 | 4.255960  |

|    |   |           |           |           |
|----|---|-----------|-----------|-----------|
| 18 | 1 | 2.573650  | 1.955188  | 3.577191  |
| 19 | 6 | -1.509877 | 2.552763  | 2.847938  |
| 20 | 1 | -2.483913 | 2.239839  | 2.466704  |
| 21 | 1 | -1.307015 | 1.994643  | 3.765257  |
| 22 | 1 | -1.578714 | 3.615340  | 3.115584  |
| 23 | 6 | -1.873404 | 2.804438  | -0.299920 |
| 24 | 1 | -1.932819 | 3.894979  | -0.411651 |
| 25 | 1 | -1.935351 | 2.363844  | -1.295172 |
| 26 | 1 | -2.743797 | 2.481893  | 0.275319  |
| 27 | 6 | 1.203465  | -2.054118 | 1.466339  |
| 28 | 7 | 1.435692  | -1.260646 | 0.486824  |
| 29 | 6 | 0.214205  | -1.316549 | 2.320194  |
| 30 | 6 | 0.596949  | -1.136395 | 3.775456  |
| 31 | 1 | -0.107386 | -0.476120 | 4.287026  |
| 32 | 1 | 0.567483  | -2.110403 | 4.281988  |
| 33 | 1 | 1.608125  | -0.733219 | 3.882743  |
| 34 | 6 | 1.806980  | -3.384017 | 1.759517  |
| 35 | 1 | 1.056014  | -4.056735 | 2.182804  |
| 36 | 1 | 2.238111  | -3.834815 | 0.864006  |
| 37 | 1 | 2.603244  | -3.264978 | 2.505899  |
| 38 | 6 | -1.090111 | -1.068773 | 1.854150  |
| 39 | 1 | -1.741231 | -0.624575 | 2.602055  |
| 40 | 8 | 2.216748  | -1.683101 | -0.596330 |
| 41 | 6 | 3.591363  | -1.491816 | -0.450690 |
| 42 | 8 | 4.062516  | -1.057823 | 0.561201  |
| 43 | 6 | 4.324713  | -1.946978 | -1.713876 |
| 44 | 6 | 3.741778  | -1.228205 | -2.959177 |
| 45 | 1 | 3.826936  | -0.140307 | -2.868115 |
| 46 | 1 | 4.306997  | -1.541423 | -3.843053 |
| 47 | 1 | 2.690234  | -1.483708 | -3.116298 |
| 48 | 6 | 5.822452  | -1.607133 | -1.555460 |
| 49 | 1 | 6.359193  | -1.938360 | -2.450025 |
| 50 | 1 | 5.976980  | -0.529411 | -1.441258 |
| 51 | 1 | 6.256805  | -2.110240 | -0.686239 |
| 52 | 6 | 4.142862  | -3.485033 | -1.858081 |
| 53 | 1 | 4.703530  | -3.824702 | -2.735018 |
| 54 | 1 | 4.530472  | -4.015890 | -0.981237 |
| 55 | 1 | 3.091894  | -3.753744 | -1.998929 |
| 56 | 6 | -1.103018 | -0.610729 | -0.448631 |
| 57 | 1 | -1.788338 | 0.096393  | -0.910753 |
| 58 | 1 | -0.537033 | -1.126757 | -1.224391 |
| 59 | 6 | -1.790526 | -1.549051 | 0.564884  |
| 60 | 6 | -1.592454 | -3.050012 | 0.273978  |
| 61 | 1 | -0.537089 | -3.312927 | 0.165183  |
| 62 | 1 | -2.021941 | -3.663255 | 1.075694  |
| 63 | 1 | -2.083000 | -3.319170 | -0.667553 |
| 64 | 6 | -3.299892 | -1.221839 | 0.728487  |
| 65 | 1 | -3.684637 | -1.771433 | 1.599113  |
| 66 | 1 | -3.401011 | -0.154310 | 0.959399  |
| 67 | 6 | -4.158954 | -1.546878 | -0.500880 |
| 68 | 1 | -4.256722 | -2.626173 | -0.656003 |
| 69 | 1 | -3.698103 | -1.147521 | -1.416095 |
| 70 | 6 | -5.556157 | -0.964090 | -0.413656 |
| 71 | 8 | -5.928292 | -0.115086 | 0.387223  |
| 72 | 8 | -6.366661 | -1.493852 | -1.361508 |
| 73 | 6 | -7.755679 | -0.990579 | -1.418978 |
| 74 | 1 | -7.719001 | 0.089658  | -1.584893 |
| 75 | 1 | -8.225118 | -1.180347 | -0.449782 |
| 76 | 6 | -8.451093 | -1.725343 | -2.550531 |
| 77 | 1 | -9.488043 | -1.381511 | -2.626849 |
| 78 | 1 | -7.956044 | -1.533884 | -3.507760 |
| 79 | 1 | -8.461174 | -2.805046 | -2.371181 |

7c (E = -1852.0360042 au)

| Center Number | Atomic Number | Coordinates (Angstroms) |           |           |
|---------------|---------------|-------------------------|-----------|-----------|
|               |               | X                       | Y         | Z         |
| 1             | 77            | -0.426449               | 0.263439  | 0.028012  |
| 2             | 6             | 0.566854                | -0.106436 | 1.886871  |
| 3             | 6             | 1.474076                | 0.643365  | 1.018199  |
| 4             | 6             | 1.006854                | 2.012929  | 0.910138  |
| 5             | 6             | -0.246950               | 2.088653  | 1.534059  |
| 6             | 6             | -0.558430               | 0.764819  | 2.106791  |
| 7             | 6             | 0.888392                | -1.435214 | 2.507626  |
| 8             | 1             | 1.485170                | -2.047955 | 1.828057  |
| 9             | 1             | 1.482731                | -1.262598 | 3.414816  |
| 10            | 1             | -0.002171               | -1.995088 | 2.788535  |
| 11            | 6             | 2.820081                | 0.164020  | 0.563721  |
| 12            | 1             | 3.102823                | 0.620263  | -0.387863 |
| 13            | 1             | 2.849864                | -0.921185 | 0.452744  |
| 14            | 1             | 3.573918                | 0.448968  | 1.310524  |
| 15            | 6             | 1.777424                | 3.137850  | 0.278944  |
| 16            | 1             | 2.503188                | 3.532025  | 1.002635  |
| 17            | 1             | 1.126454                | 3.960847  | -0.023952 |
| 18            | 1             | 2.327207                | 2.805977  | -0.603398 |
| 19            | 6             | -1.123816               | 3.300494  | 1.638438  |
| 20            | 1             | -2.152244               | 3.084197  | 1.338421  |
| 21            | 1             | -0.745047               | 4.117699  | 1.023007  |
| 22            | 1             | -1.153579               | 3.645709  | 2.680195  |
| 23            | 6             | -1.698056               | 0.528986  | 3.042203  |
| 24            | 9             | -2.881857               | 1.071007  | 2.596026  |
| 25            | 9             | -1.460341               | 1.107055  | 4.276983  |
| 26            | 9             | -1.949556               | -0.796701 | 3.282057  |
| 27            | 6             | 0.575176                | -0.670480 | -2.808709 |
| 28            | 7             | -0.013283               | 0.189146  | -2.043484 |
| 29            | 6             | 1.093947                | -1.909393 | -2.191657 |
| 30            | 6             | 0.311018                | -2.738749 | -1.483748 |
| 31            | 1             | 0.802402                | -3.638990 | -1.120592 |
| 32            | 6             | -1.451323               | -1.550245 | -0.081653 |
| 33            | 1             | -2.488153               | -1.187506 | -0.195539 |
| 34            | 1             | -1.400508               | -2.013018 | 0.903919  |
| 35            | 6             | -1.175960               | -2.648724 | -1.156195 |
| 36            | 8             | -0.653438               | 1.273920  | -2.730976 |
| 37            | 6             | 0.148053                | 2.360841  | -3.041430 |
| 38            | 8             | 1.331927                | 2.357592  | -2.848612 |
| 39            | 6             | -0.692832               | 3.478714  | -3.669540 |
| 40            | 6             | -1.859212               | 3.862058  | -2.720297 |
| 41            | 1             | -1.486779               | 4.197084  | -1.745909 |
| 42            | 1             | -2.543775               | 3.023394  | -2.566111 |
| 43            | 1             | -2.422441               | 4.687117  | -3.168410 |
| 44            | 6             | 0.219851                | 4.700572  | -3.908508 |
| 45            | 1             | -0.369168               | 5.501993  | -4.366019 |
| 46            | 1             | 1.048244                | 4.455256  | -4.579991 |
| 47            | 1             | 0.639575                | 5.075513  | -2.969558 |
| 48            | 6             | -1.262967               | 2.971785  | -5.024185 |
| 49            | 1             | -0.459539               | 2.688961  | -5.713573 |
| 50            | 1             | -1.838140               | 3.779291  | -5.488885 |
| 51            | 1             | -1.927995               | 2.114508  | -4.884895 |
| 52            | 6             | 0.762694                | -0.468276 | -4.288434 |
| 53            | 1             | 0.898736                | -1.430885 | -4.783492 |
| 54            | 1             | 1.654974                | 0.142293  | -4.473360 |
| 55            | 1             | -0.094933               | 0.041265  | -4.730371 |
| 56            | 6             | 2.546743                | -2.232855 | -2.500651 |
| 57            | 1             | 2.706512                | -2.403007 | -3.572061 |

|    |   |           |           |           |
|----|---|-----------|-----------|-----------|
| 58 | 1 | 2.848317  | -3.138612 | -1.967295 |
| 59 | 1 | 3.213007  | -1.416394 | -2.198404 |
| 60 | 6 | -1.578269 | -4.019898 | -0.543825 |
| 61 | 1 | -2.608737 | -4.003075 | -0.175555 |
| 62 | 1 | -0.925953 | -4.263483 | 0.302776  |
| 63 | 1 | -1.489755 | -4.822198 | -1.287761 |
| 64 | 6 | -2.002211 | -2.407161 | -2.464538 |
| 65 | 1 | -1.860406 | -1.380935 | -2.809938 |
| 66 | 1 | -1.604001 | -3.066164 | -3.247149 |
| 67 | 6 | -3.515687 | -2.654896 | -2.338456 |
| 68 | 1 | -3.924021 | -2.152697 | -1.449099 |
| 69 | 1 | -3.748373 | -3.717017 | -2.226128 |
| 70 | 6 | -4.288100 | -2.123807 | -3.530890 |
| 71 | 8 | -3.924120 | -1.215285 | -4.268518 |
| 72 | 8 | -5.471928 | -2.765919 | -3.678618 |
| 73 | 6 | -6.353637 | -2.308256 | -4.773917 |
| 74 | 1 | -5.802611 | -2.401434 | -5.713660 |
| 75 | 1 | -6.583328 | -1.252259 | -4.606077 |
| 76 | 6 | -7.595137 | -3.180993 | -4.743868 |
| 77 | 1 | -8.276872 | -2.874259 | -5.544195 |
| 78 | 1 | -7.339636 | -4.234147 | -4.897436 |
| 79 | 1 | -8.122373 | -3.083903 | -3.789629 |

**TS6d-7d** (E = -1852.0292493 au)

| Center Number | Atomic Number | Coordinates (Angstroms) |           |           |
|---------------|---------------|-------------------------|-----------|-----------|
|               |               | X                       | Y         | Z         |
| 1             | 77            | 0.068537                | 0.305481  | 0.118465  |
| 2             | 6             | -0.160900               | 0.756998  | 2.229064  |
| 3             | 6             | 1.190413                | 0.389782  | 1.984321  |
| 4             | 6             | 1.785715                | 1.393013  | 1.087662  |
| 5             | 6             | 0.843629                | 2.425866  | 0.836488  |
| 6             | 6             | -0.392920               | 1.958671  | 1.410449  |
| 7             | 6             | -1.110805               | 0.121657  | 3.204993  |
| 8             | 1             | -0.784757               | -0.887210 | 3.465445  |
| 9             | 1             | -1.138891               | 0.714480  | 4.127825  |
| 10            | 1             | -2.125824               | 0.062056  | 2.809550  |
| 11            | 6             | 1.950370                | -0.736035 | 2.622143  |
| 12            | 1             | 2.653911                | -1.194028 | 1.922117  |
| 13            | 1             | 1.285916                | -1.516424 | 2.997928  |
| 14            | 1             | 2.527643                | -0.346086 | 3.470719  |
| 15            | 6             | 3.213741                | 1.373343  | 0.636361  |
| 16            | 1             | 3.847926                | 1.804931  | 1.423007  |
| 17            | 1             | 3.360250                | 1.957769  | -0.274089 |
| 18            | 1             | 3.560893                | 0.353446  | 0.453971  |
| 19            | 6             | 1.140874                | 3.721496  | 0.134792  |
| 20            | 1             | 0.258677                | 4.164689  | -0.322230 |
| 21            | 1             | 1.893553                | 3.584795  | -0.644087 |
| 22            | 1             | 1.537626                | 4.438446  | 0.865795  |
| 23            | 6             | -1.688284               | 2.719839  | 1.451222  |
| 24            | 9             | -1.842093               | 3.608105  | 0.422729  |
| 25            | 9             | -1.765041               | 3.450141  | 2.618404  |
| 26            | 9             | -2.789820               | 1.904820  | 1.425576  |
| 27            | 6             | 0.406151                | -0.327460 | -2.916708 |
| 28            | 7             | -0.114871               | 0.425796  | -2.005997 |
| 29            | 6             | 1.261064                | -1.452394 | -2.467833 |
| 30            | 6             | 0.799281                | -2.435719 | -1.679782 |
| 31            | 1             | 1.519112                | -3.219780 | -1.452775 |
| 32            | 6             | -0.712836               | -1.656170 | 0.174263  |
| 33            | 1             | -1.775951               | -1.521638 | 0.413414  |
| 34            | 1             | -0.253027               | -2.123384 | 1.049859  |

|    |   |           |           |           |
|----|---|-----------|-----------|-----------|
| 35 | 6 | -0.573882 | -2.620673 | -1.041153 |
| 36 | 8 | -1.046332 | 1.397321  | -2.486700 |
| 37 | 6 | -0.507111 | 2.574257  | -2.974262 |
| 38 | 8 | 0.676542  | 2.770684  | -3.011312 |
| 39 | 6 | -1.599649 | 3.513577  | -3.505055 |
| 40 | 6 | -3.005699 | 3.189591  | -2.951840 |
| 41 | 1 | -3.037177 | 3.264532  | -1.860934 |
| 42 | 1 | -3.334803 | 2.187125  | -3.239824 |
| 43 | 1 | -3.718809 | 3.911866  | -3.362547 |
| 44 | 6 | -1.203491 | 4.966241  | -3.141775 |
| 45 | 1 | -1.925592 | 5.654567  | -3.592595 |
| 46 | 1 | -0.207068 | 5.212151  | -3.518966 |
| 47 | 1 | -1.216731 | 5.125905  | -2.058447 |
| 48 | 6 | -1.595883 | 3.352711  | -5.054874 |
| 49 | 1 | -0.606690 | 3.565688  | -5.472605 |
| 50 | 1 | -2.311400 | 4.062204  | -5.483123 |
| 51 | 1 | -1.899125 | 2.344467  | -5.355853 |
| 52 | 6 | 0.204453  | -0.119551 | -4.392074 |
| 53 | 1 | 0.415148  | -1.044057 | -4.931745 |
| 54 | 1 | 0.885482  | 0.656617  | -4.761923 |
| 55 | 1 | -0.818204 | 0.195345  | -4.609186 |
| 56 | 6 | 2.677057  | -1.439799 | -3.017556 |
| 57 | 1 | 2.690803  | -1.463188 | -4.113661 |
| 58 | 1 | 3.228143  | -2.310658 | -2.652237 |
| 59 | 1 | 3.212758  | -0.535371 | -2.703154 |
| 60 | 6 | -0.602214 | -4.103253 | -0.533113 |
| 61 | 1 | 0.265317  | -4.256230 | 0.121602  |
| 62 | 1 | -0.461039 | -4.765716 | -1.398798 |
| 63 | 6 | -1.730986 | -2.419010 | -2.055157 |
| 64 | 1 | -1.826370 | -1.384400 | -2.387379 |
| 65 | 1 | -1.587134 | -3.056062 | -2.935588 |
| 66 | 1 | -2.685968 | -2.687220 | -1.592504 |
| 67 | 6 | -1.869500 | -4.523527 | 0.222591  |
| 68 | 1 | -2.758822 | -4.485221 | -0.415895 |
| 69 | 1 | -2.069159 | -3.845550 | 1.063350  |
| 70 | 6 | -1.777944 | -5.926146 | 0.790311  |
| 71 | 8 | -0.773114 | -6.626333 | 0.814714  |
| 72 | 8 | -2.971595 | -6.326456 | 1.294516  |
| 73 | 6 | -3.029986 | -7.670893 | 1.905677  |
| 74 | 1 | -2.301037 | -7.706565 | 2.720104  |
| 75 | 1 | -2.741735 | -8.402493 | 1.145732  |
| 76 | 6 | -4.451879 | -7.878286 | 2.395048  |
| 77 | 1 | -4.538758 | -8.867006 | 2.857921  |
| 78 | 1 | -4.725136 | -7.125953 | 3.141647  |
| 79 | 1 | -5.165285 | -7.824736 | 1.566647  |

**7d** (E = -1852.0356901 au)

| Center Number | Atomic Number | Coordinates (Angstroms) |           |          |
|---------------|---------------|-------------------------|-----------|----------|
|               |               | X                       | Y         | Z        |
| 1             | 77            | -0.188654               | 0.423418  | 0.133937 |
| 2             | 6             | -0.353321               | 1.597060  | 2.020424 |
| 3             | 6             | 0.402603                | 0.405326  | 2.254074 |
| 4             | 6             | 1.555940                | 0.452991  | 1.380243 |
| 5             | 6             | 1.556522                | 1.749514  | 0.685483 |
| 6             | 6             | 0.399594                | 2.449560  | 1.109149 |
| 7             | 6             | -1.638541               | 1.960299  | 2.703189 |
| 8             | 1             | -2.201599               | 1.067395  | 2.982615 |
| 9             | 1             | -1.414147               | 2.517747  | 3.622196 |
| 10            | 1             | -2.270696               | 2.589310  | 2.073303 |
| 11            | 6             | 0.109540                | -0.639137 | 3.294261 |

|    |   |           |           |           |
|----|---|-----------|-----------|-----------|
| 12 | 1 | 0.554021  | -1.603498 | 3.037336  |
| 13 | 1 | -0.965172 | -0.786067 | 3.429560  |
| 14 | 1 | 0.531136  | -0.324590 | 4.257280  |
| 15 | 6 | 2.685322  | -0.532584 | 1.366217  |
| 16 | 1 | 3.435789  | -0.230670 | 2.109465  |
| 17 | 1 | 3.174871  | -0.577546 | 0.391485  |
| 18 | 1 | 2.342618  | -1.537681 | 1.621255  |
| 19 | 6 | 2.650729  | 2.224576  | -0.226450 |
| 20 | 1 | 2.256000  | 2.749763  | -1.096714 |
| 21 | 1 | 3.265342  | 1.389849  | -0.567988 |
| 22 | 1 | 3.302303  | 2.915744  | 0.323372  |
| 23 | 6 | 0.027930  | 3.865108  | 0.831632  |
| 24 | 9 | 0.896243  | 4.512329  | 0.000997  |
| 25 | 9 | -0.005704 | 4.601359  | 2.005911  |
| 26 | 9 | -1.231364 | 4.008701  | 0.281360  |
| 27 | 6 | 0.370173  | -0.093040 | -2.904905 |
| 28 | 7 | -0.268840 | 0.532303  | -1.972401 |
| 29 | 6 | 1.327369  | -1.140180 | -2.494363 |
| 30 | 6 | 0.955931  | -2.177232 | -1.727390 |
| 31 | 1 | 1.741000  | -2.902839 | -1.523833 |
| 32 | 6 | -0.769183 | -1.582418 | 0.056944  |
| 33 | 1 | -1.866941 | -1.501369 | 0.130804  |
| 34 | 1 | -0.426211 | -2.042747 | 0.984482  |
| 35 | 6 | -0.407606 | -2.526602 | -1.134830 |
| 36 | 8 | -1.329304 | 1.377239  | -2.433362 |
| 37 | 6 | -0.979125 | 2.682261  | -2.741678 |
| 38 | 8 | 0.154154  | 3.069343  | -2.676979 |
| 39 | 6 | -2.206867 | 3.471108  | -3.214745 |
| 40 | 6 | -3.438046 | 3.197569  | -2.314732 |
| 41 | 1 | -3.239748 | 3.470189  | -1.273394 |
| 42 | 1 | -3.738119 | 2.146652  | -2.350734 |
| 43 | 1 | -4.276647 | 3.804701  | -2.671097 |
| 44 | 6 | -1.854935 | 4.975158  | -3.198253 |
| 45 | 1 | -2.714531 | 5.545990  | -3.563952 |
| 46 | 1 | -0.997529 | 5.191171  | -3.842253 |
| 47 | 1 | -1.620166 | 5.317368  | -2.185611 |
| 48 | 6 | -2.516690 | 3.021687  | -4.673025 |
| 49 | 1 | -1.655451 | 3.179720  | -5.331385 |
| 50 | 1 | -3.350592 | 3.619781  | -5.055034 |
| 51 | 1 | -2.808152 | 1.967642  | -4.714224 |
| 52 | 6 | 0.183216  | 0.196714  | -4.369815 |
| 53 | 1 | 0.561107  | -0.632133 | -4.969427 |
| 54 | 1 | 0.734340  | 1.103348  | -4.649039 |
| 55 | 1 | -0.870350 | 0.356939  | -4.606599 |
| 56 | 6 | 2.731198  | -1.004613 | -3.058835 |
| 57 | 1 | 2.736231  | -1.033166 | -4.154868 |
| 58 | 1 | 3.361096  | -1.821694 | -2.696566 |
| 59 | 1 | 3.189980  | -0.055036 | -2.756656 |
| 60 | 6 | -0.252419 | -3.988735 | -0.594703 |
| 61 | 1 | 0.563816  | -3.993630 | 0.138639  |
| 62 | 1 | 0.070686  | -4.628620 | -1.428049 |
| 63 | 6 | -1.518348 | -2.508757 | -2.219840 |
| 64 | 1 | -1.688833 | -1.511863 | -2.630694 |
| 65 | 1 | -1.260747 | -3.182657 | -3.045292 |
| 66 | 1 | -2.468920 | -2.841249 | -1.789984 |
| 67 | 6 | -1.501251 | -4.603140 | 0.051528  |
| 68 | 1 | -2.300658 | -4.769953 | -0.677087 |
| 69 | 1 | -1.917471 | -3.932257 | 0.816471  |
| 70 | 6 | -1.212301 | -5.926337 | 0.734126  |
| 71 | 8 | -0.103545 | -6.340903 | 1.050409  |
| 72 | 8 | -2.355619 | -6.611333 | 0.982053  |
| 73 | 6 | -2.226396 | -7.904277 | 1.687230  |
| 74 | 1 | -1.745741 | -7.718484 | 2.651838  |

|    |   |           |           |          |
|----|---|-----------|-----------|----------|
| 75 | 1 | -1.577225 | -8.552164 | 1.091847 |
| 76 | 6 | -3.625282 | -8.473199 | 1.839562 |
| 77 | 1 | -3.573753 | -9.435527 | 2.359831 |
| 78 | 1 | -4.262399 | -7.802133 | 2.424198 |
| 79 | 1 | -4.092001 | -8.637085 | 0.863168 |

**8** (E = -1852.0507585 au)

| Center Number | Atomic Number | Coordinates (Angstroms) |           |           |
|---------------|---------------|-------------------------|-----------|-----------|
|               |               | X                       | Y         | Z         |
| 1             | 77            | -0.228168               | 0.607405  | 0.214202  |
| 2             | 6             | -0.134407               | 1.885274  | 2.061977  |
| 3             | 6             | 0.350166                | 0.564658  | 2.347656  |
| 4             | 6             | 1.513235                | 0.330176  | 1.513894  |
| 5             | 6             | 1.748014                | 1.523595  | 0.729229  |
| 6             | 6             | 0.743194                | 2.492126  | 1.089683  |
| 7             | 6             | -1.302415               | 2.539643  | 2.743785  |
| 8             | 1             | -2.031450               | 1.798080  | 3.077106  |
| 9             | 1             | -0.942124               | 3.077010  | 3.630748  |
| 10            | 1             | -1.808662               | 3.256485  | 2.096402  |
| 11            | 6             | -0.152684               | -0.339944 | 3.438506  |
| 12            | 1             | 0.004722                | -1.393559 | 3.195007  |
| 13            | 1             | -1.219131               | -0.193458 | 3.626741  |
| 14            | 1             | 0.387512                | -0.129388 | 4.370565  |
| 15            | 6             | 2.436719                | -0.850859 | 1.616310  |
| 16            | 1             | 3.184295                | -0.665240 | 2.398613  |
| 17            | 1             | 2.966860                | -1.035413 | 0.679943  |
| 18            | 1             | 1.894829                | -1.761471 | 1.882681  |
| 19            | 6             | 2.929554                | 1.729157  | -0.176861 |
| 20            | 1             | 2.657120                | 2.210534  | -1.116724 |
| 21            | 1             | 3.421890                | 0.780856  | -0.394992 |
| 22            | 1             | 3.657937                | 2.376074  | 0.328245  |
| 23            | 6             | 0.663225                | 3.913227  | 0.660601  |
| 24            | 9             | 1.478529                | 4.214427  | -0.400049 |
| 25            | 9             | 1.031853                | 4.778730  | 1.681634  |
| 26            | 9             | -0.607706               | 4.311870  | 0.293589  |
| 27            | 6             | 0.441746                | 0.139212  | -2.834441 |
| 28            | 7             | -0.247888               | 0.670533  | -1.879183 |
| 29            | 6             | 1.376237                | -0.934152 | -2.449962 |
| 30            | 6             | 0.976142                | -1.972452 | -1.691648 |
| 31            | 1             | 1.746108                | -2.720141 | -1.510619 |
| 32            | 6             | -0.792820               | -1.428050 | 0.101301  |
| 33            | 1             | -1.882471               | -1.457428 | 0.209235  |
| 34            | 1             | -0.373495               | -1.880922 | 1.001333  |
| 35            | 6             | -0.393294               | -2.327959 | -1.115218 |
| 36            | 8             | -1.296189               | 1.544437  | -2.383631 |
| 37            | 6             | -2.325126               | 1.640657  | -1.534968 |
| 38            | 8             | -2.266541               | 1.161119  | -0.404049 |
| 39            | 6             | -3.533728               | 2.371337  | -2.102542 |
| 40            | 6             | -4.164435               | 1.465754  | -3.200735 |
| 41            | 1             | -4.470947               | 0.497317  | -2.791282 |
| 42            | 1             | -3.470873               | 1.296717  | -4.029466 |
| 43            | 1             | -5.054089               | 1.966858  | -3.594717 |
| 44            | 6             | -4.551861               | 2.617466  | -0.968291 |
| 45            | 1             | -5.420428               | 3.138494  | -1.381665 |
| 46            | 1             | -4.124381               | 3.239016  | -0.175218 |
| 47            | 1             | -4.892836               | 1.677530  | -0.524588 |
| 48            | 6             | -3.078575               | 3.720067  | -2.723400 |
| 49            | 1             | -2.608857               | 4.365026  | -1.973393 |
| 50            | 1             | -3.960014               | 4.237350  | -3.114586 |
| 51            | 1             | -2.376216               | 3.568834  | -3.547695 |

|    |   |           |           |           |
|----|---|-----------|-----------|-----------|
| 52 | 6 | 0.336408  | 0.561591  | -4.275363 |
| 53 | 1 | 1.047336  | 1.377686  | -4.463224 |
| 54 | 1 | -0.660002 | 0.923787  | -4.525408 |
| 55 | 1 | 0.598159  | -0.269937 | -4.931977 |
| 56 | 6 | 2.769947  | -0.864388 | -3.051609 |
| 57 | 1 | 2.743947  | -0.968114 | -4.143134 |
| 58 | 1 | 3.389605  | -1.672557 | -2.653568 |
| 59 | 1 | 3.262317  | 0.088906  | -2.827548 |
| 60 | 6 | -0.246088 | -3.809199 | -0.617317 |
| 61 | 1 | 0.566404  | -3.840713 | 0.119165  |
| 62 | 1 | 0.076148  | -4.426327 | -1.468139 |
| 63 | 6 | -1.487582 | -2.296432 | -2.219715 |
| 64 | 1 | -1.628343 | -1.306605 | -2.656496 |
| 65 | 1 | -1.233151 | -2.990637 | -3.029361 |
| 66 | 1 | -2.452244 | -2.599473 | -1.799622 |
| 67 | 6 | -1.501283 | -4.437080 | 0.004156  |
| 68 | 1 | -2.312132 | -4.538963 | -0.723815 |
| 69 | 1 | -1.893316 | -3.807824 | 0.815260  |
| 70 | 6 | -1.235217 | -5.807491 | 0.595671  |
| 71 | 8 | -0.133422 | -6.264716 | 0.875556  |
| 72 | 8 | -2.391237 | -6.484337 | 0.805737  |
| 73 | 6 | -2.285737 | -7.824429 | 1.420438  |
| 74 | 1 | -1.800169 | -7.714771 | 2.394246  |
| 75 | 1 | -1.650218 | -8.442407 | 0.780235  |
| 76 | 6 | -3.695229 | -8.375608 | 1.537522  |
| 77 | 1 | -3.661488 | -9.372436 | 1.989822  |
| 78 | 1 | -4.318143 | -7.734446 | 2.169136  |
| 79 | 1 | -4.166837 | -8.462400 | 0.553604  |

**TS8-9** (E = -1852.0411624 au)

| Center Number | Atomic Number | Coordinates (Angstroms) |           |           |
|---------------|---------------|-------------------------|-----------|-----------|
|               |               | X                       | Y         | Z         |
| 1             | 77            | -0.153615               | 0.636659  | 0.120424  |
| 2             | 6             | -0.140273               | 1.869823  | 2.085363  |
| 3             | 6             | 0.346360                | 0.545169  | 2.314675  |
| 4             | 6             | 1.540755                | 0.359793  | 1.505825  |
| 5             | 6             | 1.782925                | 1.587244  | 0.782352  |
| 6             | 6             | 0.745386                | 2.517581  | 1.154162  |
| 7             | 6             | -1.333409               | 2.485525  | 2.757965  |
| 8             | 1             | -2.073561               | 1.727742  | 3.022975  |
| 9             | 1             | -1.007354               | 2.973395  | 3.685675  |
| 10            | 1             | -1.816322               | 3.237261  | 2.132417  |
| 11            | 6             | -0.172278               | -0.409716 | 3.353970  |
| 12            | 1             | -0.001776               | -1.451052 | 3.071334  |
| 13            | 1             | -1.242958               | -0.277691 | 3.527231  |
| 14            | 1             | 0.348405                | -0.234796 | 4.304152  |
| 15            | 6             | 2.480133                | -0.810798 | 1.590889  |
| 16            | 1             | 3.219828                | -0.629667 | 2.381335  |
| 17            | 1             | 3.017832                | -0.971572 | 0.653975  |
| 18            | 1             | 1.950402                | -1.734148 | 1.837087  |
| 19            | 6             | 2.984649                | 1.853693  | -0.081547 |
| 20            | 1             | 2.722852                | 2.349747  | -1.017489 |
| 21            | 1             | 3.510727                | 0.925831  | -0.310524 |
| 22            | 1             | 3.678861                | 2.508255  | 0.459258  |
| 23            | 6             | 0.632871                | 3.954036  | 0.770127  |
| 24            | 9             | 1.532315                | 4.337432  | -0.187937 |
| 25            | 9             | 0.850911                | 4.783591  | 1.858296  |
| 26            | 9             | -0.615238               | 4.298883  | 0.292440  |
| 27            | 6             | 0.711214                | 0.204922  | -2.806557 |
| 28            | 7             | 0.069207                | 0.649951  | -1.800987 |

|    |   |           |           |           |
|----|---|-----------|-----------|-----------|
| 29 | 6 | 1.571240  | -0.970156 | -2.494312 |
| 30 | 6 | 1.086825  | -2.014006 | -1.795525 |
| 31 | 1 | 1.794749  | -2.829234 | -1.660346 |
| 32 | 6 | -0.659935 | -1.419056 | 0.011506  |
| 33 | 1 | -1.740322 | -1.461350 | 0.172947  |
| 34 | 1 | -0.181167 | -1.867781 | 0.881742  |
| 35 | 6 | -0.305949 | -2.291239 | -1.234758 |
| 36 | 8 | -1.351368 | 1.610371  | -2.468572 |
| 37 | 6 | -2.294357 | 1.546577  | -1.613048 |
| 38 | 8 | -2.165425 | 1.053152  | -0.459300 |
| 39 | 6 | -3.661623 | 2.108680  | -2.057771 |
| 40 | 6 | -4.177288 | 1.226909  | -3.227123 |
| 41 | 1 | -4.302791 | 0.184172  | -2.914978 |
| 42 | 1 | -3.494238 | 1.258774  | -4.080893 |
| 43 | 1 | -5.153094 | 1.603799  | -3.550681 |
| 44 | 6 | -4.658428 | 2.069196  | -0.881050 |
| 45 | 1 | -5.620118 | 2.466893  | -1.221359 |
| 46 | 1 | -4.312610 | 2.680359  | -0.041617 |
| 47 | 1 | -4.816152 | 1.048213  | -0.521552 |
| 48 | 6 | -3.458058 | 3.568605  | -2.540463 |
| 49 | 1 | -3.059852 | 4.200540  | -1.738958 |
| 50 | 1 | -4.425600 | 3.978536  | -2.847883 |
| 51 | 1 | -2.775766 | 3.615058  | -3.393984 |
| 52 | 6 | 0.660537  | 0.762658  | -4.203127 |
| 53 | 1 | 1.681337  | 0.984832  | -4.530454 |
| 54 | 1 | 0.057971  | 1.665411  | -4.258797 |
| 55 | 1 | 0.254603  | 0.006914  | -4.885300 |
| 56 | 6 | 2.976430  | -0.956640 | -3.068062 |
| 57 | 1 | 2.962191  | -1.027905 | -4.162195 |
| 58 | 1 | 3.542378  | -1.809428 | -2.683405 |
| 59 | 1 | 3.517107  | -0.040237 | -2.804939 |
| 60 | 6 | -0.261443 | -3.794255 | -0.779431 |
| 61 | 1 | 0.556622  | -3.903967 | -0.055309 |
| 62 | 1 | 0.009067  | -4.404260 | -1.651649 |
| 63 | 6 | -1.387324 | -2.146492 | -2.343515 |
| 64 | 1 | -1.438042 | -1.140520 | -2.761272 |
| 65 | 1 | -1.184690 | -2.845207 | -3.163289 |
| 66 | 1 | -2.376933 | -2.375386 | -1.934780 |
| 67 | 6 | -1.548614 | -4.353970 | -0.160564 |
| 68 | 1 | -2.385662 | -4.318414 | -0.868859 |
| 69 | 1 | -1.864271 | -3.770379 | 0.712337  |
| 70 | 6 | -1.399195 | -5.796129 | 0.283797  |
| 71 | 8 | -0.404968 | -6.494333 | 0.127366  |
| 72 | 8 | -2.527634 | -6.240355 | 0.890080  |
| 73 | 6 | -2.528828 | -7.638818 | 1.369505  |
| 74 | 1 | -1.695286 | -7.759897 | 2.066779  |
| 75 | 1 | -2.362892 | -8.292991 | 0.509006  |
| 76 | 6 | -3.873191 | -7.884548 | 2.030007  |
| 77 | 1 | -3.916085 | -8.914705 | 2.399193  |
| 78 | 1 | -4.023489 | -7.210450 | 2.879146  |
| 79 | 1 | -4.693407 | -7.741438 | 1.319538  |

9 (E = -1852.0570464 au)

| Center Number | Atomic Number | Coordinates (Angstroms) |          |           |
|---------------|---------------|-------------------------|----------|-----------|
|               |               | X                       | Y        | Z         |
| 1             | 77            | 0.276032                | 0.778626 | -0.145370 |
| 2             | 6             | -0.204031               | 1.767594 | 1.949277  |
| 3             | 6             | 0.618883                | 0.626803 | 2.159654  |
| 4             | 6             | 1.877657                | 0.813577 | 1.449687  |
| 5             | 6             | 1.837572                | 2.093467 | 0.801727  |

|    |   |           |           |           |
|----|---|-----------|-----------|-----------|
| 6  | 6 | 0.519605  | 2.652310  | 1.073436  |
| 7  | 6 | -1.564905 | 1.985460  | 2.542936  |
| 8  | 1 | -1.830677 | 1.164822  | 3.210703  |
| 9  | 1 | -1.576385 | 2.916128  | 3.120375  |
| 10 | 1 | -2.330199 | 2.064570  | 1.766659  |
| 11 | 6 | 0.304084  | -0.505450 | 3.092453  |
| 12 | 1 | 0.978241  | -1.351491 | 2.951204  |
| 13 | 1 | -0.724074 | -0.858856 | 2.983440  |
| 14 | 1 | 0.428962  | -0.153837 | 4.124572  |
| 15 | 6 | 3.069678  | -0.091632 | 1.556971  |
| 16 | 1 | 3.557467  | 0.068896  | 2.526944  |
| 17 | 1 | 3.802325  | 0.107638  | 0.773352  |
| 18 | 1 | 2.787685  | -1.145634 | 1.497760  |
| 19 | 6 | 2.986536  | 2.764223  | 0.104681  |
| 20 | 1 | 2.660146  | 3.361899  | -0.746284 |
| 21 | 1 | 3.716530  | 2.031440  | -0.242987 |
| 22 | 1 | 3.491463  | 3.430728  | 0.815565  |
| 23 | 6 | 0.078973  | 4.035318  | 0.693736  |
| 24 | 9 | 0.530363  | 4.425473  | -0.539552 |
| 25 | 9 | 0.562994  | 4.959543  | 1.597000  |
| 26 | 9 | -1.281440 | 4.174663  | 0.681373  |
| 27 | 6 | 1.432215  | -0.034865 | -2.844149 |
| 28 | 7 | 0.938505  | 0.502343  | -1.823982 |
| 29 | 6 | 1.969782  | -1.413815 | -2.643099 |
| 30 | 6 | 1.300718  | -2.321637 | -1.912925 |
| 31 | 1 | 1.798308  | -3.283550 | -1.811823 |
| 32 | 6 | -0.135653 | -1.351348 | -0.016335 |
| 33 | 1 | -1.135612 | -1.346367 | 0.411855  |
| 34 | 1 | 0.582382  | -1.730620 | 0.706701  |
| 35 | 6 | -0.088119 | -2.254086 | -1.275063 |
| 36 | 8 | -1.573366 | 1.783781  | -2.619710 |
| 37 | 6 | -2.244098 | 1.346721  | -1.694495 |
| 38 | 8 | -1.763018 | 0.780441  | -0.611435 |
| 39 | 6 | -3.795991 | 1.449596  | -1.711264 |
| 40 | 6 | -4.299508 | 0.963458  | -3.092780 |
| 41 | 1 | -4.075129 | -0.098583 | -3.246663 |
| 42 | 1 | -3.838391 | 1.535497  | -3.902651 |
| 43 | 1 | -5.386531 | 1.091005  | -3.150378 |
| 44 | 6 | -4.467138 | 0.625200  | -0.593340 |
| 45 | 1 | -5.555649 | 0.729017  | -0.670781 |
| 46 | 1 | -4.162079 | 0.969551  | 0.399143  |
| 47 | 1 | -4.219898 | -0.438603 | -0.675531 |
| 48 | 6 | -4.141563 | 2.953062  | -1.531379 |
| 49 | 1 | -3.791588 | 3.328975  | -0.563038 |
| 50 | 1 | -5.228785 | 3.085413  | -1.573952 |
| 51 | 1 | -3.687543 | 3.556396  | -2.323873 |
| 52 | 6 | 1.512528  | 0.695885  | -4.165985 |
| 53 | 1 | 2.557614  | 0.930451  | -4.396074 |
| 54 | 1 | 0.934938  | 1.619845  | -4.124184 |
| 55 | 1 | 1.122573  | 0.053440  | -4.962092 |
| 56 | 6 | 3.315339  | -1.693114 | -3.281178 |
| 57 | 1 | 3.262017  | -1.607802 | -4.373009 |
| 58 | 1 | 3.645560  | -2.705847 | -3.033552 |
| 59 | 1 | 4.079514  | -0.987463 | -2.932736 |
| 60 | 6 | -0.363119 | -3.719457 | -0.759252 |
| 61 | 1 | 0.428018  | -3.992285 | -0.049415 |
| 62 | 1 | -0.248872 | -4.385849 | -1.623959 |
| 63 | 6 | -1.164310 | -1.886640 | -2.328038 |
| 64 | 1 | -0.978937 | -0.920491 | -2.796420 |
| 65 | 1 | -1.185674 | -2.650880 | -3.112743 |
| 66 | 1 | -2.154085 | -1.838216 | -1.865633 |
| 67 | 6 | -1.731365 | -3.978566 | -0.114606 |
| 68 | 1 | -2.552645 | -3.722876 | -0.793683 |

|    |   |           |           |          |
|----|---|-----------|-----------|----------|
| 69 | 1 | -1.880010 | -3.370463 | 0.786006 |
| 70 | 6 | -1.915825 | -5.428918 | 0.289737 |
| 71 | 8 | -1.076716 | -6.314332 | 0.182135 |
| 72 | 8 | -3.153479 | -5.636427 | 0.800583 |
| 73 | 6 | -3.481720 | -7.010209 | 1.238111 |
| 74 | 1 | -2.763510 | -7.301809 | 2.009396 |
| 75 | 1 | -3.363440 | -7.676774 | 0.379391 |
| 76 | 6 | -4.907952 | -6.985381 | 1.756835 |
| 77 | 1 | -5.192490 | -7.988538 | 2.091584 |
| 78 | 1 | -5.007041 | -6.300955 | 2.605245 |
| 79 | 1 | -5.606534 | -6.675495 | 0.973281 |

**TS9-10** (E = -1852.0423927 au)

| Center Number | Atomic Number | Coordinates (Angstroms) |           |           |
|---------------|---------------|-------------------------|-----------|-----------|
|               |               | X                       | Y         | Z         |
| 1             | 77            | 0.306279                | 0.861738  | -0.002915 |
| 2             | 6             | 1.126188                | 0.730873  | 2.068945  |
| 3             | 6             | 2.007958                | 1.545565  | 1.292393  |
| 4             | 6             | 1.267659                | 2.715527  | 0.850096  |
| 5             | 6             | -0.080033               | 2.626125  | 1.340101  |
| 6             | 6             | -0.183402               | 1.380900  | 2.057372  |
| 7             | 6             | 1.523902                | -0.487930 | 2.848419  |
| 8             | 1             | 2.371587                | -0.997227 | 2.385384  |
| 9             | 1             | 1.833928                | -0.171199 | 3.852949  |
| 10            | 1             | 0.705082                | -1.198404 | 2.964527  |
| 11            | 6             | 3.474784                | 1.309484  | 1.075786  |
| 12            | 1             | 3.800243                | 1.682961  | 0.102265  |
| 13            | 1             | 3.726622                | 0.248641  | 1.133494  |
| 14            | 1             | 4.047562                | 1.836571  | 1.849045  |
| 15            | 6             | 1.818760                | 3.854789  | 0.050460  |
| 16            | 1             | 2.010488                | 4.704986  | 0.718465  |
| 17            | 1             | 1.111248                | 4.174718  | -0.717866 |
| 18            | 1             | 2.758477                | 3.586576  | -0.435495 |
| 19            | 6             | -1.134858               | 3.678663  | 1.155653  |
| 20            | 1             | -2.111869               | 3.246807  | 0.939366  |
| 21            | 1             | -0.866287               | 4.354001  | 0.343201  |
| 22            | 1             | -1.221231               | 4.265441  | 2.078633  |
| 23            | 6             | -1.344242               | 0.927237  | 2.887098  |
| 24            | 9             | -2.527852               | 1.516192  | 2.544220  |
| 25            | 9             | -1.132744               | 1.211744  | 4.220231  |
| 26            | 9             | -1.548941               | -0.432616 | 2.815108  |
| 27            | 6             | 1.704884                | -0.723440 | -2.296319 |
| 28            | 7             | 1.062932                | -0.102762 | -1.409414 |
| 29            | 6             | 1.816271                | -2.205040 | -2.344088 |
| 30            | 6             | 0.840445                | -2.978333 | -1.854959 |
| 31            | 1             | 0.956668                | -4.051994 | -1.972842 |
| 32            | 6             | -0.259798               | -1.544772 | -0.087487 |
| 33            | 1             | -1.186741               | -1.179957 | 0.340774  |
| 34            | 1             | 0.486625                | -1.852041 | 0.635114  |
| 35            | 6             | -0.465545               | -2.528936 | -1.214264 |
| 36            | 8             | -0.745133               | 2.836636  | -2.222372 |
| 37            | 6             | -1.623338               | 2.024099  | -1.943758 |
| 38            | 8             | -1.478574               | 1.036371  | -1.098233 |
| 39            | 6             | -3.018098               | 2.093411  | -2.620182 |
| 40            | 6             | -2.838576               | 1.584716  | -4.076759 |
| 41            | 1             | -2.516888               | 0.537160  | -4.095294 |
| 42            | 1             | -2.097374               | 2.186957  | -4.612366 |
| 43            | 1             | -3.793008               | 1.656227  | -4.611195 |
| 44            | 6             | -4.074379               | 1.234286  | -1.893169 |
| 45            | 1             | -5.041216               | 1.338735  | -2.399447 |

|    |   |           |           |           |
|----|---|-----------|-----------|-----------|
| 46 | 1 | -4.198981 | 1.553077  | -0.852328 |
| 47 | 1 | -3.800747 | 0.175725  | -1.892798 |
| 48 | 6 | -3.479835 | 3.571027  | -2.644401 |
| 49 | 1 | -3.618805 | 3.959851  | -1.628496 |
| 50 | 1 | -4.438862 | 3.647136  | -3.169686 |
| 51 | 1 | -2.749635 | 4.202353  | -3.157913 |
| 52 | 6 | 2.371896  | 0.118548  | -3.378454 |
| 53 | 1 | 3.457150  | -0.018808 | -3.331782 |
| 54 | 1 | 2.136979  | 1.174276  | -3.241713 |
| 55 | 1 | 2.023844  | -0.207967 | -4.364239 |
| 56 | 6 | 3.042650  | -2.780647 | -3.023576 |
| 57 | 1 | 3.095201  | -2.493868 | -4.080074 |
| 58 | 1 | 3.017767  | -3.872429 | -2.970761 |
| 59 | 1 | 3.965597  | -2.436698 | -2.541375 |
| 60 | 6 | -1.056347 | -3.815393 | -0.503893 |
| 61 | 1 | -0.323676 | -4.185900 | 0.223549  |
| 62 | 1 | -1.125302 | -4.577113 | -1.290521 |
| 63 | 6 | -1.445680 | -2.036047 | -2.307421 |
| 64 | 1 | -1.011548 | -1.216126 | -2.882148 |
| 65 | 1 | -1.674792 | -2.859263 | -2.992148 |
| 66 | 1 | -2.378426 | -1.673530 | -1.868577 |
| 67 | 6 | -2.427385 | -3.670850 | 0.170012  |
| 68 | 1 | -3.171524 | -3.250579 | -0.516976 |
| 69 | 1 | -2.395496 | -2.998814 | 1.035378  |
| 70 | 6 | -2.965482 | -5.005872 | 0.651728  |
| 71 | 8 | -2.421752 | -6.091247 | 0.491976  |
| 72 | 8 | -4.149554 | -4.851903 | 1.287784  |
| 73 | 6 | -4.805121 | -6.076602 | 1.797072  |
| 74 | 1 | -4.120958 | -6.559617 | 2.500056  |
| 75 | 1 | -4.970205 | -6.748573 | 0.950381  |
| 76 | 6 | -6.103207 | -5.647952 | 2.456020  |
| 77 | 1 | -6.622956 | -6.529566 | 2.845768  |
| 78 | 1 | -5.914964 | -4.965239 | 3.290575  |
| 79 | 1 | -6.763847 | -5.151029 | 1.738699  |

**10** (E = -1852.1372748 au)

| Center Number | Atomic Number | Coordinates (Angstroms) |           |           |
|---------------|---------------|-------------------------|-----------|-----------|
|               |               | X                       | Y         | Z         |
| 1             | 77            | -0.090890               | 1.160497  | 0.129840  |
| 2             | 6             | -0.117864               | 1.205385  | 2.313437  |
| 3             | 6             | 1.183055                | 0.743003  | 1.908307  |
| 4             | 6             | 1.776194                | 1.761955  | 1.096190  |
| 5             | 6             | 0.868743                | 2.911502  | 1.044507  |
| 6             | 6             | -0.297896               | 2.553531  | 1.795269  |
| 7             | 6             | -1.075838               | 0.456966  | 3.188537  |
| 8             | 1             | -0.986614               | -0.621413 | 3.040546  |
| 9             | 1             | -0.840967               | 0.673212  | 4.239183  |
| 10            | 1             | -2.110987               | 0.750250  | 3.005683  |
| 11            | 6             | 1.825802                | -0.549809 | 2.321627  |
| 12            | 1             | 2.539318                | -0.904010 | 1.574321  |
| 13            | 1             | 1.087138                | -1.335579 | 2.493968  |
| 14            | 1             | 2.373303                | -0.394535 | 3.260093  |
| 15            | 6             | 3.159892                | 1.725205  | 0.519554  |
| 16            | 1             | 3.865933                | 2.109433  | 1.267642  |
| 17            | 1             | 3.250443                | 2.345460  | -0.373842 |
| 18            | 1             | 3.462032                | 0.706989  | 0.264943  |
| 19            | 6             | 1.172589                | 4.218220  | 0.381255  |
| 20            | 1             | 0.286519                | 4.625069  | -0.105147 |
| 21            | 1             | 1.966429                | 4.107038  | -0.359571 |
| 22            | 1             | 1.516785                | 4.931613  | 1.141642  |

|    |   |           |           |           |
|----|---|-----------|-----------|-----------|
| 23 | 6 | -1.434123 | 3.436675  | 2.219113  |
| 24 | 9 | -1.361540 | 4.706680  | 1.735261  |
| 25 | 9 | -1.437925 | 3.550687  | 3.600365  |
| 26 | 9 | -2.668448 | 2.936376  | 1.884721  |
| 27 | 6 | 1.045375  | -0.525660 | -2.192153 |
| 28 | 7 | 0.349814  | -0.513463 | -1.098877 |
| 29 | 6 | 1.280069  | -1.782765 | -2.939161 |
| 30 | 6 | 0.461585  | -2.821651 | -2.709533 |
| 31 | 1 | 0.553287  | -3.721786 | -3.311998 |
| 32 | 6 | -0.178487 | -1.803706 | -0.583336 |
| 33 | 1 | -1.000401 | -1.581385 | 0.095339  |
| 34 | 1 | 0.623666  | -2.265348 | 0.004459  |
| 35 | 6 | -0.640292 | -2.773286 | -1.680817 |
| 36 | 8 | -1.736756 | 3.703185  | -1.047531 |
| 37 | 6 | -2.049400 | 2.653633  | -1.582588 |
| 38 | 8 | -1.438461 | 1.497633  | -1.347543 |
| 39 | 6 | -3.181354 | 2.536474  | -2.624994 |
| 40 | 6 | -2.584018 | 2.015419  | -3.958674 |
| 41 | 1 | -2.136833 | 1.025769  | -3.830257 |
| 42 | 1 | -1.815833 | 2.698001  | -4.341762 |
| 43 | 1 | -3.377382 | 1.942520  | -4.711365 |
| 44 | 6 | -4.241688 | 1.532993  | -2.099728 |
| 45 | 1 | -5.059009 | 1.450750  | -2.825364 |
| 46 | 1 | -4.667963 | 1.870159  | -1.147104 |
| 47 | 1 | -3.806708 | 0.539947  | -1.955136 |
| 48 | 6 | -3.833076 | 3.916042  | -2.849966 |
| 49 | 1 | -4.260592 | 4.310305  | -1.922315 |
| 50 | 1 | -4.637568 | 3.825024  | -3.588496 |
| 51 | 1 | -3.104771 | 4.643623  | -3.222719 |
| 52 | 6 | 1.627231  | 0.741115  | -2.754047 |
| 53 | 1 | 2.722013  | 0.684308  | -2.759594 |
| 54 | 1 | 1.322808  | 1.617125  | -2.183126 |
| 55 | 1 | 1.306991  | 0.873209  | -3.793436 |
| 56 | 6 | 2.370287  | -1.827893 | -3.989662 |
| 57 | 1 | 2.191070  | -1.111435 | -4.799600 |
| 58 | 1 | 2.419345  | -2.827624 | -4.430206 |
| 59 | 1 | 3.353057  | -1.598922 | -3.560376 |
| 60 | 6 | -0.819705 | -4.199718 | -1.081618 |
| 61 | 1 | 0.153529  | -4.555281 | -0.719375 |
| 62 | 1 | -1.109014 | -4.868933 | -1.901551 |
| 63 | 6 | -1.943577 | -2.289411 | -2.369679 |
| 64 | 1 | -1.807696 | -1.297878 | -2.811672 |
| 65 | 1 | -2.230043 | -2.985240 | -3.166324 |
| 66 | 1 | -2.769738 | -2.228350 | -1.652908 |
| 67 | 6 | -1.852347 | -4.313117 | 0.049355  |
| 68 | 1 | -2.833242 | -3.933542 | -0.260897 |
| 69 | 1 | -1.560148 | -3.720876 | 0.925747  |
| 70 | 6 | -2.051626 | -5.741702 | 0.518874  |
| 71 | 8 | -1.473373 | -6.726348 | 0.077186  |
| 72 | 8 | -2.972183 | -5.801849 | 1.511136  |
| 73 | 6 | -3.281380 | -7.137139 | 2.066495  |
| 74 | 1 | -2.356576 | -7.559863 | 2.468691  |
| 75 | 1 | -3.630239 | -7.772336 | 1.247708  |
| 76 | 6 | -4.340105 | -6.941905 | 3.136420  |
| 77 | 1 | -4.599542 | -7.911318 | 3.574848  |
| 78 | 1 | -3.975813 | -6.291005 | 3.937479  |
| 79 | 1 | -5.249810 | -6.503053 | 2.714693  |

11 (E = -1852.1476112 au)

| Center Number | Atomic Number | Coordinates (Angstroms) |  |  |
|---------------|---------------|-------------------------|--|--|
|---------------|---------------|-------------------------|--|--|

|    |    | X         | Y         | Z         |
|----|----|-----------|-----------|-----------|
| 1  | 77 | 1.258692  | -0.062546 | -0.367314 |
| 2  | 6  | 1.454778  | -2.134659 | -1.074774 |
| 3  | 6  | 0.959136  | -1.325412 | -2.153768 |
| 4  | 6  | 1.948706  | -0.305939 | -2.451950 |
| 5  | 6  | 3.059470  | -0.476560 | -1.557090 |
| 6  | 6  | 2.741014  | -1.592933 | -0.679242 |
| 7  | 6  | 0.762863  | -3.336436 | -0.503114 |
| 8  | 1  | -0.297136 | -3.339170 | -0.762127 |
| 9  | 1  | 1.216235  | -4.242523 | -0.926060 |
| 10 | 1  | 0.858188  | -3.387985 | 0.581844  |
| 11 | 6  | -0.287331 | -1.589465 | -2.949110 |
| 12 | 1  | -0.668566 | -0.678426 | -3.415364 |
| 13 | 1  | -1.081716 | -2.019560 | -2.335450 |
| 14 | 1  | -0.058010 | -2.303023 | -3.751236 |
| 15 | 6  | 1.868186  | 0.657833  | -3.600957 |
| 16 | 1  | 2.194156  | 0.149983  | -4.517824 |
| 17 | 1  | 2.509017  | 1.528609  | -3.454339 |
| 18 | 1  | 0.845879  | 1.008564  | -3.761070 |
| 19 | 6  | 4.330696  | 0.322293  | -1.568449 |
| 20 | 1  | 4.606790  | 0.664227  | -0.569614 |
| 21 | 1  | 4.246112  | 1.190153  | -2.223849 |
| 22 | 1  | 5.147411  | -0.306588 | -1.944433 |
| 23 | 6  | 3.681796  | -2.230652 | 0.292343  |
| 24 | 9  | 4.592929  | -1.352948 | 0.818934  |
| 25 | 9  | 4.416838  | -3.229770 | -0.319102 |
| 26 | 9  | 3.046962  | -2.819923 | 1.356049  |
| 27 | 6  | -0.182084 | 2.613716  | -0.923132 |
| 28 | 7  | -0.302577 | 1.368050  | -0.581552 |
| 29 | 6  | -1.369389 | 3.463034  | -1.178417 |
| 30 | 6  | -2.563523 | 3.052846  | -0.724443 |
| 31 | 1  | -3.430551 | 3.699314  | -0.834885 |
| 32 | 6  | -1.662201 | 0.784210  | -0.476166 |
| 33 | 1  | -1.588218 | -0.072201 | 0.190964  |
| 34 | 1  | -1.923397 | 0.414835  | -1.474468 |
| 35 | 6  | -2.750778 | 1.752706  | 0.013088  |
| 36 | 8  | 1.971846  | 1.184942  | 1.290138  |
| 37 | 6  | 1.202630  | 0.614606  | 2.132353  |
| 38 | 8  | 0.435569  | -0.287276 | 1.663781  |
| 39 | 6  | 1.252189  | 0.968014  | 3.612414  |
| 40 | 6  | 0.089513  | 0.297391  | 4.374326  |
| 41 | 1  | 0.126371  | -0.792235 | 4.280435  |
| 42 | 1  | -0.882591 | 0.640571  | 4.006328  |
| 43 | 1  | 0.161452  | 0.552904  | 5.436805  |
| 44 | 6  | 2.613162  | 0.442989  | 4.156517  |
| 45 | 1  | 2.687659  | 0.682692  | 5.222590  |
| 46 | 1  | 3.453397  | 0.912748  | 3.636153  |
| 47 | 1  | 2.693314  | -0.643988 | 4.044217  |
| 48 | 6  | 1.190324  | 2.508540  | 3.772088  |
| 49 | 1  | 2.009259  | 2.994679  | 3.234060  |
| 50 | 1  | 1.272847  | 2.764163  | 4.833775  |
| 51 | 1  | 0.241456  | 2.910444  | 3.399614  |
| 52 | 6  | 1.171820  | 3.251755  | -1.066142 |
| 53 | 1  | 1.325195  | 3.588378  | -2.097741 |
| 54 | 1  | 1.973107  | 2.571542  | -0.786486 |
| 55 | 1  | 1.232791  | 4.140737  | -0.428110 |
| 56 | 6  | -1.189886 | 4.794032  | -1.880023 |
| 57 | 1  | -0.542860 | 5.473728  | -1.313604 |
| 58 | 1  | -2.161388 | 5.280715  | -2.003709 |
| 59 | 1  | -0.744826 | 4.670662  | -2.874484 |
| 60 | 6  | -4.154787 | 1.180599  | -0.343907 |
| 61 | 1  | -4.235795 | 1.109058  | -1.436377 |

|    |   |           |           |           |
|----|---|-----------|-----------|-----------|
| 62 | 1 | -4.906341 | 1.913175  | -0.023987 |
| 63 | 6 | -2.636975 | 2.036557  | 1.534057  |
| 64 | 1 | -1.670177 | 2.489055  | 1.775968  |
| 65 | 1 | -3.424852 | 2.730231  | 1.849361  |
| 66 | 1 | -2.735949 | 1.114137  | 2.115783  |
| 67 | 6 | -4.485592 | -0.184579 | 0.276634  |
| 68 | 1 | -4.425118 | -0.152099 | 1.371761  |
| 69 | 1 | -3.778994 | -0.959607 | -0.043780 |
| 70 | 6 | -5.879300 | -0.664469 | -0.080998 |
| 71 | 8 | -6.714379 | -0.027037 | -0.710076 |
| 72 | 8 | -6.101502 | -1.913179 | 0.395572  |
| 73 | 6 | -7.431566 | -2.506639 | 0.139627  |
| 74 | 1 | -7.586196 | -2.539342 | -0.942370 |
| 75 | 1 | -8.186457 | -1.850641 | 0.581876  |
| 76 | 6 | -7.431765 | -3.889922 | 0.764349  |
| 77 | 1 | -8.403934 | -4.365801 | 0.597755  |
| 78 | 1 | -6.659711 | -4.524242 | 0.317530  |
| 79 | 1 | -7.258539 | -3.834721 | 1.843652  |

**12** (E = -1138.84453 au)

| Center Number | Atomic Number | Coordinates (Angstroms) |           |           |
|---------------|---------------|-------------------------|-----------|-----------|
|               |               | X                       | Y         | Z         |
| 1             | 77            | 1.604204                | -0.381215 | -0.261411 |
| 2             | 6             | 1.774440                | -2.296700 | -1.298273 |
| 3             | 6             | 1.080665                | -1.390207 | -2.153544 |
| 4             | 6             | 1.944425                | -0.249110 | -2.431619 |
| 5             | 6             | 3.190176                | -0.431295 | -1.757157 |
| 6             | 6             | 3.058536                | -1.666910 | -0.986951 |
| 7             | 6             | 1.279724                | -3.631701 | -0.829480 |
| 8             | 1             | 0.202827                | -3.723035 | -0.977891 |
| 9             | 1             | 1.771486                | -4.419661 | -1.414304 |
| 10            | 1             | 1.502636                | -3.805872 | 0.223617  |
| 11            | 6             | -0.291520               | -1.583723 | -2.724023 |
| 12            | 1             | -0.813970               | -0.631545 | -2.841951 |
| 13            | 1             | -0.904216               | -2.236583 | -2.099637 |
| 14            | 1             | -0.205880               | -2.044013 | -3.717125 |
| 15            | 6             | 1.575838                | 0.901495  | -3.316899 |
| 16            | 1             | 1.745905                | 0.617068  | -4.363683 |
| 17            | 1             | 2.174831                | 1.788576  | -3.104264 |
| 18            | 1             | 0.520544                | 1.164879  | -3.210587 |
| 19            | 6             | 4.390646                | 0.462659  | -1.843925 |
| 20            | 1             | 4.849870                | 0.629189  | -0.868956 |
| 21            | 1             | 4.127520                | 1.429569  | -2.274914 |
| 22            | 1             | 5.138974                | -0.007432 | -2.494619 |
| 23            | 6             | 4.167322                | -2.317804 | -0.203535 |
| 24            | 9             | 5.023068                | -1.414982 | 0.362119  |
| 25            | 9             | 4.916071                | -3.115030 | -1.037992 |
| 26            | 9             | 3.709550                | -3.115272 | 0.807841  |
| 27            | 8             | 2.147348                | 0.972652  | 1.333450  |
| 28            | 6             | 1.403070                | 0.375172  | 2.187797  |
| 29            | 8             | 0.771156                | -0.645826 | 1.755258  |
| 30            | 6             | 1.338536                | 0.822653  | 3.634873  |
| 31            | 6             | 0.035712                | 0.321375  | 4.296125  |
| 32            | 1             | -0.041791               | -0.768653 | 4.251654  |
| 33            | 1             | -0.847181               | 0.750667  | 3.810359  |
| 34            | 1             | 0.027730                | 0.625083  | 5.347912  |
| 35            | 6             | 2.573635                | 0.182593  | 4.341434  |
| 36            | 1             | 2.570769                | 0.482075  | 5.394607  |
| 37            | 1             | 3.509873                | 0.523912  | 3.888373  |
| 38            | 1             | 2.535591                | -0.910932 | 4.295450  |

|    |   |          |          |          |
|----|---|----------|----------|----------|
| 39 | 6 | 1.434234 | 2.365259 | 3.712343 |
| 40 | 1 | 2.354646 | 2.730487 | 3.248458 |
| 41 | 1 | 1.430690 | 2.672168 | 4.763250 |
| 42 | 1 | 0.581691 | 2.840992 | 3.215103 |

**13** (E = -713.2563588 au)

| Center Number | Atomic Number | Coordinates (Angstroms) |           |           |
|---------------|---------------|-------------------------|-----------|-----------|
|               |               | X                       | Y         | Z         |
| 1             | 6             | -0.103534               | 2.637228  | -0.812030 |
| 2             | 7             | -0.208527               | 1.391560  | -0.527005 |
| 3             | 6             | -1.281561               | 3.525086  | -1.030061 |
| 4             | 6             | -2.474624               | 3.094625  | -0.594059 |
| 5             | 1             | -3.346503               | 3.741354  | -0.672620 |
| 6             | 6             | -1.556706               | 0.817253  | -0.467795 |
| 7             | 1             | -1.497305               | -0.094086 | 0.132669  |
| 8             | 1             | -1.821382               | 0.504705  | -1.489411 |
| 9             | 6             | -2.657429               | 1.749413  | 0.076119  |
| 10            | 6             | 1.282673                | 3.235000  | -0.917911 |
| 11            | 1             | 1.462050                | 3.643166  | -1.920367 |
| 12            | 1             | 2.030214                | 2.465937  | -0.710194 |
| 13            | 1             | 1.412397                | 4.060468  | -0.206336 |
| 14            | 6             | -1.093067               | 4.880334  | -1.678336 |
| 15            | 1             | -0.411103               | 5.516450  | -1.100765 |
| 16            | 1             | -2.053160               | 5.399808  | -1.760225 |
| 17            | 1             | -0.670967               | 4.786714  | -2.687055 |
| 18            | 6             | -4.068410               | 1.209526  | -0.295380 |
| 19            | 1             | -4.160608               | 1.204522  | -1.389588 |
| 20            | 1             | -4.815195               | 1.924446  | 0.075717  |
| 21            | 6             | -2.522233               | 1.940011  | 1.610317  |
| 22            | 1             | -1.539606               | 2.352692  | 1.862880  |
| 23            | 1             | -3.289521               | 2.630789  | 1.980676  |
| 24            | 1             | -2.633296               | 0.986409  | 2.139769  |
| 25            | 6             | -4.401694               | -0.190219 | 0.240640  |
| 26            | 1             | -4.327887               | -0.230017 | 1.334527  |
| 27            | 1             | -3.698971               | -0.943231 | -0.137504 |
| 28            | 6             | -5.798067               | -0.646342 | -0.133861 |
| 29            | 8             | -6.616777               | 0.002237  | -0.773701 |
| 30            | 8             | -6.047508               | -1.894337 | 0.335874  |
| 31            | 6             | -7.377362               | -2.469770 | 0.045822  |
| 32            | 1             | -7.504842               | -2.501146 | -1.039860 |
| 33            | 1             | -8.135568               | -1.804106 | 0.467649  |
| 34            | 6             | -7.412833               | -3.852821 | 0.670455  |
| 35            | 1             | -8.386156               | -4.316356 | 0.477568  |
| 36            | 1             | -6.636891               | -4.497036 | 0.245069  |
| 37            | 1             | -7.268174               | -3.799347 | 1.754102  |

**1-CH<sub>3</sub>** (E = -723.2269077 au)

| Center Number | Atomic Number | Coordinates (Angstroms) |           |           |
|---------------|---------------|-------------------------|-----------|-----------|
|               |               | X                       | Y         | Z         |
| 1             | 77            | 0.215495                | -0.081518 | 0.629544  |
| 2             | 6             | 2.084743                | -0.403990 | -0.333950 |
| 3             | 6             | 1.269401                | -1.594470 | -0.536269 |
| 4             | 6             | 0.969755                | -2.165136 | 0.743550  |
| 5             | 6             | 1.572480                | -1.334374 | 1.754076  |
| 6             | 6             | 2.284035                | -0.247955 | 1.095580  |
| 7             | 6             | 2.705533                | 0.438967  | -1.402976 |
| 8             | 1             | 2.123341                | 0.411135  | -2.326937 |

|    |   |           |           |           |
|----|---|-----------|-----------|-----------|
| 9  | 1 | 3.710805  | 0.054596  | -1.623250 |
| 10 | 1 | 2.794129  | 1.477990  | -1.079575 |
| 11 | 6 | 0.854234  | -2.140261 | -1.867486 |
| 12 | 1 | -0.065667 | -2.724651 | -1.797498 |
| 13 | 1 | 0.705721  | -1.344687 | -2.601545 |
| 14 | 1 | 1.646191  | -2.801283 | -2.244881 |
| 15 | 6 | 0.165907  | -3.407596 | 0.993318  |
| 16 | 1 | 0.836248  | -4.276617 | 1.018928  |
| 17 | 1 | -0.358858 | -3.362727 | 1.950647  |
| 18 | 1 | -0.571929 | -3.576447 | 0.205510  |
| 19 | 6 | 1.520704  | -1.567407 | 3.232253  |
| 20 | 1 | 1.599701  | -0.631796 | 3.790644  |
| 21 | 1 | 0.598526  | -2.071963 | 3.529640  |
| 22 | 1 | 2.364833  | -2.206663 | 3.524411  |
| 23 | 6 | 3.151242  | 0.776621  | 1.756505  |
| 24 | 1 | 2.846618  | 0.955548  | 2.790100  |
| 25 | 1 | 4.188058  | 0.413909  | 1.765667  |
| 26 | 1 | 3.117488  | 1.724774  | 1.216942  |
| 27 | 8 | -0.576894 | 1.761273  | 0.703644  |
| 28 | 6 | -0.002015 | 2.949402  | 0.529697  |
| 29 | 8 | 1.178386  | 3.099989  | 0.272313  |
| 30 | 6 | -0.982318 | 4.094415  | 0.676988  |
| 31 | 1 | -1.446606 | 4.064846  | 1.668550  |
| 32 | 1 | -0.475370 | 5.050169  | 0.536824  |
| 33 | 1 | -1.784818 | 3.992905  | -0.061882 |

**14** (E = -1319.7612098 au)

| Center Number | Atomic Number | Coordinates (Angstroms) |           |           |
|---------------|---------------|-------------------------|-----------|-----------|
|               |               | X                       | Y         | Z         |
| 1             | 77            | -0.903234               | 0.045946  | 0.493128  |
| 2             | 6             | -1.087884               | -1.695530 | -0.797907 |
| 3             | 6             | -1.521505               | -0.538378 | -1.544648 |
| 4             | 6             | -2.630197               | 0.057727  | -0.852369 |
| 5             | 6             | -2.921127               | -0.767908 | 0.318911  |
| 6             | 6             | -1.985931               | -1.847441 | 0.340278  |
| 7             | 6             | -0.049567               | -2.689624 | -1.229870 |
| 8             | 1             | 0.737030                | -2.215504 | -1.819685 |
| 9             | 1             | -0.522800               | -3.464413 | -1.848272 |
| 10            | 1             | 0.414043                | -3.184449 | -0.372779 |
| 11            | 6             | -0.940667               | -0.095523 | -2.855014 |
| 12            | 1             | -1.209637               | 0.935833  | -3.090059 |
| 13            | 1             | 0.148238                | -0.182209 | -2.859305 |
| 14            | 1             | -1.337721               | -0.735423 | -3.653887 |
| 15            | 6             | -3.468566               | 1.213358  | -1.313521 |
| 16            | 1             | -4.351931               | 0.830607  | -1.842218 |
| 17            | 1             | -3.818317               | 1.816086  | -0.471471 |
| 18            | 1             | -2.922461               | 1.866811  | -1.995924 |
| 19            | 6             | -4.059378               | -0.542480 | 1.271172  |
| 20            | 1             | -3.884777               | -1.030749 | 2.232443  |
| 21            | 1             | -4.223602               | 0.522657  | 1.453612  |
| 22            | 1             | -4.981303               | -0.956574 | 0.842420  |
| 23            | 6             | -1.931958               | -2.966948 | 1.336769  |
| 24            | 1             | -2.406510               | -2.692340 | 2.281190  |
| 25            | 1             | -2.462267               | -3.837897 | 0.929894  |
| 26            | 1             | -0.902437               | -3.268991 | 1.545123  |
| 27            | 8             | 0.114167                | -0.317685 | 2.436481  |
| 28            | 6             | -0.390934               | 0.714701  | 2.976541  |
| 29            | 8             | -1.175699               | 1.414944  | 2.262584  |
| 30            | 6             | -0.049403               | 1.107625  | 4.385522  |
| 31            | 1             | 0.811013                | 1.787625  | 4.367783  |

|    |   |           |           |           |
|----|---|-----------|-----------|-----------|
| 32 | 1 | -0.887394 | 1.631450  | 4.850991  |
| 33 | 1 | 0.221052  | 0.228844  | 4.974920  |
| 34 | 6 | 0.997302  | 2.475358  | -0.413646 |
| 35 | 7 | 0.813347  | 1.284867  | 0.055344  |
| 36 | 6 | -0.155062 | 3.293820  | -0.872627 |
| 37 | 6 | -0.059932 | 3.821291  | -2.292703 |
| 38 | 1 | -0.961992 | 4.388382  | -2.537671 |
| 39 | 1 | 0.803815  | 4.482920  | -2.425470 |
| 40 | 1 | 0.044370  | 3.005133  | -3.017040 |
| 41 | 6 | 2.369415  | 3.090092  | -0.536831 |
| 42 | 1 | 2.289826  | 4.169290  | -0.670259 |
| 43 | 1 | 2.967308  | 2.881627  | 0.352411  |
| 44 | 1 | 2.897070  | 2.673728  | -1.403784 |
| 45 | 6 | -1.137833 | 3.624956  | -0.031639 |
| 46 | 1 | -1.930385 | 4.290030  | -0.356886 |
| 47 | 1 | -1.171391 | 3.262126  | 0.986613  |
| 48 | 8 | 2.026237  | 0.685797  | 0.531743  |
| 49 | 6 | 2.695985  | -0.103247 | -0.377797 |
| 50 | 8 | 2.355085  | -0.195990 | -1.526900 |
| 51 | 6 | 3.876275  | -0.811926 | 0.297746  |
| 52 | 6 | 3.301088  | -1.914072 | 1.232151  |
| 53 | 1 | 2.735168  | -2.659127 | 0.662133  |
| 54 | 1 | 4.132587  | -2.426729 | 1.727466  |
| 55 | 1 | 2.647389  | -1.486981 | 1.997815  |
| 56 | 6 | 4.755343  | -1.453166 | -0.797303 |
| 57 | 1 | 5.590050  | -1.979807 | -0.323470 |
| 58 | 1 | 4.187756  | -2.172991 | -1.394370 |
| 59 | 1 | 5.166760  | -0.695872 | -1.472997 |
| 60 | 6 | 4.714089  | 0.194544  | 1.129186  |
| 61 | 1 | 5.566080  | -0.334408 | 1.568899  |
| 62 | 1 | 5.106098  | 1.002873  | 0.501699  |
| 63 | 1 | 4.128447  | 0.633612  | 1.941331  |

**TS14-15** (E = -1319.7421682 au)

| Center Number | Atomic Number | Coordinates (Angstroms) |           |           |
|---------------|---------------|-------------------------|-----------|-----------|
|               |               | X                       | Y         | Z         |
| 1             | 77            | -0.969613               | 0.333763  | 0.198891  |
| 2             | 6             | -1.044649               | -1.671418 | -0.795517 |
| 3             | 6             | -1.479145               | -0.622622 | -1.716086 |
| 4             | 6             | -2.671506               | -0.035709 | -1.173664 |
| 5             | 6             | -2.934946               | -0.640167 | 0.116681  |
| 6             | 6             | -1.947275               | -1.682803 | 0.311571  |
| 7             | 6             | 0.048774                | -2.665862 | -1.060287 |
| 8             | 1             | 0.839385                | -2.240697 | -1.680290 |
| 9             | 1             | -0.373335               | -3.528604 | -1.593382 |
| 10            | 1             | 0.496888                | -3.033478 | -0.134051 |
| 11            | 6             | -0.887402               | -0.357475 | -3.071207 |
| 12            | 1             | -1.142995               | 0.641656  | -3.432007 |
| 13            | 1             | 0.201309                | -0.447057 | -3.051971 |
| 14            | 1             | -1.278338               | -1.087320 | -3.792500 |
| 15            | 6             | -3.544348               | 0.976200  | -1.853999 |
| 16            | 1             | -4.292930               | 0.444499  | -2.456192 |
| 17            | 1             | -4.081929               | 1.601492  | -1.137202 |
| 18            | 1             | -2.975104               | 1.624466  | -2.523954 |
| 19            | 6             | -4.140865               | -0.398398 | 0.981985  |
| 20            | 1             | -3.924016               | -0.602118 | 2.033667  |
| 21            | 1             | -4.491601               | 0.633566  | 0.902804  |
| 22            | 1             | -4.961791               | -1.059037 | 0.673208  |
| 23            | 6             | -1.899093               | -2.611285 | 1.488033  |
| 24            | 1             | -2.155892               | -2.095076 | 2.416595  |

|    |   |           |           |           |
|----|---|-----------|-----------|-----------|
| 25 | 1 | -2.627955 | -3.419052 | 1.340042  |
| 26 | 1 | -0.912448 | -3.063359 | 1.607946  |
| 27 | 8 | -0.405465 | 0.269871  | 2.270371  |
| 28 | 6 | -0.525043 | 1.295466  | 3.019195  |
| 29 | 8 | -0.897456 | 2.423150  | 2.600118  |
| 30 | 6 | -0.204533 | 1.124531  | 4.486546  |
| 31 | 1 | 0.537811  | 1.869457  | 4.789552  |
| 32 | 1 | -1.111322 | 1.302681  | 5.074915  |
| 33 | 1 | 0.170902  | 0.121317  | 4.690707  |
| 34 | 6 | 1.098730  | 2.450678  | -0.364282 |
| 35 | 7 | 0.976723  | 1.186692  | -0.065915 |
| 36 | 6 | -0.189063 | 3.101383  | -0.604369 |
| 37 | 6 | -0.257607 | 4.375764  | -1.403534 |
| 38 | 1 | -1.292876 | 4.713783  | -1.491614 |
| 39 | 1 | 0.324800  | 5.176200  | -0.930074 |
| 40 | 1 | 0.148464  | 4.235322  | -2.413686 |
| 41 | 6 | 2.393869  | 3.198085  | -0.444086 |
| 42 | 1 | 2.362882  | 4.065718  | 0.224765  |
| 43 | 1 | 3.249909  | 2.581885  | -0.178352 |
| 44 | 1 | 2.531687  | 3.580100  | -1.462519 |
| 45 | 6 | -1.262580 | 2.465618  | -0.041415 |
| 46 | 1 | -2.248661 | 2.888014  | -0.211780 |
| 47 | 1 | -1.100773 | 2.281184  | 1.224283  |
| 48 | 8 | 2.147622  | 0.567000  | 0.429954  |
| 49 | 6 | 2.805686  | -0.245930 | -0.474451 |
| 50 | 8 | 2.469660  | -0.325566 | -1.624409 |
| 51 | 6 | 3.991088  | -0.944385 | 0.200282  |
| 52 | 6 | 3.510500  | -1.715303 | 1.458060  |
| 53 | 1 | 2.766095  | -2.476120 | 1.198969  |
| 54 | 1 | 4.368359  | -2.222585 | 1.911835  |
| 55 | 1 | 3.076912  | -1.040997 | 2.201558  |
| 56 | 6 | 4.624363  | -1.921459 | -0.813033 |
| 57 | 1 | 5.477720  | -2.421082 | -0.343490 |
| 58 | 1 | 3.908566  | -2.687313 | -1.128618 |
| 59 | 1 | 4.979815  | -1.396766 | -1.705074 |
| 60 | 6 | 5.030200  | 0.136769  | 0.612337  |
| 61 | 1 | 5.902721  | -0.360049 | 1.049191  |
| 62 | 1 | 5.368948  | 0.714853  | -0.254921 |
| 63 | 1 | 4.620134  | 0.824196  | 1.358169  |

15 (E = -1319.7671807 au)

| Center Number | Atomic Number | Coordinates (Angstroms) |           |           |
|---------------|---------------|-------------------------|-----------|-----------|
|               |               | X                       | Y         | Z         |
| 1             | 77            | -0.977402               | 0.421975  | 0.027286  |
| 2             | 6             | -0.992367               | -1.766334 | -0.830667 |
| 3             | 6             | -1.492445               | -0.722664 | -1.736214 |
| 4             | 6             | -2.711500               | -0.188912 | -1.154762 |
| 5             | 6             | -2.838947               | -0.742373 | 0.159909  |
| 6             | 6             | -1.792114               | -1.762999 | 0.321638  |
| 7             | 6             | 0.134337                | -2.705244 | -1.153209 |
| 8             | 1             | 0.918363                | -2.212123 | -1.731416 |
| 9             | 1             | -0.250288               | -3.537303 | -1.758573 |
| 10            | 1             | 0.582937                | -3.129898 | -0.252005 |
| 11            | 6             | -1.021271               | -0.515755 | -3.149724 |
| 12            | 1             | -1.327469               | 0.460561  | -3.533495 |
| 13            | 1             | 0.067702                | -0.580649 | -3.217623 |
| 14            | 1             | -1.450264               | -1.287032 | -3.803570 |
| 15            | 6             | -3.682988               | 0.732060  | -1.834247 |
| 16            | 1             | -4.409395               | 0.134634  | -2.400253 |
| 17            | 1             | -4.238374               | 1.340331  | -1.115666 |

|    |   |           |           |           |
|----|---|-----------|-----------|-----------|
| 18 | 1 | -3.182092 | 1.402344  | -2.537686 |
| 19 | 6 | -3.979943 | -0.530927 | 1.117658  |
| 20 | 1 | -3.642100 | -0.572489 | 2.156974  |
| 21 | 1 | -4.465573 | 0.434730  | 0.956676  |
| 22 | 1 | -4.734584 | -1.316914 | 0.980163  |
| 23 | 6 | -1.651290 | -2.635547 | 1.535649  |
| 24 | 1 | -1.721429 | -2.049355 | 2.457590  |
| 25 | 1 | -2.457714 | -3.380267 | 1.556775  |
| 26 | 1 | -0.698009 | -3.168969 | 1.542966  |
| 27 | 8 | -0.657842 | 0.680823  | 2.212955  |
| 28 | 6 | -0.794360 | 1.643018  | 2.974487  |
| 29 | 8 | -1.074051 | 2.863227  | 2.564848  |
| 30 | 6 | -0.652889 | 1.504574  | 4.460218  |
| 31 | 1 | 0.145919  | 2.162474  | 4.818034  |
| 32 | 1 | -1.581459 | 1.818700  | 4.948603  |
| 33 | 1 | -0.427722 | 0.471750  | 4.722508  |
| 34 | 6 | 1.172180  | 2.458701  | -0.292546 |
| 35 | 7 | 1.003736  | 1.174929  | -0.108422 |
| 36 | 6 | -0.074979 | 3.158003  | -0.584299 |
| 37 | 6 | -0.063885 | 4.605571  | -1.027530 |
| 38 | 1 | -1.087926 | 4.949322  | -1.200589 |
| 39 | 1 | 0.390892  | 5.262773  | -0.275832 |
| 40 | 1 | 0.499389  | 4.736826  | -1.960309 |
| 41 | 6 | 2.488306  | 3.168920  | -0.212151 |
| 42 | 1 | 2.420298  | 3.994644  | 0.505168  |
| 43 | 1 | 3.303635  | 2.512792  | 0.084789  |
| 44 | 1 | 2.723581  | 3.611432  | -1.187608 |
| 45 | 6 | -1.187339 | 2.383565  | -0.437808 |
| 46 | 1 | -2.159483 | 2.830456  | -0.644481 |
| 47 | 1 | -1.113500 | 2.886625  | 1.580949  |
| 48 | 8 | 2.131592  | 0.467593  | 0.378451  |
| 49 | 6 | 2.829719  | -0.247418 | -0.571921 |
| 50 | 8 | 2.554039  | -0.207772 | -1.740772 |
| 51 | 6 | 3.984446  | -1.019390 | 0.079586  |
| 52 | 6 | 3.475524  | -1.843168 | 1.290793  |
| 53 | 1 | 2.708931  | -2.564932 | 0.988511  |
| 54 | 1 | 4.315050  | -2.401428 | 1.718392  |
| 55 | 1 | 3.059490  | -1.198496 | 2.069774  |
| 56 | 6 | 4.606349  | -1.956730 | -0.977650 |
| 57 | 1 | 5.441847  | -2.501816 | -0.526726 |
| 58 | 1 | 3.876370  | -2.687182 | -1.341524 |
| 59 | 1 | 4.984380  | -1.393965 | -1.836372 |
| 60 | 6 | 5.046330  | 0.012116  | 0.557215  |
| 61 | 1 | 5.900292  | -0.528076 | 0.979333  |
| 62 | 1 | 5.410748  | 0.623582  | -0.275979 |
| 63 | 1 | 4.644037  | 0.671959  | 1.331911  |

16 (E = -1090.600618 au)

| Center Number | Atomic Number | Coordinates (Angstroms) |           |           |
|---------------|---------------|-------------------------|-----------|-----------|
|               |               | X                       | Y         | Z         |
| 1             | 77            | 0.952582                | 0.179344  | -0.222441 |
| 2             | 6             | 0.856368                | -2.020538 | 0.571521  |
| 3             | 6             | 1.593434                | -1.047323 | 1.391940  |
| 4             | 6             | 2.772012                | -0.622879 | 0.637368  |
| 5             | 6             | 2.633335                | -1.159468 | -0.674723 |
| 6             | 6             | 1.468066                | -2.066216 | -0.686017 |
| 7             | 6             | -0.303214               | -2.839127 | 1.060639  |
| 8             | 1             | -0.962729               | -2.258252 | 1.709195  |
| 9             | 1             | 0.072844                | -3.690448 | 1.643796  |
| 10            | 1             | -0.896606               | -3.238079 | 0.234756  |

|    |   |           |           |           |
|----|---|-----------|-----------|-----------|
| 11 | 6 | 1.346481  | -0.795147 | 2.849187  |
| 12 | 1 | 1.778639  | 0.155458  | 3.170285  |
| 13 | 1 | 0.277065  | -0.781167 | 3.074112  |
| 14 | 1 | 1.808171  | -1.596754 | 3.442540  |
| 15 | 6 | 3.918553  | 0.182810  | 1.175581  |
| 16 | 1 | 4.643096  | -0.488793 | 1.653989  |
| 17 | 1 | 4.437787  | 0.727468  | 0.383117  |
| 18 | 1 | 3.586638  | 0.905010  | 1.926212  |
| 19 | 6 | 3.598406  | -1.005493 | -1.815423 |
| 20 | 1 | 3.076926  | -0.932953 | -2.774295 |
| 21 | 1 | 4.220631  | -0.115398 | -1.697038 |
| 22 | 1 | 4.261648  | -1.879795 | -1.862023 |
| 23 | 6 | 1.057788  | -2.886903 | -1.873194 |
| 24 | 1 | 1.737767  | -3.741878 | -1.986879 |
| 25 | 1 | 0.042566  | -3.275224 | -1.767093 |
| 26 | 1 | 1.108113  | -2.306088 | -2.799526 |
| 27 | 6 | -0.962650 | 2.423534  | -0.237410 |
| 28 | 7 | -0.954397 | 1.119693  | -0.166040 |
| 29 | 6 | 0.362285  | 3.033968  | -0.033288 |
| 30 | 6 | 0.488114  | 4.532186  | 0.135200  |
| 31 | 1 | 1.540831  | 4.803113  | 0.256336  |
| 32 | 1 | 0.095958  | 5.076829  | -0.732751 |
| 33 | 1 | -0.056736 | 4.889514  | 1.018660  |
| 34 | 6 | -2.180928 | 3.249840  | -0.495393 |
| 35 | 1 | -2.044247 | 3.820514  | -1.422340 |
| 36 | 1 | -3.085962 | 2.652788  | -0.579987 |
| 37 | 1 | -2.302110 | 3.981332  | 0.311665  |
| 38 | 6 | 1.386406  | 2.146812  | -0.002225 |
| 39 | 1 | 2.400370  | 2.517529  | 0.136675  |
| 40 | 8 | -2.155420 | 0.480047  | -0.561299 |
| 41 | 6 | -2.830228 | -0.161156 | 0.458383  |
| 42 | 8 | -2.471368 | -0.104795 | 1.603123  |
| 43 | 6 | -4.069887 | -0.879109 | -0.089991 |
| 44 | 6 | -3.689688 | -1.780864 | -1.293019 |
| 45 | 1 | -2.952397 | -2.538652 | -1.006486 |
| 46 | 1 | -4.587273 | -2.299987 | -1.645140 |
| 47 | 1 | -3.284394 | -1.195494 | -2.122887 |
| 48 | 6 | -4.683042 | -1.732804 | 1.040620  |
| 49 | 1 | -5.577362 | -2.238775 | 0.662950  |
| 50 | 1 | -3.979403 | -2.495109 | 1.390658  |
| 51 | 1 | -4.971394 | -1.114475 | 1.895905  |
| 52 | 6 | -5.091526 | 0.200722  | -0.547942 |
| 53 | 1 | -6.006657 | -0.297455 | -0.884835 |
| 54 | 1 | -5.354800 | 0.874346  | 0.275267  |
| 55 | 1 | -4.701227 | 0.794455  | -1.380043 |

17 (E = -1554.3531079 au)

| Center Number | Atomic Number | Coordinates (Angstroms) |          |           |
|---------------|---------------|-------------------------|----------|-----------|
|               |               | X                       | Y        | Z         |
| 1             | 77            | 0.264907                | 0.634099 | 0.151406  |
| 2             | 6             | 1.609580                | 2.138061 | -1.064439 |
| 3             | 6             | 1.332019                | 2.572272 | 0.297381  |
| 4             | 6             | -0.090798               | 2.831646 | 0.388270  |
| 5             | 6             | -0.686700               | 2.442252 | -0.852205 |
| 6             | 6             | 0.385075                | 2.042313 | -1.759715 |
| 7             | 6             | 2.979134                | 1.960468 | -1.653310 |
| 8             | 1             | 3.704566                | 1.628383 | -0.909347 |
| 9             | 1             | 3.323387                | 2.925735 | -2.049315 |
| 10            | 1             | 2.978631                | 1.247564 | -2.481437 |
| 11            | 6             | 2.375635                | 2.961065 | 1.309880  |

|    |   |           |           |           |
|----|---|-----------|-----------|-----------|
| 12 | 1 | 1.973819  | 2.947031  | 2.325764  |
| 13 | 1 | 3.233428  | 2.284309  | 1.277039  |
| 14 | 1 | 2.737476  | 3.976845  | 1.102421  |
| 15 | 6 | -0.795843 | 3.506107  | 1.530226  |
| 16 | 1 | -0.805147 | 4.590264  | 1.357500  |
| 17 | 1 | -1.832989 | 3.173487  | 1.622414  |
| 18 | 1 | -0.291351 | 3.326980  | 2.482856  |
| 19 | 6 | -2.100813 | 2.730666  | -1.274521 |
| 20 | 1 | -2.470179 | 2.010965  | -2.009779 |
| 21 | 1 | -2.788259 | 2.741337  | -0.425985 |
| 22 | 1 | -2.136064 | 3.722994  | -1.744523 |
| 23 | 6 | 0.216433  | 1.738082  | -3.221802 |
| 24 | 1 | 0.271281  | 2.671785  | -3.797804 |
| 25 | 1 | 0.999148  | 1.071049  | -3.591913 |
| 26 | 1 | -0.752901 | 1.281623  | -3.439425 |
| 27 | 6 | 1.738071  | -1.174840 | 1.981630  |
| 28 | 7 | 1.663492  | -0.815540 | 0.722896  |
| 29 | 6 | 0.814105  | -0.446593 | 2.830993  |
| 30 | 6 | 0.787195  | -0.661330 | 4.330845  |
| 31 | 1 | 0.049768  | 0.006338  | 4.786664  |
| 32 | 1 | 0.514579  | -1.691064 | 4.595726  |
| 33 | 1 | 1.761781  | -0.450782 | 4.788521  |
| 34 | 6 | 2.646776  | -2.249409 | 2.496660  |
| 35 | 1 | 2.168001  | -2.784355 | 3.320137  |
| 36 | 1 | 2.920370  | -2.965798 | 1.721610  |
| 37 | 1 | 3.567133  | -1.797304 | 2.887769  |
| 38 | 6 | -0.020562 | 0.376613  | 2.148088  |
| 39 | 1 | -0.795063 | 0.921939  | 2.683303  |
| 40 | 8 | 2.394547  | -1.582560 | -0.213598 |
| 41 | 6 | 3.737425  | -1.279488 | -0.342361 |
| 42 | 8 | 4.281785  | -0.458848 | 0.344545  |
| 43 | 6 | 4.382329  | -2.161978 | -1.418859 |
| 44 | 6 | 3.560481  | -2.111577 | -2.732952 |
| 45 | 1 | 3.492708  | -1.090233 | -3.123446 |
| 46 | 1 | 4.060545  | -2.727975 | -3.487351 |
| 47 | 1 | 2.548016  | -2.498724 | -2.590144 |
| 48 | 6 | 5.818650  | -1.654867 | -1.670679 |
| 49 | 1 | 6.295709  | -2.289252 | -2.424654 |
| 50 | 1 | 5.818212  | -0.623978 | -2.039573 |
| 51 | 1 | 6.420347  | -1.691364 | -0.757690 |
| 52 | 6 | 4.424890  | -3.622957 | -0.885655 |
| 53 | 1 | 4.922024  | -4.255934 | -1.628193 |
| 54 | 1 | 4.991491  | -3.690081 | 0.049840  |
| 55 | 1 | 3.418140  | -4.018103 | -0.719494 |
| 56 | 6 | -0.692241 | -0.900330 | -1.131694 |
| 57 | 1 | -1.139138 | -0.374046 | -1.966390 |
| 58 | 1 | 0.046647  | -1.646454 | -1.401401 |
| 59 | 6 | -1.436573 | -1.064573 | 0.047248  |
| 60 | 6 | -1.193522 | -2.286342 | 0.913034  |
| 61 | 1 | -0.169551 | -2.653173 | 0.837910  |
| 62 | 1 | -1.432573 | -2.102949 | 1.964093  |
| 63 | 1 | -1.849330 | -3.092749 | 0.558488  |
| 64 | 6 | -2.816529 | -0.437843 | 0.204138  |
| 65 | 1 | -2.964551 | -0.124408 | 1.243996  |
| 66 | 1 | -2.896798 | 0.454382  | -0.415774 |
| 67 | 6 | -3.944213 | -1.414828 | -0.194093 |
| 68 | 1 | -3.983879 | -2.281975 | 0.475096  |
| 69 | 1 | -3.774647 | -1.812559 | -1.203698 |
| 70 | 6 | -5.311904 | -0.760893 | -0.174548 |
| 71 | 8 | -5.540317 | 0.408142  | 0.109819  |
| 72 | 8 | -6.278538 | -1.645442 | -0.518182 |
| 73 | 6 | -7.670931 | -1.147246 | -0.544799 |
| 74 | 1 | -7.720426 | -0.316743 | -1.254365 |

|    |   |           |           |           |
|----|---|-----------|-----------|-----------|
| 75 | 1 | -7.915526 | -0.771481 | 0.452522  |
| 76 | 6 | -8.554424 | -2.310903 | -0.955712 |
| 77 | 1 | -9.598792 | -1.982872 | -0.987953 |
| 78 | 1 | -8.281521 | -2.681222 | -1.948872 |
| 79 | 1 | -8.477106 | -3.135915 | -0.240633 |

**TS17-18** (E = -1554.3101312 au)

| Center Number | Atomic Number | Coordinates (Angstroms) |           |           |
|---------------|---------------|-------------------------|-----------|-----------|
|               |               | X                       | Y         | Z         |
| 1             | 77            | 0.204551                | 0.408929  | 0.539627  |
| 2             | 6             | 1.317603                | 2.213608  | -0.085813 |
| 3             | 6             | 1.465876                | 2.162497  | 1.375013  |
| 4             | 6             | 0.179726                | 2.265959  | 1.940889  |
| 5             | 6             | -0.796293               | 2.368770  | 0.857923  |
| 6             | 6             | -0.071224               | 2.412993  | -0.386445 |
| 7             | 6             | 2.454142                | 2.328994  | -1.062888 |
| 8             | 1             | 3.330141                | 1.768672  | -0.730549 |
| 9             | 1             | 2.746886                | 3.384300  | -1.156399 |
| 10            | 1             | 2.171562                | 1.972438  | -2.056765 |
| 11            | 6             | 2.779812                | 2.103190  | 2.102709  |
| 12            | 1             | 2.654965                | 1.757199  | 3.132159  |
| 13            | 1             | 3.483790                | 1.434217  | 1.601831  |
| 14            | 1             | 3.231461                | 3.104133  | 2.137647  |
| 15            | 6             | -0.162168               | 2.306912  | 3.403616  |
| 16            | 1             | -0.301091               | 3.348758  | 3.721581  |
| 17            | 1             | -1.092661               | 1.773618  | 3.618672  |
| 18            | 1             | 0.630009                | 1.871712  | 4.017600  |
| 19            | 6             | -2.251583               | 2.702578  | 1.041573  |
| 20            | 1             | -2.850157               | 2.408247  | 0.175622  |
| 21            | 1             | -2.671085               | 2.220516  | 1.928812  |
| 22            | 1             | -2.366866               | 3.787461  | 1.170995  |
| 23            | 6             | -0.653845               | 2.702996  | -1.741693 |
| 24            | 1             | -0.669396               | 3.788250  | -1.909268 |
| 25            | 1             | -0.063085               | 2.248008  | -2.540798 |
| 26            | 1             | -1.681502               | 2.340625  | -1.829058 |
| 27            | 6             | 1.408229                | -2.135700 | 1.531782  |
| 28            | 7             | 1.488076                | -1.264036 | 0.555216  |
| 29            | 6             | 0.383664                | -1.783747 | 2.495389  |
| 30            | 6             | 0.456611                | -2.290004 | 3.912961  |
| 31            | 1             | -0.362407               | -1.879224 | 4.508672  |
| 32            | 1             | 0.383491                | -3.385641 | 3.946246  |
| 33            | 1             | 1.405689                | -2.016321 | 4.390751  |
| 34            | 6             | 2.253961                | -3.366678 | 1.663387  |
| 35            | 1             | 1.631425                | -4.234067 | 1.904686  |
| 36            | 1             | 2.820699                | -3.580576 | 0.759081  |
| 37            | 1             | 2.958280                | -3.231727 | 2.494200  |
| 38            | 6             | -0.612766               | -0.962017 | 2.012526  |
| 39            | 1             | -1.348672               | -0.615316 | 2.728948  |
| 40            | 8             | 2.221871                | -1.702370 | -0.580434 |
| 41            | 6             | 3.509930                | -1.220496 | -0.683548 |
| 42            | 8             | 4.024688                | -0.568723 | 0.184443  |
| 43            | 6             | 4.146121                | -1.677124 | -2.002394 |
| 44            | 6             | 3.246846                | -1.271014 | -3.199672 |
| 45            | 1             | 3.105262                | -0.185529 | -3.241893 |
| 46            | 1             | 3.731765                | -1.584945 | -4.130000 |
| 47            | 1             | 2.265194                | -1.749712 | -3.145319 |
| 48            | 6             | 5.534778                | -1.015672 | -2.131993 |
| 49            | 1             | 6.002677                | -1.344703 | -3.065416 |
| 50            | 1             | 5.456180                | 0.076071  | -2.153348 |
| 51            | 1             | 6.189121                | -1.295344 | -1.300779 |

|    |   |           |           |           |
|----|---|-----------|-----------|-----------|
| 52 | 6 | 4.300383  | -3.224080 | -1.963427 |
| 53 | 1 | 4.794913  | -3.553866 | -2.883058 |
| 54 | 1 | 4.917171  | -3.541780 | -1.115080 |
| 55 | 1 | 3.328583  | -3.722723 | -1.900973 |
| 56 | 6 | -1.033305 | -0.729350 | -0.716821 |
| 57 | 1 | -1.747576 | -0.087156 | -1.226102 |
| 58 | 1 | -0.510314 | -1.376419 | -1.418123 |
| 59 | 6 | -1.560707 | -1.432472 | 0.493679  |
| 60 | 6 | -1.408244 | -2.958759 | 0.414158  |
| 61 | 1 | -0.393077 | -3.258514 | 0.149816  |
| 62 | 1 | -1.696346 | -3.443120 | 1.352237  |
| 63 | 1 | -2.062322 | -3.320160 | -0.388962 |
| 64 | 6 | -2.979490 | -1.003072 | 0.925448  |
| 65 | 1 | -3.218497 | -1.451546 | 1.896193  |
| 66 | 1 | -3.005365 | 0.081248  | 1.055861  |
| 67 | 6 | -4.065159 | -1.411940 | -0.086992 |
| 68 | 1 | -4.162629 | -2.501446 | -0.157141 |
| 69 | 1 | -3.822784 | -1.060302 | -1.097577 |
| 70 | 6 | -5.427619 | -0.855860 | 0.281404  |
| 71 | 8 | -5.669538 | -0.142603 | 1.246941  |
| 72 | 8 | -6.369940 | -1.249525 | -0.607439 |
| 73 | 6 | -7.752547 | -0.776029 | -0.377431 |
| 74 | 1 | -7.739081 | 0.317323  | -0.367445 |
| 75 | 1 | -8.072904 | -1.131718 | 0.605695  |
| 76 | 6 | -8.608536 | -1.332678 | -1.500245 |
| 77 | 1 | -9.644612 | -1.004030 | -1.366616 |
| 78 | 1 | -8.259989 | -0.976786 | -2.474840 |
| 79 | 1 | -8.594470 | -2.427079 | -1.501158 |

**18** (E = -1554.3393378 au)

| Center Number | Atomic Number | Coordinates (Angstroms) |           |           |
|---------------|---------------|-------------------------|-----------|-----------|
|               |               | X                       | Y         | Z         |
| 1             | 77            | 0.213802                | 0.440480  | 0.875441  |
| 2             | 6             | 0.715087                | 2.299551  | -0.201178 |
| 3             | 6             | 1.684681                | 2.254119  | 0.893646  |
| 4             | 6             | 0.986999                | 2.300935  | 2.121053  |
| 5             | 6             | -0.436696               | 2.357165  | 1.816406  |
| 6             | 6             | -0.593417               | 2.448614  | 0.390066  |
| 7             | 6             | 1.051788                | 2.469281  | -1.659106 |
| 8             | 1             | 1.946847                | 1.904224  | -1.932825 |
| 9             | 1             | 1.240638                | 3.527500  | -1.885184 |
| 10            | 1             | 0.232865                | 2.130786  | -2.299587 |
| 11            | 6             | 3.176596                | 2.256138  | 0.718613  |
| 12            | 1             | 3.688614                | 1.794340  | 1.565738  |
| 13            | 1             | 3.479944                | 1.730700  | -0.189390 |
| 14            | 1             | 3.529528                | 3.293070  | 0.633988  |
| 15            | 6             | 1.589024                | 2.381323  | 3.496143  |
| 16            | 1             | 1.690120                | 3.432712  | 3.797930  |
| 17            | 1             | 0.964249                | 1.886735  | 4.244646  |
| 18            | 1             | 2.583827                | 1.929089  | 3.530517  |
| 19            | 6             | -1.527617               | 2.555404  | 2.833877  |
| 20            | 1             | -2.500476               | 2.234219  | 2.454112  |
| 21            | 1             | -1.325717               | 2.009243  | 3.759211  |
| 22            | 1             | -1.601518               | 3.621144  | 3.088475  |
| 23            | 6             | -1.866702               | 2.761642  | -0.344283 |
| 24            | 1             | -1.978496               | 3.850842  | -0.428179 |
| 25            | 1             | -1.863789               | 2.350741  | -1.357167 |
| 26            | 1             | -2.745630               | 2.375652  | 0.178209  |
| 27            | 6             | 1.199316                | -2.054117 | 1.514319  |
| 28            | 7             | 1.431656                | -1.267864 | 0.529016  |

|    |   |           |           |           |
|----|---|-----------|-----------|-----------|
| 29 | 6 | 0.209408  | -1.311860 | 2.362885  |
| 30 | 6 | 0.585114  | -1.126841 | 3.819882  |
| 31 | 1 | -0.107868 | -0.441858 | 4.314593  |
| 32 | 1 | 0.528396  | -2.092532 | 4.340242  |
| 33 | 1 | 1.603571  | -0.743797 | 3.933941  |
| 34 | 6 | 1.801677  | -3.383797 | 1.816258  |
| 35 | 1 | 1.048663  | -4.052870 | 2.241929  |
| 36 | 1 | 2.234441  | -3.840962 | 0.924575  |
| 37 | 1 | 2.596292  | -3.261401 | 2.563670  |
| 38 | 6 | -1.098287 | -1.072629 | 1.896345  |
| 39 | 1 | -1.751125 | -0.630046 | 2.643790  |
| 40 | 8 | 2.214756  | -1.702547 | -0.554119 |
| 41 | 6 | 3.587346  | -1.524921 | -0.409236 |
| 42 | 8 | 4.071309  | -1.130957 | 0.613918  |
| 43 | 6 | 4.308321  | -1.914972 | -1.702395 |
| 44 | 6 | 3.815040  | -1.002755 | -2.858808 |
| 45 | 1 | 4.010648  | 0.053828  | -2.644222 |
| 46 | 1 | 4.356111  | -1.267660 | -3.773153 |
| 47 | 1 | 2.744866  | -1.131893 | -3.043191 |
| 48 | 6 | 5.825876  | -1.728962 | -1.490580 |
| 49 | 1 | 6.352060  | -2.010013 | -2.408426 |
| 50 | 1 | 6.071749  | -0.688167 | -1.257799 |
| 51 | 1 | 6.195188  | -2.358978 | -0.675275 |
| 52 | 6 | 3.996454  | -3.400532 | -2.033904 |
| 53 | 1 | 4.541563  | -3.681321 | -2.940989 |
| 54 | 1 | 4.320194  | -4.065130 | -1.225035 |
| 55 | 1 | 2.929109  | -3.557594 | -2.213032 |
| 56 | 6 | -1.104678 | -0.640736 | -0.414532 |
| 57 | 1 | -1.792450 | 0.048128  | -0.901977 |
| 58 | 1 | -0.535632 | -1.176895 | -1.175422 |
| 59 | 6 | -1.797526 | -1.564567 | 0.611303  |
| 60 | 6 | -1.609293 | -3.071022 | 0.340448  |
| 61 | 1 | -0.555176 | -3.342865 | 0.239821  |
| 62 | 1 | -2.045921 | -3.671410 | 1.148509  |
| 63 | 1 | -2.097753 | -3.349990 | -0.599578 |
| 64 | 6 | -3.306524 | -1.229806 | 0.767507  |
| 65 | 1 | -3.695578 | -1.765039 | 1.645425  |
| 66 | 1 | -3.403963 | -0.158574 | 0.982709  |
| 67 | 6 | -4.163824 | -1.570519 | -0.458779 |
| 68 | 1 | -4.263519 | -2.651890 | -0.598492 |
| 69 | 1 | -3.697881 | -1.186179 | -1.377789 |
| 70 | 6 | -5.559616 | -0.983084 | -0.387358 |
| 71 | 8 | -5.935116 | -0.122148 | 0.399176  |
| 72 | 8 | -6.366272 | -1.523122 | -1.333523 |
| 73 | 6 | -7.752690 | -1.015435 | -1.407497 |
| 74 | 1 | -7.710907 | 0.062834  | -1.584900 |
| 75 | 1 | -8.230902 | -1.192700 | -0.440219 |
| 76 | 6 | -8.441941 | -1.759836 | -2.536578 |
| 77 | 1 | -9.476868 | -1.412835 | -2.625192 |
| 78 | 1 | -7.938287 | -1.580806 | -3.491734 |
| 79 | 1 | -8.457793 | -2.837480 | -2.345613 |

19 (E = -1554.4416438 au)

| Center Number | Atomic Number | Coordinates (Angstroms) |           |           |
|---------------|---------------|-------------------------|-----------|-----------|
|               |               | X                       | Y         | Z         |
| 1             | 77            | 1.526273                | -0.519855 | -0.014325 |
| 2             | 6             | 2.095469                | -2.464040 | 0.848521  |
| 3             | 6             | 1.098150                | -2.644419 | -0.204801 |
| 4             | 6             | 1.680392                | -2.185277 | -1.440788 |
| 5             | 6             | 2.989560                | -1.659942 | -1.153976 |

|    |   |           |           |           |
|----|---|-----------|-----------|-----------|
| 6  | 6 | 3.248991  | -1.860769 | 0.271093  |
| 7  | 6 | 1.919623  | -2.885404 | 2.278189  |
| 8  | 1 | 0.892836  | -2.728823 | 2.619437  |
| 9  | 1 | 2.144185  | -3.955949 | 2.372614  |
| 10 | 1 | 2.589299  | -2.339437 | 2.946364  |
| 11 | 6 | -0.210976 | -3.363343 | -0.042527 |
| 12 | 1 | -0.914693 | -3.106246 | -0.837685 |
| 13 | 1 | -0.680426 | -3.131180 | 0.917093  |
| 14 | 1 | -0.043060 | -4.447961 | -0.080477 |
| 15 | 6 | 1.050318  | -2.283806 | -2.800076 |
| 16 | 1 | 1.324991  | -3.245331 | -3.253050 |
| 17 | 1 | 1.394263  | -1.490323 | -3.467397 |
| 18 | 1 | -0.040169 | -2.240819 | -2.747806 |
| 19 | 6 | 4.000459  | -1.177570 | -2.154338 |
| 20 | 1 | 4.616119  | -0.369917 | -1.749255 |
| 21 | 1 | 3.525980  | -0.819862 | -3.070608 |
| 22 | 1 | 4.670044  | -2.005502 | -2.422960 |
| 23 | 6 | 4.538324  | -1.528575 | 0.964978  |
| 24 | 1 | 4.972517  | -0.601346 | 0.581552  |
| 25 | 1 | 5.264215  | -2.334271 | 0.794227  |
| 26 | 1 | 4.400838  | -1.420708 | 2.043183  |
| 27 | 6 | 0.411950  | 1.532374  | -2.053414 |
| 28 | 7 | 0.142153  | 0.692051  | -1.103777 |
| 29 | 6 | -0.661816 | 2.184665  | -2.840453 |
| 30 | 6 | -1.910677 | 2.180745  | -2.350654 |
| 31 | 1 | -2.695724 | 2.719753  | -2.875209 |
| 32 | 6 | -1.278113 | 0.359611  | -0.833567 |
| 33 | 1 | -1.329902 | -0.004771 | 0.190286  |
| 34 | 1 | -1.538913 | -0.471479 | -1.500494 |
| 35 | 6 | -2.269167 | 1.515144  | -1.046712 |
| 36 | 8 | 2.345986  | 1.378192  | 0.794616  |
| 37 | 6 | 1.486958  | 1.423645  | 1.733252  |
| 38 | 8 | 0.628078  | 0.486470  | 1.764279  |
| 39 | 6 | 1.536331  | 2.522761  | 2.790659  |
| 40 | 6 | 0.234631  | 2.544505  | 3.619715  |
| 41 | 1 | 0.064527  | 1.586420  | 4.119982  |
| 42 | 1 | -0.635564 | 2.761907  | 2.991814  |
| 43 | 1 | 0.306160  | 3.324684  | 4.385264  |
| 44 | 6 | 2.744828  | 2.199733  | 3.717163  |
| 45 | 1 | 2.819290  | 2.969452  | 4.493040  |
| 46 | 1 | 3.682234  | 2.186860  | 3.152138  |
| 47 | 1 | 2.618143  | 1.229296  | 4.210440  |
| 48 | 6 | 1.762747  | 3.892126  | 2.103358  |
| 49 | 1 | 2.683718  | 3.890108  | 1.513396  |
| 50 | 1 | 1.841699  | 4.672936  | 2.867501  |
| 51 | 1 | 0.927673  | 4.148788  | 1.441701  |
| 52 | 6 | 1.834720  | 1.882327  | -2.392783 |
| 53 | 1 | 2.070423  | 1.555977  | -3.412852 |
| 54 | 1 | 2.536156  | 1.423629  | -1.699289 |
| 55 | 1 | 1.971100  | 2.969350  | -2.365038 |
| 56 | 6 | -0.306847 | 2.888232  | -4.134559 |
| 57 | 1 | 0.391953  | 3.717318  | -3.973605 |
| 58 | 1 | -1.211231 | 3.295356  | -4.595669 |
| 59 | 1 | 0.159372  | 2.202437  | -4.852140 |
| 60 | 6 | -3.715518 | 0.950406  | -1.166193 |
| 61 | 1 | -3.764342 | 0.295870  | -2.045976 |
| 62 | 1 | -4.387407 | 1.794159  | -1.369329 |
| 63 | 6 | -2.178354 | 2.574274  | 0.083407  |
| 64 | 1 | -1.176464 | 3.012345  | 0.128164  |
| 65 | 1 | -2.895514 | 3.383270  | -0.097930 |
| 66 | 1 | -2.398599 | 2.129732  | 1.059781  |
| 67 | 6 | -4.228301 | 0.184181  | 0.061714  |
| 68 | 1 | -4.194186 | 0.802669  | 0.966386  |

|    |   |           |           |           |
|----|---|-----------|-----------|-----------|
| 69 | 1 | -3.612153 | -0.698980 | 0.273995  |
| 70 | 6 | -5.657564 | -0.294514 | -0.107049 |
| 71 | 8 | -6.346960 | -0.145889 | -1.108191 |
| 72 | 8 | -6.095758 | -0.924916 | 1.009476  |
| 73 | 6 | -7.478734 | -1.447895 | 0.989709  |
| 74 | 1 | -7.558459 | -2.165431 | 0.168338  |
| 75 | 1 | -8.154837 | -0.611732 | 0.791202  |
| 76 | 6 | -7.734314 | -2.087883 | 2.342034  |
| 77 | 1 | -8.752809 | -2.489415 | 2.369540  |
| 78 | 1 | -7.037062 | -2.911183 | 2.526594  |
| 79 | 1 | -7.633512 | -1.355749 | 3.149394  |

**20** (E = -841.1469366 au)

| Center Number | Atomic Number | Coordinates (Angstroms) |           |           |
|---------------|---------------|-------------------------|-----------|-----------|
|               |               | X                       | Y         | Z         |
| 1             | 77            | 0.220916                | -0.520693 | 0.004024  |
| 2             | 6             | 1.919692                | 0.117344  | 1.200901  |
| 3             | 6             | 2.175410                | -1.193455 | 0.689923  |
| 4             | 6             | 2.164082                | -1.127755 | -0.768784 |
| 5             | 6             | 1.900681                | 0.224123  | -1.153416 |
| 6             | 6             | 1.712389                | 1.002728  | 0.063879  |
| 7             | 6             | 1.892345                | 0.527379  | 2.642531  |
| 8             | 1             | 1.618501                | -0.305997 | 3.293182  |
| 9             | 1             | 2.890795                | 0.875438  | 2.938031  |
| 10            | 1             | 1.187264                | 1.343884  | 2.815452  |
| 11            | 6             | 2.457237                | -2.425036 | 1.495534  |
| 12            | 1             | 2.066808                | -3.322442 | 1.008733  |
| 13            | 1             | 2.026802                | -2.359942 | 2.497121  |
| 14            | 1             | 3.543654                | -2.547015 | 1.600412  |
| 15            | 6             | 2.433672                | -2.281322 | -1.686431 |
| 16            | 1             | 3.518525                | -2.406600 | -1.801956 |
| 17            | 1             | 2.004805                | -2.117832 | -2.677303 |
| 18            | 1             | 2.030835                | -3.215114 | -1.285747 |
| 19            | 6             | 1.851820                | 0.765309  | -2.550491 |
| 20            | 1             | 1.148612                | 1.597110  | -2.635974 |
| 21            | 1             | 1.563907                | -0.003141 | -3.271202 |
| 22            | 1             | 2.847373                | 1.135731  | -2.828190 |
| 23            | 6             | 1.476411                | 2.478382  | 0.133360  |
| 24            | 1             | 0.907177                | 2.836104  | -0.727521 |
| 25            | 1             | 2.445949                | 2.995410  | 0.136920  |
| 26            | 1             | 0.941787                | 2.758083  | 1.043820  |
| 27            | 8             | -1.675587               | -0.375557 | -1.074053 |
| 28            | 6             | -2.348679               | -0.367744 | 0.014778  |
| 29            | 8             | -1.673820               | -0.413552 | 1.097777  |
| 30            | 6             | -3.864877               | -0.285767 | 0.000052  |
| 31            | 6             | -4.431571               | -0.400300 | 1.430571  |
| 32            | 1             | -4.056592               | 0.400800  | 2.074939  |
| 33            | 1             | -4.169133               | -1.359485 | 1.888373  |
| 34            | 1             | -5.523333               | -0.326981 | 1.391881  |
| 35            | 6             | -4.250240               | 1.087102  | -0.622587 |
| 36            | 1             | -5.341696               | 1.167318  | -0.659453 |
| 37            | 1             | -3.861028               | 1.181089  | -1.640672 |
| 38            | 1             | -3.866961               | 1.918391  | -0.020345 |
| 39            | 6             | -4.410314               | -1.433283 | -0.892255 |
| 40            | 1             | -4.017924               | -1.362064 | -1.910661 |
| 41            | 1             | -5.502312               | -1.364675 | -0.935054 |
| 42            | 1             | -4.146270               | -2.414487 | -0.481905 |

**1-NH<sub>2</sub>** (E = -739.2849561 au)

| Center Number | Atomic Number | Coordinates (Angstroms) |           |           |
|---------------|---------------|-------------------------|-----------|-----------|
|               |               | X                       | Y         | Z         |
| 1             | 77            | 0.113560                | -1.042191 | -0.434517 |
| 2             | 6             | 0.571386                | 1.003752  | 0.384190  |
| 3             | 6             | 1.513653                | 0.586875  | -0.646468 |
| 4             | 6             | 2.236320                | -0.561993 | -0.161444 |
| 5             | 6             | 1.634584                | -0.966331 | 1.080264  |
| 6             | 6             | 0.541238                | -0.047792 | 1.385461  |
| 7             | 7             | -0.151818               | 2.131294  | 0.392251  |
| 8             | 1             | -0.980749               | 2.173720  | 0.974563  |
| 9             | 1             | -0.198008               | 2.695485  | -0.448056 |
| 10            | 6             | 1.791714                | 1.359337  | -1.900846 |
| 11            | 1             | 2.246064                | 0.726065  | -2.665759 |
| 12            | 1             | 0.878561                | 1.791940  | -2.320602 |
| 13            | 1             | 2.488868                | 2.179033  | -1.681452 |
| 14            | 6             | 3.411535                | -1.212162 | -0.831463 |
| 15            | 1             | 4.341876                | -0.757047 | -0.467306 |
| 16            | 1             | 3.455166                | -2.282582 | -0.615476 |
| 17            | 1             | 3.378123                | -1.084181 | -1.916225 |
| 18            | 6             | 2.073264                | -2.105469 | 1.948186  |
| 19            | 1             | 1.237472                | -2.524749 | 2.513500  |
| 20            | 1             | 2.528837                | -2.905952 | 1.360531  |
| 21            | 1             | 2.820837                | -1.746080 | 2.668063  |
| 22            | 6             | -0.294674               | -0.025181 | 2.629511  |
| 23            | 1             | -0.365671               | -1.018741 | 3.077625  |
| 24            | 1             | 0.161086                | 0.649577  | 3.366458  |
| 25            | 1             | -1.308967               | 0.320549  | 2.414140  |
| 26            | 8             | -1.825631               | -1.551849 | -0.706122 |
| 27            | 6             | -2.894682               | -0.907043 | -0.258661 |
| 28            | 8             | -2.847635               | 0.116920  | 0.404680  |
| 29            | 6             | -4.193682               | -1.571573 | -0.668816 |
| 30            | 1             | -4.216498               | -2.604957 | -0.306500 |
| 31            | 1             | -5.047505               | -1.022706 | -0.268802 |
| 32            | 1             | -4.261641               | -1.608372 | -1.761787 |

**21** (E = -1106.6613836 au)

| Center Number | Atomic Number | Coordinates (Angstroms) |           |           |
|---------------|---------------|-------------------------|-----------|-----------|
|               |               | X                       | Y         | Z         |
| 1             | 77            | -0.882538               | 0.175975  | -0.154405 |
| 2             | 6             | -1.794354               | -1.969192 | -0.788570 |
| 3             | 6             | -2.748247               | -0.905203 | -0.496934 |
| 4             | 6             | -2.572458               | -0.557941 | 0.888152  |
| 5             | 6             | -1.399316               | -1.298099 | 1.381421  |
| 6             | 6             | -0.913407               | -2.138195 | 0.332901  |
| 7             | 7             | -1.705259               | -2.615444 | -1.952903 |
| 8             | 1             | -0.946700               | -3.257670 | -2.143013 |
| 9             | 1             | -2.325004               | -2.401185 | -2.723250 |
| 10            | 6             | -3.885187               | -0.511815 | -1.402369 |
| 11            | 1             | -4.318164               | 0.443366  | -1.095650 |
| 12            | 1             | -3.553148               | -0.400458 | -2.440200 |
| 13            | 1             | -4.682245               | -1.266564 | -1.376483 |
| 14            | 6             | -3.517583               | 0.246884  | 1.732148  |
| 15            | 1             | -4.267027               | -0.417598 | 2.182754  |
| 16            | 1             | -2.992402               | 0.762319  | 2.540359  |
| 17            | 1             | -4.046233               | 0.996022  | 1.137347  |
| 18            | 6             | -0.914575               | -1.291644 | 2.800306  |
| 19            | 1             | 0.149254                | -1.533137 | 2.863471  |
| 20            | 1             | -1.075368               | -0.319326 | 3.272373  |

|    |   |           |           |           |
|----|---|-----------|-----------|-----------|
| 21 | 1 | -1.467532 | -2.043537 | 3.380030  |
| 22 | 6 | 0.188895  | -3.159640 | 0.407213  |
| 23 | 1 | -0.227397 | -4.169327 | 0.523859  |
| 24 | 1 | 0.812839  | -3.154041 | -0.493191 |
| 25 | 1 | 0.842776  | -2.971581 | 1.261738  |
| 26 | 6 | 0.972443  | 2.464388  | 0.067174  |
| 27 | 7 | 0.954611  | 1.163000  | 0.165680  |
| 28 | 6 | -0.347008 | 3.052270  | -0.217212 |
| 29 | 6 | -0.502043 | 4.555694  | -0.311707 |
| 30 | 1 | -1.547095 | 4.804637  | -0.518713 |
| 31 | 1 | -0.213646 | 5.058802  | 0.620299  |
| 32 | 1 | 0.110868  | 4.982674  | -1.115962 |
| 33 | 6 | 2.195338  | 3.308585  | 0.240450  |
| 34 | 1 | 2.044821  | 3.998095  | 1.080220  |
| 35 | 1 | 3.090261  | 2.718700  | 0.425041  |
| 36 | 1 | 2.345735  | 3.925970  | -0.652678 |
| 37 | 6 | -1.344046 | 2.144261  | -0.361505 |
| 38 | 1 | -2.350574 | 2.506813  | -0.567807 |
| 39 | 8 | 2.188237  | 0.556737  | 0.506768  |
| 40 | 6 | 2.708530  | -0.257326 | -0.471951 |
| 41 | 8 | 2.180690  | -0.390987 | -1.545079 |
| 42 | 6 | 4.028328  | -0.888928 | -0.011005 |
| 43 | 6 | 3.901362  | -1.470622 | 1.419628  |
| 44 | 1 | 3.136770  | -2.253367 | 1.464812  |
| 45 | 1 | 4.858720  | -1.917881 | 1.707202  |
| 46 | 1 | 3.651823  | -0.696511 | 2.150237  |
| 47 | 6 | 4.414010  | -2.004881 | -1.005739 |
| 48 | 1 | 5.365784  | -2.448453 | -0.696056 |
| 49 | 1 | 3.657918  | -2.796776 | -1.027876 |
| 50 | 1 | 4.529356  | -1.612785 | -2.020466 |
| 51 | 6 | 5.112916  | 0.227153  | -0.027093 |
| 52 | 1 | 6.080197  | -0.214410 | 0.234821  |
| 53 | 1 | 5.202887  | 0.681076  | -1.020243 |
| 54 | 1 | 4.889450  | 1.012704  | 0.701377  |

22 (E = -1570.4093811 au)

| Center Number | Atomic Number | Coordinates (Angstroms) |          |           |
|---------------|---------------|-------------------------|----------|-----------|
|               |               | X                       | Y        | Z         |
| 1             | 77            | 0.097068                | 0.236318 | 0.711541  |
| 2             | 6             | 1.642254                | 2.103022 | 0.359399  |
| 3             | 6             | 1.191391                | 1.879629 | 1.722876  |
| 4             | 6             | -0.240562               | 2.148500 | 1.750860  |
| 5             | 6             | -0.667793               | 2.330154 | 0.396161  |
| 6             | 6             | 0.499319                | 2.246061 | -0.473430 |
| 7             | 7             | 2.939784                | 2.180335 | -0.028293 |
| 8             | 1             | 3.141082                | 2.103252 | -1.018068 |
| 9             | 1             | 3.632246                | 1.719973 | 0.550751  |
| 10            | 6             | 2.115201                | 1.787279 | 2.908126  |
| 11            | 1             | 1.586527                | 1.436081 | 3.796928  |
| 12            | 1             | 2.941556                | 1.093556 | 2.722751  |
| 13            | 1             | 2.542291                | 2.773700 | 3.133106  |
| 14            | 6             | -1.068430               | 2.363689 | 2.986748  |
| 15            | 1             | -1.025650               | 3.420755 | 3.280104  |
| 16            | 1             | -2.116043               | 2.099824 | 2.821709  |
| 17            | 1             | -0.698570               | 1.771814 | 3.828196  |
| 18            | 6             | -2.011773               | 2.837945 | -0.047521 |
| 19            | 1             | -2.351654               | 2.371907 | -0.976760 |
| 20            | 1             | -2.777909               | 2.686474 | 0.715289  |
| 21            | 1             | -1.935807               | 3.917523 | -0.234687 |
| 22            | 6             | 0.530188                | 2.543675 | -1.948080 |

|    |   |           |           |           |
|----|---|-----------|-----------|-----------|
| 23 | 1 | 0.719498  | 3.612230  | -2.119791 |
| 24 | 1 | 1.312843  | 1.977572  | -2.463995 |
| 25 | 1 | -0.420381 | 2.298236  | -2.428584 |
| 26 | 6 | 1.590161  | -2.206173 | 1.523893  |
| 27 | 7 | 1.460849  | -1.362647 | 0.530370  |
| 28 | 6 | 0.730235  | -1.888093 | 2.651020  |
| 29 | 6 | 0.764597  | -2.717060 | 3.919605  |
| 30 | 1 | 0.077975  | -2.290859 | 4.657548  |
| 31 | 1 | 0.461338  | -3.757098 | 3.742725  |
| 32 | 1 | 1.767158  | -2.738466 | 4.364943  |
| 33 | 6 | 2.503884  | -3.394547 | 1.509549  |
| 34 | 1 | 2.023461  | -4.243696 | 2.002768  |
| 35 | 1 | 2.788546  | -3.688183 | 0.499545  |
| 36 | 1 | 3.416375  | -3.162957 | 2.074059  |
| 37 | 6 | -0.098870 | -0.836707 | 2.431537  |
| 38 | 1 | -0.818157 | -0.556794 | 3.199232  |
| 39 | 8 | 2.152386  | -1.671038 | -0.667527 |
| 40 | 6 | 3.459161  | -1.238683 | -0.741352 |
| 41 | 8 | 4.013542  | -0.691437 | 0.174661  |
| 42 | 6 | 4.065917  | -1.599655 | -2.103267 |
| 43 | 6 | 3.141838  | -1.122351 | -3.253518 |
| 44 | 1 | 2.990735  | -0.037564 | -3.219143 |
| 45 | 1 | 3.612130  | -1.366654 | -4.211815 |
| 46 | 1 | 2.165365  | -1.612609 | -3.215545 |
| 47 | 6 | 5.448886  | -0.923685 | -2.219454 |
| 48 | 1 | 5.897538  | -1.189029 | -3.182096 |
| 49 | 1 | 5.363795  | 0.166843  | -2.168965 |
| 50 | 1 | 6.122467  | -1.251844 | -1.422232 |
| 51 | 6 | 4.228051  | -3.145301 | -2.168110 |
| 52 | 1 | 4.705692  | -3.411593 | -3.116872 |
| 53 | 1 | 4.862772  | -3.514070 | -1.354546 |
| 54 | 1 | 3.259703  | -3.652605 | -2.119937 |
| 55 | 6 | -0.990930 | -0.566296 | -1.033412 |
| 56 | 1 | -1.416769 | 0.279546  | -1.560137 |
| 57 | 1 | -0.321467 | -1.181451 | -1.624594 |
| 58 | 6 | -1.710358 | -1.150912 | 0.023995  |
| 59 | 6 | -1.533813 | -2.633373 | 0.302047  |
| 60 | 1 | -0.527745 | -2.982042 | 0.065392  |
| 61 | 1 | -1.763288 | -2.887959 | 1.340445  |
| 62 | 1 | -2.228832 | -3.191300 | -0.339987 |
| 63 | 6 | -3.035692 | -0.568440 | 0.500857  |
| 64 | 1 | -3.116460 | -0.683521 | 1.588426  |
| 65 | 1 | -3.078124 | 0.498915  | 0.286341  |
| 66 | 6 | -4.247358 | -1.254192 | -0.167755 |
| 67 | 1 | -4.319957 | -2.311541 | 0.106203  |
| 68 | 1 | -4.147703 | -1.224055 | -1.262320 |
| 69 | 6 | -5.561792 | -0.588977 | 0.190396  |
| 70 | 8 | -5.685229 | 0.498776  | 0.739648  |
| 71 | 8 | -6.614143 | -1.352799 | -0.189952 |
| 72 | 6 | -7.967446 | -0.815513 | 0.068714  |
| 73 | 1 | -8.063067 | 0.134082  | -0.465191 |
| 74 | 1 | -8.057108 | -0.625204 | 1.141663  |
| 75 | 6 | -8.961094 | -1.854393 | -0.418234 |
| 76 | 1 | -9.980723 | -1.494176 | -0.245259 |
| 77 | 1 | -8.841912 | -2.042055 | -1.489936 |
| 78 | 1 | -8.836794 | -2.799900 | 0.118972  |

**TS22-23** (E = -1570.3646453 au)

| Center Number | Atomic Number | Coordinates (Angstroms) |   |   |
|---------------|---------------|-------------------------|---|---|
|               |               | X                       | Y | Z |

|    |    |           |           |           |
|----|----|-----------|-----------|-----------|
| 1  | 77 | 0.221336  | 0.347021  | 0.553782  |
| 2  | 6  | 1.579996  | 2.190588  | 0.154770  |
| 3  | 6  | 1.349575  | 2.076227  | 1.586473  |
| 4  | 6  | -0.051556 | 2.218707  | 1.792567  |
| 5  | 6  | -0.711675 | 2.335620  | 0.501827  |
| 6  | 6  | 0.317013  | 2.311220  | -0.517842 |
| 7  | 7  | 2.809176  | 2.291372  | -0.430222 |
| 8  | 1  | 2.838311  | 2.172510  | -1.436598 |
| 9  | 1  | 3.568924  | 1.799021  | 0.028350  |
| 10 | 6  | 2.434164  | 2.017892  | 2.627562  |
| 11 | 1  | 2.039971  | 1.689501  | 3.592565  |
| 12 | 1  | 3.233094  | 1.326043  | 2.342557  |
| 13 | 1  | 2.883539  | 3.010365  | 2.769301  |
| 14 | 6  | -0.738496 | 2.302307  | 3.126351  |
| 15 | 1  | -0.799322 | 3.351726  | 3.443290  |
| 16 | 1  | -1.758309 | 1.911117  | 3.082636  |
| 17 | 1  | -0.193778 | 1.750761  | 3.896962  |
| 18 | 6  | -2.148151 | 2.723707  | 0.274441  |
| 19 | 1  | -2.538061 | 2.302675  | -0.656761 |
| 20 | 1  | -2.793270 | 2.392173  | 1.092337  |
| 21 | 1  | -2.234814 | 3.816528  | 0.206376  |
| 22 | 6  | 0.130255  | 2.581635  | -1.985765 |
| 23 | 1  | 0.215758  | 3.658275  | -2.187950 |
| 24 | 1  | 0.877174  | 2.063289  | -2.595177 |
| 25 | 1  | -0.855559 | 2.256188  | -2.328083 |
| 26 | 6  | 1.441121  | -2.222659 | 1.489975  |
| 27 | 7  | 1.507671  | -1.326815 | 0.531619  |
| 28 | 6  | 0.438122  | -1.890966 | 2.477053  |
| 29 | 6  | 0.521449  | -2.451752 | 3.874037  |
| 30 | 1  | -0.267872 | -2.031185 | 4.502452  |
| 31 | 1  | 0.403006  | -3.544229 | 3.868949  |
| 32 | 1  | 1.490271  | -2.235422 | 4.341316  |
| 33 | 6  | 2.295189  | -3.452550 | 1.584006  |
| 34 | 1  | 1.673980  | -4.336923 | 1.760975  |
| 35 | 1  | 2.891900  | -3.614812 | 0.688334  |
| 36 | 1  | 2.971231  | -3.356137 | 2.443056  |
| 37 | 6  | -0.553190 | -1.034631 | 2.039363  |
| 38 | 1  | -1.261452 | -0.697440 | 2.787917  |
| 39 | 8  | 2.244248  | -1.742433 | -0.614570 |
| 40 | 6  | 3.477197  | -1.154908 | -0.761844 |
| 41 | 8  | 3.967341  | -0.460779 | 0.090468  |
| 42 | 6  | 4.102140  | -1.546220 | -2.106067 |
| 43 | 6  | 3.120916  | -1.213873 | -3.261284 |
| 44 | 1  | 2.872841  | -0.146582 | -3.279268 |
| 45 | 1  | 3.595737  | -1.466825 | -4.215050 |
| 46 | 1  | 2.192658  | -1.785484 | -3.176296 |
| 47 | 6  | 5.418602  | -0.760601 | -2.285192 |
| 48 | 1  | 5.877047  | -1.042174 | -3.238570 |
| 49 | 1  | 5.239052  | 0.319478  | -2.296613 |
| 50 | 1  | 6.128597  | -0.981515 | -1.482476 |
| 51 | 6  | 4.395958  | -3.072985 | -2.088546 |
| 52 | 1  | 4.880526  | -3.351457 | -3.030275 |
| 53 | 1  | 5.072113  | -3.338538 | -1.267968 |
| 54 | 1  | 3.475842  | -3.657053 | -1.992244 |
| 55 | 6  | -1.073771 | -0.775614 | -0.666121 |
| 56 | 1  | -1.790561 | -0.116849 | -1.150683 |
| 57 | 1  | -0.582081 | -1.425328 | -1.387688 |
| 58 | 6  | -1.571805 | -1.477544 | 0.553741  |
| 59 | 6  | -1.454210 | -3.005750 | 0.459647  |
| 60 | 1  | -0.451720 | -3.320855 | 0.165001  |
| 61 | 1  | -1.723448 | -3.490730 | 1.403093  |
| 62 | 1  | -2.138122 | -3.351059 | -0.325934 |
| 63 | 6  | -2.962186 | -1.015650 | 1.041100  |

|    |   |           |           |           |
|----|---|-----------|-----------|-----------|
| 64 | 1 | -3.172964 | -1.454509 | 2.022719  |
| 65 | 1 | -2.955279 | 0.070303  | 1.166786  |
| 66 | 6 | -4.095977 | -1.402131 | 0.074314  |
| 67 | 1 | -4.219761 | -2.489311 | 0.011314  |
| 68 | 1 | -3.883756 | -1.058380 | -0.945941 |
| 69 | 6 | -5.430242 | -0.813503 | 0.491231  |
| 70 | 8 | -5.614644 | -0.068077 | 1.445169  |
| 71 | 8 | -6.420653 | -1.216422 | -0.339701 |
| 72 | 6 | -7.782454 | -0.711687 | -0.058466 |
| 73 | 1 | -7.751492 | 0.381037  | -0.085230 |
| 74 | 1 | -8.059567 | -1.029694 | 0.950403  |
| 75 | 6 | -8.701746 | -1.289345 | -1.118889 |
| 76 | 1 | -9.725045 | -0.940592 | -0.944028 |
| 77 | 1 | -8.397948 | -0.969404 | -2.120556 |
| 78 | 1 | -8.703102 | -2.383337 | -1.085655 |

**23** (E = -1570.395955 au)

| Center Number | Atomic Number | Coordinates (Angstroms) |           |           |
|---------------|---------------|-------------------------|-----------|-----------|
|               |               | X                       | Y         | Z         |
| 1             | 77            | 0.319432                | 0.353440  | 0.895401  |
| 2             | 6             | 1.712370                | 2.282536  | 0.415790  |
| 3             | 6             | 1.571166                | 2.126080  | 1.833861  |
| 4             | 6             | 0.162009                | 2.198375  | 2.126659  |
| 5             | 6             | -0.574146               | 2.326123  | 0.887039  |
| 6             | 6             | 0.397132                | 2.279450  | -0.193487 |
| 7             | 7             | 2.881333                | 2.416241  | -0.253478 |
| 8             | 1             | 2.861732                | 2.311478  | -1.260558 |
| 9             | 1             | 3.718896                | 2.034659  | 0.170529  |
| 10            | 6             | 2.714944                | 2.127980  | 2.813227  |
| 11            | 1             | 2.396507                | 1.785281  | 3.800871  |
| 12            | 1             | 3.531467                | 1.475008  | 2.485795  |
| 13            | 1             | 3.123200                | 3.141434  | 2.929486  |
| 14            | 6             | -0.436746               | 2.315120  | 3.500670  |
| 15            | 1             | -0.502894               | 3.375172  | 3.779555  |
| 16            | 1             | -1.446267               | 1.897901  | 3.538403  |
| 17            | 1             | 0.173129                | 1.812116  | 4.254539  |
| 18            | 6             | -2.026492               | 2.694541  | 0.747765  |
| 19            | 1             | -2.458274               | 2.298341  | -0.175330 |
| 20            | 1             | -2.620395               | 2.320333  | 1.585767  |
| 21            | 1             | -2.132014               | 3.787545  | 0.721979  |
| 22            | 6             | 0.130113                | 2.537927  | -1.652859 |
| 23            | 1             | 0.207381                | 3.610390  | -1.877328 |
| 24            | 1             | 0.838853                | 2.004745  | -2.295926 |
| 25            | 1             | -0.873733               | 2.209333  | -1.933417 |
| 26            | 6             | 1.363724                | -2.170611 | 1.393722  |
| 27            | 7             | 1.534431                | -1.371642 | 0.407292  |
| 28            | 6             | 0.461041                | -1.430931 | 2.334416  |
| 29            | 6             | 0.968383                | -1.287176 | 3.757874  |
| 30            | 1             | 0.325204                | -0.618809 | 4.335259  |
| 31            | 1             | 0.959039                | -2.267644 | 4.253480  |
| 32            | 1             | 1.993867                | -0.906296 | 3.789488  |
| 33            | 6             | 1.971995                | -3.513534 | 1.624293  |
| 34            | 1             | 1.211044                | -4.221515 | 1.967349  |
| 35            | 1             | 2.450005                | -3.896080 | 0.721539  |
| 36            | 1             | 2.727424                | -3.437668 | 2.416907  |
| 37            | 6             | -0.884728               | -1.170686 | 2.000946  |
| 38            | 1             | -1.459217               | -0.750459 | 2.822211  |
| 39            | 8             | 2.215329                | -1.852639 | -0.732515 |
| 40            | 6             | 3.438489                | -1.252553 | -0.964890 |
| 41            | 8             | 3.943781                | -0.503475 | -0.173638 |

|    |   |           |           |           |
|----|---|-----------|-----------|-----------|
| 42 | 6 | 3.991712  | -1.678559 | -2.327346 |
| 43 | 6 | 3.092144  | -1.050772 | -3.429673 |
| 44 | 1 | 3.065058  | 0.041946  | -3.347461 |
| 45 | 1 | 3.503153  | -1.307274 | -4.411721 |
| 46 | 1 | 2.068410  | -1.432788 | -3.374784 |
| 47 | 6 | 5.436112  | -1.151176 | -2.459234 |
| 48 | 1 | 5.834920  | -1.440721 | -3.436679 |
| 49 | 1 | 5.472413  | -0.060316 | -2.381745 |
| 50 | 1 | 6.085716  | -1.571449 | -1.684434 |
| 51 | 6 | 3.977039  | -3.225317 | -2.451903 |
| 52 | 1 | 4.413564  | -3.506846 | -3.415761 |
| 53 | 1 | 4.572497  | -3.693006 | -1.659736 |
| 54 | 1 | 2.959935  | -3.623871 | -2.406843 |
| 55 | 6 | -1.117971 | -0.685931 | -0.288969 |
| 56 | 1 | -1.845884 | 0.014229  | -0.697971 |
| 57 | 1 | -0.628685 | -1.211987 | -1.110922 |
| 58 | 6 | -1.715984 | -1.626210 | 0.781776  |
| 59 | 6 | -1.574721 | -3.127534 | 0.460070  |
| 60 | 1 | -0.540501 | -3.402757 | 0.235312  |
| 61 | 1 | -1.923015 | -3.742991 | 1.299301  |
| 62 | 1 | -2.168632 | -3.382869 | -0.424627 |
| 63 | 6 | -3.195999 | -1.278619 | 1.102076  |
| 64 | 1 | -3.498890 | -1.832530 | 2.002286  |
| 65 | 1 | -3.253648 | -0.212615 | 1.353887  |
| 66 | 6 | -4.184734 | -1.574121 | -0.033632 |
| 67 | 1 | -4.317043 | -2.649676 | -0.190851 |
| 68 | 1 | -3.813556 | -1.169941 | -0.986755 |
| 69 | 6 | -5.554024 | -0.968032 | 0.204668  |
| 70 | 8 | -5.824553 | -0.118404 | 1.044977  |
| 71 | 8 | -6.471659 | -1.474667 | -0.655319 |
| 72 | 6 | -7.846961 | -0.939975 | -0.563536 |
| 73 | 1 | -7.804467 | 0.138295  | -0.741153 |
| 74 | 1 | -8.211293 | -1.112799 | 0.452795  |
| 75 | 6 | -8.680131 | -1.663406 | -1.605737 |
| 76 | 1 | -9.709902 | -1.292105 | -1.572233 |
| 77 | 1 | -8.287514 | -1.491648 | -2.612905 |
| 78 | 1 | -8.699018 | -2.741226 | -1.416170 |

**24** (E = -1414.3925027 au)

| Center Number | Atomic Number | Coordinates (Angstroms) |           |           |
|---------------|---------------|-------------------------|-----------|-----------|
|               |               | X                       | Y         | Z         |
| 1             | 77            | -0.832423               | 0.057612  | 0.441001  |
| 2             | 6             | -1.315710               | -1.972967 | -0.698544 |
| 3             | 6             | -1.425643               | -0.759805 | -1.521297 |
| 4             | 6             | -2.472113               | 0.048982  | -0.967474 |
| 5             | 6             | -2.891376               | -0.537078 | 0.301129  |
| 6             | 6             | -2.105553               | -1.709585 | 0.525015  |
| 7             | 6             | -0.843213               | -0.528100 | -2.897136 |
| 8             | 1             | -1.293746               | 0.356891  | -3.350452 |
| 9             | 1             | 0.236971                | -0.373346 | -2.877301 |
| 10            | 1             | -1.061371               | -1.378962 | -3.552006 |
| 11            | 6             | -3.169540               | 1.194278  | -1.641221 |
| 12            | 1             | -4.004781               | 0.802176  | -2.237708 |
| 13            | 1             | -3.578742               | 1.895536  | -0.911165 |
| 14            | 1             | -2.508279               | 1.749492  | -2.307382 |
| 15            | 6             | -4.018879               | -0.034767 | 1.154357  |
| 16            | 1             | -3.911864               | -0.344365 | 2.195818  |
| 17            | 1             | -4.086761               | 1.055500  | 1.125862  |
| 18            | 1             | -4.966880               | -0.441963 | 0.777106  |
| 19            | 6             | -2.208515               | -2.556522 | 1.768836  |

|    |   |           |           |           |
|----|---|-----------|-----------|-----------|
| 20 | 1 | -2.480053 | -1.927296 | 2.619026  |
| 21 | 1 | -2.981092 | -3.327751 | 1.665147  |
| 22 | 1 | -1.261660 | -3.040477 | 2.013674  |
| 23 | 8 | -0.233006 | 0.058531  | 2.436540  |
| 24 | 6 | -0.045159 | 1.085636  | 3.216953  |
| 25 | 8 | -0.317994 | 2.252857  | 2.936835  |
| 26 | 6 | 0.523162  | 0.706407  | 4.578919  |
| 27 | 1 | 0.866512  | 1.596383  | 5.110320  |
| 28 | 1 | -0.259437 | 0.220300  | 5.174260  |
| 29 | 1 | 1.346566  | -0.006110 | 4.472725  |
| 30 | 6 | 0.917668  | 2.590538  | -0.443465 |
| 31 | 7 | 0.782572  | 1.396361  | 0.026057  |
| 32 | 6 | -0.293351 | 3.342629  | -0.852019 |
| 33 | 6 | -0.307223 | 3.883271  | -2.267425 |
| 34 | 1 | -1.233110 | 4.436645  | -2.446826 |
| 35 | 1 | 0.535394  | 4.558663  | -2.456006 |
| 36 | 1 | -0.239826 | 3.070952  | -3.001539 |
| 37 | 6 | 2.260624  | 3.261900  | -0.574869 |
| 38 | 1 | 2.137436  | 4.322137  | -0.796912 |
| 39 | 1 | 2.830147  | 3.155827  | 0.351907  |
| 40 | 1 | 2.844529  | 2.802694  | -1.381634 |
| 41 | 6 | -1.248475 | 3.582033  | 0.051896  |
| 42 | 1 | -2.105876 | 4.192913  | -0.210046 |
| 43 | 1 | -1.176095 | 3.201037  | 1.064275  |
| 44 | 8 | 2.012015  | 0.852443  | 0.534838  |
| 45 | 6 | 2.706077  | 0.035910  | -0.329536 |
| 46 | 8 | 2.370298  | -0.131182 | -1.471977 |
| 47 | 6 | 3.907124  | -0.598104 | 0.382677  |
| 48 | 6 | 3.366679  | -1.637648 | 1.405001  |
| 49 | 1 | 2.773158  | -2.412497 | 0.906679  |
| 50 | 1 | 4.215261  | -2.124281 | 1.897180  |
| 51 | 1 | 2.749894  | -1.160758 | 2.172044  |
| 52 | 6 | 4.786952  | -1.304631 | -0.671134 |
| 53 | 1 | 5.642096  | -1.769201 | -0.169615 |
| 54 | 1 | 4.231181  | -2.085778 | -1.198440 |
| 55 | 1 | 5.168382  | -0.595629 | -1.413388 |
| 56 | 6 | 4.733973  | 0.485837  | 1.122907  |
| 57 | 1 | 5.596611  | 0.008405  | 1.599306  |
| 58 | 1 | 5.109375  | 1.245042  | 0.427677  |
| 59 | 1 | 4.145821  | 0.982196  | 1.899350  |
| 60 | 7 | -0.596765 | -3.065375 | -0.950981 |
| 61 | 6 | -0.832959 | -4.363776 | -0.282878 |
| 62 | 1 | -0.730568 | -5.143390 | -1.042247 |
| 63 | 1 | -0.095785 | -4.545305 | 0.505607  |
| 64 | 1 | -1.838784 | -4.417763 | 0.123024  |
| 65 | 6 | 0.518167  | -3.110547 | -1.923816 |
| 66 | 1 | 0.184785  | -3.519233 | -2.882576 |
| 67 | 1 | 0.957069  | -2.127700 | -2.061163 |
| 68 | 1 | 1.287129  | -3.769302 | -1.512342 |

**TS24-25** (E = -1414.3759916 au)

| Center Number | Atomic Number | Coordinates (Angstroms) |           |           |
|---------------|---------------|-------------------------|-----------|-----------|
|               |               | X                       | Y         | Z         |
| 1             | 77            | -0.935418               | 0.426628  | 0.148045  |
| 2             | 6             | -1.138841               | -1.628575 | -1.208606 |
| 3             | 6             | -1.882842               | -0.434997 | -1.630148 |
| 4             | 6             | -2.882841               | -0.161126 | -0.594707 |
| 5             | 6             | -2.569259               | -0.957533 | 0.545923  |
| 6             | 6             | -1.397970               | -1.761825 | 0.227278  |
| 7             | 6             | -2.023305               | 0.104912  | -3.037802 |

|    |   |           |           |           |
|----|---|-----------|-----------|-----------|
| 8  | 1 | -2.830298 | 0.839518  | -3.078378 |
| 9  | 1 | -1.120371 | 0.599560  | -3.400399 |
| 10 | 1 | -2.277142 | -0.700675 | -3.736539 |
| 11 | 6 | -4.095562 | 0.710355  | -0.759163 |
| 12 | 1 | -4.870454 | 0.160824  | -1.309759 |
| 13 | 1 | -4.510055 | 1.000026  | 0.209028  |
| 14 | 1 | -3.877016 | 1.623386  | -1.318961 |
| 15 | 6 | -3.352699 | -1.033132 | 1.825413  |
| 16 | 1 | -2.699777 | -1.182094 | 2.688554  |
| 17 | 1 | -3.932447 | -0.122760 | 1.993256  |
| 18 | 1 | -4.050439 | -1.879690 | 1.780518  |
| 19 | 6 | -0.783122 | -2.724585 | 1.215021  |
| 20 | 1 | -0.824768 | -2.296860 | 2.220204  |
| 21 | 1 | -1.326333 | -3.678555 | 1.241103  |
| 22 | 1 | 0.263727  | -2.928649 | 0.989127  |
| 23 | 8 | -0.492386 | 0.736737  | 2.238304  |
| 24 | 6 | -0.598095 | 1.908953  | 2.718181  |
| 25 | 8 | -0.879882 | 2.923836  | 2.018308  |
| 26 | 6 | -0.377671 | 2.086769  | 4.202420  |
| 27 | 1 | 0.416147  | 2.821680  | 4.370641  |
| 28 | 1 | -1.292562 | 2.478419  | 4.660050  |
| 29 | 1 | -0.109897 | 1.139992  | 4.672771  |
| 30 | 6 | 1.330090  | 2.251948  | -0.688777 |
| 31 | 7 | 1.102397  | 1.085595  | -0.140523 |
| 32 | 6 | 0.118823  | 2.904012  | -1.165750 |
| 33 | 6 | 0.189824  | 4.022284  | -2.177347 |
| 34 | 1 | -0.817454 | 4.358054  | -2.437763 |
| 35 | 1 | 0.742742  | 4.885083  | -1.784244 |
| 36 | 1 | 0.694564  | 3.704408  | -3.098748 |
| 37 | 6 | 2.688945  | 2.881112  | -0.782406 |
| 38 | 1 | 2.840407  | 3.566525  | 0.061858  |
| 39 | 1 | 3.486453  | 2.138307  | -0.759833 |
| 40 | 1 | 2.769091  | 3.468235  | -1.700125 |
| 41 | 6 | -1.038905 | 2.432907  | -0.602539 |
| 42 | 1 | -1.975990 | 2.867999  | -0.941960 |
| 43 | 1 | -0.996258 | 2.496979  | 0.732069  |
| 44 | 8 | 2.198789  | 0.603673  | 0.617007  |
| 45 | 6 | 2.649841  | -0.652327 | 0.275322  |
| 46 | 8 | 2.240143  | -1.249956 | -0.682325 |
| 47 | 6 | 3.727814  | -1.116063 | 1.263300  |
| 48 | 6 | 3.128084  | -1.172851 | 2.694253  |
| 49 | 1 | 2.275571  | -1.859546 | 2.742368  |
| 50 | 1 | 3.894823  | -1.535792 | 3.387011  |
| 51 | 1 | 2.799447  | -0.185522 | 3.030131  |
| 52 | 6 | 4.213842  | -2.517577 | 0.837909  |
| 53 | 1 | 4.984951  | -2.858067 | 1.536507  |
| 54 | 1 | 3.394704  | -3.243626 | 0.848804  |
| 55 | 1 | 4.643596  | -2.502222 | -0.168689 |
| 56 | 6 | 4.913828  | -0.113260 | 1.228783  |
| 57 | 1 | 5.699725  | -0.468692 | 1.903574  |
| 58 | 1 | 5.340454  | -0.037191 | 0.222024  |
| 59 | 1 | 4.606112  | 0.883839  | 1.556266  |
| 60 | 7 | -0.319443 | -2.372141 | -1.950249 |
| 61 | 6 | 0.131842  | -3.718981 | -1.547331 |
| 62 | 1 | 1.134728  | -3.684302 | -1.111296 |
| 63 | 1 | -0.569292 | -4.170493 | -0.850136 |
| 64 | 1 | 0.159628  | -4.338249 | -2.448220 |
| 65 | 6 | 0.301880  | -1.898705 | -3.205439 |
| 66 | 1 | -0.261732 | -2.236900 | -4.080456 |
| 67 | 1 | 0.391035  | -0.816619 | -3.210412 |
| 68 | 1 | 1.310634  | -2.314108 | -3.251981 |

25 (E = -1414.3958097 au)

| Center Number | Atomic Number | Coordinates (Angstroms) |           |           |
|---------------|---------------|-------------------------|-----------|-----------|
|               |               | X                       | Y         | Z         |
| 1             | 77            | -1.007226               | 0.438010  | 0.025124  |
| 2             | 6             | -1.182862               | -1.803967 | -1.056167 |
| 3             | 6             | -1.808689               | -0.600391 | -1.680840 |
| 4             | 6             | -2.899447               | -0.177001 | -0.806725 |
| 5             | 6             | -2.727525               | -0.878065 | 0.425921  |
| 6             | 6             | -1.643363               | -1.840022 | 0.302638  |
| 7             | 6             | -1.672895               | -0.129279 | -3.110211 |
| 8             | 1             | -1.967041               | 0.920607  | -3.182529 |
| 9             | 1             | -0.644262               | -0.203919 | -3.467603 |
| 10            | 1             | -2.320960               | -0.700759 | -3.786957 |
| 11            | 6             | -4.050267               | 0.712904  | -1.187077 |
| 12            | 1             | -4.846368               | 0.112392  | -1.646927 |
| 13            | 1             | -4.471193               | 1.221785  | -0.316011 |
| 14            | 1             | -3.753450               | 1.475352  | -1.912206 |
| 15            | 6             | -3.625559               | -0.767155 | 1.627601  |
| 16            | 1             | -3.055975               | -0.803306 | 2.560019  |
| 17            | 1             | -4.197331               | 0.163465  | 1.613229  |
| 18            | 1             | -4.339902               | -1.601217 | 1.635816  |
| 19            | 6             | -1.368536               | -2.897600 | 1.352011  |
| 20            | 1             | -2.164696               | -2.895386 | 2.101042  |
| 21            | 1             | -1.349163               | -3.896258 | 0.902206  |
| 22            | 1             | -0.424715               | -2.751430 | 1.886408  |
| 23            | 8             | -0.733500               | 0.939286  | 2.199158  |
| 24            | 6             | -0.787605               | 2.016953  | 2.795170  |
| 25            | 8             | -0.946847               | 3.177196  | 2.187168  |
| 26            | 6             | -0.675611               | 2.112977  | 4.287550  |
| 27            | 1             | 0.196739                | 2.719947  | 4.552646  |
| 28            | 1             | -1.560550               | 2.613776  | 4.693819  |
| 29            | 1             | -0.578760               | 1.119024  | 4.722451  |
| 30            | 6             | 1.308287                | 2.281869  | -0.449524 |
| 31            | 7             | 1.053046                | 1.060849  | -0.055731 |
| 32            | 6             | 0.130190                | 2.979195  | -0.953451 |
| 33            | 6             | 0.262224                | 4.321796  | -1.642634 |
| 34            | 1             | -0.724181               | 4.673586  | -1.959600 |
| 35            | 1             | 0.696560                | 5.084756  | -0.984233 |
| 36            | 1             | 0.900477                | 4.257989  | -2.533349 |
| 37            | 6             | 2.656027                | 2.935777  | -0.392804 |
| 38            | 1             | 2.567350                | 3.937535  | 0.039583  |
| 39            | 1             | 3.376759                | 2.363894  | 0.188076  |
| 40            | 1             | 3.043261                | 3.059169  | -1.412291 |
| 41            | 6             | -1.039695               | 2.308183  | -0.747888 |
| 42            | 1             | -1.962879               | 2.777979  | -1.088035 |
| 43            | 1             | -0.980699               | 3.041851  | 1.211688  |
| 44            | 8             | 2.106579                | 0.417956  | 0.652759  |
| 45            | 6             | 2.892743                | -0.432112 | -0.088737 |
| 46            | 8             | 2.746895                | -0.588757 | -1.271812 |
| 47            | 6             | 3.967507                | -1.076409 | 0.800715  |
| 48            | 6             | 3.314668                | -1.760198 | 2.030274  |
| 49            | 1             | 2.618576                | -2.549914 | 1.727224  |
| 50            | 1             | 4.099468                | -2.220749 | 2.639555  |
| 51            | 1             | 2.775194                | -1.039798 | 2.651229  |
| 52            | 6             | 4.745816                | -2.114933 | -0.035184 |
| 53            | 1             | 5.522702                | -2.567706 | 0.589473  |
| 54            | 1             | 4.089827                | -2.912776 | -0.397540 |
| 55            | 1             | 5.227230                | -1.650028 | -0.900969 |
| 56            | 6             | 4.938938                | 0.039024  | 1.280993  |
| 57            | 1             | 5.739976                | -0.418570 | 1.871307  |
| 58            | 1             | 5.399088                | 0.559224  | 0.433202  |
| 59            | 1             | 4.427570                | 0.772385  | 1.911669  |

|    |   |           |           |           |
|----|---|-----------|-----------|-----------|
| 60 | 7 | -0.299046 | -2.628584 | -1.644290 |
| 61 | 6 | 0.714605  | -3.393783 | -0.897955 |
| 62 | 1 | 1.675938  | -3.274199 | -1.407068 |
| 63 | 1 | 0.816836  | -3.013518 | 0.113767  |
| 64 | 1 | 0.463956  | -4.459715 | -0.867595 |
| 65 | 6 | -0.219345 | -2.832768 | -3.102324 |
| 66 | 1 | 0.609133  | -2.269384 | -3.546048 |
| 67 | 1 | -0.045089 | -3.898789 | -3.278648 |
| 68 | 1 | -1.154008 | -2.562451 | -3.586556 |

**1-N(CH<sub>3</sub>)<sub>2</sub>** (E = -817.8647376 au)

| Center Number | Atomic Number | Coordinates (Angstroms) |           |           |
|---------------|---------------|-------------------------|-----------|-----------|
|               |               | X                       | Y         | Z         |
| 1             | 77            | -0.122013               | 0.051871  | -0.727291 |
| 2             | 6             | 0.478382                | 0.851143  | 1.419295  |
| 3             | 6             | 1.331185                | 1.278843  | 0.286731  |
| 4             | 6             | 2.002793                | 0.125385  | -0.249424 |
| 5             | 6             | 1.383082                | -1.037155 | 0.319803  |
| 6             | 6             | 0.323748                | -0.601295 | 1.230926  |
| 7             | 7             | -0.111141               | 1.631820  | 2.315130  |
| 8             | 6             | 1.611344                | 2.686223  | -0.171754 |
| 9             | 1             | 1.842386                | 2.685453  | -1.239984 |
| 10            | 1             | 0.752960                | 3.342434  | -0.019205 |
| 11            | 1             | 2.476689                | 3.111343  | 0.351753  |
| 12            | 6             | 3.142031                | 0.130019  | -1.227917 |
| 13            | 1             | 4.095153                | 0.100851  | -0.683468 |
| 14            | 1             | 3.106763                | -0.739911 | -1.888724 |
| 15            | 1             | 3.139981                | 1.028636  | -1.848841 |
| 16            | 6             | 1.789038                | -2.457963 | 0.067513  |
| 17            | 1             | 0.931555                | -3.134846 | 0.075264  |
| 18            | 1             | 2.295173                | -2.560035 | -0.895062 |
| 19            | 1             | 2.484581                | -2.784219 | 0.852504  |
| 20            | 6             | -0.462932               | -1.565843 | 2.081270  |
| 21            | 1             | -0.333891               | -2.584903 | 1.712117  |
| 22            | 1             | -0.101665               | -1.537878 | 3.116423  |
| 23            | 1             | -1.529971               | -1.344026 | 2.073523  |
| 24            | 8             | -2.015319               | -0.192462 | -1.390947 |
| 25            | 6             | -3.144512               | -0.290233 | -0.705744 |
| 26            | 8             | -3.224802               | -0.156751 | 0.505560  |
| 27            | 6             | -4.343943               | -0.578832 | -1.587250 |
| 28            | 1             | -4.198752               | -1.528989 | -2.113141 |
| 29            | 1             | -5.255701               | -0.627530 | -0.990009 |
| 30            | 1             | -4.443777               | 0.202423  | -2.348526 |
| 31            | 6             | -1.306338               | 1.211526  | 3.089126  |
| 32            | 1             | -1.022008               | 0.626959  | 3.968110  |
| 33            | 1             | -1.816121               | 2.116722  | 3.422055  |
| 34            | 1             | -1.988709               | 0.650735  | 2.453114  |
| 35            | 6             | 0.352686                | 3.004313  | 2.617952  |
| 36            | 1             | 0.309592                | 3.130870  | 3.702371  |
| 37            | 1             | 1.382299                | 3.145847  | 2.302123  |
| 38            | 1             | -0.294322               | 3.753033  | 2.150846  |

**26** (E = -1185.239128 au)

| Center Number | Atomic Number | Coordinates (Angstroms) |           |           |
|---------------|---------------|-------------------------|-----------|-----------|
|               |               | X                       | Y         | Z         |
| 1             | 77            | -0.727221               | 0.459343  | 0.020407  |
| 2             | 6             | -1.978808               | -1.580357 | -0.237461 |

|    |   |           |           |           |
|----|---|-----------|-----------|-----------|
| 3  | 6 | -2.749441 | -0.348152 | 0.029333  |
| 4  | 6 | -2.362327 | 0.124157  | 1.330385  |
| 5  | 6 | -1.270656 | -0.731412 | 1.805563  |
| 6  | 6 | -1.012926 | -1.741295 | 0.840263  |
| 7  | 7 | -2.072457 | -2.346640 | -1.333443 |
| 8  | 6 | -3.885586 | 0.235980  | -0.775535 |
| 9  | 1 | -4.013323 | 1.291538  | -0.523496 |
| 10 | 1 | -3.699033 | 0.178592  | -1.849812 |
| 11 | 1 | -4.835469 | -0.268924 | -0.559064 |
| 12 | 6 | -3.066863 | 1.163287  | 2.155235  |
| 13 | 1 | -3.845701 | 0.685030  | 2.764722  |
| 14 | 1 | -2.374783 | 1.673354  | 2.830029  |
| 15 | 1 | -3.547494 | 1.919092  | 1.529719  |
| 16 | 6 | -0.640328 | -0.628280 | 3.163602  |
| 17 | 1 | 0.384368  | -1.006729 | 3.165605  |
| 18 | 1 | -0.621175 | 0.407456  | 3.511364  |
| 19 | 1 | -1.222149 | -1.214003 | 3.888700  |
| 20 | 6 | -0.112541 | -2.932754 | 1.077149  |
| 21 | 1 | -0.654362 | -3.863297 | 0.874830  |
| 22 | 1 | 0.787748  | -2.932225 | 0.458358  |
| 23 | 1 | 0.204331  | -2.960786 | 2.122360  |
| 24 | 6 | 1.408874  | 2.453122  | -0.421221 |
| 25 | 7 | 1.247223  | 1.211049  | -0.052111 |
| 26 | 6 | 0.146184  | 3.155353  | -0.703103 |
| 27 | 6 | 0.164074  | 4.615257  | -1.105731 |
| 28 | 1 | -0.861967 | 4.972753  | -1.234525 |
| 29 | 1 | 0.648532  | 5.245170  | -0.348492 |
| 30 | 1 | 0.696294  | 4.775661  | -2.052406 |
| 31 | 6 | 2.737236  | 3.133549  | -0.528009 |
| 32 | 1 | 2.833793  | 3.867776  | 0.282971  |
| 33 | 1 | 3.570981  | 2.437406  | -0.464631 |
| 34 | 1 | 2.795231  | 3.689524  | -1.468967 |
| 35 | 6 | -0.963945 | 2.389955  | -0.551888 |
| 36 | 1 | -1.935738 | 2.847975  | -0.735374 |
| 37 | 8 | 2.433970  | 0.535392  | 0.324516  |
| 38 | 6 | 2.734690  | -0.567654 | -0.436593 |
| 39 | 8 | 2.072511  | -0.900316 | -1.385504 |
| 40 | 6 | 4.006921  | -1.248350 | 0.086044  |
| 41 | 6 | 3.832722  | -1.625617 | 1.581294  |
| 42 | 1 | 2.992526  | -2.313398 | 1.725395  |
| 43 | 1 | 4.742158  | -2.126006 | 1.930337  |
| 44 | 1 | 3.668763  | -0.739839 | 2.201387  |
| 45 | 6 | 4.272274  | -2.514352 | -0.755843 |
| 46 | 1 | 5.185562  | -2.999322 | -0.396357 |
| 47 | 1 | 3.448819  | -3.231032 | -0.674183 |
| 48 | 1 | 4.406324  | -2.268270 | -1.813763 |
| 49 | 6 | 5.195220  | -0.257413 | -0.067147 |
| 50 | 1 | 6.117901  | -0.758260 | 0.244316  |
| 51 | 1 | 5.316777  | 0.060948  | -1.108777 |
| 52 | 1 | 5.060679  | 0.629229  | 0.559318  |
| 53 | 6 | -0.936557 | -3.125391 | -1.871269 |
| 54 | 1 | 0.009523  | -2.705789 | -1.538410 |
| 55 | 1 | -1.005437 | -4.180983 | -1.590118 |
| 56 | 1 | -0.972529 | -3.053352 | -2.961994 |
| 57 | 6 | -3.304965 | -2.468075 | -2.136637 |
| 58 | 1 | -4.176201 | -2.170516 | -1.559427 |
| 59 | 1 | -3.243404 | -1.877497 | -3.056849 |
| 60 | 1 | -3.420294 | -3.521522 | -2.407903 |

27 (E = -1648.9820178 au)

| Center Number | Atomic | Coordinates (Angstroms) |  |  |
|---------------|--------|-------------------------|--|--|
|---------------|--------|-------------------------|--|--|

|    | Number | X         | Y         | Z         |
|----|--------|-----------|-----------|-----------|
| 1  | 77     | 0.174594  | 0.171621  | 0.722656  |
| 2  | 6      | 1.677511  | 2.190115  | 0.541327  |
| 3  | 6      | 0.951490  | 1.991527  | 1.793186  |
| 4  | 6      | -0.474094 | 2.110998  | 1.509633  |
| 5  | 6      | -0.618975 | 2.199252  | 0.087066  |
| 6  | 6      | 0.684998  | 2.107587  | -0.523387 |
| 7  | 7      | 3.002228  | 2.367333  | 0.413550  |
| 8  | 6      | 1.505115  | 2.146495  | 3.193316  |
| 9  | 1      | 0.696707  | 2.098155  | 3.925684  |
| 10 | 1      | 2.232954  | 1.380675  | 3.463417  |
| 11 | 1      | 1.985777  | 3.127264  | 3.298139  |
| 12 | 6      | -1.547314 | 2.378485  | 2.531521  |
| 13 | 1      | -1.525029 | 3.433256  | 2.836159  |
| 14 | 1      | -2.540952 | 2.164468  | 2.131576  |
| 15 | 1      | -1.416349 | 1.770474  | 3.430381  |
| 16 | 6      | -1.870634 | 2.574976  | -0.658015 |
| 17 | 1      | -2.026214 | 1.979541  | -1.561707 |
| 18 | 1      | -2.762911 | 2.497499  | -0.035132 |
| 19 | 1      | -1.778662 | 3.622221  | -0.975578 |
| 20 | 6      | 0.893953  | 2.182885  | -2.018046 |
| 21 | 1      | 0.927881  | 3.221950  | -2.372071 |
| 22 | 1      | 1.814463  | 1.686043  | -2.326600 |
| 23 | 1      | 0.067262  | 1.692384  | -2.538861 |
| 24 | 6      | 1.857413  | -2.156804 | 1.527169  |
| 25 | 7      | 1.618460  | -1.372520 | 0.503844  |
| 26 | 6      | 1.116336  | -1.785161 | 2.716433  |
| 27 | 6      | 1.324056  | -2.503067 | 4.036292  |
| 28 | 1      | 0.665656  | -2.072168 | 4.796950  |
| 29 | 1      | 1.095282  | -3.574051 | 3.964585  |
| 30 | 1      | 2.356755  | -2.409650 | 4.395584  |
| 31 | 6      | 2.769677  | -3.346716 | 1.437669  |
| 32 | 1      | 2.958123  | -3.765327 | 2.426380  |
| 33 | 1      | 2.321307  | -4.127422 | 0.811728  |
| 34 | 1      | 3.728145  | -3.075654 | 0.984882  |
| 35 | 6      | 0.205702  | -0.796469 | 2.510696  |
| 36 | 1      | -0.436514 | -0.489672 | 3.334474  |
| 37 | 8      | 2.083069  | -1.882839 | -0.739467 |
| 38 | 6      | 3.202080  | -1.282677 | -1.266644 |
| 39 | 8      | 3.827201  | -0.443164 | -0.677663 |
| 40 | 6      | 3.517933  | -1.861885 | -2.653323 |
| 41 | 6      | 2.301501  | -1.664990 | -3.596642 |
| 42 | 1      | 2.040576  | -0.605433 | -3.696208 |
| 43 | 1      | 2.557523  | -2.044890 | -4.591500 |
| 44 | 1      | 1.423245  | -2.209238 | -3.238511 |
| 45 | 6      | 4.749655  | -1.126181 | -3.222378 |
| 46 | 1      | 4.990200  | -1.537385 | -4.208185 |
| 47 | 1      | 4.556430  | -0.054473 | -3.334623 |
| 48 | 1      | 5.622897  | -1.249925 | -2.574484 |
| 49 | 6      | 3.828871  | -3.377307 | -2.508225 |
| 50 | 1      | 4.094781  | -3.781026 | -3.490924 |
| 51 | 1      | 4.674111  | -3.547198 | -1.831748 |
| 52 | 1      | 2.962723  | -3.930375 | -2.133681 |
| 53 | 6      | -0.917202 | -0.831259 | -0.898080 |
| 54 | 1      | -1.371715 | -0.074688 | -1.527287 |
| 55 | 1      | -0.271300 | -1.525501 | -1.421799 |
| 56 | 6      | -1.601967 | -1.267415 | 0.257114  |
| 57 | 6      | -1.428943 | -2.707333 | 0.713414  |
| 58 | 1      | -0.423345 | -3.084780 | 0.522627  |
| 59 | 1      | -1.655512 | -2.830633 | 1.776466  |
| 60 | 1      | -2.124932 | -3.340690 | 0.146188  |
| 61 | 6      | -2.929948 | -0.636208 | 0.662986  |

|    |   |           |           |           |
|----|---|-----------|-----------|-----------|
| 62 | 1 | -3.014585 | -0.625339 | 1.755822  |
| 63 | 1 | -2.966935 | 0.399806  | 0.326995  |
| 64 | 6 | -4.141189 | -1.384858 | 0.066527  |
| 65 | 1 | -4.225645 | -2.402095 | 0.466257  |
| 66 | 1 | -4.033100 | -1.490695 | -1.021387 |
| 67 | 6 | -5.453371 | -0.676187 | 0.337534  |
| 68 | 8 | -5.583638 | 0.373326  | 0.955513  |
| 69 | 8 | -6.495838 | -1.355592 | -0.199322 |
| 70 | 6 | -7.844335 | -0.777349 | -0.014263 |
| 71 | 1 | -7.843086 | 0.229975  | -0.439638 |
| 72 | 1 | -8.036971 | -0.703874 | 1.059673  |
| 73 | 6 | -8.826271 | -1.698484 | -0.714903 |
| 74 | 1 | -9.841965 | -1.305506 | -0.599540 |
| 75 | 1 | -8.606094 | -1.768266 | -1.784796 |
| 76 | 1 | -8.798155 | -2.704698 | -0.285094 |
| 77 | 6 | 3.625075  | 2.931027  | -0.797876 |
| 78 | 1 | 4.021196  | 2.144977  | -1.449195 |
| 79 | 1 | 2.917716  | 3.551059  | -1.343383 |
| 80 | 1 | 4.452932  | 3.570584  | -0.477784 |
| 81 | 6 | 3.970254  | 1.886179  | 1.420971  |
| 82 | 1 | 4.181717  | 2.645524  | 2.180127  |
| 83 | 1 | 3.608052  | 0.973192  | 1.889741  |
| 84 | 1 | 4.897242  | 1.641147  | 0.900112  |

**TS27-28** (E = -1648.9394332 au)

| Center Number | Atomic Number | Coordinates (Angstroms) |           |           |
|---------------|---------------|-------------------------|-----------|-----------|
|               |               | X                       | Y         | Z         |
| 1             | 77            | 0.272079                | 0.376348  | 0.370702  |
| 2             | 6             | 1.768148                | 2.303634  | 0.614920  |
| 3             | 6             | 0.836800                | 2.259655  | 1.697100  |
| 4             | 6             | -0.500692               | 2.311238  | 1.141054  |
| 5             | 6             | -0.412836               | 2.354316  | -0.293616 |
| 6             | 6             | 0.977116                | 2.209345  | -0.644795 |
| 7             | 7             | 3.115058                | 2.370504  | 0.713438  |
| 8             | 6             | 1.139690                | 2.415574  | 3.169215  |
| 9             | 1             | 0.288076                | 2.873788  | 3.680588  |
| 10            | 1             | 1.349247                | 1.465478  | 3.672804  |
| 11            | 1             | 2.004417                | 3.070563  | 3.317077  |
| 12            | 6             | -1.741939               | 2.559681  | 1.953695  |
| 13            | 1             | -1.755253               | 3.602277  | 2.299302  |
| 14            | 1             | -2.648270               | 2.396704  | 1.366280  |
| 15            | 1             | -1.787708               | 1.918930  | 2.839443  |
| 16            | 6             | -1.540464               | 2.643167  | -1.247060 |
| 17            | 1             | -1.379836               | 2.170289  | -2.219419 |
| 18            | 1             | -2.501818               | 2.297503  | -0.858355 |
| 19            | 1             | -1.616490               | 3.726448  | -1.410119 |
| 20            | 6             | 1.498315                | 2.271892  | -2.059697 |
| 21            | 1             | 1.672159                | 3.310676  | -2.372854 |
| 22            | 1             | 2.432745                | 1.720252  | -2.172382 |
| 23            | 1             | 0.768713                | 1.840390  | -2.749947 |
| 24            | 6             | 1.604156                | -2.137153 | 1.319768  |
| 25            | 7             | 1.567388                | -1.294154 | 0.304722  |
| 26            | 6             | 0.703822                | -1.764675 | 2.375873  |
| 27            | 6             | 0.893814                | -2.246770 | 3.794463  |
| 28            | 1             | 0.206850                | -1.724317 | 4.466276  |
| 29            | 1             | 0.688251                | -3.322570 | 3.882357  |
| 30            | 1             | 1.917479                | -2.079984 | 4.150461  |
| 31            | 6             | 2.471815                | -3.363506 | 1.331392  |
| 32            | 1             | 2.561293                | -3.757030 | 2.345061  |
| 33            | 1             | 2.039458                | -4.149263 | 0.700126  |

|    |   |           |           |           |
|----|---|-----------|-----------|-----------|
| 34 | 1 | 3.471711  | -3.146751 | 0.945618  |
| 35 | 6 | -0.331246 | -0.929595 | 1.979248  |
| 36 | 1 | -0.971156 | -0.547683 | 2.767028  |
| 37 | 8 | 2.106320  | -1.858749 | -0.886461 |
| 38 | 6 | 3.207538  | -1.224185 | -1.411496 |
| 39 | 8 | 3.786427  | -0.344278 | -0.834019 |
| 40 | 6 | 3.564039  | -1.825036 | -2.777793 |
| 41 | 6 | 2.359300  | -1.662849 | -3.743538 |
| 42 | 1 | 2.087066  | -0.608682 | -3.867189 |
| 43 | 1 | 2.634911  | -2.059572 | -4.726514 |
| 44 | 1 | 1.482730  | -2.209920 | -3.385156 |
| 45 | 6 | 4.794518  | -1.081046 | -3.337942 |
| 46 | 1 | 5.062833  | -1.510699 | -4.308577 |
| 47 | 1 | 4.586014  | -0.015823 | -3.479675 |
| 48 | 1 | 5.655962  | -1.174937 | -2.669317 |
| 49 | 6 | 3.894737  | -3.332470 | -2.598919 |
| 50 | 1 | 4.187371  | -3.749374 | -3.568384 |
| 51 | 1 | 4.727786  | -3.477033 | -1.901566 |
| 52 | 1 | 3.029502  | -3.891972 | -2.232165 |
| 53 | 6 | -1.112390 | -0.793643 | -0.675445 |
| 54 | 1 | -1.898220 | -0.171961 | -1.097658 |
| 55 | 1 | -0.692934 | -1.465093 | -1.422826 |
| 56 | 6 | -1.462690 | -1.458743 | 0.622372  |
| 57 | 6 | -1.310322 | -2.986010 | 0.564771  |
| 58 | 1 | -0.334393 | -3.285337 | 0.180301  |
| 59 | 1 | -1.467168 | -3.445059 | 1.545930  |
| 60 | 1 | -2.059490 | -3.377226 | -0.134572 |
| 61 | 6 | -2.820938 | -1.024068 | 1.215472  |
| 62 | 1 | -2.927822 | -1.432500 | 2.227309  |
| 63 | 1 | -2.843044 | 0.064559  | 1.304859  |
| 64 | 6 | -4.022315 | -1.483986 | 0.369350  |
| 65 | 1 | -4.135561 | -2.573154 | 0.384022  |
| 66 | 1 | -3.894231 | -1.203119 | -0.684622 |
| 67 | 6 | -5.328446 | -0.876684 | 0.844563  |
| 68 | 8 | -5.440498 | 0.021927  | 1.669115  |
| 69 | 8 | -6.385999 | -1.450925 | 0.223299  |
| 70 | 6 | -7.729810 | -0.936322 | 0.565351  |
| 71 | 1 | -7.752634 | 0.132480  | 0.335256  |
| 72 | 1 | -7.878396 | -1.066690 | 1.640787  |
| 73 | 6 | -8.732994 | -1.725165 | -0.256160 |
| 74 | 1 | -9.745778 | -1.374896 | -0.030512 |
| 75 | 1 | -8.556035 | -1.591895 | -1.328035 |
| 76 | 1 | -8.680617 | -2.793146 | -0.022429 |
| 77 | 6 | 3.969460  | 2.961389  | -0.327509 |
| 78 | 1 | 4.432513  | 2.192590  | -0.955404 |
| 79 | 1 | 3.402042  | 3.655523  | -0.944822 |
| 80 | 1 | 4.762703  | 3.528269  | 0.171980  |
| 81 | 6 | 3.862712  | 1.711632  | 1.796961  |
| 82 | 1 | 4.323678  | 2.444557  | 2.468921  |
| 83 | 1 | 3.209536  | 1.052750  | 2.365081  |
| 84 | 1 | 4.652164  | 1.100199  | 1.347281  |

28 (E = -1648.9702251 au)

| Center Number | Atomic Number | Coordinates (Angstroms) |          |          |
|---------------|---------------|-------------------------|----------|----------|
|               |               | X                       | Y        | Z        |
| 1             | 77            | 0.423384                | 0.372100 | 0.941350 |
| 2             | 6             | 1.894446                | 2.388436 | 0.605506 |
| 3             | 6             | 1.578757                | 2.176823 | 1.998742 |
| 4             | 6             | 0.142404                | 2.205196 | 2.128203 |
| 5             | 6             | -0.456526               | 2.339357 | 0.823782 |

|    |   |           |           |           |
|----|---|-----------|-----------|-----------|
| 6  | 6 | 0.620984  | 2.293596  | -0.144448 |
| 7  | 7 | 3.119298  | 2.578383  | 0.087786  |
| 8  | 6 | 2.520589  | 2.307311  | 3.177056  |
| 9  | 1 | 1.957388  | 2.534413  | 4.085837  |
| 10 | 1 | 3.107800  | 1.405686  | 3.377589  |
| 11 | 1 | 3.224265  | 3.131658  | 3.015919  |
| 12 | 6 | -0.607530 | 2.323858  | 3.427603  |
| 13 | 1 | -0.651886 | 3.378541  | 3.730820  |
| 14 | 1 | -1.633736 | 1.962206  | 3.329524  |
| 15 | 1 | -0.125822 | 1.766236  | 4.233405  |
| 16 | 6 | -1.890680 | 2.696138  | 0.538793  |
| 17 | 1 | -2.231168 | 2.293895  | -0.418736 |
| 18 | 1 | -2.563210 | 2.327982  | 1.317778  |
| 19 | 1 | -1.995165 | 3.788938  | 0.494496  |
| 20 | 6 | 0.398702  | 2.455164  | -1.630828 |
| 21 | 1 | 0.352064  | 3.512147  | -1.924554 |
| 22 | 1 | 1.181434  | 1.967539  | -2.214080 |
| 23 | 1 | -0.553527 | 1.997725  | -1.912800 |
| 24 | 6 | 1.428610  | -2.163319 | 1.509468  |
| 25 | 7 | 1.640476  | -1.429309 | 0.478339  |
| 26 | 6 | 0.526617  | -1.372674 | 2.399895  |
| 27 | 6 | 0.990449  | -1.201555 | 3.835955  |
| 28 | 1 | 0.325857  | -0.530192 | 4.384738  |
| 29 | 1 | 0.978103  | -2.172662 | 4.349432  |
| 30 | 1 | 2.010784  | -0.808600 | 3.889499  |
| 31 | 6 | 1.982239  | -3.517489 | 1.819998  |
| 32 | 1 | 2.730035  | -3.426588 | 2.618574  |
| 33 | 1 | 1.190325  | -4.175632 | 2.191127  |
| 34 | 1 | 2.456754  | -3.969298 | 0.948844  |
| 35 | 6 | -0.813356 | -1.121109 | 2.025790  |
| 36 | 1 | -1.413869 | -0.691136 | 2.823412  |
| 37 | 8 | 2.282951  | -2.081237 | -0.596246 |
| 38 | 6 | 2.979278  | -1.278886 | -1.475291 |
| 39 | 8 | 3.157595  | -0.108192 | -1.288249 |
| 40 | 6 | 3.456584  | -2.109685 | -2.672877 |
| 41 | 6 | 2.211532  | -2.601235 | -3.462631 |
| 42 | 1 | 1.599227  | -1.758995 | -3.804587 |
| 43 | 1 | 2.545741  | -3.157566 | -4.344797 |
| 44 | 1 | 1.588453  | -3.263320 | -2.854358 |
| 45 | 6 | 4.332844  | -1.213669 | -3.573069 |
| 46 | 1 | 4.671792  | -1.794552 | -4.436855 |
| 47 | 1 | 3.773994  | -0.346727 | -3.938613 |
| 48 | 1 | 5.214456  | -0.850775 | -3.034833 |
| 49 | 6 | 4.280940  | -3.327068 | -2.175100 |
| 50 | 1 | 4.657044  | -3.879685 | -3.042526 |
| 51 | 1 | 5.141443  | -3.006555 | -1.576814 |
| 52 | 1 | 3.671287  | -4.007809 | -1.574495 |
| 53 | 6 | -0.982284 | -0.670311 | -0.277409 |
| 54 | 1 | -1.700132 | 0.024545  | -0.712438 |
| 55 | 1 | -0.475500 | -1.206585 | -1.082097 |
| 56 | 6 | -1.608963 | -1.597845 | 0.789158  |
| 57 | 6 | -1.456292 | -3.103196 | 0.491578  |
| 58 | 1 | -0.415558 | -3.379048 | 0.302048  |
| 59 | 1 | -1.828584 | -3.707994 | 1.328412  |
| 60 | 1 | -2.022930 | -3.372137 | -0.406952 |
| 61 | 6 | -3.099020 | -1.251348 | 1.060480  |
| 62 | 1 | -3.426996 | -1.794099 | 1.958698  |
| 63 | 1 | -3.167666 | -0.182125 | 1.295758  |
| 64 | 6 | -4.051490 | -1.566290 | -0.100572 |
| 65 | 1 | -4.165917 | -2.644743 | -0.253032 |
| 66 | 1 | -3.658112 | -1.165460 | -1.045993 |
| 67 | 6 | -5.435866 | -0.979578 | 0.093076  |
| 68 | 8 | -5.752094 | -0.151333 | 0.938710  |

|    |   |           |           |           |
|----|---|-----------|-----------|-----------|
| 69 | 8 | -6.310826 | -1.480450 | -0.813978 |
| 70 | 6 | -7.697369 | -0.970671 | -0.765799 |
| 71 | 1 | -7.666591 | 0.112808  | -0.911064 |
| 72 | 1 | -8.101309 | -1.178899 | 0.228781  |
| 73 | 6 | -8.472867 | -1.677384 | -1.862661 |
| 74 | 1 | -9.509936 | -1.325415 | -1.862162 |
| 75 | 1 | -8.041620 | -1.469178 | -2.846907 |
| 76 | 1 | -8.479303 | -2.760510 | -1.705114 |
| 77 | 6 | 3.354770  | 3.204842  | -1.224063 |
| 78 | 1 | 3.528328  | 2.452627  | -2.000543 |
| 79 | 1 | 2.522288  | 3.846333  | -1.502859 |
| 80 | 1 | 4.248329  | 3.831175  | -1.137046 |
| 81 | 6 | 4.349326  | 2.050758  | 0.707131  |
| 82 | 1 | 4.945175  | 2.853766  | 1.154391  |
| 83 | 1 | 4.115948  | 1.302257  | 1.459217  |
| 84 | 1 | 4.940560  | 1.567130  | -0.075860 |

29 (E = -1580.0040143 au)

| Center Number | Atomic Number | Coordinates (Angstroms) |           |           |
|---------------|---------------|-------------------------|-----------|-----------|
|               |               | X                       | Y         | Z         |
| 1             | 77            | 0.571522                | 0.672627  | 1.023885  |
| 2             | 6             | 1.306200                | 2.375374  | -0.322466 |
| 3             | 6             | 1.764458                | 2.455965  | 1.062228  |
| 4             | 6             | 0.572239                | 2.653539  | 1.891043  |
| 5             | 6             | -0.575643               | 2.564827  | 1.042864  |
| 6             | 6             | -0.111620               | 2.426036  | -0.331461 |
| 7             | 6             | 2.176301                | 2.388752  | -1.534519 |
| 8             | 9             | 3.448591                | 1.941813  | -1.294181 |
| 9             | 9             | 2.309257                | 3.672401  | -2.034948 |
| 10            | 9             | 1.688570                | 1.630783  | -2.572983 |
| 11            | 6             | 3.176052                | 2.579541  | 1.555559  |
| 12            | 1             | 3.219427                | 2.444195  | 2.637788  |
| 13            | 1             | 3.836462                | 1.849144  | 1.088357  |
| 14            | 1             | 3.553486                | 3.584691  | 1.324444  |
| 15            | 6             | 0.577573                | 2.975646  | 3.355112  |
| 16            | 1             | 0.727911                | 4.055507  | 3.482956  |
| 17            | 1             | -0.369919               | 2.710604  | 3.828885  |
| 18            | 1             | 1.382246                | 2.459011  | 3.883179  |
| 19            | 6             | -2.009502               | 2.778430  | 1.441742  |
| 20            | 1             | -2.687633               | 2.159190  | 0.849174  |
| 21            | 1             | -2.170560               | 2.542960  | 2.495861  |
| 22            | 1             | -2.286935               | 3.828635  | 1.283452  |
| 23            | 6             | -1.044860               | 2.358624  | -1.500884 |
| 24            | 1             | -1.468228               | 3.358034  | -1.668987 |
| 25            | 1             | -0.554696               | 2.031946  | -2.415807 |
| 26            | 1             | -1.882460               | 1.686803  | -1.290072 |
| 27            | 6             | 1.394842                | -2.075400 | 1.675936  |
| 28            | 7             | 1.726289                | -1.103695 | 0.868090  |
| 29            | 6             | 0.571196                | -1.628537 | 2.816016  |
| 30            | 6             | 1.789255                | -3.498467 | 1.433539  |
| 31            | 1             | 1.224813                | -4.169913 | 2.079533  |
| 32            | 1             | 1.623077                | -3.767387 | 0.387266  |
| 33            | 1             | 2.857403                | -3.639717 | 1.641777  |
| 34            | 6             | 0.101742                | -0.359261 | 2.695537  |
| 35            | 1             | -0.505288               | 0.060635  | 3.493321  |
| 36            | 8             | 2.357902                | -1.514218 | -0.328549 |
| 37            | 6             | 3.707619                | -1.206295 | -0.398284 |
| 38            | 8             | 4.286396                | -0.662295 | 0.500940  |
| 39            | 6             | 4.319112                | -1.720901 | -1.706788 |
| 40            | 6             | 3.345839                | -1.583719 | -2.902339 |

|    |   |           |           |           |
|----|---|-----------|-----------|-----------|
| 41 | 1 | 3.059617  | -0.540647 | -3.067111 |
| 42 | 1 | 3.845539  | -1.946189 | -3.806761 |
| 43 | 1 | 2.437605  | -2.174591 | -2.755361 |
| 44 | 6 | 5.617607  | -0.928984 | -1.982303 |
| 45 | 1 | 6.086050  | -1.316573 | -2.892681 |
| 46 | 1 | 5.409583  | 0.135620  | -2.130681 |
| 47 | 1 | 6.328298  | -1.029637 | -1.157174 |
| 48 | 6 | 4.661834  | -3.223607 | -1.479744 |
| 49 | 1 | 5.164730  | -3.609407 | -2.372707 |
| 50 | 1 | 5.334560  | -3.353365 | -0.625019 |
| 51 | 1 | 3.759003  | -3.819699 | -1.313626 |
| 52 | 6 | 0.310858  | -2.508956 | 3.986752  |
| 53 | 6 | 1.361854  | -3.169060 | 4.657180  |
| 54 | 6 | -1.003526 | -2.656794 | 4.475786  |
| 55 | 6 | 1.102965  | -3.951818 | 5.787592  |
| 56 | 1 | 2.383911  | -3.052048 | 4.309796  |
| 57 | 6 | -1.259452 | -3.442449 | 5.605103  |
| 58 | 1 | -1.822551 | -2.167247 | 3.957990  |
| 59 | 6 | -0.207581 | -4.092293 | 6.263489  |
| 60 | 1 | 1.922913  | -4.446962 | 6.297235  |
| 61 | 1 | -2.277137 | -3.551249 | 5.965283  |
| 62 | 1 | -0.406551 | -4.703258 | 7.137598  |

**30** (E = -2043.7587236 au)

| Center Number | Atomic Number | Coordinates (Angstroms) |           |           |
|---------------|---------------|-------------------------|-----------|-----------|
|               |               | X                       | Y         | Z         |
| 1             | 77            | 0.131831                | 0.305159  | 0.740215  |
| 2             | 6             | 1.042749                | 2.172220  | -0.207025 |
| 3             | 6             | 1.502605                | 2.070929  | 1.169605  |
| 4             | 6             | 0.343864                | 2.202716  | 2.003355  |
| 5             | 6             | -0.821297               | 2.345724  | 1.167138  |
| 6             | 6             | -0.375924               | 2.381171  | -0.202258 |
| 7             | 6             | 1.914198                | 2.320333  | -1.408910 |
| 8             | 9             | 3.162752                | 1.780133  | -1.246511 |
| 9             | 9             | 2.113055                | 3.654714  | -1.721436 |
| 10            | 9             | 1.386918                | 1.746828  | -2.542657 |
| 11            | 6             | 2.921401                | 2.045420  | 1.666743  |
| 12            | 1             | 2.953216                | 1.800791  | 2.730158  |
| 13            | 1             | 3.537019                | 1.324775  | 1.130804  |
| 14            | 1             | 3.363737                | 3.041713  | 1.537308  |
| 15            | 6             | 0.349258                | 2.302489  | 3.501738  |
| 16            | 1             | 0.528374                | 3.347480  | 3.786500  |
| 17            | 1             | -0.608712               | 2.002225  | 3.931350  |
| 18            | 1             | 1.133809                | 1.691493  | 3.952801  |
| 19            | 6             | -2.195880               | 2.709593  | 1.659837  |
| 20            | 1             | -2.963310               | 2.550333  | 0.901064  |
| 21            | 1             | -2.475790               | 2.136545  | 2.547250  |
| 22            | 1             | -2.212076               | 3.773311  | 1.930700  |
| 23            | 6             | -1.245795               | 2.740818  | -1.372855 |
| 24            | 1             | -1.292025               | 3.835982  | -1.438879 |
| 25            | 1             | -0.857929               | 2.366211  | -2.319778 |
| 26            | 1             | -2.269801               | 2.383290  | -1.246159 |
| 27            | 6             | 1.573061                | -2.090046 | 1.718062  |
| 28            | 7             | 1.514095                | -1.258825 | 0.705510  |
| 29            | 6             | 0.658436                | -1.729204 | 2.789114  |
| 30            | 6             | 2.427751                | -3.321407 | 1.711885  |
| 31            | 1             | 2.075878                | -4.030114 | 2.461919  |
| 32            | 1             | 2.416281                | -3.800131 | 0.729674  |
| 33            | 1             | 3.467735                | -3.065539 | 1.947118  |
| 34            | 6             | -0.184171               | -0.712024 | 2.463948  |

|    |   |           |           |           |
|----|---|-----------|-----------|-----------|
| 35 | 1 | -0.949674 | -0.398994 | 3.169038  |
| 36 | 8 | 2.189353  | -1.640269 | -0.473806 |
| 37 | 6 | 3.542667  | -1.343167 | -0.534887 |
| 38 | 8 | 4.130636  | -0.841199 | 0.382105  |
| 39 | 6 | 4.136276  | -1.810693 | -1.868784 |
| 40 | 6 | 3.212887  | -1.454105 | -3.060193 |
| 41 | 1 | 3.039437  | -0.375468 | -3.122178 |
| 42 | 1 | 3.695854  | -1.775296 | -3.989001 |
| 43 | 1 | 2.245810  | -1.959098 | -2.986801 |
| 44 | 6 | 5.517181  | -1.140956 | -2.045657 |
| 45 | 1 | 5.965104  | -1.487725 | -2.982365 |
| 46 | 1 | 5.427260  | -0.050633 | -2.091506 |
| 47 | 1 | 6.192690  | -1.395655 | -1.223996 |
| 48 | 6 | 4.308402  | -3.356029 | -1.783943 |
| 49 | 1 | 4.790698  | -3.707605 | -2.701981 |
| 50 | 1 | 4.940644  | -3.641830 | -0.936196 |
| 51 | 1 | 3.342048  | -3.861697 | -1.692445 |
| 52 | 6 | -0.792976 | -0.671283 | -1.023492 |
| 53 | 1 | -1.141461 | 0.125101  | -1.669041 |
| 54 | 1 | -0.067318 | -1.339146 | -1.471094 |
| 55 | 6 | -1.640919 | -1.153301 | -0.014846 |
| 56 | 6 | -1.534860 | -2.601037 | 0.418381  |
| 57 | 1 | -0.517051 | -2.985492 | 0.347079  |
| 58 | 1 | -1.909207 | -2.759634 | 1.432720  |
| 59 | 1 | -2.152910 | -3.202265 | -0.262156 |
| 60 | 6 | -2.982610 | -0.488799 | 0.256859  |
| 61 | 1 | -3.179879 | -0.467718 | 1.334568  |
| 62 | 1 | -2.964298 | 0.545595  | -0.088149 |
| 63 | 6 | -4.140384 | -1.219140 | -0.457422 |
| 64 | 1 | -4.298444 | -2.224119 | -0.051761 |
| 65 | 1 | -3.916118 | -1.347185 | -1.525250 |
| 66 | 6 | -5.449287 | -0.460499 | -0.348649 |
| 67 | 8 | -5.587470 | 0.652449  | 0.143045  |
| 68 | 8 | -6.468845 | -1.172595 | -0.881723 |
| 69 | 6 | -7.809211 | -0.545621 | -0.869268 |
| 70 | 1 | -7.744001 | 0.403123  | -1.408925 |
| 71 | 1 | -8.076633 | -0.340371 | 0.170879  |
| 72 | 6 | -8.765304 | -1.521695 | -1.529769 |
| 73 | 1 | -9.773429 | -1.094072 | -1.540707 |
| 74 | 1 | -8.468906 | -1.725020 | -2.563568 |
| 75 | 1 | -8.801750 | -2.468956 | -0.982696 |
| 76 | 6 | 0.631222  | -2.440372 | 4.099041  |
| 77 | 6 | 1.806803  | -2.602182 | 4.860978  |
| 78 | 6 | -0.584998 | -2.922791 | 4.623138  |
| 79 | 6 | 1.765081  | -3.230675 | 6.110706  |
| 80 | 1 | 2.750631  | -2.219172 | 4.484514  |
| 81 | 6 | -0.624877 | -3.548889 | 5.874679  |
| 82 | 1 | -1.496586 | -2.816748 | 4.043259  |
| 83 | 6 | 0.549715  | -3.706299 | 6.621070  |
| 84 | 1 | 2.678039  | -3.342627 | 6.686426  |
| 85 | 1 | -1.569290 | -3.917597 | 6.261500  |
| 86 | 1 | 0.519149  | -4.194464 | 7.589458  |

**TS30-31** (E = -2043.7207324 au)

| Center Number | Atomic Number | Coordinates (Angstroms) |          |           |
|---------------|---------------|-------------------------|----------|-----------|
|               |               | X                       | Y        | Z         |
| 1             | 77            | 0.237444                | 0.403796 | 0.568231  |
| 2             | 6             | 1.122006                | 2.229854 | -0.238675 |
| 3             | 6             | 1.615392                | 2.173886 | 1.149038  |
| 4             | 6             | 0.490148                | 2.255197 | 1.994573  |

|    |   |           |           |           |
|----|---|-----------|-----------|-----------|
| 5  | 6 | -0.702499 | 2.369892  | 1.167576  |
| 6  | 6 | -0.306778 | 2.434185  | -0.208774 |
| 7  | 6 | 1.986593  | 2.418319  | -1.437218 |
| 8  | 9 | 3.201754  | 1.784936  | -1.337180 |
| 9  | 9 | 2.278197  | 3.759019  | -1.641499 |
| 10 | 9 | 1.416622  | 1.978082  | -2.606649 |
| 11 | 6 | 3.052060  | 2.153233  | 1.588076  |
| 12 | 1 | 3.128038  | 1.952081  | 2.658526  |
| 13 | 1 | 3.638184  | 1.403596  | 1.056899  |
| 14 | 1 | 3.503459  | 3.135734  | 1.396662  |
| 15 | 6 | 0.490893  | 2.286477  | 3.497476  |
| 16 | 1 | 0.448511  | 3.326284  | 3.847379  |
| 17 | 1 | -0.376869 | 1.765387  | 3.910753  |
| 18 | 1 | 1.390199  | 1.827836  | 3.913978  |
| 19 | 6 | -2.079610 | 2.638139  | 1.706615  |
| 20 | 1 | -2.859121 | 2.446097  | 0.967057  |
| 21 | 1 | -2.292413 | 2.036813  | 2.594821  |
| 22 | 1 | -2.152341 | 3.693804  | 2.000255  |
| 23 | 6 | -1.214946 | 2.755356  | -1.363914 |
| 24 | 1 | -1.194541 | 3.837790  | -1.544500 |
| 25 | 1 | -0.909714 | 2.254868  | -2.283052 |
| 26 | 1 | -2.248038 | 2.476718  | -1.144850 |
| 27 | 6 | 1.352046  | -2.186764 | 1.504619  |
| 28 | 7 | 1.469490  | -1.271487 | 0.573438  |
| 29 | 6 | 0.302772  | -1.851412 | 2.459096  |
| 30 | 6 | 2.134007  | -3.468022 | 1.502853  |
| 31 | 1 | 1.747964  | -4.154881 | 2.255549  |
| 32 | 1 | 2.076793  | -3.947957 | 0.521331  |
| 33 | 1 | 3.192534  | -3.278589 | 1.713843  |
| 34 | 6 | -0.650951 | -0.972322 | 1.961805  |
| 35 | 1 | -1.393198 | -0.611048 | 2.662518  |
| 36 | 8 | 2.230068  | -1.655935 | -0.555314 |
| 37 | 6 | 3.579948  | -1.341708 | -0.517527 |
| 38 | 8 | 4.094015  | -0.857882 | 0.452275  |
| 39 | 6 | 4.266204  | -1.763355 | -1.821192 |
| 40 | 6 | 3.420144  | -1.372719 | -3.058846 |
| 41 | 1 | 3.246179  | -0.292998 | -3.097844 |
| 42 | 1 | 3.964222  | -1.663649 | -3.963429 |
| 43 | 1 | 2.452662  | -1.882127 | -3.063354 |
| 44 | 6 | 5.650489  | -1.080492 | -1.883477 |
| 45 | 1 | 6.163621  | -1.396797 | -2.797259 |
| 46 | 1 | 5.555263  | 0.010099  | -1.903699 |
| 47 | 1 | 6.270709  | -1.355682 | -1.025528 |
| 48 | 6 | 4.444205  | -3.309562 | -1.773885 |
| 49 | 1 | 4.987908  | -3.628532 | -2.669172 |
| 50 | 1 | 5.022222  | -3.618209 | -0.895938 |
| 51 | 1 | 3.478123  | -3.823540 | -1.760847 |
| 52 | 6 | -0.991382 | -0.689901 | -0.747071 |
| 53 | 1 | -1.669132 | -0.010945 | -1.257054 |
| 54 | 1 | -0.444072 | -1.312838 | -1.450650 |
| 55 | 6 | -1.578223 | -1.422555 | 0.411539  |
| 56 | 6 | -1.449110 | -2.946789 | 0.298027  |
| 57 | 1 | -0.436363 | -3.257872 | 0.038453  |
| 58 | 1 | -1.759745 | -3.452167 | 1.217088  |
| 59 | 1 | -2.097689 | -3.276085 | -0.523203 |
| 60 | 6 | -2.995920 | -0.963481 | 0.807791  |
| 61 | 1 | -3.276510 | -1.407650 | 1.769233  |
| 62 | 1 | -3.003743 | 0.121336  | 0.937094  |
| 63 | 6 | -4.056636 | -1.348968 | -0.241874 |
| 64 | 1 | -4.229945 | -2.429189 | -0.266906 |
| 65 | 1 | -3.733752 | -1.063478 | -1.252349 |
| 66 | 6 | -5.387499 | -0.666343 | 0.015380  |
| 67 | 8 | -5.566511 | 0.283343  | 0.767354  |

|    |   |           |           |           |
|----|---|-----------|-----------|-----------|
| 68 | 8 | -6.373178 | -1.233231 | -0.717266 |
| 69 | 6 | -7.724781 | -0.641382 | -0.602347 |
| 70 | 1 | -7.660839 | 0.408554  | -0.901059 |
| 71 | 1 | -8.026627 | -0.690022 | 0.447362  |
| 72 | 6 | -8.642409 | -1.444539 | -1.505607 |
| 73 | 1 | -9.657423 | -1.037283 | -1.449354 |
| 74 | 1 | -8.311526 | -1.395434 | -2.547729 |
| 75 | 1 | -8.677798 | -2.494313 | -1.197990 |
| 76 | 6 | 0.299791  | -2.370876 | 3.835355  |
| 77 | 6 | 1.509578  | -2.550864 | 4.545743  |
| 78 | 6 | -0.919734 | -2.654565 | 4.493072  |
| 79 | 6 | 1.496444  | -2.995361 | 5.870097  |
| 80 | 1 | 2.456651  | -2.312770 | 4.072620  |
| 81 | 6 | -0.926088 | -3.109841 | 5.813203  |
| 82 | 1 | -1.858320 | -2.541524 | 3.960840  |
| 83 | 6 | 0.280487  | -3.279858 | 6.506460  |
| 84 | 1 | 2.432021  | -3.115844 | 6.405304  |
| 85 | 1 | -1.868980 | -3.336295 | 6.298959  |
| 86 | 1 | 0.273096  | -3.631593 | 7.532386  |

**31** (E = -2043.7485758 au)

| Center Number | Atomic Number | Coordinates (Angstroms) |           |           |
|---------------|---------------|-------------------------|-----------|-----------|
|               |               | X                       | Y         | Z         |
| 1             | 77            | 0.178730                | 0.201452  | 0.942947  |
| 2             | 6             | 0.703143                | 2.126554  | 0.107690  |
| 3             | 6             | 1.679973                | 2.036381  | 1.203929  |
| 4             | 6             | 0.955749                | 1.978557  | 2.407034  |
| 5             | 6             | -0.465518               | 2.035573  | 2.089455  |
| 6             | 6             | -0.625848               | 2.250095  | 0.682885  |
| 7             | 6             | 1.056448                | 2.453147  | -1.304152 |
| 8             | 9             | 2.208311                | 1.837153  | -1.730850 |
| 9             | 9             | 1.270398                | 3.812194  | -1.472178 |
| 10            | 9             | 0.080154                | 2.111340  | -2.207043 |
| 11            | 6             | 3.175652                | 2.080093  | 1.065350  |
| 12            | 1             | 3.665476                | 1.795381  | 1.998018  |
| 13            | 1             | 3.537775                | 1.421658  | 0.275637  |
| 14            | 1             | 3.488558                | 3.102652  | 0.816514  |
| 15            | 6             | 1.507210                | 1.946615  | 3.802460  |
| 16            | 1             | 1.419829                | 2.943101  | 4.255593  |
| 17            | 1             | 0.957603                | 1.246755  | 4.437261  |
| 18            | 1             | 2.560478                | 1.660455  | 3.820044  |
| 19            | 6             | -1.554623               | 2.118419  | 3.122866  |
| 20            | 1             | -2.535685               | 1.884855  | 2.704580  |
| 21            | 1             | -1.367088               | 1.439217  | 3.958663  |
| 22            | 1             | -1.594570               | 3.138701  | 3.526388  |
| 23            | 6             | -1.896087               | 2.670367  | -0.003306 |
| 24            | 1             | -1.917513               | 3.766023  | -0.069142 |
| 25            | 1             | -1.977378               | 2.275688  | -1.016188 |
| 26            | 1             | -2.774597               | 2.354883  | 0.563146  |
| 27            | 6             | 1.068455                | -2.380158 | 1.338448  |
| 28            | 7             | 1.352448                | -1.490484 | 0.460411  |
| 29            | 6             | 0.083155                | -1.712460 | 2.259481  |
| 30            | 6             | 1.601678                | -3.767520 | 1.459824  |
| 31            | 1             | 0.848509                | -4.423292 | 1.903414  |
| 32            | 1             | 1.904719                | -4.158562 | 0.486111  |
| 33            | 1             | 2.477767                | -3.774526 | 2.119571  |
| 34            | 6             | -1.194669               | -1.354095 | 1.778462  |
| 35            | 1             | -1.851043               | -0.941072 | 2.537275  |
| 36            | 8             | 2.146960                | -1.826384 | -0.642300 |
| 37            | 6             | 3.519511                | -1.657947 | -0.447652 |

|    |   |           |           |           |
|----|---|-----------|-----------|-----------|
| 38 | 8 | 3.965479  | -1.314632 | 0.609662  |
| 39 | 6 | 4.282973  | -2.005966 | -1.726389 |
| 40 | 6 | 3.744189  | -1.163909 | -2.913190 |
| 41 | 1 | 3.845043  | -0.091099 | -2.718263 |
| 42 | 1 | 4.326757  | -1.403897 | -3.808567 |
| 43 | 1 | 2.692944  | -1.383908 | -3.118449 |
| 44 | 6 | 5.779572  | -1.705405 | -1.495533 |
| 45 | 1 | 6.338464  | -1.962073 | -2.400974 |
| 46 | 1 | 5.944843  | -0.645265 | -1.278446 |
| 47 | 1 | 6.181216  | -2.292666 | -0.664099 |
| 48 | 6 | 4.085938  | -3.520638 | -2.019537 |
| 49 | 1 | 4.667069  | -3.785035 | -2.908934 |
| 50 | 1 | 4.441486  | -4.137108 | -1.186312 |
| 51 | 1 | 3.036121  | -3.759314 | -2.213264 |
| 52 | 6 | -1.128745 | -0.710405 | -0.474920 |
| 53 | 1 | -1.774687 | 0.046372  | -0.914468 |
| 54 | 1 | -0.544722 | -1.186788 | -1.262517 |
| 55 | 6 | -1.880516 | -1.700714 | 0.439665  |
| 56 | 6 | -1.742478 | -3.179781 | 0.027414  |
| 57 | 1 | -0.698959 | -3.483521 | -0.087041 |
| 58 | 1 | -2.215653 | -3.836501 | 0.767638  |
| 59 | 1 | -2.225985 | -3.346299 | -0.940996 |
| 60 | 6 | -3.379180 | -1.322729 | 0.595519  |
| 61 | 1 | -3.809059 | -1.925204 | 1.408031  |
| 62 | 1 | -3.443132 | -0.274928 | 0.912308  |
| 63 | 6 | -4.218384 | -1.509406 | -0.675811 |
| 64 | 1 | -4.365651 | -2.567300 | -0.915453 |
| 65 | 1 | -3.712204 | -1.066741 | -1.546099 |
| 66 | 6 | -5.585612 | -0.860486 | -0.579698 |
| 67 | 8 | -5.929257 | -0.037448 | 0.260168  |
| 68 | 8 | -6.402237 | -1.293756 | -1.570082 |
| 69 | 6 | -7.759623 | -0.710388 | -1.629588 |
| 70 | 1 | -7.658915 | 0.372336  | -1.745685 |
| 71 | 1 | -8.259161 | -0.915872 | -0.678888 |
| 72 | 6 | -8.471300 | -1.353173 | -2.806079 |
| 73 | 1 | -9.484956 | -0.946547 | -2.886609 |
| 74 | 1 | -7.945467 | -1.149015 | -3.744060 |
| 75 | 1 | -8.547212 | -2.437270 | -2.675801 |
| 76 | 6 | 0.443558  | -1.690466 | 3.706269  |
| 77 | 6 | 1.793287  | -1.562679 | 4.099831  |
| 78 | 6 | -0.541604 | -1.847259 | 4.703242  |
| 79 | 6 | 2.145310  | -1.584643 | 5.451897  |
| 80 | 1 | 2.565758  | -1.425029 | 3.349010  |
| 81 | 6 | -0.185105 | -1.862351 | 6.056295  |
| 82 | 1 | -1.580795 | -1.985309 | 4.425608  |
| 83 | 6 | 1.156855  | -1.731630 | 6.434832  |
| 84 | 1 | 3.186713  | -1.483135 | 5.737522  |
| 85 | 1 | -0.953808 | -1.990157 | 6.810709  |
| 86 | 1 | 1.430963  | -1.750481 | 7.484004  |

**32** (E = -1917.031809 au)

| Center Number | Atomic Number | Coordinates (Angstroms) |          |           |
|---------------|---------------|-------------------------|----------|-----------|
|               |               | X                       | Y        | Z         |
| 1             | 77            | 0.567464                | 0.694269 | 0.984186  |
| 2             | 6             | 1.302412                | 2.384845 | -0.377414 |
| 3             | 6             | 1.769625                | 2.472276 | 1.004138  |
| 4             | 6             | 0.583315                | 2.682811 | 1.837954  |
| 5             | 6             | -0.570445               | 2.596356 | 0.997114  |
| 6             | 6             | -0.115277               | 2.445911 | -0.378192 |
| 7             | 6             | 2.166345                | 2.383167 | -1.594445 |

|    |   |           |           |           |
|----|---|-----------|-----------|-----------|
| 8  | 9 | 3.434602  | 1.922906  | -1.358289 |
| 9  | 9 | 2.310736  | 3.662855  | -2.100738 |
| 10 | 9 | 1.664523  | 1.625741  | -2.626254 |
| 11 | 6 | 3.184638  | 2.592783  | 1.487810  |
| 12 | 1 | 3.234830  | 2.461367  | 2.570185  |
| 13 | 1 | 3.839939  | 1.859022  | 1.018827  |
| 14 | 1 | 3.563061  | 3.596071  | 1.250315  |
| 15 | 6 | 0.599031  | 3.017223  | 3.298960  |
| 16 | 1 | 0.755889  | 4.097460  | 3.415451  |
| 17 | 1 | -0.347221 | 2.762412  | 3.780663  |
| 18 | 1 | 1.404424  | 2.501808  | 3.827054  |
| 19 | 6 | -1.999795 | 2.826654  | 1.402754  |
| 20 | 1 | -2.688033 | 2.214248  | 0.814949  |
| 21 | 1 | -2.158486 | 2.595945  | 2.458268  |
| 22 | 1 | -2.265608 | 3.879685  | 1.243234  |
| 23 | 6 | -1.056222 | 2.374106  | -1.540955 |
| 24 | 1 | -1.481867 | 3.372605  | -1.708554 |
| 25 | 1 | -0.572316 | 2.045368  | -2.458366 |
| 26 | 1 | -1.891846 | 1.702192  | -1.322204 |
| 27 | 6 | 1.458356  | -2.019765 | 1.715110  |
| 28 | 7 | 1.740292  | -1.071030 | 0.862748  |
| 29 | 6 | 0.636852  | -1.553241 | 2.845403  |
| 30 | 6 | 1.895674  | -3.437710 | 1.518530  |
| 31 | 1 | 1.383484  | -4.102454 | 2.213120  |
| 32 | 1 | 1.694279  | -3.757351 | 0.492626  |
| 33 | 1 | 2.976274  | -3.532403 | 1.683936  |
| 34 | 6 | 0.118541  | -0.308085 | 2.680041  |
| 35 | 1 | -0.497720 | 0.119455  | 3.466609  |
| 36 | 8 | 2.353551  | -1.507098 | -0.333373 |
| 37 | 6 | 3.704267  | -1.207072 | -0.430780 |
| 38 | 8 | 4.299925  | -0.652966 | 0.450772  |
| 39 | 6 | 4.288932  | -1.744162 | -1.742342 |
| 40 | 6 | 3.297987  | -1.607456 | -2.923545 |
| 41 | 1 | 3.022721  | -0.562577 | -3.095465 |
| 42 | 1 | 3.778303  | -1.986395 | -3.831683 |
| 43 | 1 | 2.384810  | -2.184894 | -2.755348 |
| 44 | 6 | 5.592217  | -0.971272 | -2.047065 |
| 45 | 1 | 6.040184  | -1.373370 | -2.961415 |
| 46 | 1 | 5.395040  | 0.094436  | -2.202115 |
| 47 | 1 | 6.315547  | -1.073327 | -1.233176 |
| 48 | 6 | 4.616947  | -3.248519 | -1.504847 |
| 49 | 1 | 5.100477  | -3.649493 | -2.401782 |
| 50 | 1 | 5.302083  | -3.377693 | -0.659948 |
| 51 | 1 | 3.710007  | -3.831990 | -1.317919 |
| 52 | 6 | 0.432237  | -2.382523 | 4.063362  |
| 53 | 6 | 1.519140  | -2.985636 | 4.729811  |
| 54 | 6 | -0.861260 | -2.538146 | 4.600220  |
| 55 | 6 | 1.319492  | -3.721484 | 5.898214  |
| 56 | 1 | 2.526771  | -2.862907 | 4.347870  |
| 57 | 6 | -1.067194 | -3.272785 | 5.769746  |
| 58 | 1 | -1.709526 | -2.095739 | 4.089747  |
| 59 | 6 | 0.023898  | -3.869765 | 6.415068  |
| 60 | 1 | 2.165788  | -4.175090 | 6.400889  |
| 61 | 1 | -2.069006 | -3.388285 | 6.165355  |
| 62 | 6 | -0.175831 | -4.629712 | 7.690657  |
| 63 | 9 | -1.458627 | -5.096024 | 7.847750  |
| 64 | 9 | 0.084228  | -3.854952 | 8.812000  |
| 65 | 9 | 0.656719  | -5.722208 | 7.798401  |

33 (E = -2380.7868907 au)

| Center Number | Atomic | Coordinates (Angstroms) |  |  |
|---------------|--------|-------------------------|--|--|
|---------------|--------|-------------------------|--|--|

|    | Number | X         | Y         | Z         |
|----|--------|-----------|-----------|-----------|
| 1  | 77     | 0.136473  | 0.319569  | 0.730180  |
| 2  | 6      | 1.051727  | 2.175378  | -0.234411 |
| 3  | 6      | 1.509926  | 2.082644  | 1.143777  |
| 4  | 6      | 0.350221  | 2.226069  | 1.975171  |
| 5  | 6      | -0.813151 | 2.365975  | 1.136197  |
| 6  | 6      | -0.365436 | 2.389675  | -0.233093 |
| 7  | 6      | 1.924827  | 2.311183  | -1.437105 |
| 8  | 9      | 3.172333  | 1.771105  | -1.268134 |
| 9  | 9      | 2.124819  | 3.642187  | -1.761089 |
| 10 | 9      | 1.397559  | 1.727459  | -2.565369 |
| 11 | 6      | 2.928016  | 2.057288  | 1.642666  |
| 12 | 1      | 2.958231  | 1.819375  | 2.707634  |
| 13 | 1      | 3.542851  | 1.332268  | 1.111777  |
| 14 | 1      | 3.372231  | 3.051955  | 1.507415  |
| 15 | 6      | 0.354136  | 2.338634  | 3.472627  |
| 16 | 1      | 0.535647  | 3.385688  | 3.748089  |
| 17 | 1      | -0.605073 | 2.044997  | 3.904035  |
| 18 | 1      | 1.137033  | 1.730133  | 3.929940  |
| 19 | 6      | -2.186881 | 2.740387  | 1.623147  |
| 20 | 1      | -2.952046 | 2.586688  | 0.860955  |
| 21 | 1      | -2.475427 | 2.170799  | 2.510019  |
| 22 | 1      | -2.195720 | 3.804533  | 1.892548  |
| 23 | 6      | -1.233350 | 2.740940  | -1.407420 |
| 24 | 1      | -1.281722 | 3.835673  | -1.478951 |
| 25 | 1      | -0.842539 | 2.362337  | -2.351498 |
| 26 | 1      | -2.257007 | 2.382161  | -1.281030 |
| 27 | 6      | 1.573143  | -2.077007 | 1.713916  |
| 28 | 7      | 1.514319  | -1.249924 | 0.698440  |
| 29 | 6      | 0.660512  | -1.706183 | 2.783055  |
| 30 | 6      | 2.421636  | -3.312943 | 1.708964  |
| 31 | 1      | 2.073157  | -4.018981 | 2.463097  |
| 32 | 1      | 2.398524  | -3.796096 | 0.729106  |
| 33 | 1      | 3.465370  | -3.061893 | 1.932274  |
| 34 | 6      | -0.181420 | -0.687930 | 2.455441  |
| 35 | 1      | -0.941662 | -0.367961 | 3.163103  |
| 36 | 8      | 2.186189  | -1.638642 | -0.479301 |
| 37 | 6      | 3.541803  | -1.345810 | -0.542279 |
| 38 | 8      | 4.130080  | -0.840999 | 0.372564  |
| 39 | 6      | 4.133863  | -1.823098 | -1.873036 |
| 40 | 6      | 3.210122  | -1.475235 | -3.066704 |
| 41 | 1      | 3.037048  | -0.397076 | -3.136954 |
| 42 | 1      | 3.692852  | -1.803669 | -3.993064 |
| 43 | 1      | 2.242947  | -1.979452 | -2.989396 |
| 44 | 6      | 5.515115  | -1.155415 | -2.055345 |
| 45 | 1      | 5.962405  | -1.509467 | -2.989593 |
| 46 | 1      | 5.425772  | -0.065436 | -2.109404 |
| 47 | 1      | 6.190816  | -1.404392 | -1.232106 |
| 48 | 6      | 4.305109  | -3.367954 | -1.776294 |
| 49 | 1      | 4.786696  | -3.726607 | -2.691925 |
| 50 | 1      | 4.937663  | -3.647759 | -0.926813 |
| 51 | 1      | 3.338501  | -3.872373 | -1.680651 |
| 52 | 6      | -0.799982 | -0.669768 | -1.025046 |
| 53 | 1      | -1.146795 | 0.124550  | -1.673970 |
| 54 | 1      | -0.075267 | -1.340921 | -1.469219 |
| 55 | 6      | -1.649844 | -1.146079 | -0.016440 |
| 56 | 6      | -1.544253 | -2.590145 | 0.427617  |
| 57 | 1      | -0.526729 | -2.975949 | 0.360249  |
| 58 | 1      | -1.921385 | -2.741612 | 1.442044  |
| 59 | 1      | -2.161385 | -3.195767 | -0.249845 |
| 60 | 6      | -2.988583 | -0.476330 | 0.255031  |
| 61 | 1      | -3.184572 | -0.450221 | 1.332769  |

|    |   |           |           |           |
|----|---|-----------|-----------|-----------|
| 62 | 1 | -2.968328 | 0.556524  | -0.094549 |
| 63 | 6 | -4.148265 | -1.208416 | -0.454606 |
| 64 | 1 | -4.303540 | -2.213129 | -0.047004 |
| 65 | 1 | -3.928059 | -1.337492 | -1.523002 |
| 66 | 6 | -5.457956 | -0.451842 | -0.340466 |
| 67 | 8 | -5.598420 | 0.654333  | 0.165515  |
| 68 | 8 | -6.474908 | -1.158251 | -0.885503 |
| 69 | 6 | -7.816760 | -0.534401 | -0.867039 |
| 70 | 1 | -7.752482 | 0.421917  | -1.393229 |
| 71 | 1 | -8.086712 | -0.344418 | 0.175351  |
| 72 | 6 | -8.769205 | -1.503286 | -1.543184 |
| 73 | 1 | -9.778260 | -1.077798 | -1.550312 |
| 74 | 1 | -8.470152 | -1.691441 | -2.579088 |
| 75 | 1 | -8.804682 | -2.458188 | -1.009500 |
| 76 | 6 | 0.638035  | -2.398679 | 4.101232  |
| 77 | 6 | 1.822207  | -2.583662 | 4.845031  |
| 78 | 6 | -0.580461 | -2.840461 | 4.653329  |
| 79 | 6 | 1.789922  | -3.193343 | 6.099416  |
| 80 | 1 | 2.769911  | -2.232580 | 4.451416  |
| 81 | 6 | -0.620474 | -3.447351 | 5.910744  |
| 82 | 1 | -1.499716 | -2.721081 | 4.090738  |
| 83 | 6 | 0.567065  | -3.629655 | 6.631145  |
| 84 | 1 | 2.709114  | -3.325396 | 6.658546  |
| 85 | 1 | -1.566048 | -3.785151 | 6.317219  |
| 86 | 6 | 0.540468  | -4.245812 | 7.995911  |
| 87 | 9 | -0.592988 | -4.983382 | 8.236695  |
| 88 | 9 | 0.595002  | -3.295356 | 9.005684  |
| 89 | 9 | 1.611467  | -5.083473 | 8.225124  |

**TS33-34** (E = -2380.7466804 au)

| Center Number | Atomic Number | Coordinates (Angstroms) |           |           |
|---------------|---------------|-------------------------|-----------|-----------|
|               |               | X                       | Y         | Z         |
| 1             | 77            | 0.229261                | 0.383526  | 0.563386  |
| 2             | 6             | 1.146109                | 2.211463  | -0.165658 |
| 3             | 6             | 1.618860                | 2.132517  | 1.230300  |
| 4             | 6             | 0.481621                | 2.201280  | 2.055357  |
| 5             | 6             | -0.698668               | 2.339082  | 1.209964  |
| 6             | 6             | -0.281653               | 2.433964  | -0.157427 |
| 7             | 6             | 2.033030                | 2.420228  | -1.346839 |
| 8             | 9             | 3.240063                | 1.774353  | -1.241687 |
| 9             | 9             | 2.336281                | 3.762531  | -1.511083 |
| 10            | 9             | 1.477371                | 2.012130  | -2.533941 |
| 11            | 6             | 3.049247                | 2.083089  | 1.686446  |
| 12            | 1             | 3.108349                | 1.883038  | 2.758105  |
| 13            | 1             | 3.624236                | 1.318998  | 1.162783  |
| 14            | 1             | 3.525446                | 3.054189  | 1.497994  |
| 15            | 6             | 0.451830                | 2.193559  | 3.557957  |
| 16            | 1             | 0.360232                | 3.221610  | 3.931920  |
| 17            | 1             | -0.402109               | 1.628277  | 3.941424  |
| 18            | 1             | 1.360672                | 1.760950  | 3.981057  |
| 19            | 6             | -2.081767               | 2.606424  | 1.732687  |
| 20            | 1             | -2.850761               | 2.431059  | 0.978111  |
| 21            | 1             | -2.311367               | 1.994167  | 2.609002  |
| 22            | 1             | -2.151877               | 3.658144  | 2.040876  |
| 23            | 6             | -1.166110               | 2.793137  | -1.319553 |
| 24            | 1             | -1.131065               | 3.879232  | -1.473599 |
| 25            | 1             | -0.850414               | 2.310725  | -2.244723 |
| 26            | 1             | -2.205540               | 2.520486  | -1.124438 |
| 27            | 6             | 1.336489                | -2.224973 | 1.468473  |
| 28            | 7             | 1.454805                | -1.307251 | 0.541491  |

|    |   |           |           |           |
|----|---|-----------|-----------|-----------|
| 29 | 6 | 0.293854  | -1.885662 | 2.429117  |
| 30 | 6 | 2.109963  | -3.511186 | 1.460531  |
| 31 | 1 | 1.745568  | -4.186060 | 2.234630  |
| 32 | 1 | 2.013744  | -4.005143 | 0.488686  |
| 33 | 1 | 3.176495  | -3.326556 | 1.629954  |
| 34 | 6 | -0.675624 | -1.023064 | 1.939630  |
| 35 | 1 | -1.410128 | -0.661150 | 2.648038  |
| 36 | 8 | 2.205635  | -1.691332 | -0.591975 |
| 37 | 6 | 3.557521  | -1.375926 | -0.561036 |
| 38 | 8 | 4.075537  | -0.897743 | 0.408960  |
| 39 | 6 | 4.233213  | -1.786835 | -1.873028 |
| 40 | 6 | 3.401038  | -1.331175 | -3.098440 |
| 41 | 1 | 3.264885  | -0.245300 | -3.106102 |
| 42 | 1 | 3.934754  | -1.614614 | -4.011518 |
| 43 | 1 | 2.416530  | -1.806584 | -3.116385 |
| 44 | 6 | 5.639191  | -1.148738 | -1.914777 |
| 45 | 1 | 6.143131  | -1.455774 | -2.836760 |
| 46 | 1 | 5.580478  | -0.055518 | -1.903532 |
| 47 | 1 | 6.248613  | -1.468954 | -1.064612 |
| 48 | 6 | 4.359208  | -3.338589 | -1.871266 |
| 49 | 1 | 4.891478  | -3.649009 | -2.776327 |
| 50 | 1 | 4.927568  | -3.691699 | -1.003781 |
| 51 | 1 | 3.376664  | -3.820307 | -1.871328 |
| 52 | 6 | -1.007564 | -0.664868 | -0.765041 |
| 53 | 1 | -1.693878 | 0.022318  | -1.252047 |
| 54 | 1 | -0.475139 | -1.277800 | -1.488537 |
| 55 | 6 | -1.580918 | -1.422621 | 0.392401  |
| 56 | 6 | -1.444540 | -2.943915 | 0.231361  |
| 57 | 1 | -0.428421 | -3.244128 | -0.026663 |
| 58 | 1 | -1.764016 | -3.478416 | 1.130479  |
| 59 | 1 | -2.081736 | -3.248091 | -0.607646 |
| 60 | 6 | -3.006241 | -0.987214 | 0.797033  |
| 61 | 1 | -3.284546 | -1.466289 | 1.742280  |
| 62 | 1 | -3.023079 | 0.092619  | 0.964052  |
| 63 | 6 | -4.063046 | -1.346050 | -0.264544 |
| 64 | 1 | -4.199127 | -2.428927 | -0.351679 |
| 65 | 1 | -3.764403 | -0.991195 | -1.259792 |
| 66 | 6 | -5.415182 | -0.732703 | 0.050243  |
| 67 | 8 | -5.633811 | 0.099162  | 0.921719  |
| 68 | 8 | -6.370869 | -1.217224 | -0.775193 |
| 69 | 6 | -7.741338 | -0.684331 | -0.606766 |
| 70 | 1 | -7.704169 | 0.397934  | -0.758489 |
| 71 | 1 | -8.057784 | -0.884254 | 0.420494  |
| 72 | 6 | -8.620455 | -1.381492 | -1.628548 |
| 73 | 1 | -9.647742 | -1.013125 | -1.537634 |
| 74 | 1 | -8.274692 | -1.182067 | -2.647661 |
| 75 | 1 | -8.629915 | -2.463940 | -1.466941 |
| 76 | 6 | 0.328011  | -2.367597 | 3.821626  |
| 77 | 6 | 1.557372  | -2.521396 | 4.502508  |
| 78 | 6 | -0.868871 | -2.640906 | 4.519071  |
| 79 | 6 | 1.587847  | -2.932447 | 5.833598  |
| 80 | 1 | 2.490624  | -2.293478 | 4.000320  |
| 81 | 6 | -0.841541 | -3.057997 | 5.849907  |
| 82 | 1 | -1.823639 | -2.548941 | 4.014905  |
| 83 | 6 | 0.387455  | -3.206386 | 6.506075  |
| 84 | 1 | 2.538585  | -3.037641 | 6.343158  |
| 85 | 1 | -1.768651 | -3.274096 | 6.365968  |
| 86 | 6 | 0.439884  | -3.619058 | 7.946994  |
| 87 | 9 | -0.737449 | -4.157252 | 8.399991  |
| 88 | 9 | 0.723132  | -2.552860 | 8.785259  |
| 89 | 9 | 1.423182  | -4.553058 | 8.194652  |

34 (E = -2380.7745303 au)

| Center Number | Atomic Number | Coordinates (Angstroms) |           |           |
|---------------|---------------|-------------------------|-----------|-----------|
|               |               | X                       | Y         | Z         |
| 1             | 77            | 0.148957                | 0.110207  | 0.997316  |
| 2             | 6             | 0.667962                | 2.064678  | 0.232336  |
| 3             | 6             | 1.665837                | 1.922474  | 1.302154  |
| 4             | 6             | 0.966426                | 1.822106  | 2.518305  |
| 5             | 6             | -0.459319               | 1.903299  | 2.234363  |
| 6             | 6             | -0.648321               | 2.171898  | 0.840116  |
| 7             | 6             | 0.993024                | 2.448236  | -1.173068 |
| 8             | 9             | 2.126953                | 1.839991  | -1.653594 |
| 9             | 9             | 1.217002                | 3.810591  | -1.285055 |
| 10            | 9             | -0.007920               | 2.155155  | -2.065688 |
| 11            | 6             | 3.158643                | 1.959916  | 1.137786  |
| 12            | 1             | 3.663132                | 1.588424  | 2.031205  |
| 13            | 1             | 3.496861                | 1.372587  | 0.284281  |
| 14            | 1             | 3.478766                | 2.997613  | 0.975171  |
| 15            | 6             | 1.553824                | 1.742506  | 3.897242  |
| 16            | 1             | 1.535768                | 2.737692  | 4.361363  |
| 17            | 1             | 0.983292                | 1.070211  | 4.542699  |
| 18            | 1             | 2.590058                | 1.399129  | 3.882882  |
| 19            | 6             | -1.527012               | 1.956655  | 3.291127  |
| 20            | 1             | -2.515155               | 1.727439  | 2.887852  |
| 21            | 1             | -1.319377               | 1.261982  | 4.108832  |
| 22            | 1             | -1.563319               | 2.968296  | 3.716297  |
| 23            | 6             | -1.930087               | 2.632848  | 0.202950  |
| 24            | 1             | -1.949444               | 3.730528  | 0.202357  |
| 25            | 1             | -2.031303               | 2.299182  | -0.829720 |
| 26            | 1             | -2.798710               | 2.285955  | 0.766252  |
| 27            | 6             | 0.997770                | -2.495660 | 1.275577  |
| 28            | 7             | 1.310175                | -1.571440 | 0.444237  |
| 29            | 6             | 0.007835                | -1.847675 | 2.207453  |
| 30            | 6             | 1.501880                | -3.896788 | 1.345489  |
| 31            | 1             | 0.707337                | -4.565392 | 1.687433  |
| 32            | 1             | 1.872908                | -4.231861 | 0.374831  |
| 33            | 1             | 2.322996                | -3.963331 | 2.069451  |
| 34            | 6             | -1.263765               | -1.460302 | 1.729122  |
| 35            | 1             | -1.927818               | -1.075192 | 2.496314  |
| 36            | 8             | 2.121713                | -1.862374 | -0.656103 |
| 37            | 6             | 3.494853                | -1.744010 | -0.417082 |
| 38            | 8             | 3.919625                | -1.481260 | 0.671116  |
| 39            | 6             | 4.280580                | -2.019067 | -1.699744 |
| 40            | 6             | 3.867594                | -0.994478 | -2.790974 |
| 41            | 1             | 4.069504                | 0.032492  | -2.469001 |
| 42            | 1             | 4.453323                | -1.188784 | -3.695364 |
| 43            | 1             | 2.807071                | -1.080463 | -3.043136 |
| 44            | 6             | 5.785789                | -1.881719 | -1.385248 |
| 45            | 1             | 6.359801                | -2.079852 | -2.295909 |
| 46            | 1             | 6.029842                | -0.873034 | -1.037287 |
| 47            | 1             | 6.100629                | -2.595384 | -0.617509 |
| 48            | 6             | 3.966708                | -3.462186 | -2.184272 |
| 49            | 1             | 4.566927                | -3.672055 | -3.075435 |
| 50            | 1             | 4.223770                | -4.204276 | -1.420142 |
| 51            | 1             | 2.911504                | -3.577632 | -2.447568 |
| 52            | 6             | -1.152077               | -0.710860 | -0.483939 |
| 53            | 1             | -1.780951               | 0.078476  | -0.888266 |
| 54            | 1             | -0.560867               | -1.150003 | -1.287301 |
| 55            | 6             | -1.929186               | -1.738630 | 0.365156  |
| 56            | 6             | -1.791114               | -3.196397 | -0.116815 |
| 57            | 1             | -0.747658               | -3.498182 | -0.236414 |
| 58            | 1             | -2.274911               | -3.886892 | 0.584649  |
| 59            | 1             | -2.264500               | -3.313003 | -1.097350 |

|    |   |           |           |           |
|----|---|-----------|-----------|-----------|
| 60 | 6 | -3.428001 | -1.358299 | 0.512511  |
| 61 | 1 | -3.876680 | -1.999223 | 1.284317  |
| 62 | 1 | -3.491426 | -0.328194 | 0.882742  |
| 63 | 6 | -4.244660 | -1.471693 | -0.781866 |
| 64 | 1 | -4.390154 | -2.514341 | -1.082203 |
| 65 | 1 | -3.723067 | -0.983354 | -1.617793 |
| 66 | 6 | -5.612547 | -0.825929 | -0.672721 |
| 67 | 8 | -5.975096 | -0.064741 | 0.216043  |
| 68 | 8 | -6.405120 | -1.183943 | -1.711265 |
| 69 | 6 | -7.760593 | -0.594996 | -1.760422 |
| 70 | 1 | -7.657269 | 0.493422  | -1.782516 |
| 71 | 1 | -8.286698 | -0.878559 | -0.844727 |
| 72 | 6 | -8.438102 | -1.135918 | -3.006267 |
| 73 | 1 | -9.449659 | -0.722957 | -3.080731 |
| 74 | 1 | -7.886407 | -0.854017 | -3.908582 |
| 75 | 1 | -8.516179 | -2.227047 | -2.969881 |
| 76 | 6 | 0.344434  | -1.898308 | 3.661430  |
| 77 | 6 | 1.685562  | -1.780257 | 4.083588  |
| 78 | 6 | -0.653866 | -2.122485 | 4.629543  |
| 79 | 6 | 2.019287  | -1.878888 | 5.433307  |
| 80 | 1 | 2.470320  | -1.594104 | 3.357664  |
| 81 | 6 | -0.324652 | -2.214314 | 5.984246  |
| 82 | 1 | -1.686623 | -2.254709 | 4.329928  |
| 83 | 6 | 1.011915  | -2.098068 | 6.384853  |
| 84 | 1 | 3.054407  | -1.787434 | 5.740474  |
| 85 | 1 | -1.103504 | -2.394624 | 6.714901  |
| 86 | 6 | 1.375962  | -2.164997 | 7.838309  |
| 87 | 9 | 0.437046  | -2.814678 | 8.600358  |
| 88 | 9 | 1.517370  | -0.905838 | 8.400121  |
| 89 | 9 | 2.575391  | -2.804615 | 8.056888  |

35 (E = -1633.5270491 au)

| Center Number | Atomic Number | Coordinates (Angstroms) |           |           |
|---------------|---------------|-------------------------|-----------|-----------|
|               |               | X                       | Y         | Z         |
| 1             | 77            | -0.910487               | 0.388264  | 0.306804  |
| 2             | 6             | -1.177574               | -1.681469 | -0.381640 |
| 3             | 6             | -1.301406               | -0.797263 | -1.539064 |
| 4             | 6             | -2.422348               | 0.054641  | -1.295437 |
| 5             | 6             | -2.993449               | -0.286249 | 0.000157  |
| 6             | 6             | -2.251498               | -1.389223 | 0.538094  |
| 7             | 6             | -0.259688               | -2.853812 | -0.282704 |
| 8             | 9             | 0.898475                | -2.695293 | -1.002106 |
| 9             | 9             | -0.860058               | -4.000287 | -0.776681 |
| 10            | 9             | 0.119366                | -3.150438 | 1.002306  |
| 11            | 6             | -0.520638               | -0.856465 | -2.822271 |
| 12            | 1             | -0.683585               | 0.045253  | -3.415627 |
| 13            | 1             | 0.549552                | -0.967605 | -2.654469 |
| 14            | 1             | -0.867221               | -1.714603 | -3.412666 |
| 15            | 6             | -3.008232               | 1.041318  | -2.263909 |
| 16            | 1             | -3.738328               | 0.527993  | -2.903238 |
| 17            | 1             | -3.534760               | 1.847892  | -1.748229 |
| 18            | 1             | -2.249805               | 1.483571  | -2.913839 |
| 19            | 6             | -4.256396               | 0.284593  | 0.581121  |
| 20            | 1             | -4.218626               | 0.299052  | 1.671742  |
| 21            | 1             | -4.430378               | 1.306741  | 0.235904  |
| 22            | 1             | -5.113809               | -0.325187 | 0.267944  |
| 23            | 6             | -2.583255               | -2.113362 | 1.809829  |
| 24            | 1             | -3.142977               | -1.467939 | 2.487207  |
| 25            | 1             | -3.205914               | -2.984360 | 1.566078  |
| 26            | 1             | -1.691531               | -2.469125 | 2.325558  |

|    |   |           |           |           |
|----|---|-----------|-----------|-----------|
| 27 | 8 | -0.193967 | 0.420844  | 2.302354  |
| 28 | 6 | -0.954883 | 0.624627  | 3.341274  |
| 29 | 8 | -2.159173 | 0.873229  | 3.307973  |
| 30 | 6 | -0.210724 | 0.503909  | 4.666735  |
| 31 | 1 | -0.606173 | 1.229783  | 5.382755  |
| 32 | 1 | -0.382482 | -0.499869 | 5.075285  |
| 33 | 1 | 0.865141  | 0.645319  | 4.543306  |
| 34 | 6 | 1.116004  | 2.436482  | -0.304275 |
| 35 | 7 | 1.046270  | 1.198096  | 0.029970  |
| 36 | 6 | -0.276791 | 2.968955  | -0.429426 |
| 37 | 6 | 2.340773  | 3.267038  | -0.499047 |
| 38 | 1 | 2.136209  | 4.312744  | -0.257616 |
| 39 | 1 | 3.155556  | 2.903125  | 0.129544  |
| 40 | 1 | 2.672292  | 3.215481  | -1.544334 |
| 41 | 6 | -1.185365 | 2.559864  | 0.594234  |
| 42 | 1 | -2.200209 | 2.931630  | 0.492497  |
| 43 | 1 | -0.788751 | 2.667797  | 1.599413  |
| 44 | 8 | 2.244717  | 0.560531  | 0.369956  |
| 45 | 6 | 2.957798  | -0.000074 | -0.693647 |
| 46 | 8 | 2.607175  | 0.144908  | -1.829165 |
| 47 | 6 | 4.196634  | -0.729081 | -0.171110 |
| 48 | 6 | 3.804681  | -1.734929 | 0.942785  |
| 49 | 1 | 3.086043  | -2.474548 | 0.576519  |
| 50 | 1 | 4.704935  | -2.265803 | 1.269205  |
| 51 | 1 | 3.372717  | -1.227054 | 1.809287  |
| 52 | 6 | 4.854371  | -1.471494 | -1.354550 |
| 53 | 1 | 5.748261  | -1.991185 | -0.995615 |
| 54 | 1 | 4.175024  | -2.213690 | -1.785747 |
| 55 | 1 | 5.152547  | -0.777169 | -2.145852 |
| 56 | 6 | 5.178975  | 0.333874  | 0.400140  |
| 57 | 1 | 6.093964  | -0.172935 | 0.723551  |
| 58 | 1 | 5.451630  | 1.074378  | -0.359945 |
| 59 | 1 | 4.752425  | 0.851651  | 1.264471  |
| 60 | 7 | -0.583439 | 3.692684  | -1.483090 |
| 61 | 1 | -1.500173 | 4.119607  | -1.573106 |
| 62 | 1 | 0.057992  | 3.833723  | -2.256987 |

**TS35-36** (E = -1633.5108702 au)

| Center Number | Atomic Number | Coordinates (Angstroms) |           |           |
|---------------|---------------|-------------------------|-----------|-----------|
|               |               | X                       | Y         | Z         |
| 1             | 77            | -0.968753               | 0.291412  | 0.236151  |
| 2             | 6             | -1.108039               | -1.827570 | -0.464366 |
| 3             | 6             | -1.278266               | -0.918367 | -1.594370 |
| 4             | 6             | -2.452974               | -0.135977 | -1.334552 |
| 5             | 6             | -2.994277               | -0.530188 | -0.045191 |
| 6             | 6             | -2.175305               | -1.597866 | 0.469832  |
| 7             | 6             | -0.145757               | -2.961235 | -0.397641 |
| 8             | 9             | 1.014937                | -2.734404 | -1.095694 |
| 9             | 9             | -0.689090               | -4.116466 | -0.940308 |
| 10            | 9             | 0.227200                | -3.290733 | 0.882253  |
| 11            | 6             | -0.509152               | -0.912125 | -2.885515 |
| 12            | 1             | -0.699835               | 0.005345  | -3.445603 |
| 13            | 1             | 0.564998                | -1.000310 | -2.731606 |
| 14            | 1             | -0.840883               | -1.758273 | -3.501692 |
| 15            | 6             | -3.092784               | 0.833711  | -2.286620 |
| 16            | 1             | -3.778957               | 0.290794  | -2.949412 |
| 17            | 1             | -3.673094               | 1.593164  | -1.757962 |
| 18            | 1             | -2.353697               | 1.343063  | -2.908838 |
| 19            | 6             | -4.287482               | -0.041674 | 0.548750  |
| 20            | 1             | -4.280322               | -0.097383 | 1.639676  |

|    |   |           |           |           |
|----|---|-----------|-----------|-----------|
| 21 | 1 | -4.488413 | 0.995214  | 0.269079  |
| 22 | 1 | -5.121084 | -0.655141 | 0.183183  |
| 23 | 6 | -2.420506 | -2.329592 | 1.758592  |
| 24 | 1 | -3.200439 | -1.840885 | 2.344243  |
| 25 | 1 | -2.753789 | -3.351264 | 1.537826  |
| 26 | 1 | -1.517968 | -2.394346 | 2.368274  |
| 27 | 8 | -0.454388 | 0.295506  | 2.341086  |
| 28 | 6 | -0.633772 | 1.246082  | 3.156180  |
| 29 | 8 | -1.054701 | 2.399822  | 2.826083  |
| 30 | 6 | -0.326653 | 0.996303  | 4.613670  |
| 31 | 1 | 0.441308  | 1.700525  | 4.950447  |
| 32 | 1 | -1.226409 | 1.178229  | 5.210835  |
| 33 | 1 | 0.017888  | -0.026465 | 4.768441  |
| 34 | 6 | 1.071941  | 2.453016  | -0.136901 |
| 35 | 7 | 0.949823  | 1.173313  | 0.023998  |
| 36 | 6 | -0.251834 | 3.105045  | -0.284502 |
| 37 | 6 | 2.359643  | 3.213029  | -0.146890 |
| 38 | 1 | 2.241417  | 4.168619  | 0.372387  |
| 39 | 1 | 3.160074  | 2.652226  | 0.333864  |
| 40 | 1 | 2.664274  | 3.422627  | -1.180841 |
| 41 | 6 | -1.319208 | 2.375782  | 0.227127  |
| 42 | 1 | -2.312575 | 2.776430  | 0.030410  |
| 43 | 1 | -1.175122 | 2.436518  | 1.568947  |
| 44 | 8 | 2.129406  | 0.478980  | 0.359474  |
| 45 | 6 | 2.850003  | -0.027860 | -0.717942 |
| 46 | 8 | 2.529374  | 0.191139  | -1.851732 |
| 47 | 6 | 4.083878  | -0.791925 | -0.228924 |
| 48 | 6 | 3.751417  | -1.703743 | 0.977863  |
| 49 | 1 | 2.982793  | -2.438893 | 0.721922  |
| 50 | 1 | 4.657596  | -2.244775 | 1.269390  |
| 51 | 1 | 3.407220  | -1.124822 | 1.839142  |
| 52 | 6 | 4.626211  | -1.635372 | -1.404486 |
| 53 | 1 | 5.527378  | -2.163829 | -1.077787 |
| 54 | 1 | 3.892138  | -2.378725 | -1.732126 |
| 55 | 1 | 4.885002  | -1.006656 | -2.261314 |
| 56 | 6 | 5.145635  | 0.267350  | 0.191016  |
| 57 | 1 | 6.065983  | -0.252329 | 0.476858  |
| 58 | 1 | 5.381270  | 0.946905  | -0.635360 |
| 59 | 1 | 4.807425  | 0.854515  | 1.050667  |
| 60 | 7 | -0.302402 | 4.321246  | -0.852146 |
| 61 | 1 | -1.190431 | 4.793047  | -0.966186 |
| 62 | 1 | 0.523167  | 4.833323  | -1.132556 |

36 (E = -1633.5225425 au)

| Center Number | Atomic Number | Coordinates (Angstroms) |           |           |
|---------------|---------------|-------------------------|-----------|-----------|
|               |               | X                       | Y         | Z         |
| 1             | 77            | -0.950105               | 0.344001  | 0.125345  |
| 2             | 6             | -1.075463               | -1.849900 | -0.466775 |
| 3             | 6             | -1.246923               | -0.968386 | -1.618321 |
| 4             | 6             | -2.443270               | -0.196091 | -1.385339 |
| 5             | 6             | -2.966296               | -0.543899 | -0.082872 |
| 6             | 6             | -2.130454               | -1.589532 | 0.462034  |
| 7             | 6             | -0.101127               | -2.971380 | -0.367599 |
| 8             | 9             | 1.031560                | -2.776008 | -1.117273 |
| 9             | 9             | -0.652706               | -4.159762 | -0.822958 |
| 10            | 9             | 0.323159                | -3.228098 | 0.914845  |
| 11            | 6             | -0.494199               | -1.003180 | -2.918480 |
| 12            | 1             | -0.713354               | -0.115334 | -3.514610 |
| 13            | 1             | 0.583200                | -1.059494 | -2.773718 |
| 14            | 1             | -0.814624               | -1.883057 | -3.492044 |

|    |   |           |           |           |
|----|---|-----------|-----------|-----------|
| 15 | 6 | -3.103174 | 0.716751  | -2.378752 |
| 16 | 1 | -3.746370 | 0.122375  | -3.040400 |
| 17 | 1 | -3.730811 | 1.462222  | -1.885700 |
| 18 | 1 | -2.373374 | 1.242538  | -2.998091 |
| 19 | 6 | -4.264772 | -0.061959 | 0.506196  |
| 20 | 1 | -4.241443 | -0.068278 | 1.598643  |
| 21 | 1 | -4.496632 | 0.955482  | 0.182405  |
| 22 | 1 | -5.086995 | -0.713262 | 0.182800  |
| 23 | 6 | -2.382132 | -2.265108 | 1.778141  |
| 24 | 1 | -2.907031 | -1.599135 | 2.465821  |
| 25 | 1 | -3.024077 | -3.139821 | 1.608335  |
| 26 | 1 | -1.463107 | -2.605216 | 2.253290  |
| 27 | 8 | -0.435690 | 0.449818  | 2.276693  |
| 28 | 6 | -0.708634 | 1.285867  | 3.147571  |
| 29 | 8 | -1.266381 | 2.446097  | 2.887418  |
| 30 | 6 | -0.415652 | 1.037124  | 4.595683  |
| 31 | 1 | 0.300640  | 1.782957  | 4.956799  |
| 32 | 1 | -1.333013 | 1.150803  | 5.182367  |
| 33 | 1 | -0.006845 | 0.036941  | 4.732156  |
| 34 | 6 | 1.091034  | 2.494709  | -0.141516 |
| 35 | 7 | 0.982185  | 1.197591  | -0.079344 |
| 36 | 6 | -0.208539 | 3.164527  | -0.260825 |
| 37 | 6 | 2.375413  | 3.258604  | -0.087711 |
| 38 | 1 | 2.365999  | 3.946134  | 0.767348  |
| 39 | 1 | 3.245073  | 2.612229  | 0.002423  |
| 40 | 1 | 2.473268  | 3.864796  | -0.995928 |
| 41 | 6 | -1.285064 | 2.353068  | -0.069719 |
| 42 | 1 | -2.285618 | 2.771541  | -0.168951 |
| 43 | 1 | -1.355189 | 2.549081  | 1.905910  |
| 44 | 8 | 2.159497  | 0.498967  | 0.277397  |
| 45 | 6 | 2.852145  | -0.068887 | -0.778536 |
| 46 | 8 | 2.525855  | 0.098137  | -1.921124 |
| 47 | 6 | 4.083007  | -0.831032 | -0.273309 |
| 48 | 6 | 3.777208  | -1.624587 | 1.020567  |
| 49 | 1 | 2.973899  | -2.350485 | 0.862461  |
| 50 | 1 | 4.677138  | -2.171884 | 1.319870  |
| 51 | 1 | 3.491151  | -0.962413 | 1.842346  |
| 52 | 6 | 4.553177  | -1.790235 | -1.389910 |
| 53 | 1 | 5.456681  | -2.310829 | -1.056634 |
| 54 | 1 | 3.788884  | -2.540759 | -1.616465 |
| 55 | 1 | 4.785829  | -1.247124 | -2.310302 |
| 56 | 6 | 5.191293  | 0.225980  | 0.009325  |
| 57 | 1 | 6.106982  | -0.294658 | 0.308647  |
| 58 | 1 | 5.413814  | 0.819888  | -0.884138 |
| 59 | 1 | 4.903905  | 0.900077  | 0.822732  |
| 60 | 7 | -0.225386 | 4.510761  | -0.646479 |
| 61 | 1 | -1.147699 | 4.931372  | -0.587074 |
| 62 | 1 | 0.456791  | 5.106442  | -0.186070 |

**37** (E = -1404.3590729 au)

| Center Number | Atomic Number | Coordinates (Angstroms) |           |           |
|---------------|---------------|-------------------------|-----------|-----------|
|               |               | X                       | Y         | Z         |
| 1             | 77            | 1.018419                | 0.462079  | -0.047513 |
| 2             | 6             | 0.969411                | -1.821717 | -0.066025 |
| 3             | 6             | 1.109103                | -1.334788 | 1.273086  |
| 4             | 6             | 2.350582                | -0.555679 | 1.313547  |
| 5             | 6             | 2.939104                | -0.564116 | 0.002778  |
| 6             | 6             | 2.062333                | -1.327149 | -0.862553 |
| 7             | 6             | -0.060964               | -2.763970 | -0.590228 |
| 8             | 9             | -1.059922               | -3.038478 | 0.304076  |

|    |   |           |           |           |
|----|---|-----------|-----------|-----------|
| 9  | 9 | 0.505634  | -3.983337 | -0.921278 |
| 10 | 9 | -0.677709 | -2.321582 | -1.741149 |
| 11 | 6 | 0.277472  | -1.657582 | 2.480103  |
| 12 | 1 | 0.472345  | -0.946441 | 3.284870  |
| 13 | 1 | -0.789605 | -1.645368 | 2.263718  |
| 14 | 1 | 0.543871  | -2.659358 | 2.843127  |
| 15 | 6 | 2.959493  | 0.024061  | 2.555618  |
| 16 | 1 | 3.510100  | -0.761894 | 3.089776  |
| 17 | 1 | 3.660349  | 0.827556  | 2.320191  |
| 18 | 1 | 2.198961  | 0.421729  | 3.231611  |
| 19 | 6 | 4.279184  | -0.003109 | -0.384859 |
| 20 | 1 | 4.289349  | 0.328549  | -1.426151 |
| 21 | 1 | 4.553266  | 0.848337  | 0.242562  |
| 22 | 1 | 5.052673  | -0.772552 | -0.267029 |
| 23 | 6 | 2.331093  | -1.623648 | -2.307378 |
| 24 | 1 | 2.963398  | -2.519394 | -2.376642 |
| 25 | 1 | 1.414554  | -1.810586 | -2.868487 |
| 26 | 1 | 2.869639  | -0.800888 | -2.783162 |
| 27 | 6 | -0.895571 | 2.683910  | -0.460702 |
| 28 | 7 | -0.918538 | 1.419927  | -0.203171 |
| 29 | 6 | 0.469171  | 3.278578  | -0.271982 |
| 30 | 6 | -2.067690 | 3.499736  | -0.896281 |
| 31 | 1 | -1.854110 | 3.973127  | -1.862409 |
| 32 | 1 | -2.967707 | 2.898046  | -0.998345 |
| 33 | 1 | -2.254287 | 4.297897  | -0.167824 |
| 34 | 6 | 1.488533  | 2.398032  | -0.034041 |
| 35 | 1 | 2.489224  | 2.791203  | 0.128871  |
| 36 | 8 | -2.123697 | 0.766316  | -0.523909 |
| 37 | 6 | -2.790660 | 0.228418  | 0.565806  |
| 38 | 8 | -2.384658 | 0.356026  | 1.687203  |
| 39 | 6 | -4.102465 | -0.439096 | 0.139629  |
| 40 | 6 | -4.096362 | -0.894091 | -1.337592 |
| 41 | 1 | -3.293412 | -1.611434 | -1.532655 |
| 42 | 1 | -5.051051 | -1.382216 | -1.559060 |
| 43 | 1 | -3.980588 | -0.049611 | -2.022921 |
| 44 | 6 | -4.354608 | -1.649386 | 1.070978  |
| 45 | 1 | -5.327281 | -2.089193 | 0.828243  |
| 46 | 1 | -3.588120 | -2.419373 | 0.936749  |
| 47 | 1 | -4.363814 | -1.346473 | 2.121691  |
| 48 | 6 | -5.217779 | 0.626679  | 0.360036  |
| 49 | 1 | -6.186506 | 0.179245  | 0.114558  |
| 50 | 1 | -5.245356 | 0.959400  | 1.402749  |
| 51 | 1 | -5.073700 | 1.499576  | -0.285638 |
| 52 | 7 | 0.555732  | 4.641858  | -0.278864 |
| 53 | 1 | 1.480816  | 5.053956  | -0.260565 |
| 54 | 1 | -0.143083 | 5.204884  | -0.745932 |

38 (E = -1868.1072956 au)

| Center Number | Atomic Number | Coordinates (Angstroms) |          |           |
|---------------|---------------|-------------------------|----------|-----------|
|               |               | X                       | Y        | Z         |
| 1             | 77            | 0.109207                | 0.249952 | 0.725366  |
| 2             | 6             | 1.035397                | 2.136295 | -0.150514 |
| 3             | 6             | 1.481890                | 2.005984 | 1.227597  |
| 4             | 6             | 0.316742                | 2.112132 | 2.051650  |
| 5             | 6             | -0.842339               | 2.274396 | 1.208407  |
| 6             | 6             | -0.385583               | 2.345278 | -0.154643 |
| 7             | 6             | 1.918487                | 2.304855 | -1.340812 |
| 8             | 9             | 3.158722                | 1.742424 | -1.182427 |
| 9             | 9             | 2.139821                | 3.643525 | -1.617797 |
| 10            | 9             | 1.393191                | 1.767508 | -2.493170 |

|    |   |           |           |           |
|----|---|-----------|-----------|-----------|
| 11 | 6 | 2.894693  | 1.970971  | 1.739674  |
| 12 | 1 | 2.917588  | 1.667527  | 2.788079  |
| 13 | 1 | 3.526664  | 1.290265  | 1.172473  |
| 14 | 1 | 3.323904  | 2.979233  | 1.671797  |
| 15 | 6 | 0.306695  | 2.171288  | 3.551720  |
| 16 | 1 | 0.481425  | 3.208471  | 3.866575  |
| 17 | 1 | -0.655397 | 1.857851  | 3.962483  |
| 18 | 1 | 1.087498  | 1.549007  | 3.993900  |
| 19 | 6 | -2.222436 | 2.614818  | 1.702257  |
| 20 | 1 | -2.979457 | 2.499733  | 0.925221  |
| 21 | 1 | -2.515463 | 1.992032  | 2.551309  |
| 22 | 1 | -2.241240 | 3.661396  | 2.032820  |
| 23 | 6 | -1.240998 | 2.743934  | -1.323473 |
| 24 | 1 | -1.264502 | 3.840861  | -1.369009 |
| 25 | 1 | -0.854815 | 2.380039  | -2.275283 |
| 26 | 1 | -2.272382 | 2.404550  | -1.209278 |
| 27 | 6 | 1.527781  | -2.167711 | 1.673327  |
| 28 | 7 | 1.497668  | -1.311013 | 0.684160  |
| 29 | 6 | 0.585592  | -1.834705 | 2.729949  |
| 30 | 6 | 2.388526  | -3.389723 | 1.714798  |
| 31 | 1 | 1.873313  | -4.180104 | 2.266321  |
| 32 | 1 | 2.640267  | -3.747668 | 0.716235  |
| 33 | 1 | 3.324353  | -3.167024 | 2.243883  |
| 34 | 6 | -0.251469 | -0.811366 | 2.431303  |
| 35 | 1 | -1.052549 | -0.535561 | 3.112244  |
| 36 | 8 | 2.208587  | -1.653902 | -0.485534 |
| 37 | 6 | 3.562799  | -1.356342 | -0.500300 |
| 38 | 8 | 4.127875  | -0.893815 | 0.451128  |
| 39 | 6 | 4.189416  | -1.773687 | -1.836040 |
| 40 | 6 | 3.271069  | -1.430627 | -3.034942 |
| 41 | 1 | 3.058280  | -0.358289 | -3.080992 |
| 42 | 1 | 3.779634  | -1.717056 | -3.961473 |
| 43 | 1 | 2.322401  | -1.972231 | -2.985879 |
| 44 | 6 | 5.547761  | -1.051623 | -1.981816 |
| 45 | 1 | 6.022186  | -1.369953 | -2.915585 |
| 46 | 1 | 5.418342  | 0.035162  | -2.016211 |
| 47 | 1 | 6.219212  | -1.292352 | -1.152711 |
| 48 | 6 | 4.417108  | -3.313244 | -1.775323 |
| 49 | 1 | 4.922177  | -3.630799 | -2.693547 |
| 50 | 1 | 5.050062  | -3.590393 | -0.925247 |
| 51 | 1 | 3.468756  | -3.855551 | -1.705363 |
| 52 | 6 | -0.768951 | -0.662428 | -1.086662 |
| 53 | 1 | -1.109778 | 0.149939  | -1.715842 |
| 54 | 1 | -0.031081 | -1.311835 | -1.541796 |
| 55 | 6 | -1.628022 | -1.179269 | -0.102490 |
| 56 | 6 | -1.518392 | -2.639468 | 0.287788  |
| 57 | 1 | -0.498838 | -3.016844 | 0.204509  |
| 58 | 1 | -1.889107 | -2.826602 | 1.298973  |
| 59 | 1 | -2.134540 | -3.224204 | -0.408480 |
| 60 | 6 | -2.979099 | -0.534779 | 0.174971  |
| 61 | 1 | -3.176063 | -0.537037 | 1.253279  |
| 62 | 1 | -2.971723 | 0.506441  | -0.149617 |
| 63 | 6 | -4.134292 | -1.261071 | -0.547623 |
| 64 | 1 | -4.268540 | -2.282502 | -0.177723 |
| 65 | 1 | -3.924858 | -1.344294 | -1.623359 |
| 66 | 6 | -5.453421 | -0.528788 | -0.391446 |
| 67 | 8 | -5.589382 | 0.603232  | 0.055683  |
| 68 | 8 | -6.486635 | -1.286863 | -0.826396 |
| 69 | 6 | -7.837565 | -0.686570 | -0.761741 |
| 70 | 1 | -7.832234 | 0.224771  | -1.366028 |
| 71 | 1 | -8.038129 | -0.416547 | 0.278629  |
| 72 | 6 | -8.813155 | -1.723294 | -1.287574 |
| 73 | 1 | -9.829559 | -1.316792 | -1.256131 |

|    |   |           |           |           |
|----|---|-----------|-----------|-----------|
| 74 | 1 | -8.583793 | -1.990848 | -2.323768 |
| 75 | 1 | -8.789302 | -2.631625 | -0.677391 |
| 76 | 7 | 0.514662  | -2.683860 | 3.861551  |
| 77 | 1 | -0.168731 | -2.347514 | 4.534725  |
| 78 | 1 | 1.407296  | -2.789017 | 4.339847  |

**TS38-39** (E = -1868.082908 au)

| Center Number | Atomic Number | Coordinates (Angstroms) |           |           |
|---------------|---------------|-------------------------|-----------|-----------|
|               |               | X                       | Y         | Z         |
| 1             | 77            | 0.228922                | 0.386133  | 0.526181  |
| 2             | 6             | 1.138504                | 2.229155  | -0.438315 |
| 3             | 6             | 1.606562                | 2.152051  | 0.946786  |
| 4             | 6             | 0.459802                | 2.266448  | 1.787831  |
| 5             | 6             | -0.714208               | 2.388586  | 0.947779  |
| 6             | 6             | -0.281697               | 2.415930  | -0.424057 |
| 7             | 6             | 2.004608                | 2.378348  | -1.635552 |
| 8             | 9             | 3.245160                | 1.802683  | -1.487915 |
| 9             | 9             | 2.250862                | 3.714030  | -1.932002 |
| 10            | 9             | 1.468159                | 1.843459  | -2.784920 |
| 11            | 6             | 3.032538                | 2.158357  | 1.425229  |
| 12            | 1             | 3.087671                | 1.889468  | 2.482016  |
| 13            | 1             | 3.665970                | 1.470047  | 0.868431  |
| 14            | 1             | 3.446249                | 3.169536  | 1.312532  |
| 15            | 6             | 0.458125                | 2.348332  | 3.289482  |
| 16            | 1             | 0.491091                | 3.399449  | 3.605360  |
| 17            | 1             | -0.446481               | 1.902861  | 3.711618  |
| 18            | 1             | 1.320216                | 1.838893  | 3.726335  |
| 19            | 6             | -2.100570               | 2.704855  | 1.442937  |
| 20            | 1             | -2.870790               | 2.416132  | 0.724065  |
| 21            | 1             | -2.315912               | 2.201894  | 2.389399  |
| 22            | 1             | -2.194709               | 3.785489  | 1.613868  |
| 23            | 6             | -1.173400               | 2.690171  | -1.603634 |
| 24            | 1             | -1.123983               | 3.760083  | -1.844577 |
| 25            | 1             | -0.873199               | 2.132705  | -2.491471 |
| 26            | 1             | -2.215699               | 2.454404  | -1.378875 |
| 27            | 6             | 1.251628                | -2.275011 | 1.318849  |
| 28            | 7             | 1.425671                | -1.275042 | 0.481292  |
| 29            | 6             | 0.163960                | -2.009790 | 2.240439  |
| 30            | 6             | 2.033680                | -3.552671 | 1.316710  |
| 31            | 1             | 1.389291                | -4.394868 | 1.585671  |
| 32            | 1             | 2.473779                | -3.756323 | 0.340683  |
| 33            | 1             | 2.847219                | -3.499792 | 2.051862  |
| 34            | 6             | -0.606253               | -0.903094 | 1.906612  |
| 35            | 1             | -1.396331               | -0.605769 | 2.588013  |
| 36            | 8             | 2.339693                | -1.507471 | -0.573505 |
| 37            | 6             | 3.680789                | -1.319204 | -0.281278 |
| 38            | 8             | 4.060118                | -1.015849 | 0.816048  |
| 39            | 6             | 4.560480                | -1.622433 | -1.500988 |
| 40            | 6             | 3.824109                | -1.404749 | -2.842937 |
| 41            | 1             | 3.475602                | -0.373280 | -2.946158 |
| 42            | 1             | 4.519002                | -1.614303 | -3.662758 |
| 43            | 1             | 2.965019                | -2.073507 | -2.946264 |
| 44            | 6             | 5.815380                | -0.719859 | -1.423865 |
| 45            | 1             | 6.483745                | -0.968203 | -2.254529 |
| 46            | 1             | 5.549141                | 0.339114  | -1.504223 |
| 47            | 1             | 6.356851                | -0.871551 | -0.485953 |
| 48            | 6             | 4.987938                | -3.115822 | -1.376486 |
| 49            | 1             | 5.685491                | -3.349783 | -2.187473 |
| 50            | 1             | 5.492174                | -3.308014 | -0.423653 |
| 51            | 1             | 4.128378                | -3.788623 | -1.467303 |

|    |   |           |           |           |
|----|---|-----------|-----------|-----------|
| 52 | 6 | -1.166609 | -0.684405 | -0.751995 |
| 53 | 1 | -1.815662 | 0.084698  | -1.160972 |
| 54 | 1 | -0.613102 | -1.213399 | -1.524543 |
| 55 | 6 | -1.798909 | -1.540866 | 0.237214  |
| 56 | 6 | -1.612006 | -3.034183 | 0.108745  |
| 57 | 1 | -0.616103 | -3.297285 | -0.253082 |
| 58 | 1 | -1.824125 | -3.565790 | 1.040263  |
| 59 | 1 | -2.323736 | -3.390467 | -0.650999 |
| 60 | 6 | -3.140156 | -1.101167 | 0.809628  |
| 61 | 1 | -3.345611 | -1.635430 | 1.743127  |
| 62 | 1 | -3.116225 | -0.032304 | 1.036015  |
| 63 | 6 | -4.290326 | -1.371612 | -0.187035 |
| 64 | 1 | -4.424102 | -2.443836 | -0.366699 |
| 65 | 1 | -4.079541 | -0.917215 | -1.163667 |
| 66 | 6 | -5.612926 | -0.815307 | 0.307342  |
| 67 | 8 | -5.768106 | -0.142012 | 1.317743  |
| 68 | 8 | -6.621387 | -1.156379 | -0.526616 |
| 69 | 6 | -7.976511 | -0.670582 | -0.181661 |
| 70 | 1 | -7.945246 | 0.421879  | -0.147521 |
| 71 | 1 | -8.226649 | -1.046357 | 0.814141  |
| 72 | 6 | -8.921692 | -1.188936 | -1.249697 |
| 73 | 1 | -9.940015 | -0.850847 | -1.030652 |
| 74 | 1 | -8.642329 | -0.813827 | -2.239213 |
| 75 | 1 | -8.923135 | -2.283070 | -1.276922 |
| 76 | 7 | -0.107968 | -2.892218 | 3.250885  |
| 77 | 1 | -0.743610 | -2.581391 | 3.975761  |
| 78 | 1 | 0.626668  | -3.502613 | 3.586669  |

**39** (E = -1868.1058286 au)

| Center Number | Atomic Number | Coordinates (Angstroms) |           |           |
|---------------|---------------|-------------------------|-----------|-----------|
|               |               | X                       | Y         | Z         |
| 1             | 77            | 0.217757                | 0.472990  | 0.725240  |
| 2             | 6             | 0.860239                | 2.333232  | -0.220943 |
| 3             | 6             | 1.735903                | 2.293732  | 0.959630  |
| 4             | 6             | 0.912903                | 2.317933  | 2.098051  |
| 5             | 6             | -0.476864               | 2.386929  | 1.655568  |
| 6             | 6             | -0.511142               | 2.499890  | 0.229285  |
| 7             | 6             | 1.336164                | 2.571855  | -1.610119 |
| 8             | 9             | 2.524969                | 1.940386  | -1.896020 |
| 9             | 9             | 1.566555                | 3.921393  | -1.850029 |
| 10            | 9             | 0.446925                | 2.171428  | -2.578349 |
| 11            | 6             | 3.239203                | 2.312642  | 0.948001  |
| 12            | 1             | 3.641753                | 2.118385  | 1.943966  |
| 13            | 1             | 3.658959                | 1.576128  | 0.262761  |
| 14            | 1             | 3.589441                | 3.303218  | 0.629714  |
| 15            | 6             | 1.342229                | 2.324081  | 3.538590  |
| 16            | 1             | 1.233261                | 3.330893  | 3.962695  |
| 17            | 1             | 0.728532                | 1.648072  | 4.142892  |
| 18            | 1             | 2.386011                | 2.023190  | 3.654329  |
| 19            | 6             | -1.643989               | 2.569071  | 2.586882  |
| 20            | 1             | -2.595201               | 2.337284  | 2.103755  |
| 21            | 1             | -1.549836               | 1.939864  | 3.476250  |
| 22            | 1             | -1.682939               | 3.613576  | 2.923151  |
| 23            | 6             | -1.716143               | 2.849568  | -0.600518 |
| 24            | 1             | -1.729143               | 3.932138  | -0.781991 |
| 25            | 1             | -1.711300               | 2.347360  | -1.568603 |
| 26            | 1             | -2.640724               | 2.587440  | -0.081468 |
| 27            | 6             | 1.239420                | -2.074469 | 1.490998  |
| 28            | 7             | 1.396707                | -1.259265 | 0.511312  |
| 29            | 6             | 0.204374                | -1.478199 | 2.392235  |

|    |   |           |           |           |
|----|---|-----------|-----------|-----------|
| 30 | 6 | 1.921530  | -3.379744 | 1.731491  |
| 31 | 1 | 1.262875  | -4.058618 | 2.277798  |
| 32 | 1 | 2.222995  | -3.842255 | 0.789511  |
| 33 | 1 | 2.824996  | -3.224699 | 2.336091  |
| 34 | 6 | -1.013811 | -1.006006 | 1.844356  |
| 35 | 1 | -1.662950 | -0.570615 | 2.601052  |
| 36 | 8 | 2.167619  | -1.678602 | -0.583208 |
| 37 | 6 | 3.541237  | -1.463636 | -0.468267 |
| 38 | 8 | 4.026946  | -1.024424 | 0.534681  |
| 39 | 6 | 4.257975  | -1.913656 | -1.742700 |
| 40 | 6 | 3.550047  | -1.353583 | -3.002969 |
| 41 | 1 | 3.510801  | -0.259708 | -2.985050 |
| 42 | 1 | 4.114706  | -1.660750 | -3.889307 |
| 43 | 1 | 2.530416  | -1.737042 | -3.096778 |
| 44 | 6 | 5.716651  | -1.410132 | -1.681213 |
| 45 | 1 | 6.248117  | -1.746251 | -2.577117 |
| 46 | 1 | 5.758681  | -0.316485 | -1.647460 |
| 47 | 1 | 6.238297  | -1.801787 | -0.803017 |
| 48 | 6 | 4.235600  | -3.469828 | -1.772054 |
| 49 | 1 | 4.790733  | -3.812389 | -2.651314 |
| 50 | 1 | 4.714105  | -3.892727 | -0.881743 |
| 51 | 1 | 3.213387  | -3.853782 | -1.842963 |
| 52 | 6 | -1.109072 | -0.624121 | -0.506605 |
| 53 | 1 | -1.819293 | 0.044871  | -0.991776 |
| 54 | 1 | -0.565824 | -1.179678 | -1.272952 |
| 55 | 6 | -1.757328 | -1.518556 | 0.573483  |
| 56 | 6 | -1.590595 | -3.031370 | 0.322196  |
| 57 | 1 | -0.542723 | -3.313447 | 0.186602  |
| 58 | 1 | -2.001854 | -3.614458 | 1.155848  |
| 59 | 1 | -2.114135 | -3.323020 | -0.594676 |
| 60 | 6 | -3.257527 | -1.170543 | 0.781565  |
| 61 | 1 | -3.615760 | -1.679463 | 1.687288  |
| 62 | 1 | -3.338465 | -0.092963 | 0.969917  |
| 63 | 6 | -4.164435 | -1.537031 | -0.400895 |
| 64 | 1 | -4.273456 | -2.621822 | -0.507637 |
| 65 | 1 | -3.737368 | -1.180188 | -1.348772 |
| 66 | 6 | -5.556606 | -0.948016 | -0.285350 |
| 67 | 8 | -5.923707 | -0.132832 | 0.552141  |
| 68 | 8 | -6.372527 | -1.434880 | -1.252274 |
| 69 | 6 | -7.761052 | -0.928950 | -1.282504 |
| 70 | 1 | -7.724568 | 0.157601  | -1.400494 |
| 71 | 1 | -8.227957 | -1.161452 | -0.321383 |
| 72 | 6 | -8.460365 | -1.611962 | -2.443817 |
| 73 | 1 | -9.497314 | -1.264559 | -2.501896 |
| 74 | 1 | -7.967740 | -1.378035 | -3.392846 |
| 75 | 1 | -8.470572 | -2.698634 | -2.313137 |
| 76 | 7 | 0.486732  | -1.445339 | 3.706320  |
| 77 | 1 | -0.194343 | -1.072835 | 4.357498  |
| 78 | 1 | 1.442103  | -1.482062 | 4.041064  |

40 (E = -1663.4798623 au)

| Center Number | Atomic Number | Coordinates (Angstroms) |          |           |
|---------------|---------------|-------------------------|----------|-----------|
|               |               | X                       | Y        | Z         |
| 1             | 77            | 0.128616                | 0.252618 | 0.735154  |
| 2             | 6             | 1.017390                | 2.138778 | -0.203234 |
| 3             | 6             | 1.469939                | 2.035909 | 1.176603  |
| 4             | 6             | 0.304130                | 2.146621 | 2.002805  |
| 5             | 6             | -0.857093               | 2.276910 | 1.159523  |
| 6             | 6             | -0.403462               | 2.324875 | -0.206813 |
| 7             | 6             | 1.893964                | 2.304413 | -1.397818 |

|    |   |           |           |           |
|----|---|-----------|-----------|-----------|
| 8  | 9 | 3.149678  | 1.781413  | -1.228896 |
| 9  | 9 | 2.077676  | 3.642997  | -1.705033 |
| 10 | 9 | 1.384078  | 1.728553  | -2.538672 |
| 11 | 6 | 2.885639  | 2.035584  | 1.683959  |
| 12 | 1 | 2.914261  | 1.783862  | 2.745908  |
| 13 | 1 | 3.519673  | 1.330717  | 1.148720  |
| 14 | 1 | 3.309285  | 3.041306  | 1.565053  |
| 15 | 6 | 0.296286  | 2.240805  | 3.501727  |
| 16 | 1 | 0.451049  | 3.287927  | 3.793026  |
| 17 | 1 | -0.658498 | 1.917803  | 3.922160  |
| 18 | 1 | 1.089868  | 1.643900  | 3.955939  |
| 19 | 6 | -2.239683 | 2.619396  | 1.645884  |
| 20 | 1 | -2.991891 | 2.495868  | 0.865228  |
| 21 | 1 | -2.535881 | 2.006447  | 2.500944  |
| 22 | 1 | -2.261922 | 3.669775  | 1.964018  |
| 23 | 6 | -1.272989 | 2.670680  | -1.382108 |
| 24 | 1 | -1.346497 | 3.764591  | -1.443481 |
| 25 | 1 | -0.868893 | 2.309798  | -2.327597 |
| 26 | 1 | -2.288264 | 2.285510  | -1.265087 |
| 27 | 6 | 1.591721  | -2.131320 | 1.696208  |
| 28 | 7 | 1.527716  | -1.295503 | 0.688124  |
| 29 | 6 | 0.665103  | -1.799966 | 2.762772  |
| 30 | 6 | 0.641950  | -2.583968 | 4.058470  |
| 31 | 1 | -0.095961 | -2.151015 | 4.740254  |
| 32 | 1 | 0.372988  | -3.635709 | 3.898247  |
| 33 | 1 | 1.617355  | -2.565723 | 4.559788  |
| 34 | 6 | 2.493167  | -3.326652 | 1.738514  |
| 35 | 1 | 2.008577  | -4.145599 | 2.275266  |
| 36 | 1 | 2.768667  | -3.671298 | 0.741892  |
| 37 | 1 | 3.412460  | -3.073857 | 2.282280  |
| 38 | 6 | -0.178712 | -0.785042 | 2.453394  |
| 39 | 1 | -0.960145 | -0.495209 | 3.152170  |
| 40 | 8 | 2.238662  | -1.632653 | -0.484936 |
| 41 | 6 | 3.586284  | -1.312811 | -0.505202 |
| 42 | 8 | 4.146334  | -0.831740 | 0.440599  |
| 43 | 6 | 4.222352  | -1.732126 | -1.836293 |
| 44 | 6 | 3.293248  | -1.437501 | -3.039234 |
| 45 | 1 | 3.046930  | -0.373273 | -3.102336 |
| 46 | 1 | 3.809847  | -1.722677 | -3.961707 |
| 47 | 1 | 2.361972  | -2.007469 | -2.980099 |
| 48 | 6 | 5.558420  | -0.972057 | -1.995577 |
| 49 | 1 | 6.041616  | -1.289612 | -2.925156 |
| 50 | 1 | 5.396502  | 0.109709  | -2.045851 |
| 51 | 1 | 6.237392  | -1.180134 | -1.163811 |
| 52 | 6 | 4.497769  | -3.262693 | -1.750381 |
| 53 | 1 | 5.008109  | -3.580602 | -2.665586 |
| 54 | 1 | 5.143123  | -3.505006 | -0.898963 |
| 55 | 1 | 3.567154  | -3.832994 | -1.665817 |
| 56 | 6 | -0.799710 | -0.738974 | -1.019810 |
| 57 | 1 | -1.163511 | 0.053459  | -1.662101 |
| 58 | 1 | -0.065416 | -1.393885 | -1.473398 |
| 59 | 6 | -1.642843 | -1.242431 | -0.018088 |
| 60 | 6 | -1.504492 | -2.687007 | 0.413648  |
| 61 | 1 | -0.482221 | -3.055128 | 0.321411  |
| 62 | 1 | -1.856177 | -2.850102 | 1.435617  |
| 63 | 1 | -2.129119 | -3.294762 | -0.254620 |
| 64 | 6 | -2.995402 | -0.607986 | 0.259794  |
| 65 | 1 | -3.184005 | -0.591535 | 1.340868  |
| 66 | 1 | -2.992444 | 0.429074  | -0.086806 |
| 67 | 6 | -4.160600 | -1.353678 | -0.442994 |
| 68 | 1 | -4.259648 | -2.367505 | -0.034555 |
| 69 | 1 | -3.931152 | -1.461005 | -1.513147 |
| 70 | 6 | -5.501737 | -0.614705 | -0.280342 |

|    |   |           |           |           |
|----|---|-----------|-----------|-----------|
| 71 | 1 | -5.717001 | -0.488998 | 0.790194  |
| 72 | 1 | -5.409961 | 0.398738  | -0.695598 |
| 73 | 6 | -6.671447 | -1.344714 | -0.959042 |
| 74 | 1 | -6.807240 | -2.348417 | -0.537824 |
| 75 | 1 | -7.610634 | -0.795891 | -0.827704 |
| 76 | 1 | -6.494889 | -1.455126 | -2.036079 |

**TS40-41** (E = -1663.4394018 au)

| Center Number | Atomic Number | Coordinates (Angstroms) |           |           |
|---------------|---------------|-------------------------|-----------|-----------|
|               |               | X                       | Y         | Z         |
| 1             | 77            | 0.201722                | 0.401328  | 0.518853  |
| 2             | 6             | 1.088787                | 2.214638  | -0.282078 |
| 3             | 6             | 1.570698                | 2.204080  | 1.113146  |
| 4             | 6             | 0.438218                | 2.277778  | 1.941335  |
| 5             | 6             | -0.751202               | 2.355851  | 1.098557  |
| 6             | 6             | -0.343774               | 2.409887  | -0.273485 |
| 7             | 6             | 1.965517                | 2.394398  | -1.473254 |
| 8             | 9             | 3.181449                | 1.764913  | -1.354067 |
| 9             | 9             | 2.256856                | 3.734075  | -1.686234 |
| 10            | 9             | 1.410129                | 1.942076  | -2.644744 |
| 11            | 6             | 3.004498                | 2.212440  | 1.562380  |
| 12            | 1             | 3.074218                | 2.060417  | 2.641437  |
| 13            | 1             | 3.598306                | 1.442356  | 1.069634  |
| 14            | 1             | 3.453737                | 3.186980  | 1.329855  |
| 15            | 6             | 0.417918                | 2.330911  | 3.443504  |
| 16            | 1             | 0.330650                | 3.372899  | 3.778333  |
| 17            | 1             | -0.434708               | 1.782789  | 3.853754  |
| 18            | 1             | 1.328724                | 1.913478  | 3.878200  |
| 19            | 6             | -2.136331               | 2.615692  | 1.622131  |
| 20            | 1             | -2.904226               | 2.420254  | 0.871126  |
| 21            | 1             | -2.357084               | 2.009883  | 2.505454  |
| 22            | 1             | -2.219684               | 3.670152  | 1.917334  |
| 23            | 6             | -1.239709               | 2.710248  | -1.443855 |
| 24            | 1             | -1.213814               | 3.788233  | -1.648772 |
| 25            | 1             | -0.928446               | 2.187480  | -2.348520 |
| 26            | 1             | -2.275487               | 2.439201  | -1.228115 |
| 27            | 6             | 1.337899                | -2.162607 | 1.501731  |
| 28            | 7             | 1.448415                | -1.274797 | 0.547089  |
| 29            | 6             | 0.282391                | -1.813841 | 2.443157  |
| 30            | 6             | 0.321784                | -2.327993 | 3.855973  |
| 31            | 1             | -0.475315               | -1.876367 | 4.451164  |
| 32            | 1             | 0.186276                | -3.418233 | 3.880003  |
| 33            | 1             | 1.284632                | -2.113940 | 4.335480  |
| 34            | 6             | 2.176278                | -3.398147 | 1.624098  |
| 35            | 1             | 1.615351                | -4.198520 | 2.111312  |
| 36            | 1             | 2.522510                | -3.749192 | 0.651561  |
| 37            | 1             | 3.057223                | -3.183019 | 2.242903  |
| 38            | 6             | -0.699514               | -0.987705 | 1.940153  |
| 39            | 1             | -1.447010               | -0.640521 | 2.643707  |
| 40            | 8             | 2.247738                | -1.649116 | -0.558234 |
| 41            | 6             | 3.590063                | -1.313729 | -0.478479 |
| 42            | 8             | 4.066271                | -0.823968 | 0.507752  |
| 43            | 6             | 4.326483                | -1.726373 | -1.757735 |
| 44            | 6             | 3.495519                | -1.405700 | -3.024726 |
| 45            | 1             | 3.269093                | -0.337208 | -3.092782 |
| 46            | 1             | 4.077242                | -1.688209 | -3.908327 |
| 47            | 1             | 2.554930                | -1.962925 | -3.042611 |
| 48            | 6             | 5.678420                | -0.979616 | -1.801868 |
| 49            | 1             | 6.229292                | -1.291711 | -2.694900 |
| 50            | 1             | 5.532364                | 0.104409  | -1.850662 |

|    |   |           |           |           |
|----|---|-----------|-----------|-----------|
| 51 | 1 | 6.288228  | -1.205630 | -0.922450 |
| 52 | 6 | 4.578079  | -3.260838 | -1.669449 |
| 53 | 1 | 5.155601  | -3.573552 | -2.545581 |
| 54 | 1 | 5.151948  | -3.520352 | -0.772976 |
| 55 | 1 | 3.637835  | -3.821424 | -1.665163 |
| 56 | 6 | -1.026311 | -0.724891 | -0.756143 |
| 57 | 1 | -1.723004 | -0.070660 | -1.273222 |
| 58 | 1 | -0.480917 | -1.353902 | -1.456915 |
| 59 | 6 | -1.603485 | -1.455993 | 0.413606  |
| 60 | 6 | -1.456205 | -2.980518 | 0.310322  |
| 61 | 1 | -0.435739 | -3.284118 | 0.070797  |
| 62 | 1 | -1.777890 | -3.478724 | 1.230193  |
| 63 | 1 | -2.090116 | -3.320763 | -0.517171 |
| 64 | 6 | -3.034288 | -1.022720 | 0.796633  |
| 65 | 1 | -3.304835 | -1.471381 | 1.760928  |
| 66 | 1 | -3.051422 | 0.064812  | 0.926021  |
| 67 | 6 | -4.105442 | -1.418351 | -0.246992 |
| 68 | 1 | -4.189768 | -2.511168 | -0.305019 |
| 69 | 1 | -3.807479 | -1.068720 | -1.244863 |
| 70 | 6 | -5.486923 | -0.831517 | 0.102955  |
| 71 | 1 | -5.775969 | -1.162087 | 1.110510  |
| 72 | 1 | -5.413686 | 0.264076  | 0.149565  |
| 73 | 6 | -6.577147 | -1.232937 | -0.902968 |
| 74 | 1 | -6.694734 | -2.322837 | -0.942618 |
| 75 | 1 | -7.546216 | -0.800786 | -0.629712 |
| 76 | 1 | -6.327999 | -0.886451 | -1.913591 |

**41** (E = -1663.4688728 au)

| Center Number | Atomic Number | Coordinates (Angstroms) |           |           |
|---------------|---------------|-------------------------|-----------|-----------|
|               |               | X                       | Y         | Z         |
| 1             | 77            | 0.229055                | 0.400968  | 0.821611  |
| 2             | 6             | 0.768071                | 2.249049  | -0.171100 |
| 3             | 6             | 1.686892                | 2.284216  | 0.978353  |
| 4             | 6             | 0.899895                | 2.319568  | 2.141509  |
| 5             | 6             | -0.504341               | 2.324915  | 1.746894  |
| 6             | 6             | -0.590041               | 2.400824  | 0.319556  |
| 7             | 6             | 1.194892                | 2.443948  | -1.586688 |
| 8             | 9             | 2.382449                | 1.818279  | -1.883865 |
| 9             | 9             | 1.392423                | 3.784569  | -1.877620 |
| 10            | 9             | 0.280681                | 1.990109  | -2.504889 |
| 11            | 6             | 3.185981                | 2.366276  | 0.919732  |
| 12            | 1             | 3.624566                | 2.212962  | 1.907366  |
| 13            | 1             | 3.617615                | 1.632583  | 0.239585  |
| 14            | 1             | 3.480785                | 3.364412  | 0.569930  |
| 15            | 6             | 1.389361                | 2.414387  | 3.559267  |
| 16            | 1             | 1.398482                | 3.464484  | 3.879814  |
| 17            | 1             | 0.739086                | 1.869751  | 4.248746  |
| 18            | 1             | 2.402844                | 2.021907  | 3.669038  |
| 19            | 6             | -1.655250               | 2.503025  | 2.698957  |
| 20            | 1             | -2.596069               | 2.146680  | 2.274330  |
| 21            | 1             | -1.486255               | 1.978766  | 3.642677  |
| 22            | 1             | -1.772674               | 3.570021  | 2.929772  |
| 23            | 6             | -1.831683               | 2.716367  | -0.467595 |
| 24            | 1             | -1.902967               | 3.804092  | -0.598285 |
| 25            | 1             | -1.826317               | 2.260894  | -1.457930 |
| 26            | 1             | -2.728384               | 2.385377  | 0.060652  |
| 27            | 6             | 1.192112                | -2.084786 | 1.500165  |
| 28            | 7             | 1.459233                | -1.296493 | 0.525485  |
| 29            | 6             | 0.163548                | -1.348023 | 2.306621  |
| 30            | 6             | 0.478450                | -1.155446 | 3.775922  |

|    |   |           |           |           |
|----|---|-----------|-----------|-----------|
| 31 | 1 | -0.249967 | -0.491641 | 4.247137  |
| 32 | 1 | 0.427543  | -2.125028 | 4.289082  |
| 33 | 1 | 1.482507  | -0.748523 | 3.927912  |
| 34 | 6 | 1.790478  | -3.410017 | 1.824035  |
| 35 | 1 | 1.024155  | -4.090008 | 2.206601  |
| 36 | 1 | 2.274422  | -3.855071 | 0.953171  |
| 37 | 1 | 2.542961  | -3.283977 | 2.613575  |
| 38 | 6 | -1.121673 | -1.118702 | 1.779017  |
| 39 | 1 | -1.812087 | -0.675332 | 2.491556  |
| 40 | 8 | 2.260794  | -1.743724 | -0.534462 |
| 41 | 6 | 3.612819  | -1.423224 | -0.434983 |
| 42 | 8 | 4.061094  | -0.873923 | 0.530656  |
| 43 | 6 | 4.364784  | -1.911702 | -1.674826 |
| 44 | 6 | 3.672755  | -1.398164 | -2.964559 |
| 45 | 1 | 3.630679  | -0.304221 | -2.985319 |
| 46 | 1 | 4.250307  | -1.733621 | -3.832142 |
| 47 | 1 | 2.655503  | -1.788055 | -3.058449 |
| 48 | 6 | 5.814440  | -1.385537 | -1.602626 |
| 49 | 1 | 6.367744  | -1.742416 | -2.477047 |
| 50 | 1 | 5.840656  | -0.290983 | -1.602957 |
| 51 | 1 | 6.324586  | -1.741104 | -0.702430 |
| 52 | 6 | 4.363045  | -3.467494 | -1.657248 |
| 53 | 1 | 4.945498  | -3.830123 | -2.510425 |
| 54 | 1 | 4.822997  | -3.855948 | -0.741601 |
| 55 | 1 | 3.348367  | -3.867981 | -1.740850 |
| 56 | 6 | -1.028732 | -0.677239 | -0.523298 |
| 57 | 1 | -1.699019 | 0.015645  | -1.026670 |
| 58 | 1 | -0.417395 | -1.192846 | -1.264244 |
| 59 | 6 | -1.756835 | -1.614570 | 0.462015  |
| 60 | 6 | -1.531625 | -3.115628 | 0.191670  |
| 61 | 1 | -0.470795 | -3.372810 | 0.130007  |
| 62 | 1 | -1.991425 | -3.726544 | 0.978430  |
| 63 | 1 | -1.981666 | -3.393643 | -0.766851 |
| 64 | 6 | -3.278037 | -1.304857 | 0.542955  |
| 65 | 1 | -3.693875 | -1.845637 | 1.407092  |
| 66 | 1 | -3.393675 | -0.231893 | 0.757864  |
| 67 | 6 | -4.098598 | -1.649704 | -0.713357 |
| 68 | 1 | -4.122204 | -2.737666 | -0.861570 |
| 69 | 1 | -3.616962 | -1.222388 | -1.605184 |
| 70 | 6 | -5.547833 | -1.132565 | -0.631360 |
| 71 | 1 | -6.026070 | -1.540606 | 0.270718  |
| 72 | 1 | -5.535321 | -0.040944 | -0.501626 |
| 73 | 6 | -6.386813 | -1.494687 | -1.866701 |
| 74 | 1 | -6.445467 | -2.582388 | -1.997854 |
| 75 | 1 | -7.410001 | -1.112136 | -1.779679 |
| 76 | 1 | -5.947084 | -1.072076 | -2.778815 |

42 (E = -3042.231943 au)

| Center Number | Atomic Number | Coordinates (Angstroms) |          |           |
|---------------|---------------|-------------------------|----------|-----------|
|               |               | X                       | Y        | Z         |
| 1             | 77            | 0.116988                | 0.239618 | 0.728766  |
| 2             | 6             | 1.007602                | 2.129681 | -0.194769 |
| 3             | 6             | 1.454237                | 2.025980 | 1.186497  |
| 4             | 6             | 0.284478                | 2.131683 | 2.007401  |
| 5             | 6             | -0.873167               | 2.262600 | 1.159391  |
| 6             | 6             | -0.413863               | 2.314866 | -0.204780 |
| 7             | 6             | 1.889024                | 2.301087 | -1.385752 |
| 8             | 9             | 3.145509                | 1.782330 | -1.212465 |
| 9             | 9             | 2.067970                | 3.640748 | -1.688423 |
| 10            | 9             | 1.385439                | 1.725392 | -2.529270 |

|    |   |           |           |           |
|----|---|-----------|-----------|-----------|
| 11 | 6 | 2.867369  | 2.026172  | 1.700436  |
| 12 | 1 | 2.891802  | 1.769574  | 2.761291  |
| 13 | 1 | 3.505544  | 1.325584  | 1.164560  |
| 14 | 1 | 3.288875  | 3.033548  | 1.588147  |
| 15 | 6 | 0.269473  | 2.222209  | 3.506311  |
| 16 | 1 | 0.421042  | 3.269152  | 3.799950  |
| 17 | 1 | -0.686629 | 1.896926  | 3.921895  |
| 18 | 1 | 1.062317  | 1.626244  | 3.962946  |
| 19 | 6 | -2.257750 | 2.603138  | 1.641790  |
| 20 | 1 | -3.004552 | 2.500180  | 0.852893  |
| 21 | 1 | -2.564356 | 1.976422  | 2.483104  |
| 22 | 1 | -2.276256 | 3.647446  | 1.979304  |
| 23 | 6 | -1.276531 | 2.665944  | -1.383524 |
| 24 | 1 | -1.345027 | 3.760255  | -1.443224 |
| 25 | 1 | -0.869351 | 2.305325  | -2.327762 |
| 26 | 1 | -2.294228 | 2.285466  | -1.272700 |
| 27 | 6 | 1.597489  | -2.132925 | 1.692475  |
| 28 | 7 | 1.525752  | -1.300396 | 0.682588  |
| 29 | 6 | 0.668586  | -1.806715 | 2.759508  |
| 30 | 6 | 0.652055  | -2.589512 | 4.055919  |
| 31 | 1 | -0.088926 | -2.161811 | 4.737591  |
| 32 | 1 | 0.391530  | -3.643435 | 3.896567  |
| 33 | 1 | 1.627602  | -2.562847 | 4.556487  |
| 34 | 6 | 2.507492  | -3.321427 | 1.736723  |
| 35 | 1 | 2.028305  | -4.143158 | 2.274065  |
| 36 | 1 | 2.786230  | -3.665195 | 0.740759  |
| 37 | 1 | 3.424358  | -3.061284 | 2.281096  |
| 38 | 6 | -0.182878 | -0.798976 | 2.450491  |
| 39 | 1 | -0.966761 | -0.514829 | 3.148655  |
| 40 | 8 | 2.238906  | -1.632488 | -0.489787 |
| 41 | 6 | 3.586096  | -1.306798 | -0.508992 |
| 42 | 8 | 4.142638  | -0.823764 | 0.437589  |
| 43 | 6 | 4.224511  | -1.723156 | -1.839711 |
| 44 | 6 | 3.294437  | -1.433299 | -3.043070 |
| 45 | 1 | 3.042482  | -0.370398 | -3.106266 |
| 46 | 1 | 3.813120  | -1.715590 | -3.965231 |
| 47 | 1 | 2.366255  | -2.008371 | -2.984689 |
| 48 | 6 | 5.556921  | -0.956558 | -1.998468 |
| 49 | 1 | 6.042193  | -1.272231 | -2.927587 |
| 50 | 1 | 5.389740  | 0.124364  | -2.049422 |
| 51 | 1 | 6.236399  | -1.160956 | -1.166210 |
| 52 | 6 | 4.507385  | -3.252382 | -1.753360 |
| 53 | 1 | 5.019218  | -3.567865 | -2.668552 |
| 54 | 1 | 5.154060  | -3.491314 | -0.901999 |
| 55 | 1 | 3.579620  | -3.827295 | -1.668737 |
| 56 | 6 | -0.790261 | -0.741353 | -1.037875 |
| 57 | 1 | -1.156782 | 0.049991  | -1.679825 |
| 58 | 1 | -0.053331 | -1.393082 | -1.491353 |
| 59 | 6 | -1.625531 | -1.245661 | -0.028561 |
| 60 | 6 | -1.489685 | -2.693799 | 0.395823  |
| 61 | 1 | -0.466419 | -3.059626 | 0.307171  |
| 62 | 1 | -1.844745 | -2.862359 | 1.415708  |
| 63 | 1 | -2.107835 | -3.301573 | -0.278423 |
| 64 | 6 | -2.984137 | -0.616296 | 0.245428  |
| 65 | 1 | -3.179781 | -0.608705 | 1.324864  |
| 66 | 1 | -2.981705 | 0.422456  | -0.094248 |
| 67 | 6 | -4.133328 | -1.370663 | -0.476172 |
| 68 | 1 | -4.230720 | -2.382943 | -0.072582 |
| 69 | 1 | -3.895958 | -1.459912 | -1.542513 |
| 70 | 6 | -5.459322 | -0.613355 | -0.295991 |
| 71 | 1 | -5.694008 | -0.513242 | 0.768608  |
| 72 | 1 | -5.375128 | 0.397868  | -0.706310 |
| 73 | 6 | -6.684801 | -1.253187 | -0.957572 |

|    |    |           |           |           |
|----|----|-----------|-----------|-----------|
| 74 | 17 | -8.150276 | -0.208986 | -0.644108 |
| 75 | 17 | -6.468122 | -1.396624 | -2.761194 |
| 76 | 17 | -7.017272 | -2.912117 | -0.281477 |

**TS42-43** (E = -3042.1914008 au)

| Center Number | Atomic Number | Coordinates (Angstroms) |           |           |
|---------------|---------------|-------------------------|-----------|-----------|
|               |               | X                       | Y         | Z         |
| 1             | 77            | 0.196936                | 0.394041  | 0.514737  |
| 2             | 6             | 1.081592                | 2.209296  | -0.288896 |
| 3             | 6             | 1.558655                | 2.196508  | 1.107555  |
| 4             | 6             | 0.422821                | 2.270328  | 1.932794  |
| 5             | 6             | -0.763127               | 2.349059  | 1.086338  |
| 6             | 6             | -0.350735               | 2.402249  | -0.284522 |
| 7             | 6             | 1.961418                | 2.389553  | -1.477978 |
| 8             | 9             | 3.178969                | 1.764649  | -1.353471 |
| 9             | 9             | 2.248049                | 3.729613  | -1.692732 |
| 10            | 9             | 1.410848                | 1.932411  | -2.649778 |
| 11            | 6             | 2.990435                | 2.207675  | 1.562707  |
| 12            | 1             | 3.056458                | 2.048806  | 2.640963  |
| 13            | 1             | 3.589886                | 1.443855  | 1.067368  |
| 14            | 1             | 3.435632                | 3.186019  | 1.338475  |
| 15            | 6             | 0.399048                | 2.324715  | 3.434797  |
| 16            | 1             | 0.316657                | 3.367592  | 3.768030  |
| 17            | 1             | -0.457331               | 1.781626  | 3.843702  |
| 18            | 1             | 1.306638                | 1.903052  | 3.872056  |
| 19            | 6             | -2.150545               | 2.608564  | 1.603924  |
| 20            | 1             | -2.915380               | 2.409767  | 0.850539  |
| 21            | 1             | -2.373571               | 2.006705  | 2.489378  |
| 22            | 1             | -2.236701               | 3.664116  | 1.894237  |
| 23            | 6             | -1.243158               | 2.700318  | -1.458028 |
| 24            | 1             | -1.217487               | 3.778194  | -1.663443 |
| 25            | 1             | -0.928231               | 2.177540  | -2.361390 |
| 26            | 1             | -2.279509               | 2.428953  | -1.245704 |
| 27            | 6             | 1.341197                | -2.166888 | 1.499224  |
| 28            | 7             | 1.450457                | -1.276401 | 0.546222  |
| 29            | 6             | 0.281928                | -1.825389 | 2.438069  |
| 30            | 6             | 0.311936                | -2.351235 | 3.846647  |
| 31            | 1             | -0.491697               | -1.908004 | 4.439328  |
| 32            | 1             | 0.181584                | -3.442230 | 3.860845  |
| 33            | 1             | 1.269997                | -2.136556 | 4.335467  |
| 34            | 6             | 2.184007                | -3.399365 | 1.621115  |
| 35            | 1             | 1.620992                | -4.206582 | 2.094594  |
| 36            | 1             | 2.544367                | -3.740697 | 0.650395  |
| 37            | 1             | 3.055718                | -3.185179 | 2.253143  |
| 38            | 6             | -0.695808               | -0.993686 | 1.935767  |
| 39            | 1             | -1.448645               | -0.652274 | 2.636492  |
| 40            | 8             | 2.254506                | -1.643979 | -0.557385 |
| 41            | 6             | 3.596690                | -1.307576 | -0.470837 |
| 42            | 8             | 4.067878                | -0.820968 | 0.519216  |
| 43            | 6             | 4.339186                | -1.715664 | -1.747955 |
| 44            | 6             | 3.510048                | -1.402772 | -3.017965 |
| 45            | 1             | 3.276311                | -0.336053 | -3.088516 |
| 46            | 1             | 4.096690                | -1.682501 | -3.899186 |
| 47            | 1             | 2.573524                | -1.966726 | -3.038204 |
| 48            | 6             | 5.686000                | -0.959336 | -1.788748 |
| 49            | 1             | 6.241644                | -1.268382 | -2.679864 |
| 50            | 1             | 5.532454                | 0.123579  | -1.839092 |
| 51            | 1             | 6.294766                | -1.180269 | -0.907341 |
| 52            | 6             | 4.601566                | -3.248239 | -1.656854 |

|    |    |           |           |           |
|----|----|-----------|-----------|-----------|
| 53 | 1  | 5.184282  | -3.557706 | -2.530680 |
| 54 | 1  | 5.174262  | -3.502500 | -0.758144 |
| 55 | 1  | 3.665386  | -3.815643 | -1.655292 |
| 56 | 6  | -1.020618 | -0.735379 | -0.770612 |
| 57 | 1  | -1.714380 | -0.080048 | -1.290068 |
| 58 | 1  | -0.469951 | -1.362726 | -1.468267 |
| 59 | 6  | -1.596724 | -1.465494 | 0.397840  |
| 60 | 6  | -1.447109 | -2.989711 | 0.299257  |
| 61 | 1  | -0.425074 | -3.290509 | 0.063835  |
| 62 | 1  | -1.770367 | -3.487000 | 1.218849  |
| 63 | 1  | -2.075172 | -3.334790 | -0.530946 |
| 64 | 6  | -3.027641 | -1.032651 | 0.783147  |
| 65 | 1  | -3.299862 | -1.484938 | 1.744561  |
| 66 | 1  | -3.045382 | 0.054133  | 0.914406  |
| 67 | 6  | -4.087247 | -1.434492 | -0.271790 |
| 68 | 1  | -4.172047 | -2.524172 | -0.323469 |
| 69 | 1  | -3.786410 | -1.079723 | -1.263031 |
| 70 | 6  | -5.451853 | -0.831205 | 0.104216  |
| 71 | 1  | -5.751064 | -1.167094 | 1.102263  |
| 72 | 1  | -5.385377 | 0.260857  | 0.136131  |
| 73 | 6  | -6.610479 | -1.173080 | -0.838888 |
| 74 | 17 | -8.133061 | -0.364847 | -0.236188 |
| 75 | 17 | -6.287465 | -0.580261 | -2.531558 |
| 76 | 17 | -6.910586 | -2.969066 | -0.901963 |

43 (E = -3042.2219713 au)

| Center Number | Atomic Number | Coordinates (Angstroms) |           |           |
|---------------|---------------|-------------------------|-----------|-----------|
|               |               | X                       | Y         | Z         |
| 1             | 77            | 0.225753                | 0.400481  | 0.816456  |
| 2             | 6             | 0.766451                | 2.248441  | -0.174372 |
| 3             | 6             | 1.684058                | 2.280729  | 0.975997  |
| 4             | 6             | 0.895643                | 2.315732  | 2.138526  |
| 5             | 6             | -0.508081               | 2.324324  | 1.742476  |
| 6             | 6             | -0.591992               | 2.401449  | 0.315090  |
| 7             | 6             | 1.194438                | 2.443441  | -1.589872 |
| 8             | 9             | 2.382724                | 1.818892  | -1.885580 |
| 9             | 9             | 1.390334                | 3.784006  | -1.880630 |
| 10            | 9             | 0.281298                | 1.987992  | -2.508303 |
| 11            | 6             | 3.183250                | 2.361215  | 0.919917  |
| 12            | 1             | 3.620383                | 2.200548  | 1.906996  |
| 13            | 1             | 3.615096                | 1.632123  | 0.235074  |
| 14            | 1             | 3.479304                | 3.361571  | 0.577561  |
| 15            | 6             | 1.384135                | 2.408868  | 3.556663  |
| 16            | 1             | 1.398388                | 3.459234  | 3.876095  |
| 17            | 1             | 0.730293                | 1.868325  | 4.245933  |
| 18            | 1             | 2.395494                | 2.011339  | 3.667745  |
| 19            | 6             | -1.659605               | 2.503344  | 2.693537  |
| 20            | 1             | -2.600895               | 2.150043  | 2.267438  |
| 21            | 1             | -1.492826               | 1.977376  | 3.636664  |
| 22            | 1             | -1.774710               | 3.570260  | 2.925794  |
| 23            | 6             | -1.832323               | 2.718842  | -0.473304 |
| 24            | 1             | -1.902933               | 3.806851  | -0.601842 |
| 25            | 1             | -1.825597               | 2.265689  | -1.464695 |
| 26            | 1             | -2.730052               | 2.387508  | 0.053032  |
| 27            | 6             | 1.193816                | -2.083493 | 1.494480  |
| 28            | 7             | 1.458550                | -1.294879 | 0.519366  |
| 29            | 6             | 0.162451                | -1.349782 | 2.300246  |
| 30            | 6             | 0.474577                | -1.157972 | 3.770129  |
| 31            | 1             | -0.255767               | -0.496264 | 4.241233  |
| 32            | 1             | 0.424983                | -2.128348 | 4.281871  |

|    |    |           |           |           |
|----|----|-----------|-----------|-----------|
| 33 | 1  | 1.477613  | -0.749332 | 3.923888  |
| 34 | 6  | 1.796386  | -3.406454 | 1.819555  |
| 35 | 1  | 1.033354  | -4.087274 | 2.207125  |
| 36 | 1  | 2.277846  | -3.852678 | 0.947887  |
| 37 | 1  | 2.551958  | -3.276524 | 2.605500  |
| 38 | 6  | -1.122532 | -1.121607 | 1.771296  |
| 39 | 1  | -1.814744 | -0.681041 | 2.483679  |
| 40 | 8  | 2.262445  | -1.738319 | -0.539716 |
| 41 | 6  | 3.615795  | -1.423079 | -0.433295 |
| 42 | 8  | 4.061531  | -0.879489 | 0.536592  |
| 43 | 6  | 4.371091  | -1.909782 | -1.671677 |
| 44 | 6  | 3.681996  | -1.397081 | -2.963239 |
| 45 | 1  | 3.638219  | -0.303210 | -2.983949 |
| 46 | 1  | 4.262677  | -1.731417 | -3.829150 |
| 47 | 1  | 2.665690  | -1.788613 | -3.060343 |
| 48 | 6  | 5.820037  | -1.382141 | -1.595489 |
| 49 | 1  | 6.376005  | -1.738419 | -2.468453 |
| 50 | 1  | 5.845129  | -0.287550 | -1.595779 |
| 51 | 1  | 6.328122  | -1.737242 | -0.693966 |
| 52 | 6  | 4.370893  | -3.465662 | -1.653937 |
| 53 | 1  | 4.956225  | -3.827673 | -2.505387 |
| 54 | 1  | 4.828548  | -3.853570 | -0.736920 |
| 55 | 1  | 3.356867  | -3.867175 | -1.740606 |
| 56 | 6  | -1.029222 | -0.676788 | -0.531216 |
| 57 | 1  | -1.701150 | 0.016307  | -1.032318 |
| 58 | 1  | -0.418380 | -1.189609 | -1.274295 |
| 59 | 6  | -1.753307 | -1.619255 | 0.452542  |
| 60 | 6  | -1.523071 | -3.119259 | 0.180167  |
| 61 | 1  | -0.461170 | -3.372321 | 0.126627  |
| 62 | 1  | -1.986796 | -3.733723 | 0.961614  |
| 63 | 1  | -1.961774 | -3.397751 | -0.783585 |
| 64 | 6  | -3.275582 | -1.315356 | 0.537019  |
| 65 | 1  | -3.690508 | -1.861299 | 1.397243  |
| 66 | 1  | -3.396482 | -0.243836 | 0.752266  |
| 67 | 6  | -4.080882 | -1.669114 | -0.729049 |
| 68 | 1  | -4.095989 | -2.753807 | -0.874608 |
| 69 | 1  | -3.603998 | -1.227914 | -1.611963 |
| 70 | 6  | -5.524467 | -1.151176 | -0.608949 |
| 71 | 1  | -6.001978 | -1.571125 | 0.282380  |
| 72 | 1  | -5.525965 | -0.062599 | -0.493443 |
| 73 | 6  | -6.447701 | -1.467661 | -1.789839 |
| 74 | 17 | -8.104519 | -0.768849 | -1.464820 |
| 75 | 17 | -5.821704 | -0.738715 | -3.338696 |
| 76 | 17 | -6.631520 | -3.264916 | -2.030572 |

**44** (E = -1718.824193 au)

| Center Number | Atomic Number | Coordinates (Angstroms) |          |           |
|---------------|---------------|-------------------------|----------|-----------|
|               |               | X                       | Y        | Z         |
| 1             | 77            | 0.142983                | 0.253387 | 0.738635  |
| 2             | 6             | 1.035148                | 2.139556 | -0.196334 |
| 3             | 6             | 1.484607                | 2.035733 | 1.184411  |
| 4             | 6             | 0.317134                | 2.146440 | 2.008155  |
| 5             | 6             | -0.842273               | 2.277679 | 1.162418  |
| 6             | 6             | -0.385679               | 2.326270 | -0.202913 |
| 7             | 6             | 1.914603                | 2.306188 | -1.388668 |
| 8             | 9             | 3.169304                | 1.781378 | -1.217922 |
| 9             | 9             | 2.100676                | 3.645173 | -1.692927 |
| 10            | 9             | 1.406599                | 1.733115 | -2.531713 |
| 11            | 6             | 2.899269                | 2.033885 | 1.694659  |
| 12            | 1             | 2.925574                | 1.781579 | 2.756535  |

|    |   |           |           |           |
|----|---|-----------|-----------|-----------|
| 13 | 1 | 3.533664  | 1.328671  | 1.160278  |
| 14 | 1 | 3.324136  | 3.039255  | 1.577120  |
| 15 | 6 | 0.306126  | 2.239734  | 3.507129  |
| 16 | 1 | 0.460673  | 3.286618  | 3.799397  |
| 17 | 1 | -0.649659 | 1.916820  | 3.925361  |
| 18 | 1 | 1.098523  | 1.642257  | 3.962669  |
| 19 | 6 | -2.225864 | 2.620112  | 1.646052  |
| 20 | 1 | -2.976399 | 2.496874  | 0.863749  |
| 21 | 1 | -2.523849 | 2.006770  | 2.500210  |
| 22 | 1 | -2.248745 | 3.670349  | 1.964624  |
| 23 | 6 | -1.252293 | 2.673336  | -1.380005 |
| 24 | 1 | -1.323300 | 3.767375  | -1.442118 |
| 25 | 1 | -0.847267 | 2.311073  | -2.324556 |
| 26 | 1 | -2.268556 | 2.290314  | -1.264734 |
| 27 | 6 | 1.601394  | -2.132450 | 1.702280  |
| 28 | 7 | 1.540934  | -1.295964 | 0.694487  |
| 29 | 6 | 0.672522  | -1.800663 | 2.766621  |
| 30 | 6 | 0.645240  | -2.585326 | 4.061848  |
| 31 | 1 | -0.093492 | -2.151596 | 4.742252  |
| 32 | 1 | 0.374901  | -3.636536 | 3.900394  |
| 33 | 1 | 1.619549  | -2.568998 | 4.565356  |
| 34 | 6 | 2.501591  | -3.328715 | 1.745988  |
| 35 | 1 | 2.015748  | -4.147006 | 2.282583  |
| 36 | 1 | 2.777676  | -3.673925 | 0.749719  |
| 37 | 1 | 3.420634  | -3.076585 | 2.290501  |
| 38 | 6 | -0.169672 | -0.784854 | 2.455554  |
| 39 | 1 | -0.952527 | -0.494702 | 3.152602  |
| 40 | 8 | 2.253456  | -1.634210 | -0.477283 |
| 41 | 6 | 3.601148  | -1.314878 | -0.496145 |
| 42 | 8 | 4.160368  | -0.833600 | 0.450057  |
| 43 | 6 | 4.238151  | -1.734857 | -1.826599 |
| 44 | 6 | 3.311695  | -1.435549 | -3.030500 |
| 45 | 1 | 3.068907  | -0.370439 | -3.092442 |
| 46 | 1 | 3.828674  | -1.721093 | -3.952646 |
| 47 | 1 | 2.378501  | -2.002575 | -2.973470 |
| 48 | 6 | 5.576859  | -0.978908 | -1.982967 |
| 49 | 1 | 6.060267  | -1.296713 | -2.912352 |
| 50 | 1 | 5.418513  | 0.103447  | -2.031898 |
| 51 | 1 | 6.254050  | -1.190368 | -1.150591 |
| 52 | 6 | 4.508417  | -3.266396 | -1.742328 |
| 53 | 1 | 5.019059  | -3.584818 | -2.657188 |
| 54 | 1 | 5.151745  | -3.511979 | -0.890296 |
| 55 | 1 | 3.575837  | -3.833768 | -1.659865 |
| 56 | 6 | -0.779446 | -0.737211 | -1.019859 |
| 57 | 1 | -1.139545 | 0.055350  | -1.664071 |
| 58 | 1 | -0.044157 | -1.393269 | -1.470085 |
| 59 | 6 | -1.627509 | -1.238996 | -0.021463 |
| 60 | 6 | -1.493137 | -2.683508 | 0.411692  |
| 61 | 1 | -0.471149 | -3.053444 | 0.323639  |
| 62 | 1 | -1.849028 | -2.845384 | 1.432423  |
| 63 | 1 | -2.116285 | -3.290376 | -0.258710 |
| 64 | 6 | -2.981364 | -0.603464 | 0.248295  |
| 65 | 1 | -3.176159 | -0.585295 | 1.328382  |
| 66 | 1 | -2.975067 | 0.433342  | -0.099258 |
| 67 | 6 | -4.139628 | -1.351127 | -0.464285 |
| 68 | 1 | -4.246748 | -2.361297 | -0.048498 |
| 69 | 1 | -3.902356 | -1.465603 | -1.528879 |
| 70 | 6 | -5.477902 | -0.607014 | -0.313121 |
| 71 | 1 | -5.708801 | -0.485565 | 0.754196  |
| 72 | 1 | -5.386466 | 0.409413  | -0.724163 |
| 73 | 6 | -6.666645 | -1.312681 | -0.984167 |
| 74 | 1 | -6.726884 | -2.348868 | -0.628398 |
| 75 | 1 | -7.596863 | -0.810550 | -0.676676 |

|    |   |           |           |           |
|----|---|-----------|-----------|-----------|
| 76 | 7 | -6.508166 | -1.359191 | -2.461696 |
| 77 | 1 | -7.290334 | -1.872130 | -2.868440 |
| 78 | 1 | -6.578057 | -0.411453 | -2.835428 |

**TS44-45** (E = -1718.7846091 au)

| Center Number | Atomic Number | Coordinates (Angstroms) |           |           |
|---------------|---------------|-------------------------|-----------|-----------|
|               |               | X                       | Y         | Z         |
| 1             | 77            | 0.197230                | 0.401657  | 0.526991  |
| 2             | 6             | 1.096589                | 2.211182  | -0.263622 |
| 3             | 6             | 1.560045                | 2.200646  | 1.138527  |
| 4             | 6             | 0.415881                | 2.277651  | 1.949993  |
| 5             | 6             | -0.761976               | 2.358939  | 1.090545  |
| 6             | 6             | -0.335161               | 2.409778  | -0.275608 |
| 7             | 6             | 1.987177                | 2.378305  | -1.447261 |
| 8             | 9             | 3.210822                | 1.771755  | -1.296490 |
| 9             | 9             | 2.258513                | 3.717030  | -1.687986 |
| 10            | 9             | 1.455449                | 1.889039  | -2.615624 |
| 11            | 6             | 2.987244                | 2.206089  | 1.608403  |
| 12            | 1             | 3.040153                | 2.061286  | 2.689434  |
| 13            | 1             | 3.584637                | 1.430273  | 1.129277  |
| 14            | 1             | 3.444283                | 3.176885  | 1.375756  |
| 15            | 6             | 0.375356                | 2.331270  | 3.451913  |
| 16            | 1             | 0.299011                | 3.374470  | 3.785694  |
| 17            | 1             | -0.491049               | 1.796190  | 3.850192  |
| 18            | 1             | 1.273629                | 1.900167  | 3.899336  |
| 19            | 6             | -2.153377               | 2.628194  | 1.592794  |
| 20            | 1             | -2.911866               | 2.431916  | 0.832190  |
| 21            | 1             | -2.390275               | 2.030060  | 2.477053  |
| 22            | 1             | -2.235083               | 3.685040  | 1.879918  |
| 23            | 6             | -1.213647               | 2.706638  | -1.459486 |
| 24            | 1             | -1.199859               | 3.786378  | -1.656016 |
| 25            | 1             | -0.876938               | 2.194537  | -2.361099 |
| 26            | 1             | -2.248941               | 2.418368  | -1.264745 |
| 27            | 6             | 1.337882                | -2.165724 | 1.496202  |
| 28            | 7             | 1.449650                | -1.271311 | 0.548301  |
| 29            | 6             | 0.282696                | -1.821668 | 2.440079  |
| 30            | 6             | 0.327498                | -2.337352 | 3.852075  |
| 31            | 1             | -0.461822               | -1.879962 | 4.453119  |
| 32            | 1             | 0.182739                | -3.426463 | 3.876247  |
| 33            | 1             | 1.295381                | -2.132065 | 4.325041  |
| 34            | 6             | 2.174600                | -3.403690 | 1.606620  |
| 35            | 1             | 1.625122                | -4.197353 | 2.116774  |
| 36            | 1             | 2.489594                | -3.764383 | 0.626644  |
| 37            | 1             | 3.075268                | -3.186767 | 2.195624  |
| 38            | 6             | -0.702842               | -0.997032 | 1.941059  |
| 39            | 1             | -1.450579               | -0.656423 | 2.647795  |
| 40            | 8             | 2.246520                | -1.640234 | -0.559790 |
| 41            | 6             | 3.589713                | -1.306253 | -0.483876 |
| 42            | 8             | 4.069820                | -0.816821 | 0.500494  |
| 43            | 6             | 4.320411                | -1.720172 | -1.766116 |
| 44            | 6             | 3.490558                | -1.384705 | -3.030190 |
| 45            | 1             | 3.276514                | -0.313448 | -3.093912 |
| 46            | 1             | 4.066864                | -1.671007 | -3.916139 |
| 47            | 1             | 2.543581                | -1.930970 | -3.047965 |
| 48            | 6             | 5.679384                | -0.986344 | -1.808317 |
| 49            | 1             | 6.226577                | -1.299254 | -2.703349 |
| 50            | 1             | 5.543864                | 0.099340  | -1.851452 |
| 51            | 1             | 6.287864                | -1.222334 | -0.930519 |
| 52            | 6             | 4.556270                | -3.257554 | -1.687054 |
| 53            | 1             | 5.131247                | -3.570797 | -2.564662 |

|    |   |           |           |           |
|----|---|-----------|-----------|-----------|
| 54 | 1 | 5.126188  | -3.529129 | -0.791686 |
| 55 | 1 | 3.610036  | -3.807926 | -1.687348 |
| 56 | 6 | -1.015427 | -0.730157 | -0.754727 |
| 57 | 1 | -1.708386 | -0.081722 | -1.284520 |
| 58 | 1 | -0.460498 | -1.360407 | -1.446820 |
| 59 | 6 | -1.603620 | -1.458572 | 0.412602  |
| 60 | 6 | -1.464803 | -2.984398 | 0.311591  |
| 61 | 1 | -0.444217 | -3.293947 | 0.080468  |
| 62 | 1 | -1.796226 | -3.479355 | 1.229869  |
| 63 | 1 | -2.094329 | -3.322482 | -0.520153 |
| 64 | 6 | -3.034668 | -1.016809 | 0.785020  |
| 65 | 1 | -3.312334 | -1.454355 | 1.752238  |
| 66 | 1 | -3.048591 | 0.071867  | 0.902101  |
| 67 | 6 | -4.099378 | -1.421130 | -0.261957 |
| 68 | 1 | -4.200881 | -2.513372 | -0.291198 |
| 69 | 1 | -3.780124 | -1.103746 | -1.263803 |
| 70 | 6 | -5.470169 | -0.795137 | 0.055279  |
| 71 | 1 | -5.785280 | -1.095293 | 1.065499  |
| 72 | 1 | -5.387475 | 0.299344  | 0.065250  |
| 73 | 6 | -6.554344 | -1.200105 | -0.951818 |
| 74 | 1 | -6.264103 | -0.867857 | -1.956217 |
| 75 | 1 | -6.630516 | -2.298925 | -0.983325 |
| 76 | 7 | -7.846742 | -0.545485 | -0.624179 |
| 77 | 1 | -8.540845 | -0.793231 | -1.329419 |
| 78 | 1 | -8.202993 | -0.921951 | 0.255410  |

45 (E = -1718.8148219 au)

| Center Number | Atomic Number | Coordinates (Angstroms) |           |           |
|---------------|---------------|-------------------------|-----------|-----------|
|               |               | X                       | Y         | Z         |
| 1             | 77            | 0.214905                | 0.383754  | 0.821017  |
| 2             | 6             | 0.701654                | 2.238141  | -0.188889 |
| 3             | 6             | 1.648904                | 2.284796  | 0.935945  |
| 4             | 6             | 0.892695                | 2.311696  | 2.120399  |
| 5             | 6             | -0.520555               | 2.299307  | 1.762908  |
| 6             | 6             | -0.645235               | 2.370002  | 0.337932  |
| 7             | 6             | 1.082786                | 2.441943  | -1.616406 |
| 8             | 9             | 2.276611                | 1.848183  | -1.949470 |
| 9             | 9             | 1.234638                | 3.787175  | -1.913608 |
| 10            | 9             | 0.153808                | 1.962813  | -2.506891 |
| 11            | 6             | 3.145224                | 2.380450  | 0.841689  |
| 12            | 1             | 3.612862                | 2.171918  | 1.805541  |
| 13            | 1             | 3.561723                | 1.693489  | 0.105989  |
| 14            | 1             | 3.423706                | 3.400247  | 0.544292  |
| 15            | 6             | 1.420687                | 2.416434  | 3.523559  |
| 16            | 1             | 1.444014                | 3.469256  | 3.834365  |
| 17            | 1             | 0.786404                | 1.881321  | 4.234821  |
| 18            | 1             | 2.435028                | 2.019991  | 3.609461  |
| 19            | 6             | -1.648984               | 2.462342  | 2.744001  |
| 20            | 1             | -2.596490               | 2.097939  | 2.341600  |
| 21            | 1             | -1.451538               | 1.937099  | 3.681689  |
| 22            | 1             | -1.771122               | 3.527405  | 2.981121  |
| 23            | 6             | -1.910619               | 2.671145  | -0.416472 |
| 24            | 1             | -1.993873               | 3.757460  | -0.551814 |
| 25            | 1             | -1.929399               | 2.209794  | -1.403935 |
| 26            | 1             | -2.789804               | 2.336909  | 0.138367  |
| 27            | 6             | 1.213685                | -2.089122 | 1.501361  |
| 28            | 7             | 1.466664                | -1.299859 | 0.523899  |
| 29            | 6             | 0.180806                | -1.363140 | 2.311975  |
| 30            | 6             | 0.503054                | -1.165608 | 3.779162  |
| 31            | 1             | -0.230390               | -0.510960 | 4.255305  |

|    |   |           |           |           |
|----|---|-----------|-----------|-----------|
| 32 | 1 | 0.467261  | -2.135733 | 4.292683  |
| 33 | 1 | 1.503128  | -0.746742 | 3.924855  |
| 34 | 6 | 1.830452  | -3.405742 | 1.825664  |
| 35 | 1 | 1.074239  | -4.094745 | 2.212207  |
| 36 | 1 | 2.316792  | -3.846441 | 0.953901  |
| 37 | 1 | 2.584100  | -3.268647 | 2.612169  |
| 38 | 6 | -1.110457 | -1.148353 | 1.792849  |
| 39 | 1 | -1.799966 | -0.710728 | 2.509820  |
| 40 | 8 | 2.276040  | -1.734945 | -0.534721 |
| 41 | 6 | 3.628239  | -1.417166 | -0.419684 |
| 42 | 8 | 4.067934  | -0.876428 | 0.554546  |
| 43 | 6 | 4.390058  | -1.895092 | -1.657563 |
| 44 | 6 | 3.715088  | -1.358465 | -2.947047 |
| 45 | 1 | 3.682123  | -0.263956 | -2.953334 |
| 46 | 1 | 4.298709  | -1.686625 | -3.813362 |
| 47 | 1 | 2.695729  | -1.738625 | -3.056474 |
| 48 | 6 | 5.842627  | -1.380671 | -1.563496 |
| 49 | 1 | 6.402277  | -1.730312 | -2.436812 |
| 50 | 1 | 5.877017  | -0.286444 | -1.549290 |
| 51 | 1 | 6.340915  | -1.751772 | -0.662910 |
| 52 | 6 | 4.376766  | -3.450830 | -1.661596 |
| 53 | 1 | 4.965776  | -3.805979 | -2.513407 |
| 54 | 1 | 4.824087  | -3.855354 | -0.746612 |
| 55 | 1 | 3.360192  | -3.842580 | -1.761544 |
| 56 | 6 | -1.037836 | -0.713547 | -0.511671 |
| 57 | 1 | -1.718028 | -0.030322 | -1.014890 |
| 58 | 1 | -0.425148 | -1.226283 | -1.253487 |
| 59 | 6 | -1.750278 | -1.654257 | 0.481946  |
| 60 | 6 | -1.513941 | -3.154123 | 0.214941  |
| 61 | 1 | -0.451232 | -3.401977 | 0.147618  |
| 62 | 1 | -1.963447 | -3.766494 | 1.006484  |
| 63 | 1 | -1.967095 | -3.439393 | -0.740047 |
| 64 | 6 | -3.273694 | -1.357298 | 0.572576  |
| 65 | 1 | -3.680841 | -1.903307 | 1.437334  |
| 66 | 1 | -3.397310 | -0.285936 | 0.789780  |
| 67 | 6 | -4.095407 | -1.707590 | -0.681874 |
| 68 | 1 | -4.113604 | -2.795833 | -0.827068 |
| 69 | 1 | -3.615270 | -1.279789 | -1.573938 |
| 70 | 6 | -5.545886 | -1.194512 | -0.597930 |
| 71 | 1 | -6.032605 | -1.607720 | 0.297768  |
| 72 | 1 | -5.544299 | -0.101514 | -0.475448 |
| 73 | 6 | -6.382578 | -1.559260 | -1.837424 |
| 74 | 1 | -5.907127 | -1.146443 | -2.736297 |
| 75 | 1 | -6.401891 | -2.649471 | -1.960927 |
| 76 | 7 | -7.788696 | -1.088418 | -1.822206 |
| 77 | 1 | -8.263987 | -1.462280 | -0.999974 |
| 78 | 1 | -7.806683 | -0.073584 | -1.714775 |

46 (E = -1662.2278953 au)

| Center Number | Atomic Number | Coordinates (Angstroms) |          |           |
|---------------|---------------|-------------------------|----------|-----------|
|               |               | X                       | Y        | Z         |
| 1             | 77            | 0.317495                | 0.413776 | 0.652621  |
| 2             | 6             | 1.120303                | 2.219467 | -0.268412 |
| 3             | 6             | 1.646494                | 2.273510 | 1.108509  |
| 4             | 6             | 0.537896                | 2.356305 | 1.970483  |
| 5             | 6             | -0.679039               | 2.368852 | 1.165548  |
| 6             | 6             | -0.314175               | 2.372208 | -0.220735 |
| 7             | 6             | 1.956475                | 2.366948 | -1.492478 |
| 8             | 9             | 3.190689                | 1.772358 | -1.381732 |
| 9             | 9             | 2.208062                | 3.702391 | -1.772261 |

|    |   |           |           |           |
|----|---|-----------|-----------|-----------|
| 10 | 9 | 1.380135  | 1.850030  | -2.626590 |
| 11 | 6 | 3.093918  | 2.334064  | 1.509512  |
| 12 | 1 | 3.199270  | 2.255842  | 2.593489  |
| 13 | 1 | 3.683839  | 1.540532  | 1.049860  |
| 14 | 1 | 3.520315  | 3.296696  | 1.198509  |
| 15 | 6 | 0.565232  | 2.473172  | 3.469111  |
| 16 | 1 | 0.451395  | 3.525009  | 3.762781  |
| 17 | 1 | -0.252336 | 1.913702  | 3.932096  |
| 18 | 1 | 1.504575  | 2.107178  | 3.889123  |
| 19 | 6 | -2.053849 | 2.628071  | 1.716926  |
| 20 | 1 | -2.840210 | 2.349680  | 1.012062  |
| 21 | 1 | -2.225868 | 2.090542  | 2.653511  |
| 22 | 1 | -2.162033 | 3.700030  | 1.929800  |
| 23 | 6 | -1.255073 | 2.593578  | -1.373306 |
| 24 | 1 | -1.251619 | 3.658402  | -1.639701 |
| 25 | 1 | -0.969299 | 2.024406  | -2.258182 |
| 26 | 1 | -2.278576 | 2.323329  | -1.104923 |
| 27 | 6 | 1.599989  | -2.075094 | 1.646269  |
| 28 | 7 | 1.624757  | -1.213982 | 0.660338  |
| 29 | 6 | 0.597982  | -1.723376 | 2.642073  |
| 30 | 6 | 0.746833  | -2.180865 | 4.067758  |
| 31 | 1 | -0.091779 | -1.829547 | 4.673514  |
| 32 | 1 | 0.786688  | -3.275675 | 4.138384  |
| 33 | 1 | 1.677748  | -1.799891 | 4.507597  |
| 34 | 6 | 2.476713  | -3.284780 | 1.756141  |
| 35 | 1 | 1.918862  | -4.127483 | 2.173351  |
| 36 | 1 | 2.890985  | -3.578930 | 0.792796  |
| 37 | 1 | 3.309356  | -3.070772 | 2.438768  |
| 38 | 6 | -0.427178 | -0.927015 | 2.176576  |
| 39 | 1 | -1.140717 | -0.579404 | 2.912700  |
| 40 | 8 | 2.359020  | -1.598939 | -0.485580 |
| 41 | 6 | 3.693097  | -1.225938 | -0.510949 |
| 42 | 8 | 4.224404  | -0.692646 | 0.423189  |
| 43 | 6 | 4.347682  | -1.662728 | -1.826542 |
| 44 | 6 | 3.417476  | -1.413566 | -3.039500 |
| 45 | 1 | 3.153931  | -0.355336 | -3.129354 |
| 46 | 1 | 3.941566  | -1.713434 | -3.952972 |
| 47 | 1 | 2.495408  | -1.996944 | -2.967697 |
| 48 | 6 | 5.668701  | -0.879314 | -1.995886 |
| 49 | 1 | 6.163371  | -1.208748 | -2.915165 |
| 50 | 1 | 5.484778  | 0.197246  | -2.072460 |
| 51 | 1 | 6.347123  | -1.054282 | -1.155996 |
| 52 | 6 | 4.652798  | -3.185247 | -1.704851 |
| 53 | 1 | 5.174286  | -3.513058 | -2.610175 |
| 54 | 1 | 5.298756  | -3.395382 | -0.845287 |
| 55 | 1 | 3.733437  | -3.772276 | -1.612405 |
| 56 | 6 | -3.486516 | -1.848750 | 2.287804  |
| 57 | 6 | -2.869846 | -1.061501 | 1.113444  |
| 58 | 6 | -1.315199 | -3.026211 | 0.632453  |
| 59 | 6 | -1.926701 | -3.795965 | 1.815506  |
| 60 | 6 | -3.385246 | -3.369338 | 2.068329  |
| 61 | 1 | -3.484139 | -1.238620 | 0.216932  |
| 62 | 1 | -2.902659 | 0.014823  | 1.302032  |
| 63 | 1 | -2.994226 | -1.583265 | 3.233088  |
| 64 | 1 | -4.536608 | -1.549710 | 2.393445  |
| 65 | 1 | -1.867066 | -3.293598 | -0.283799 |
| 66 | 1 | -0.278254 | -3.320207 | 0.446797  |
| 67 | 1 | -1.877015 | -4.870065 | 1.597981  |
| 68 | 1 | -1.335118 | -3.635995 | 2.726112  |
| 69 | 1 | -4.002420 | -3.654820 | 1.203304  |
| 70 | 1 | -3.790052 | -3.903247 | 2.936206  |
| 71 | 6 | -1.447089 | -1.490047 | 0.702466  |
| 72 | 6 | -0.929770 | -0.804849 | -0.513439 |

|    |   |           |           |           |
|----|---|-----------|-----------|-----------|
| 73 | 1 | -0.389117 | -1.455433 | -1.198657 |
| 74 | 1 | -1.665523 | -0.200789 | -1.039456 |

**TS46-47** (E = -1662.2278953 au)

| Center Number | Atomic Number | Coordinates (Angstroms) |           |           |
|---------------|---------------|-------------------------|-----------|-----------|
|               |               | X                       | Y         | Z         |
| 1             | 77            | 0.317495                | 0.413776  | 0.652621  |
| 2             | 6             | 1.120303                | 2.219467  | -0.268412 |
| 3             | 6             | 1.646494                | 2.273510  | 1.108509  |
| 4             | 6             | 0.537896                | 2.356305  | 1.970483  |
| 5             | 6             | -0.679039               | 2.368852  | 1.165548  |
| 6             | 6             | -0.314175               | 2.372208  | -0.220735 |
| 7             | 6             | 1.956475                | 2.366948  | -1.492478 |
| 8             | 9             | 3.190689                | 1.772358  | -1.381732 |
| 9             | 9             | 2.208062                | 3.702391  | -1.772261 |
| 10            | 9             | 1.380135                | 1.850030  | -2.626590 |
| 11            | 6             | 3.093918                | 2.334064  | 1.509512  |
| 12            | 1             | 3.199270                | 2.255842  | 2.593489  |
| 13            | 1             | 3.683839                | 1.540532  | 1.049860  |
| 14            | 1             | 3.520315                | 3.296696  | 1.198509  |
| 15            | 6             | 0.565232                | 2.473172  | 3.469111  |
| 16            | 1             | 0.451395                | 3.525009  | 3.762781  |
| 17            | 1             | -0.252336               | 1.913702  | 3.932096  |
| 18            | 1             | 1.504575                | 2.107178  | 3.889123  |
| 19            | 6             | -2.053849               | 2.628071  | 1.716926  |
| 20            | 1             | -2.840210               | 2.349680  | 1.012062  |
| 21            | 1             | -2.225868               | 2.090542  | 2.653511  |
| 22            | 1             | -2.162033               | 3.700030  | 1.929800  |
| 23            | 6             | -1.255073               | 2.593578  | -1.373306 |
| 24            | 1             | -1.251619               | 3.658402  | -1.639701 |
| 25            | 1             | -0.969299               | 2.024406  | -2.258182 |
| 26            | 1             | -2.278576               | 2.323329  | -1.104923 |
| 27            | 6             | 1.599989                | -2.075094 | 1.646269  |
| 28            | 7             | 1.624757                | -1.213982 | 0.660338  |
| 29            | 6             | 0.597982                | -1.723376 | 2.642073  |
| 30            | 6             | 0.746833                | -2.180865 | 4.067758  |
| 31            | 1             | -0.091779               | -1.829547 | 4.673514  |
| 32            | 1             | 0.786688                | -3.275675 | 4.138384  |
| 33            | 1             | 1.677748                | -1.799891 | 4.507597  |
| 34            | 6             | 2.476713                | -3.284780 | 1.756141  |
| 35            | 1             | 1.918862                | -4.127483 | 2.173351  |
| 36            | 1             | 2.890985                | -3.578930 | 0.792796  |
| 37            | 1             | 3.309356                | -3.070772 | 2.438768  |
| 38            | 6             | -0.427178               | -0.927015 | 2.176576  |
| 39            | 1             | -1.140717               | -0.579404 | 2.912700  |
| 40            | 8             | 2.359020                | -1.598939 | -0.485580 |
| 41            | 6             | 3.693097                | -1.225938 | -0.510949 |
| 42            | 8             | 4.224404                | -0.692646 | 0.423189  |
| 43            | 6             | 4.347682                | -1.662728 | -1.826542 |
| 44            | 6             | 3.417476                | -1.413566 | -3.039500 |
| 45            | 1             | 3.153931                | -0.355336 | -3.129354 |
| 46            | 1             | 3.941566                | -1.713434 | -3.952972 |
| 47            | 1             | 2.495408                | -1.996944 | -2.967697 |
| 48            | 6             | 5.668701                | -0.879314 | -1.995886 |
| 49            | 1             | 6.163371                | -1.208748 | -2.915165 |
| 50            | 1             | 5.484778                | 0.197246  | -2.072460 |
| 51            | 1             | 6.347123                | -1.054282 | -1.155996 |
| 52            | 6             | 4.652798                | -3.185247 | -1.704851 |
| 53            | 1             | 5.174286                | -3.513058 | -2.610175 |
| 54            | 1             | 5.298756                | -3.395382 | -0.845287 |

|    |   |           |           |           |
|----|---|-----------|-----------|-----------|
| 55 | 1 | 3.733437  | -3.772276 | -1.612405 |
| 56 | 6 | -3.486516 | -1.848750 | 2.287804  |
| 57 | 6 | -2.869846 | -1.061501 | 1.113444  |
| 58 | 6 | -1.315199 | -3.026211 | 0.632453  |
| 59 | 6 | -1.926701 | -3.795965 | 1.815506  |
| 60 | 6 | -3.385246 | -3.369338 | 2.068329  |
| 61 | 1 | -3.484139 | -1.238620 | 0.216932  |
| 62 | 1 | -2.902659 | 0.014823  | 1.302032  |
| 63 | 1 | -2.994226 | -1.583265 | 3.233088  |
| 64 | 1 | -4.536608 | -1.549710 | 2.393445  |
| 65 | 1 | -1.867066 | -3.293598 | -0.283799 |
| 66 | 1 | -0.278254 | -3.320207 | 0.446797  |
| 67 | 1 | -1.877015 | -4.870065 | 1.597981  |
| 68 | 1 | -1.335118 | -3.635995 | 2.726112  |
| 69 | 1 | -4.002420 | -3.654820 | 1.203304  |
| 70 | 1 | -3.790052 | -3.903247 | 2.936206  |
| 71 | 6 | -1.447089 | -1.490047 | 0.702466  |
| 72 | 6 | -0.929770 | -0.804849 | -0.513439 |
| 73 | 1 | -0.389117 | -1.455433 | -1.198657 |
| 74 | 1 | -1.665523 | -0.200789 | -1.039456 |

47 (E = -1662.260602 au)

| Center Number | Atomic Number | Coordinates (Angstroms) |           |           |
|---------------|---------------|-------------------------|-----------|-----------|
|               |               | X                       | Y         | Z         |
| 1             | 77            | 0.390733                | 0.429405  | 0.849770  |
| 2             | 6             | 0.835249                | 2.247222  | -0.243998 |
| 3             | 6             | 1.759512                | 2.396445  | 0.891348  |
| 4             | 6             | 0.981500                | 2.455801  | 2.058711  |
| 5             | 6             | -0.424013               | 2.366326  | 1.679000  |
| 6             | 6             | -0.524848               | 2.358758  | 0.250766  |
| 7             | 6             | 1.241269                | 2.395367  | -1.671035 |
| 8             | 9             | 2.460769                | 1.824703  | -1.947443 |
| 9             | 9             | 1.360668                | 3.729267  | -2.028961 |
| 10            | 9             | 0.348214                | 1.846280  | -2.557226 |
| 11            | 6             | 3.252317                | 2.541744  | 0.806012  |
| 12            | 1             | 3.701373                | 2.548616  | 1.800857  |
| 13            | 1             | 3.713055                | 1.737986  | 0.231550  |
| 14            | 1             | 3.500639                | 3.492154  | 0.316562  |
| 15            | 6             | 1.473984                | 2.650830  | 3.465004  |
| 16            | 1             | 1.414439                | 3.712978  | 3.736848  |
| 17            | 1             | 0.865809                | 2.096863  | 4.184687  |
| 18            | 1             | 2.511915                | 2.331754  | 3.583242  |
| 19            | 6             | -1.575019               | 2.547834  | 2.630032  |
| 20            | 1             | -2.498080               | 2.110146  | 2.244453  |
| 21            | 1             | -1.368609               | 2.106077  | 3.607666  |
| 22            | 1             | -1.750274               | 3.620934  | 2.783239  |
| 23            | 6             | -1.783805               | 2.581387  | -0.540627 |
| 24            | 1             | -1.883976               | 3.653969  | -0.752655 |
| 25            | 1             | -1.780159               | 2.052457  | -1.493955 |
| 26            | 1             | -2.665082               | 2.270824  | 0.024367  |
| 27            | 6             | 1.442107                | -1.993990 | 1.635289  |
| 28            | 7             | 1.685846                | -1.237191 | 0.630001  |
| 29            | 6             | 0.397353                | -1.254436 | 2.418699  |
| 30            | 6             | 0.720580                | -0.987908 | 3.875138  |
| 31            | 1             | -0.031719               | -0.340926 | 4.331938  |
| 32            | 1             | 0.719139                | -1.938384 | 4.425542  |
| 33            | 1             | 1.707451                | -0.532406 | 3.999492  |
| 34            | 6             | 2.081309                | -3.288001 | 2.005526  |
| 35            | 1             | 1.338160                | -3.981325 | 2.409134  |
| 36            | 1             | 2.584010                | -3.744374 | 1.151423  |

|    |   |           |           |           |
|----|---|-----------|-----------|-----------|
| 37 | 1 | 2.825605  | -3.110239 | 2.792899  |
| 38 | 6 | -0.898981 | -1.089829 | 1.894308  |
| 39 | 1 | -1.591228 | -0.629356 | 2.592892  |
| 40 | 8 | 2.484283  | -1.718091 | -0.418675 |
| 41 | 6 | 3.812694  | -1.304141 | -0.395740 |
| 42 | 8 | 4.256997  | -0.656897 | 0.509599  |
| 43 | 6 | 4.550453  | -1.826792 | -1.630517 |
| 44 | 6 | 3.801051  | -1.399497 | -2.920270 |
| 45 | 1 | 3.713973  | -0.310233 | -2.988433 |
| 46 | 1 | 4.366320  | -1.751563 | -3.789365 |
| 47 | 1 | 2.798144  | -1.833036 | -2.964695 |
| 48 | 6 | 5.979268  | -1.242113 | -1.626329 |
| 49 | 1 | 6.522333  | -1.619798 | -2.498450 |
| 50 | 1 | 5.961634  | -0.148781 | -1.679181 |
| 51 | 1 | 6.527831  | -1.533448 | -0.725455 |
| 52 | 6 | 4.612248  | -3.378575 | -1.545701 |
| 53 | 1 | 5.177297  | -3.755569 | -2.404421 |
| 54 | 1 | 5.121459  | -3.707727 | -0.632911 |
| 55 | 1 | 3.612867  | -3.822706 | -1.572985 |
| 56 | 6 | -3.809140 | -2.255257 | 1.665351  |
| 57 | 6 | -3.054234 | -1.401232 | 0.626573  |
| 58 | 6 | -1.298885 | -3.184489 | 0.397335  |
| 59 | 6 | -2.022049 | -4.047334 | 1.451157  |
| 60 | 6 | -3.535401 | -3.757841 | 1.464826  |
| 61 | 1 | -3.435439 | -1.630336 | -0.379097 |
| 62 | 1 | -3.239827 | -0.332689 | 0.799769  |
| 63 | 1 | -3.507296 | -1.963321 | 2.683023  |
| 64 | 1 | -4.884778 | -2.050757 | 1.593939  |
| 65 | 1 | -1.686498 | -3.429084 | -0.603195 |
| 66 | 1 | -0.228754 | -3.421500 | 0.371957  |
| 67 | 1 | -1.838998 | -5.109602 | 1.247147  |
| 68 | 1 | -1.604857 | -3.841942 | 2.449042  |
| 69 | 1 | -3.972701 | -4.081774 | 0.508332  |
| 70 | 1 | -4.027302 | -4.341923 | 2.252459  |
| 71 | 6 | -1.524837 | -1.665964 | 0.606708  |
| 72 | 6 | -0.816385 | -0.774377 | -0.428700 |
| 73 | 1 | -0.179617 | -1.323069 | -1.123996 |
| 74 | 1 | -1.505943 | -0.146821 | -0.990790 |

48 (E = -1662.2712109 au)

| Center Number | Atomic Number | Coordinates (Angstroms) |          |           |
|---------------|---------------|-------------------------|----------|-----------|
|               |               | X                       | Y        | Z         |
| 1             | 77            | 0.163594                | 0.219103 | 0.910729  |
| 2             | 6             | 0.940346                | 2.062912 | -0.193337 |
| 3             | 6             | 1.475150                | 2.063528 | 1.160970  |
| 4             | 6             | 0.358252                | 2.200089 | 2.046932  |
| 5             | 6             | -0.853845               | 2.239214 | 1.269054  |
| 6             | 6             | -0.483672               | 2.210638 | -0.123541 |
| 7             | 6             | 1.754081                | 2.179143 | -1.437168 |
| 8             | 9             | 3.001346                | 1.619280 | -1.325384 |
| 9             | 9             | 1.963830                | 3.505624 | -1.777677 |
| 10            | 9             | 1.168135                | 1.599743 | -2.537053 |
| 11            | 6             | 2.916890                | 2.133344 | 1.582491  |
| 12            | 1             | 3.018878                | 1.906653 | 2.645555  |
| 13            | 1             | 3.549031                | 1.444266 | 1.025419  |
| 14            | 1             | 3.287751                | 3.153625 | 1.418739  |
| 15            | 6             | 0.438070                | 2.397166 | 3.533486  |
| 16            | 1             | 0.567081                | 3.467313 | 3.742065  |
| 17            | 1             | -0.474912               | 2.069690 | 4.035173  |
| 18            | 1             | 1.282774                | 1.864557 | 3.975353  |

|    |   |           |           |           |
|----|---|-----------|-----------|-----------|
| 19 | 6 | -2.215992 | 2.574960  | 1.814199  |
| 20 | 1 | -3.013853 | 2.318576  | 1.115341  |
| 21 | 1 | -2.415709 | 2.061564  | 2.758299  |
| 22 | 1 | -2.274634 | 3.654938  | 2.002782  |
| 23 | 6 | -1.437215 | 2.456911  | -1.258364 |
| 24 | 1 | -1.553204 | 3.542284  | -1.378528 |
| 25 | 1 | -1.084366 | 2.052211  | -2.206329 |
| 26 | 1 | -2.428189 | 2.048007  | -1.049817 |
| 27 | 6 | 1.769621  | -2.046128 | 1.933297  |
| 28 | 7 | 1.612527  | -1.285709 | 0.877554  |
| 29 | 6 | 0.903772  | -1.666814 | 3.034471  |
| 30 | 6 | 0.991630  | -2.356244 | 4.380380  |
| 31 | 1 | 0.293629  | -1.889833 | 5.081960  |
| 32 | 1 | 0.737781  | -3.421894 | 4.314469  |
| 33 | 1 | 1.999471  | -2.282850 | 4.806693  |
| 34 | 6 | 2.713600  | -3.207422 | 1.995156  |
| 35 | 1 | 2.311195  | -3.987096 | 2.645471  |
| 36 | 1 | 2.907467  | -3.632674 | 1.009998  |
| 37 | 1 | 3.670374  | -2.880744 | 2.422356  |
| 38 | 6 | 0.006000  | -0.703555 | 2.712731  |
| 39 | 1 | -0.739841 | -0.388929 | 3.438800  |
| 40 | 8 | 2.256100  | -1.684825 | -0.314558 |
| 41 | 6 | 3.587493  | -1.325855 | -0.447222 |
| 42 | 8 | 4.191925  | -0.768091 | 0.426313  |
| 43 | 6 | 4.148384  | -1.809494 | -1.790254 |
| 44 | 6 | 3.126416  | -1.637589 | -2.940465 |
| 45 | 1 | 2.827569  | -0.591308 | -3.056212 |
| 46 | 1 | 3.590813  | -1.964376 | -3.876758 |
| 47 | 1 | 2.228911  | -2.240309 | -2.777177 |
| 48 | 6 | 5.434422  | -1.008463 | -2.095096 |
| 49 | 1 | 5.863461  | -1.367499 | -3.036061 |
| 50 | 1 | 5.221170  | 0.060165  | -2.201431 |
| 51 | 1 | 6.179393  | -1.133780 | -1.304287 |
| 52 | 6 | 4.499500  | -3.317659 | -1.622600 |
| 53 | 1 | 4.967609  | -3.675085 | -2.545825 |
| 54 | 1 | 5.205926  | -3.474006 | -0.800066 |
| 55 | 1 | 3.603623  | -3.920225 | -1.441211 |
| 56 | 6 | -2.520582 | -3.664096 | 0.256050  |
| 57 | 6 | -1.442032 | -2.754375 | 0.908321  |
| 58 | 6 | -2.970648 | -0.749600 | 0.634210  |
| 59 | 6 | -4.063584 | -1.666877 | 0.015763  |
| 60 | 6 | -3.936899 | -3.117916 | 0.509412  |
| 61 | 1 | -1.585240 | -2.768041 | 1.994482  |
| 62 | 1 | -0.446075 | -3.151792 | 0.694801  |
| 63 | 1 | -2.335532 | -3.730863 | -0.825747 |
| 64 | 1 | -2.418970 | -4.677973 | 0.661739  |
| 65 | 1 | -3.141453 | -0.667202 | 1.715435  |
| 66 | 1 | -3.055349 | 0.251716  | 0.205870  |
| 67 | 1 | -5.050651 | -1.257959 | 0.263092  |
| 68 | 1 | -3.970868 | -1.641669 | -1.079575 |
| 69 | 1 | -4.154853 | -3.159437 | 1.587129  |
| 70 | 1 | -4.681388 | -3.751120 | 0.011492  |
| 71 | 6 | -1.596506 | -1.341169 | 0.370002  |
| 72 | 6 | -0.816111 | -0.914483 | -0.716201 |
| 73 | 1 | -1.223394 | -0.186332 | -1.407387 |
| 74 | 1 | -0.088526 | -1.591536 | -1.147062 |

TS48-49 (E = -1662.2313266 au)

| Center Number | Atomic Number | Coordinates (Angstroms) |   |   |
|---------------|---------------|-------------------------|---|---|
|               |               | X                       | Y | Z |

|    |    |           |           |           |
|----|----|-----------|-----------|-----------|
| 1  | 77 | 0.235896  | 0.371745  | 0.718215  |
| 2  | 6  | 1.032027  | 2.139976  | -0.253234 |
| 3  | 6  | 1.577462  | 2.246439  | 1.114501  |
| 4  | 6  | 0.481226  | 2.354435  | 1.985768  |
| 5  | 6  | -0.747626 | 2.338962  | 1.196436  |
| 6  | 6  | -0.402900 | 2.300211  | -0.193979 |
| 7  | 6  | 1.854071  | 2.256488  | -1.491223 |
| 8  | 9  | 3.086670  | 1.658857  | -1.382931 |
| 9  | 9  | 2.107344  | 3.584835  | -1.799676 |
| 10 | 9  | 1.261147  | 1.719294  | -2.606474 |
| 11 | 6  | 3.031023  | 2.311176  | 1.491308  |
| 12 | 1  | 3.151523  | 2.281595  | 2.576063  |
| 13 | 1  | 3.605427  | 1.490367  | 1.060079  |
| 14 | 1  | 3.463523  | 3.253148  | 1.129888  |
| 15 | 6  | 0.525060  | 2.512264  | 3.480083  |
| 16 | 1  | 0.392482  | 3.568947  | 3.747112  |
| 17 | 1  | -0.274639 | 1.948337  | 3.968430  |
| 18 | 1  | 1.477120  | 2.177335  | 3.897357  |
| 19 | 6  | -2.113584 | 2.616890  | 1.760240  |
| 20 | 1  | -2.910553 | 2.331087  | 1.070494  |
| 21 | 1  | -2.277545 | 2.097462  | 2.708283  |
| 22 | 1  | -2.211257 | 3.693463  | 1.954101  |
| 23 | 6  | -1.357229 | 2.491183  | -1.341036 |
| 24 | 1  | -1.345805 | 3.545427  | -1.646433 |
| 25 | 1  | -1.090926 | 1.886637  | -2.208386 |
| 26 | 1  | -2.379535 | 2.242503  | -1.048490 |
| 27 | 6  | 1.540944  | -2.088720 | 1.766320  |
| 28 | 7  | 1.548649  | -1.262721 | 0.752524  |
| 29 | 6  | 0.564815  | -1.697944 | 2.774688  |
| 30 | 6  | 0.744677  | -2.111414 | 4.210097  |
| 31 | 1  | -0.032932 | -1.668344 | 4.836717  |
| 32 | 1  | 0.685334  | -3.203275 | 4.316503  |
| 33 | 1  | 1.724147  | -1.804177 | 4.597148  |
| 34 | 6  | 2.408194  | -3.302829 | 1.897568  |
| 35 | 1  | 1.850099  | -4.123106 | 2.356970  |
| 36 | 1  | 2.795744  | -3.634762 | 0.935303  |
| 37 | 1  | 3.259159  | -3.074677 | 2.552333  |
| 38 | 6  | -0.481942 | -0.932043 | 2.310658  |
| 39 | 1  | -1.177333 | -0.560810 | 3.054293  |
| 40 | 8  | 2.259322  | -1.687126 | -0.393765 |
| 41 | 6  | 3.593737  | -1.317848 | -0.452150 |
| 42 | 8  | 4.141034  | -0.758587 | 0.457303  |
| 43 | 6  | 4.226959  | -1.793637 | -1.764494 |
| 44 | 6  | 3.276174  | -1.582830 | -2.968616 |
| 45 | 1  | 3.007718  | -0.528339 | -3.084822 |
| 46 | 1  | 3.786064  | -1.907646 | -3.881591 |
| 47 | 1  | 2.357347  | -2.166375 | -2.864416 |
| 48 | 6  | 5.543461  | -1.013730 | -1.979933 |
| 49 | 1  | 6.022104  | -1.369649 | -2.897803 |
| 50 | 1  | 5.356313  | 0.059857  | -2.084991 |
| 51 | 1  | 6.237033  | -1.162843 | -1.147480 |
| 52 | 6  | 4.537634  | -3.311091 | -1.600843 |
| 53 | 1  | 5.048095  | -3.665261 | -2.502518 |
| 54 | 1  | 5.195314  | -3.493581 | -0.743808 |
| 55 | 1  | 3.621249  | -3.897235 | -1.478118 |
| 56 | 6  | -2.453559 | -3.694290 | 0.026561  |
| 57 | 6  | -1.378345 | -3.056095 | 0.940245  |
| 58 | 6  | -2.913070 | -1.070062 | 1.336998  |
| 59 | 6  | -3.991230 | -1.721087 | 0.434895  |
| 60 | 6  | -3.871715 | -3.254867 | 0.430889  |
| 61 | 1  | -1.517420 | -3.408615 | 1.970045  |
| 62 | 1  | -0.384982 | -3.368938 | 0.605486  |
| 63 | 1  | -2.262545 | -3.416134 | -1.019272 |

|    |   |           |           |           |
|----|---|-----------|-----------|-----------|
| 64 | 1 | -2.356714 | -4.785428 | 0.087003  |
| 65 | 1 | -3.095168 | -1.375760 | 2.375080  |
| 66 | 1 | -2.993563 | 0.019513  | 1.291423  |
| 67 | 1 | -4.980145 | -1.412763 | 0.795570  |
| 68 | 1 | -3.894110 | -1.340105 | -0.591095 |
| 69 | 1 | -4.099932 | -3.641271 | 1.435490  |
| 70 | 1 | -4.611896 | -3.690081 | -0.251420 |
| 71 | 6 | -1.502791 | -1.515367 | 0.905718  |
| 72 | 6 | -1.028047 | -0.897884 | -0.370392 |
| 73 | 1 | -1.777088 | -0.321590 | -0.907583 |
| 74 | 1 | -0.505203 | -1.581370 | -1.036469 |

49 (E = -1662.2603997 au)

| Center Number | Atomic Number | Coordinates (Angstroms) |           |           |
|---------------|---------------|-------------------------|-----------|-----------|
|               |               | X                       | Y         | Z         |
| 1             | 77            | 0.288359                | 0.379473  | 0.963436  |
| 2             | 6             | 0.739683                | 2.158736  | -0.187775 |
| 3             | 6             | 1.670850                | 2.335039  | 0.939161  |
| 4             | 6             | 0.897958                | 2.436576  | 2.106505  |
| 5             | 6             | -0.510618               | 2.345765  | 1.735219  |
| 6             | 6             | -0.616842               | 2.298201  | 0.308579  |
| 7             | 6             | 1.139990                | 2.258563  | -1.620585 |
| 8             | 9             | 2.355815                | 1.673269  | -1.882698 |
| 9             | 9             | 1.263886                | 3.579215  | -2.022802 |
| 10            | 9             | 0.240738                | 1.684648  | -2.484492 |
| 11            | 6             | 3.164438                | 2.467078  | 0.842427  |
| 12            | 1             | 3.616581                | 2.514225  | 1.834865  |
| 13            | 1             | 3.617867                | 1.635646  | 0.302310  |
| 14            | 1             | 3.417765                | 3.393591  | 0.311589  |
| 15            | 6             | 1.395833                | 2.672548  | 3.504523  |
| 16            | 1             | 1.331961                | 3.741656  | 3.746406  |
| 17            | 1             | 0.793696                | 2.136157  | 4.242508  |
| 18            | 1             | 2.435899                | 2.362215  | 3.626793  |
| 19            | 6             | -1.657676               | 2.560308  | 2.684184  |
| 20            | 1             | -2.588288               | 2.137858  | 2.299612  |
| 21            | 1             | -1.462699               | 2.121354  | 3.665512  |
| 22            | 1             | -1.811280               | 3.637876  | 2.828686  |
| 23            | 6             | -1.877440               | 2.502872  | -0.484963 |
| 24            | 1             | -1.978009               | 3.570395  | -0.720935 |
| 25            | 1             | -1.875687               | 1.952398  | -1.426028 |
| 26            | 1             | -2.757860               | 2.205404  | 0.088492  |
| 27            | 6             | 1.345508                | -2.024336 | 1.795895  |
| 28            | 7             | 1.568058                | -1.298164 | 0.763064  |
| 29            | 6             | 0.327439                | -1.255408 | 2.585882  |
| 30            | 6             | 0.692937                | -0.942072 | 4.022175  |
| 31            | 1             | -0.040063               | -0.270742 | 4.474805  |
| 32            | 1             | 0.697829                | -1.872211 | 4.606073  |
| 33            | 1             | 1.686947                | -0.492191 | 4.102167  |
| 34            | 6             | 1.980692                | -3.314591 | 2.185448  |
| 35            | 1             | 1.238260                | -3.989222 | 2.620934  |
| 36            | 1             | 2.460439                | -3.797179 | 1.332688  |
| 37            | 1             | 2.743196                | -3.124291 | 2.952151  |
| 38            | 6             | -0.980332               | -1.094671 | 2.091482  |
| 39            | 1             | -1.655283               | -0.610366 | 2.792284  |
| 40            | 8             | 2.324259                | -1.822058 | -0.296795 |
| 41            | 6             | 3.652816                | -1.413099 | -0.344693 |
| 42            | 8             | 4.137736                | -0.737803 | 0.518424  |
| 43            | 6             | 4.334533                | -1.979080 | -1.592926 |
| 44            | 6             | 3.530215                | -1.589611 | -2.861645 |
| 45            | 1             | 3.447239                | -0.502557 | -2.962128 |

|    |   |           |           |           |
|----|---|-----------|-----------|-----------|
| 46 | 1 | 4.053278  | -1.975161 | -3.742848 |
| 47 | 1 | 2.523557  | -2.016388 | -2.846298 |
| 48 | 6 | 5.763764  | -1.401227 | -1.671020 |
| 49 | 1 | 6.264153  | -1.804938 | -2.556899 |
| 50 | 1 | 5.747462  | -0.309667 | -1.752749 |
| 51 | 1 | 6.352944  | -1.670619 | -0.789190 |
| 52 | 6 | 4.394845  | -3.527657 | -1.461395 |
| 53 | 1 | 4.923453  | -3.934104 | -2.329817 |
| 54 | 1 | 4.939380  | -3.830275 | -0.559872 |
| 55 | 1 | 3.393782  | -3.968122 | -1.433965 |
| 56 | 6 | -2.206160 | -3.844722 | -0.471966 |
| 57 | 6 | -1.423717 | -3.238948 | 0.712504  |
| 58 | 6 | -3.170044 | -1.431146 | 0.934077  |
| 59 | 6 | -3.956008 | -2.027590 | -0.248851 |
| 60 | 6 | -3.711761 | -3.542803 | -0.372058 |
| 61 | 1 | -1.747768 | -3.718420 | 1.648739  |
| 62 | 1 | -0.358171 | -3.463224 | 0.586742  |
| 63 | 1 | -1.814517 | -3.438086 | -1.416246 |
| 64 | 1 | -2.034148 | -4.927973 | -0.502691 |
| 65 | 1 | -3.545294 | -1.866940 | 1.873042  |
| 66 | 1 | -3.336517 | -0.347267 | 0.995020  |
| 67 | 1 | -5.025578 | -1.820768 | -0.118180 |
| 68 | 1 | -3.652431 | -1.533081 | -1.183401 |
| 69 | 1 | -4.127362 | -4.051865 | 0.511073  |
| 70 | 1 | -4.238747 | -3.944238 | -1.246497 |
| 71 | 6 | -1.645006 | -1.709411 | 0.846225  |
| 72 | 6 | -0.961314 | -0.857778 | -0.243634 |
| 73 | 1 | -1.655874 | -0.239099 | -0.807708 |
| 74 | 1 | -0.345153 | -1.428574 | -0.938803 |

$a_1$  (E = -596.5115126 au)

| Center Number | Atomic Number | Coordinates (Angstroms) |           |           |
|---------------|---------------|-------------------------|-----------|-----------|
|               |               | X                       | Y         | Z         |
| 1             | 6             | 7.779023                | -2.802874 | 2.169087  |
| 2             | 7             | 6.665248                | -3.431328 | 2.321158  |
| 3             | 6             | 7.981101                | -1.685677 | 3.128235  |
| 4             | 6             | 6.894790                | -1.412642 | 4.148465  |
| 5             | 1             | 7.177375                | -0.568486 | 4.783820  |
| 6             | 1             | 5.942372                | -1.180813 | 3.658998  |
| 7             | 1             | 6.720538                | -2.288011 | 4.783892  |
| 8             | 6             | 8.830023                | -3.119565 | 1.130690  |
| 9             | 1             | 8.534091                | -3.962874 | 0.509937  |
| 10            | 1             | 8.997611                | -2.250303 | 0.485541  |
| 11            | 1             | 9.781851                | -3.358448 | 1.617307  |
| 12            | 6             | 9.098021                | -0.944653 | 3.084154  |
| 13            | 1             | 9.245811                | -0.129716 | 3.783433  |
| 14            | 1             | 9.890854                | -1.115048 | 2.367819  |
| 15            | 8             | 6.524572                | -4.485924 | 1.378220  |
| 16            | 6             | 5.362333                | -5.196792 | 1.499360  |
| 17            | 8             | 4.518285                | -4.971162 | 2.327950  |
| 18            | 6             | 5.309178                | -6.302317 | 0.433030  |
| 19            | 6             | 6.521165                | -7.254327 | 0.621939  |
| 20            | 1             | 7.469235                | -6.728578 | 0.477378  |
| 21            | 1             | 6.519730                | -7.703380 | 1.622001  |
| 22            | 1             | 6.460781                | -8.063856 | -0.113705 |
| 23            | 6             | 3.993240                | -7.090897 | 0.598102  |
| 24            | 1             | 3.121156                | -6.441783 | 0.470263  |
| 25            | 1             | 3.948278                | -7.881106 | -0.158757 |
| 26            | 1             | 3.929422                | -7.556959 | 1.586549  |
| 27            | 6             | 5.361313                | -5.653519 | -0.976814 |

|    |   |          |           |           |
|----|---|----------|-----------|-----------|
| 28 | 1 | 5.283438 | -6.438419 | -1.737090 |
| 29 | 1 | 4.528486 | -4.955700 | -1.122547 |
| 30 | 1 | 6.299657 | -5.114175 | -1.134346 |

**a<sub>2</sub>** (E = -612.5634646 au)

| Center Number | Atomic Number | Coordinates (Angstroms) |           |           |
|---------------|---------------|-------------------------|-----------|-----------|
|               |               | X                       | Y         | Z         |
| 1             | 6             | 1.952295                | 0.404943  | -0.000300 |
| 2             | 7             | 0.983213                | -0.439856 | 0.011178  |
| 3             | 6             | 3.302959                | -0.226227 | 0.027262  |
| 4             | 6             | 1.810447                | 1.907349  | -0.018067 |
| 5             | 1             | 0.777839                | 2.198677  | -0.202525 |
| 6             | 1             | 2.121775                | 2.329093  | 0.944618  |
| 7             | 1             | 2.446683                | 2.342114  | -0.794004 |
| 8             | 6             | 4.412697                | 0.524825  | 0.169983  |
| 9             | 1             | 5.392899                | 0.064259  | 0.210127  |
| 10            | 1             | 4.368320                | 1.599853  | 0.246275  |
| 11            | 8             | -0.279218               | 0.199062  | 0.008830  |
| 12            | 6             | -1.345852               | -0.662118 | 0.028957  |
| 13            | 8             | -1.238581               | -1.860207 | 0.052731  |
| 14            | 6             | -2.660284               | 0.132320  | 0.015941  |
| 15            | 6             | -2.729816               | 0.978168  | -1.284814 |
| 16            | 1             | -1.921943               | 1.714237  | -1.327186 |
| 17            | 1             | -2.669594               | 0.341419  | -2.175063 |
| 18            | 1             | -3.685113               | 1.513463  | -1.314236 |
| 19            | 6             | -3.841197               | -0.859865 | 0.059487  |
| 20            | 1             | -3.813276               | -1.472737 | 0.966118  |
| 21            | 1             | -4.782766               | -0.300837 | 0.050598  |
| 22            | 1             | -3.830489               | -1.530070 | -0.805867 |
| 23            | 6             | -2.708698               | 1.065019  | 1.256390  |
| 24            | 1             | -3.663731               | 1.601523  | 1.265130  |
| 25            | 1             | -2.633304               | 0.490555  | 2.186954  |
| 26            | 1             | -1.900811               | 1.801880  | 1.235151  |
| 27            | 7             | 3.334443                | -1.610718 | -0.146446 |
| 28            | 1             | 2.481905                | -2.086165 | 0.127509  |
| 29            | 1             | 4.164163                | -2.063449 | 0.219827  |

**AcOH** (E = -229.1515754 au)

| Center Number | Atomic Number | Coordinates (Angstroms) |           |           |
|---------------|---------------|-------------------------|-----------|-----------|
|               |               | X                       | Y         | Z         |
| 1             | 8             | 0.626114                | 1.208100  | 0.000017  |
| 2             | 6             | 0.090277                | 0.122259  | -0.000034 |
| 3             | 8             | 0.795751                | -1.029765 | 0.000058  |
| 4             | 6             | -1.395295               | -0.126133 | -0.000065 |
| 5             | 1             | -1.677718               | -0.706631 | 0.884536  |
| 6             | 1             | -1.930359               | 0.823288  | -0.002609 |
| 7             | 1             | -1.677300               | -0.711439 | -0.881559 |
| 8             | 1             | 1.740568                | -0.808661 | -0.000371 |

**AcO<sup>-</sup>** (E = -228.681307 au)

| Center Number | Atomic Number | Coordinates (Angstroms) |   |   |
|---------------|---------------|-------------------------|---|---|
|               |               | X                       | Y | Z |

|   |   |           |           |           |
|---|---|-----------|-----------|-----------|
| 1 | 8 | 0.758792  | 1.126072  | 0.001846  |
| 2 | 6 | 0.189029  | 0.000003  | -0.009927 |
| 3 | 8 | 0.765587  | -1.122615 | 0.001879  |
| 4 | 6 | -1.353680 | -0.003231 | -0.004000 |
| 5 | 1 | -1.703438 | 0.016953  | 1.037258  |
| 6 | 1 | -1.752697 | 0.882327  | -0.508413 |
| 7 | 1 | -1.750992 | -0.907559 | -0.475084 |

**<sup>t</sup>BuCO<sub>2</sub><sup>-</sup>** (E = -346.5891108 au)

| Center Number | Atomic Number | Coordinates (Angstroms) |           |           |
|---------------|---------------|-------------------------|-----------|-----------|
|               |               | X                       | Y         | Z         |
| 1             | 8             | -1.626616               | -1.115749 | 0.000000  |
| 2             | 6             | -1.046595               | 0.005607  | 0.000000  |
| 3             | 8             | -1.624012               | 1.126344  | 0.000000  |
| 4             | 6             | 0.524390                | -0.022003 | 0.000000  |
| 5             | 6             | 1.003952                | -0.780856 | -1.262906 |
| 6             | 1             | 2.100360                | -0.841546 | -1.280417 |
| 7             | 1             | 0.599986                | -1.797647 | -1.278781 |
| 8             | 1             | 0.680728                | -0.267034 | -2.177740 |
| 9             | 6             | 1.128903                | 1.397387  | 0.000000  |
| 10            | 1             | 0.817361                | 1.962797  | 0.884694  |
| 11            | 1             | 2.225907                | 1.338700  | 0.000000  |
| 12            | 1             | 0.817361                | 1.962797  | -0.884694 |
| 13            | 6             | 1.003952                | -0.780856 | 1.262906  |
| 14            | 1             | 2.100360                | -0.841546 | 1.280417  |
| 15            | 1             | 0.680728                | -0.267034 | 2.177740  |
| 16            | 1             | 0.599986                | -1.797647 | 1.278781  |

**b<sub>1</sub>** (E = -463.7318419 au)

| Center Number | Atomic Number | Coordinates (Angstroms) |           |           |
|---------------|---------------|-------------------------|-----------|-----------|
|               |               | X                       | Y         | Z         |
| 1             | 6             | -2.486031               | -1.565137 | -0.439953 |
| 2             | 1             | -1.866562               | -2.297949 | 0.067095  |
| 3             | 1             | -3.535775               | -1.535881 | -0.165949 |
| 4             | 6             | -1.980046               | -0.738983 | -1.360803 |
| 5             | 6             | -2.838419               | 0.277656  | -2.083152 |
| 6             | 1             | -3.887048               | 0.200487  | -1.780153 |
| 7             | 1             | -2.502641               | 1.303240  | -1.882084 |
| 8             | 1             | -2.778806               | 0.129713  | -3.169972 |
| 9             | 6             | -0.512076               | -0.795891 | -1.748883 |
| 10            | 1             | -0.042468               | -1.665234 | -1.275281 |
| 11            | 1             | -0.431280               | -0.940361 | -2.835470 |
| 12            | 6             | 0.265148                | 0.475279  | -1.357014 |
| 13            | 1             | 0.198264                | 0.648583  | -0.275296 |
| 14            | 1             | -0.161215               | 1.366750  | -1.834242 |
| 15            | 6             | 1.731038                | 0.415275  | -1.734741 |
| 16            | 8             | 2.274621                | -0.493760 | -2.350058 |
| 17            | 8             | 2.393056                | 1.518140  | -1.304076 |
| 18            | 6             | 3.836615                | 1.600776  | -1.609910 |
| 19            | 1             | 3.957800                | 1.550772  | -2.695593 |
| 20            | 1             | 4.329163                | 0.732942  | -1.162524 |
| 21            | 6             | 4.341771                | 2.910880  | -1.033162 |
| 22            | 1             | 5.412981                | 3.011631  | -1.237567 |
| 23            | 1             | 3.825783                | 3.764506  | -1.483855 |
| 24            | 1             | 4.195621                | 2.946059  | 0.051024  |

**b<sub>2</sub>** (E = -275.1496827 au)

| Center Number | Atomic Number | Coordinates (Angstroms) |           |           |
|---------------|---------------|-------------------------|-----------|-----------|
|               |               | X                       | Y         | Z         |
| 1             | 6             | 3.782158                | 0.399353  | 1.080023  |
| 2             | 1             | 3.499733                | 1.241749  | 1.703733  |
| 3             | 1             | 4.742141                | -0.063506 | 1.286444  |
| 4             | 6             | 2.984269                | -0.045297 | 0.103087  |
| 5             | 6             | 3.377660                | -1.213007 | -0.776967 |
| 6             | 1             | 4.377358                | -1.582791 | -0.528361 |
| 7             | 1             | 2.670293                | -2.045669 | -0.673781 |
| 8             | 1             | 3.369163                | -0.917681 | -1.835152 |
| 9             | 6             | 1.641843                | 0.603609  | -0.184000 |
| 10            | 1             | 1.550296                | 1.520242  | 0.413782  |
| 11            | 1             | 1.611928                | 0.905518  | -1.243127 |
| 12            | 6             | 0.423468                | -0.306087 | 0.102504  |
| 13            | 1             | 0.461265                | -0.636451 | 1.150861  |
| 14            | 1             | 0.477405                | -1.212670 | -0.516009 |
| 15            | 6             | -0.919318               | 0.399136  | -0.161105 |
| 16            | 1             | -0.977550               | 1.307389  | 0.455793  |
| 17            | 1             | -0.948560               | 0.739441  | -1.206308 |
| 18            | 6             | -2.136571               | -0.494820 | 0.123223  |
| 19            | 1             | -3.075141               | 0.035863  | -0.073109 |
| 20            | 1             | -2.120990               | -1.393307 | -0.506299 |
| 21            | 1             | -2.148687               | -0.821970 | 1.170389  |

**b<sub>3</sub>** (E = -1653.9033865 au)

| Center Number | Atomic Number | Coordinates (Angstroms) |           |           |
|---------------|---------------|-------------------------|-----------|-----------|
|               |               | X                       | Y         | Z         |
| 1             | 6             | 3.669139                | -1.115643 | -0.363326 |
| 2             | 1             | 3.346799                | -2.151771 | -0.385540 |
| 3             | 1             | 4.674981                | -0.907105 | -0.713651 |
| 4             | 6             | 2.865478                | -0.142221 | 0.076488  |
| 5             | 6             | 3.309772                | 1.304347  | 0.120419  |
| 6             | 1             | 4.351838                | 1.410664  | -0.196186 |
| 7             | 1             | 2.690970                | 1.933434  | -0.532176 |
| 8             | 1             | 3.212441                | 1.707367  | 1.137672  |
| 9             | 6             | 1.462326                | -0.442529 | 0.575339  |
| 10            | 1             | 1.321822                | -1.529926 | 0.622643  |
| 11            | 1             | 1.358765                | -0.057281 | 1.601563  |
| 12            | 6             | 0.348550                | 0.177204  | -0.304444 |
| 13            | 1             | 0.459316                | -0.186446 | -1.332478 |
| 14            | 1             | 0.452383                | 1.267110  | -0.328338 |
| 15            | 6             | -1.040291               | -0.197110 | 0.238934  |
| 16            | 1             | -1.157204               | -1.285644 | 0.254338  |
| 17            | 1             | -1.145766               | 0.153822  | 1.270774  |
| 18            | 6             | -2.236158               | 0.361578  | -0.538211 |
| 19            | 17            | -3.787145               | -0.193641 | 0.255171  |
| 20            | 17            | -2.231747               | 2.184675  | -0.549427 |
| 21            | 17            | -2.245247               | -0.225915 | -2.263456 |

**b<sub>4</sub>** (E = -330.495065 au)

| Center Number | Atomic Number | Coordinates (Angstroms) |           |           |
|---------------|---------------|-------------------------|-----------|-----------|
|               |               | X                       | Y         | Z         |
| 1             | 6             | 2.599549                | -1.021787 | -0.379417 |
| 2             | 1             | 2.339249                | -2.075502 | -0.363233 |
| 3             | 1             | 3.578580                | -0.764459 | -0.771394 |
| 4             | 6             | 1.753326                | -0.086061 | 0.064224  |

|    |   |           |           |           |
|----|---|-----------|-----------|-----------|
| 5  | 6 | 2.114576  | 1.384355  | 0.054221  |
| 6  | 1 | 3.134255  | 1.543425  | -0.310227 |
| 7  | 1 | 1.430891  | 1.958612  | -0.583896 |
| 8  | 1 | 2.036644  | 1.806972  | 1.065329  |
| 9  | 6 | 0.384956  | -0.449284 | 0.613497  |
| 10 | 1 | 0.312017  | -1.540985 | 0.704988  |
| 11 | 1 | 0.287127  | -0.033458 | 1.628911  |
| 12 | 6 | -0.796798 | 0.063213  | -0.243824 |
| 13 | 1 | -0.689657 | -0.323855 | -1.267348 |
| 14 | 1 | -0.760367 | 1.158762  | -0.314374 |
| 15 | 6 | -2.162637 | -0.361448 | 0.323675  |
| 16 | 1 | -2.216143 | -1.456360 | 0.389133  |
| 17 | 1 | -2.263416 | 0.017851  | 1.351796  |
| 18 | 6 | -3.342594 | 0.143196  | -0.515928 |
| 19 | 1 | -3.278187 | 1.239310  | -0.611663 |
| 20 | 1 | -3.276935 | -0.273080 | -1.528790 |
| 21 | 7 | -4.635324 | -0.303935 | 0.065014  |
| 22 | 1 | -4.772072 | 0.148784  | 0.969863  |
| 23 | 1 | -5.402482 | 0.022336  | -0.522908 |

$\mathbf{b}_5$  (E = -273.9397298 au)

| Center Number | Atomic Number | Coordinates (Angstroms) |           |           |
|---------------|---------------|-------------------------|-----------|-----------|
|               |               | X                       | Y         | Z         |
| 1             | 6             | -4.667881               | -0.872092 | -0.051407 |
| 2             | 6             | -3.126782               | -0.869646 | -0.057390 |
| 3             | 6             | -2.565451               | 0.574362  | -0.036601 |
| 4             | 6             | -4.665203               | 1.371362  | 1.167830  |
| 5             | 6             | -5.225137               | -0.073191 | 1.143105  |
| 6             | 1             | -1.470578               | 0.563410  | 0.022898  |
| 7             | 1             | -2.757340               | -1.410298 | 0.826403  |
| 8             | 1             | -2.746678               | -1.400702 | -0.939052 |
| 9             | 1             | -5.034603               | -0.426661 | -0.989071 |
| 10            | 1             | -5.043358               | -1.902942 | -0.023381 |
| 11            | 1             | -5.016128               | 1.907080  | 2.057890  |
| 12            | 1             | -5.052731               | 1.909990  | 0.287607  |
| 13            | 1             | -4.951306               | -0.579977 | 2.080139  |
| 14            | 1             | -6.321313               | -0.043398 | 1.104622  |
| 15            | 1             | -2.836883               | 1.067010  | -0.984653 |
| 16            | 6             | -3.149566               | 1.373856  | 1.112477  |
| 17            | 6             | -2.392303               | 1.998816  | 2.019012  |
| 18            | 1             | -2.832437               | 2.555972  | 2.840608  |
| 19            | 1             | -1.308015               | 1.977197  | 1.965276  |
